# Supplementary material for: Orientation Relationship of the Intergrowth Al13Fe3 and Al13Fe4 Intermetallics Determined by Single-Crystal X-ray Diffraction
Source: MDPI journal article supplement (doi:10.3390/met14040463), 2024-04-15

## checkCIF/PLATON report

Structure factors have been supplied for datablock(s) A113Fe4\_a

THIS REPORT IS FOR GUIDANCE ONLY. IF USED AS PART OF A REVIEW PROCEDURE FOR PUBLICATION, IT SHOULD NOT REPLACE THE EXPERTISE OF AN EXPERIENCED CRYSTALLOGRAPHIC REFEREE.

No syntax errors found. CIF dictionary Interpreting this report

**Datablock: Al13Fe4 a**

|                 |                  |                    |              |
|-----------------|------------------|--------------------|--------------|
| Bond precision: | Al-Al = 0.0085 A | Wavelength=0.71073 |              |
| Cell:           | a=15.498 (4)     | b=8.0814 (17)      | c=12.488 (3) |
|                 | alpha=90         | beta=107.790 (8)   | gamma=90     |
| Temperature:    | 300 K            |                    |              |

|                        | Calculated   | Reported     |
|------------------------|--------------|--------------|
| Volume                 | 1489.3(6)    | 1489.2(6)    |
| Space group            | C 2/m        | C 2/m        |
| Hall group             | -C 2y        | -C 2y        |
| Moiety formula         | Al39 Fe12    | ?            |
| Sum formula            | Al39 Fe12    | Al3.25 Fe    |
| Mr                     | 1722.42      | 143.53       |
| Dx, g cm <sup>-3</sup> | 3.841        | 3.841        |
| Z                      | 2            | 24           |
| Mu (mm <sup>-1</sup> ) | 6.823        | 6.824        |
| F000                   | 1638.0       | 1638.0       |
| F000'                  | 1650.80      |              |
| h, k, lmax             | 20, 10, 16   | 18, 9, 16    |
| Nref                   | 1847         | 1423         |
| Tmin, Tmax             | 0.618, 0.664 | 0.552, 0.746 |
| Tmin'                  | 0.500        |              |

Correction method= # Reported T Limits: Tmin=0.552 Tmax=0.746  
AbsCorr = MULTI-SCAN

Data completeness= 0.770                      Theta (max)= 27.536

```
R(reflections)= 0.0803( 756)          wR2(reflections)=
S = 1.064                               0.2230( 1423)
Npar= 128
```

---

The following ALERTS were generated. Each ALERT has the format

**test-name\_ALERT\_alert-type\_alert-level.**

Click on the hyperlinks for more details of the test.

---

#### Alert level A

PLAT029\_ALERT\_3\_A \_diffn\_measured\_fraction\_theta\_full value Low . 0.820 Why?

**Author Response: The high angle diffraction data are not very good.**

---

#### Alert level B

PLAT911\_ALERT\_3\_B Missing FCF Refl Between Thmin & STh/L= 0.600 260 Report

|     |   |    |     |   |    |     |   |    |     |   |    |     |   |    |     |   |    |
|-----|---|----|-----|---|----|-----|---|----|-----|---|----|-----|---|----|-----|---|----|
| 0   | 8 | 0, | 1   | 9 | 0, | 3   | 9 | 0, | 8   | 4 | 0, | 9   | 3 | 0, | 10  | 0 | 0, |
| 10  | 2 | 0, | 10  | 4 | 0, | 11  | 1 | 0, | 11  | 3 | 0, | 12  | 0 | 0, | 12  | 2 | 0, |
| 12  | 4 | 0, | 13  | 1 | 0, | 13  | 3 | 0, | 14  | 0 | 0, | 14  | 2 | 0, | 14  | 4 | 0, |
| 15  | 1 | 0, | 15  | 3 | 0, | 16  | 0 | 0, | 16  | 2 | 0, | 16  | 4 | 0, | 17  | 1 | 0, |
| -18 | 0 | 1, | -17 | 1 | 1, | -17 | 3 | 1, | -16 | 0 | 1, | -16 | 2 | 1, | -16 | 4 | 1, |
| -15 | 1 | 1, | -15 | 3 | 1, | -15 | 5 | 1, | -14 | 0 | 1, | -14 | 2 | 1, | -14 | 4 | 1, |
| -13 | 1 | 1, | -13 | 3 | 1, | -12 | 0 | 1, | -12 | 2 | 1, | -12 | 4 | 1, | -11 | 1 | 1, |
| -11 | 3 | 1, | -10 | 2 | 1, | -10 | 4 | 1, | -10 | 8 | 1, | -9  | 3 | 1, | -5  | 9 | 1, |
| -3  | 9 | 1, | -2  | 8 | 1, | -1  | 7 | 1, | -1  | 9 | 1, | 0   | 8 | 1, | 1   | 9 | 1, |
| 9   | 3 | 1, | 10  | 0 | 1, | 10  | 2 | 1, | 11  | 1 | 1, | 11  | 3 | 1, | 12  | 0 | 1, |
| 12  | 2 | 1, | 13  | 1 | 1, | 13  | 3 | 1, | 14  | 0 | 1, | 14  | 2 | 1, | 15  | 1 | 1, |
| 15  | 3 | 1, | 16  | 0 | 1, | 16  | 2 | 1, | 17  | 1 | 1, | -18 | 0 | 2, | -17 | 1 | 2, |
| -17 | 3 | 2, | -16 | 0 | 2, | -16 | 2 | 2, | -16 | 4 | 2, | -15 | 1 | 2, | -15 | 3 | 2, |
| -15 | 5 | 2, | -14 | 0 | 2, | -14 | 2 | 2, | -14 | 4 | 2, | -14 | 6 | 2, | -13 | 1 | 2, |
| -13 | 3 | 2, | -12 | 0 | 2, | -12 | 2 | 2, | -12 | 4 | 2, | -11 | 1 | 2, | -11 | 3 | 2, |
| -10 | 2 | 2, | -9  | 3 | 2, | -7  | 5 | 2, | -5  | 9 | 2, | -3  | 9 | 2, | -2  | 6 | 2, |

**Author Response: The missing FCF Refl(ections) Between Thmin & STh/L = 0.600 260 are caused by the poor high angle diffraction data, actually it has been checked manually that the above listed 260 reflection are too weak to be integrated and included in the solving and refining the structural model.**

---

#### Alert level C

CRYSC01\_ALERT\_1\_C The word below has not been recognised as a standard identifier.

gray

CRYSC01\_ALERT\_1\_C No recognised colour has been given for crystal colour.

DIFMN02\_ALERT\_2\_C The minimum difference density is < -0.1\*ZMAX\*0.75

\_refine\_diff\_density\_min given = -2.043

Test value = -1.950

DIFMN03\_ALERT\_1\_C The minimum difference density is < -0.1\*ZMAX\*0.75

The relevant atom site should be identified.

PLAT098\_ALERT\_2\_C Large Reported Min. (Negative) Residual Density -2.04 eA-3

PLAT213\_ALERT\_2\_C Atom Fe2 has ADP max/min Ratio ..... 3.4 prolat

PLAT213\_ALERT\_2\_C Atom Al15 has ADP max/min Ratio ..... 4.0 prolat

PLAT250\_ALERT\_2\_C Large U3/U1 Ratio for <U(i,j)> Tensor(Resd 1) 3.0 Note

|                   |                                                 |       |       |
|-------------------|-------------------------------------------------|-------|-------|
| PLAT906_ALERT_3_C | Large K Value in the Analysis of Variance ..... | 8.892 | Check |
| PLAT971_ALERT_2_C | Check Calcd Resid. Dens. 1.24Ang From Al6       | 2.05  | eA-3  |
| PLAT971_ALERT_2_C | Check Calcd Resid. Dens. 1.87Ang From Al12      | 1.75  | eA-3  |
| PLAT971_ALERT_2_C | Check Calcd Resid. Dens. 1.20Ang From Al1       | 1.72  | eA-3  |
| PLAT971_ALERT_2_C | Check Calcd Resid. Dens. 0.47Ang From Al6       | 1.53  | eA-3  |
| PLAT972_ALERT_2_C | Check Calcd Resid. Dens. 1.20Ang From Fe4       | -2.19 | eA-3  |
| PLAT972_ALERT_2_C | Check Calcd Resid. Dens. 0.90Ang From Al3       | -2.00 | eA-3  |
| PLAT972_ALERT_2_C | Check Calcd Resid. Dens. 0.60Ang From Al2       | -1.91 | eA-3  |
| PLAT972_ALERT_2_C | Check Calcd Resid. Dens. 0.71Ang From Fe4       | -1.84 | eA-3  |
| PLAT972_ALERT_2_C | Check Calcd Resid. Dens. 1.39Ang From Al8       | -1.77 | eA-3  |
| PLAT972_ALERT_2_C | Check Calcd Resid. Dens. 0.81Ang From Al4       | -1.67 | eA-3  |
| PLAT972_ALERT_2_C | Check Calcd Resid. Dens. 1.14Ang From Al3       | -1.64 | eA-3  |
| PLAT972_ALERT_2_C | Check Calcd Resid. Dens. 0.54Ang From Al6       | -1.59 | eA-3  |
| PLAT972_ALERT_2_C | Check Calcd Resid. Dens. 0.99Ang From Fe1       | -1.59 | eA-3  |
| PLAT972_ALERT_2_C | Check Calcd Resid. Dens. 1.43Ang From Al2       | -1.55 | eA-3  |
| PLAT972_ALERT_2_C | Check Calcd Resid. Dens. 1.68Ang From Al13      | -1.53 | eA-3  |
| PLAT973_ALERT_2_C | Check Calcd Positive Resid. Density on Fe2      | 1.35  | eA-3  |

### ● Alert level G

|                   |                                                            |        |        |
|-------------------|------------------------------------------------------------|--------|--------|
| PLAT003_ALERT_2_G | Number of Uiso or Uij Restrained non-H Atoms ...           | 20     | Report |
| PLAT004_ALERT_5_G | Polymeric Structure Found with Maximum Dimension           | 3      | Info   |
| PLAT045_ALERT_1_G | Calculated and Reported Z Differ by a Factor ...           | 0.083  | Check  |
| PLAT171_ALERT_4_G | The CIF-Embedded .res File Contains EADP Records           | 1      | Report |
| PLAT177_ALERT_4_G | The CIF-Embedded .res File Contains DELU Records           | 1      | Report |
| PLAT186_ALERT_4_G | The CIF-Embedded .res File Contains ISOR Records           | 1      | Report |
| PLAT860_ALERT_3_G | Number of Least-Squares Restraints .....                   | 104    | Note   |
| PLAT883_ALERT_1_G | No Info/Value for _atom_sites_solution_primary .           | Please | Do !   |
| PLAT910_ALERT_3_G | Missing # of FCF Reflection(s) Below Theta(Min).<br>0 0 1, | 1      | Note   |
| PLAT912_ALERT_4_G | Missing # of FCF Reflections Above STh/L= 0.600            | 119    | Note   |
| PLAT941_ALERT_3_G | Average HKL Measurement Multiplicity .....                 | 2.8    | Low    |
| PLAT950_ALERT_5_G | Calculated (ThMax) and CIF-Reported Hmax Differ            | 2      | Units  |
| PLAT956_ALERT_1_G | Calculated (ThMax) and Actual (FCF) Hmax Differ            | 2      | Units  |
| PLAT969_ALERT_5_G | The 'Henn et al.' R-Factor-gap value .....                 | 1.66   | Note   |

Predicted wR2: Based on SigI\*\*2 13.43 or SHELX Weight 21.96

- 
- 1 **ALERT level A** = Most likely a serious problem - resolve or explain  
 1 **ALERT level B** = A potentially serious problem, consider carefully  
 25 **ALERT level C** = Check. Ensure it is not caused by an omission or oversight  
 14 **ALERT level G** = General information/check it is not something unexpected

- 6 ALERT type 1 CIF construction/syntax error, inconsistent or missing data  
 22 ALERT type 2 Indicator that the structure model may be wrong or deficient  
 6 ALERT type 3 Indicator that the structure quality may be low  
 4 ALERT type 4 Improvement, methodology, query or suggestion  
 3 ALERT type 5 Informative message, check
-

It is advisable to attempt to resolve as many as possible of the alerts in all categories. Often the minor alerts point to easily fixed oversights, errors and omissions in your CIF or refinement strategy, so attention to these fine details can be worthwhile. In order to resolve some of the more serious problems it may be necessary to carry out additional measurements or structure refinements. However, the purpose of your study may justify the reported deviations and the more serious of these should normally be commented upon in the discussion or experimental section of a paper or in the "special\_details" fields of the CIF. checkCIF was carefully designed to identify outliers and unusual parameters, but every test has its limitations and alerts that are not important in a particular case may appear. Conversely, the absence of alerts does not guarantee there are no aspects of the results needing attention. It is up to the individual to critically assess their own results and, if necessary, seek expert advice.

### **Publication of your CIF in IUCr journals**

A basic structural check has been run on your CIF. These basic checks will be run on all CIFs submitted for publication in IUCr journals (*Acta Crystallographica*, *Journal of Applied Crystallography*, *Journal of Synchrotron Radiation*); however, if you intend to submit to *Acta Crystallographica Section C* or *E* or *IUCrData*, you should make sure that full publication checks are run on the final version of your CIF prior to submission.

### **Publication of your CIF in other journals**

Please refer to the *Notes for Authors* of the relevant journal for any special instructions relating to CIF submission.

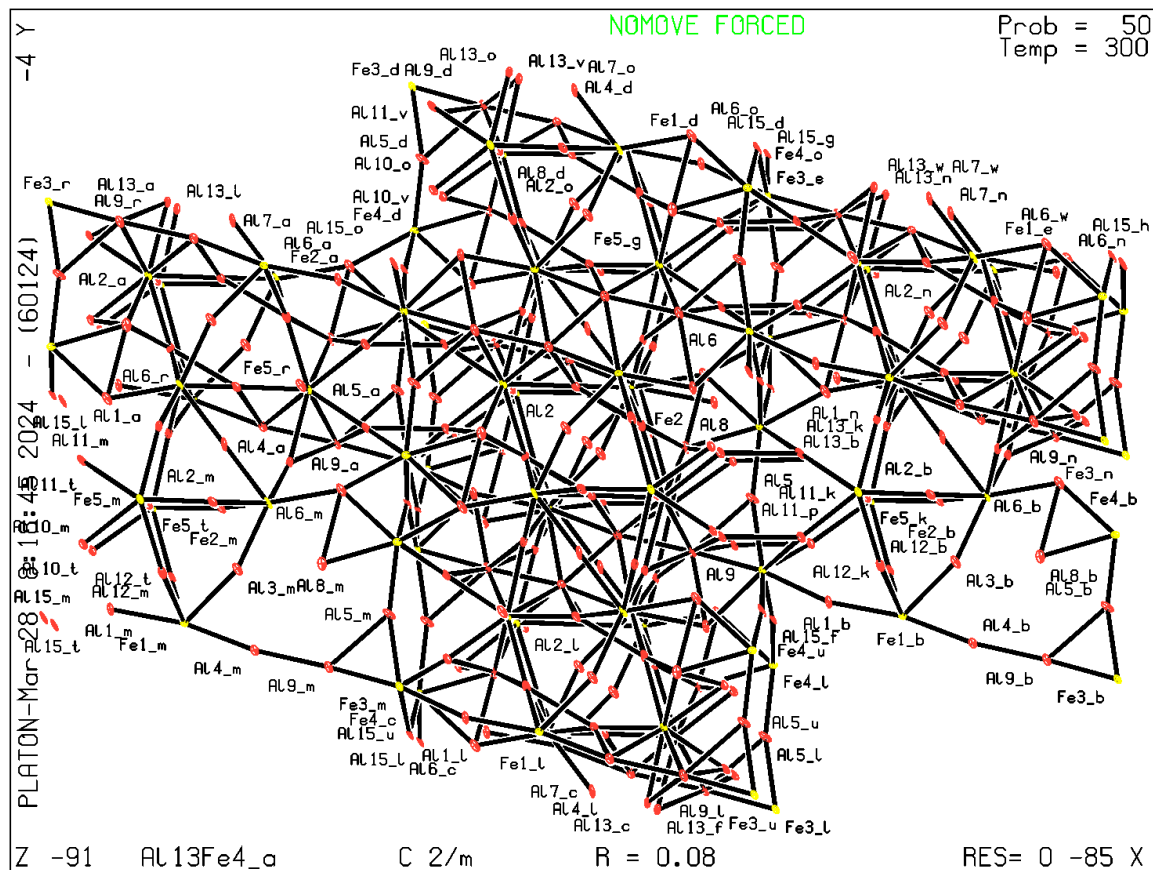

Supplement: s1 [file s1]
