# Supplementary material for: Orientation Relationship of the Intergrowth Al13Fe3 and Al13Fe4 Intermetallics Determined by Single-Crystal X-ray Diffraction
Source: MDPI journal article supplement (doi:10.3390/met14040463), 2024-04-15
Supplement: s1 [file s1]

Archive with 7 entries (7 files):
- Al13Fe3 checkcif.pdf
- Al13Fe3 crystallographic information.pdf
- Al13Fe3.cif
- Al13Fe4 checkcif.pdf
- Al13Fe4 crystallographic information.pdf
- Al13Fe4.cif
- metals-2922267-SM.pdf
