# Supplementary material for: Orientation Relationship of the Intergrowth Al13Fe3 and Al13Fe4 Intermetallics Determined by Single-Crystal X-ray Diffraction
Source: MDPI journal article supplement (doi:10.3390/met14040463), 2024-04-15
Supplement: s1 [file s1 › Al13Fe3 crystallographic information.pdf]

## Abstract

Table 1

Experimental details

|                                                                               |                                                                                      |
|-------------------------------------------------------------------------------|--------------------------------------------------------------------------------------|
| Crystal data                                                                  |                                                                                      |
| Chemical formula                                                              | Al <sub>78</sub> Fe <sub>18</sub>                                                    |
| $M_r$                                                                         | 3109.74                                                                              |
| Crystal system, space group                                                   | Trigonal, $R\bar{3}c:H$                                                              |
| Temperature (K)                                                               | 300                                                                                  |
| $a, c$ (Å)                                                                    | 14.5956 (9), 7.6929 (4)                                                              |
| $V$ (Å <sup>3</sup> )                                                         | 1419.27 (19)                                                                         |
| $Z$                                                                           | 1                                                                                    |
| Radiation type                                                                | Mo $K\alpha$                                                                         |
| $\mu$ (mm <sup>-1</sup> )                                                     | 5.69                                                                                 |
| Crystal size (mm)                                                             | 0.10 × 0.06 × 0.06                                                                   |
| Data collection                                                               |                                                                                      |
| Diffractometer                                                                | Bruker D8 Venture Photon 100 CMOS                                                    |
| Absorption correction                                                         | Multi-scan<br>( <i>SADABS</i> ; Krause et al., 2015)                                 |
| $T_{\min}, T_{\max}$                                                          | 0.655, 0.746                                                                         |
| No. of measured, independent and<br>observed [ $I > 2\sigma(I)$ ] reflections | 19200, 367, 341                                                                      |
| $R_{\text{int}}$                                                              | 0.077                                                                                |
| $(\sin \theta/\lambda)_{\text{max}}$ (Å <sup>-1</sup> )                       | 0.650                                                                                |
| Refinement                                                                    |                                                                                      |
| $R[F^2 > 2\sigma(F^2)], wR(F^2), S$                                           | 0.033, 0.071, 1.33                                                                   |
| No. of reflections                                                            | 367                                                                                  |
| No. of parameters                                                             | 28                                                                                   |
|                                                                               | $w = 1/[\sigma^2(F_o^2) + (0.0136P)^2 + 27.4348P]$<br>where $P = (F_o^2 + 2F_c^2)/3$ |
| $\Delta\rho_{\text{max}}, \Delta\rho_{\text{min}}$ (e Å <sup>-3</sup> )       | 0.52, -0.71                                                                          |

Computer programs: *SHELXL2019/1* (Sheldrick, 2019).

## References

NOT FOUND

## full crystallographic data

## Computing details

Program(s) used to refine structure: *SHELXL2019/1* (Sheldrick, 2019).

## (Al13Fe3)

## Crystal data

|                                   |                                                         |
|-----------------------------------|---------------------------------------------------------|
| Al <sub>78</sub> Fe <sub>18</sub> | $D_x = 3.638 \text{ Mg m}^{-3}$                         |
| $M_r = 3109.74$                   | Mo $K\alpha$ radiation, $\lambda = 0.71073 \text{ \AA}$ |
| Trigonal, $R\bar{3}c:H$           | Cell parameters from 5370 reflections                   |
| $a = 14.5956(9) \text{ \AA}$      | $\theta = 4.8\text{--}27.3^\circ$                       |
| $c = 7.6929(4) \text{ \AA}$       | $\mu = 5.69 \text{ mm}^{-1}$                            |
| $V = 1419.27(19) \text{ \AA}^3$   | $T = 300 \text{ K}$                                     |
| $Z = 1$                           | Lump, gray                                              |
| $F(000) = 1482$                   | $0.10 \times 0.06 \times 0.06 \text{ mm}$               |

## Data collection

|                                                                             |                                                                        |
|-----------------------------------------------------------------------------|------------------------------------------------------------------------|
| Bruker D8 Venture Photon 100 CMOS<br>diffractometer                         | 367 independent reflections                                            |
| phi and $\omega$ scans                                                      | 341 reflections with $I > 2\sigma(I)$                                  |
| Absorption correction: multi-scan<br>( <i>SADABS</i> ; Krause et al., 2015) | $R_{\text{int}} = 0.077$                                               |
| $T_{\text{min}} = 0.655$ , $T_{\text{max}} = 0.746$                         | $\theta_{\text{max}} = 27.5^\circ$ , $\theta_{\text{min}} = 2.8^\circ$ |
| 19200 measured reflections                                                  | $h = -18 \rightarrow 18$                                               |
|                                                                             | $k = -18 \rightarrow 18$                                               |
|                                                                             | $l = -9 \rightarrow 9$                                                 |

## Refinement

|                                 |                                                      |
|---------------------------------|------------------------------------------------------|
| Refinement on $F^2$             | 0 restraints                                         |
| Least-squares matrix: full      | $w = 1/[\sigma^2(F_o^2) + (0.0136P)^2 + 27.4348P]$   |
| $R[F^2 > 2\sigma(F^2)] = 0.033$ | where $P = (F_o^2 + 2F_c^2)/3$                       |
| $wR(F^2) = 0.071$               | $(\Delta/\sigma)_{\text{max}} < 0.001$               |
| $S = 1.33$                      | $\Delta\rho_{\text{max}} = 0.52 \text{ e \AA}^{-3}$  |
| 367 reflections                 | $\Delta\rho_{\text{min}} = -0.71 \text{ e \AA}^{-3}$ |
| 28 parameters                   |                                                      |

## Special details

*Geometry.* All esds (except the esd in the dihedral angle between two l.s. planes) are estimated using the full covariance matrix. The cell esds are taken into account individually in the estimation of esds in distances, angles and torsion angles; correlations between esds in cell parameters are only used when they are defined by crystal symmetry. An approximate (isotropic) treatment of cell esds is used for estimating esds involving l.s. planes.

Fractional atomic coordinates and isotropic or equivalent isotropic displacement parameters ( $\text{\AA}^2$ ) for (Al13Fe3)

|     | <i>x</i>     | <i>y</i>     | <i>z</i>     | $U_{\text{iso}}^*/U_{\text{eq}}$ |
|-----|--------------|--------------|--------------|----------------------------------|
| Fe1 | 0.333333     | 0.49355 (6)  | 0.416667     | 0.0061 (2)                       |
| Al1 | 0.35988 (13) | 0.35988 (13) | 0.250000     | 0.0110 (4)                       |
| Al2 | 0.333333     | 0.666667     | 0.416667     | 0.0180 (8)                       |
| Al3 | 0.48065 (11) | 0.63616 (12) | 0.24732 (18) | 0.0188 (4)                       |
| Al4 | 0.166667     | 0.333333     | 0.333333     | 0.0183 (5)                       |

*Atomic displacement parameters ( $\text{\AA}^2$ ) for (Al13Fe3)*

|     | $U^{11}$    | $U^{22}$    | $U^{33}$    | $U^{12}$    | $U^{13}$    | $U^{23}$     |
|-----|-------------|-------------|-------------|-------------|-------------|--------------|
| Fe1 | 0.0066 (4)  | 0.0062 (3)  | 0.0056 (4)  | 0.0033 (2)  | 0.0014 (3)  | 0.00069 (14) |
| Al1 | 0.0167 (7)  | 0.0167 (7)  | 0.0072 (9)  | 0.0142 (8)  | 0.0011 (3)  | −0.0011 (3)  |
| Al2 | 0.0085 (10) | 0.0085 (10) | 0.037 (2)   | 0.0042 (5)  | 0.000       | 0.000        |
| Al3 | 0.0165 (8)  | 0.0167 (7)  | 0.0108 (7)  | −0.0009 (6) | 0.0058 (5)  | 0.0001 (5)   |
| Al4 | 0.0078 (9)  | 0.0082 (9)  | 0.0356 (12) | 0.0016 (8)  | −0.0039 (8) | 0.0012 (8)   |

*Geometric parameters ( $\text{\AA}$ ,  $^\circ$ ) for (Al13Fe3)*

|                                          |              |                                             |             |
|------------------------------------------|--------------|---------------------------------------------|-------------|
| Fe1—Al4                                  | 2.4715 (4)   | Al1—Al4 <sup>i</sup>                        | 2.8074 (14) |
| Fe1—Al4 <sup>i</sup>                     | 2.4715 (4)   | Al1—Al4 <sup>v</sup>                        | 2.8074 (14) |
| Fe1—Al3                                  | 2.4855 (14)  | Al2—Al3 <sup>viii</sup>                     | 2.7342 (15) |
| Fe1—Al3 <sup>i</sup>                     | 2.4855 (14)  | Al2—Al3 <sup>ix</sup>                       | 2.7342 (15) |
| Fe1—Al1 <sup>ii</sup>                    | 2.5211 (9)   | Al2—Al3 <sup>x</sup>                        | 2.7342 (15) |
| Fe1—Al1                                  | 2.5211 (9)   | Al2—Al3 <sup>i</sup>                        | 2.7342 (15) |
| Fe1—Al2                                  | 2.5268 (8)   | Al2—Al3                                     | 2.7343 (15) |
| Fe1—Al3 <sup>iii</sup>                   | 2.5774 (14)  | Al2—Al3 <sup>xi</sup>                       | 2.7343 (15) |
| Fe1—Al3 <sup>iv</sup>                    | 2.5774 (14)  | Al3—Al3 <sup>iii</sup>                      | 2.705 (2)   |
| Al1—Al1 <sup>v</sup>                     | 2.6507 (9)   | Al3—Al3 <sup>xii</sup>                      | 2.705 (2)   |
| Al1—Al1 <sup>ii</sup>                    | 2.6507 (9)   | Al3—Al3 <sup>viii</sup>                     | 2.717 (3)   |
| Al1—Al3 <sup>vi</sup>                    | 2.7195 (15)  | Al3—Al4 <sup>v</sup>                        | 2.8654 (15) |
| Al1—Al3 <sup>iii</sup>                   | 2.7195 (15)  | Al3—Al4 <sup>ix</sup>                       | 2.8771 (14) |
| Al1—Al4                                  | 2.7242 (12)  | Al3—Al4 <sup>i</sup>                        | 2.8929 (16) |
| Al1—Al4 <sup>vii</sup>                   | 2.7243 (12)  |                                             |             |
| Al4—Fe1—Al4 <sup>i</sup>                 | 126.00 (3)   | Al3 <sup>x</sup> —Al2—Al3 <sup>xi</sup>     | 112.44 (6)  |
| Al4—Fe1—Al3                              | 133.35 (3)   | Al3 <sup>i</sup> —Al2—Al3 <sup>xi</sup>     | 99.18 (4)   |
| Al4 <sup>i</sup> —Fe1—Al3                | 71.41 (4)    | Al3—Al2—Al3 <sup>xi</sup>                   | 143.67 (6)  |
| Al4—Fe1—Al3 <sup>i</sup>                 | 71.41 (4)    | Fe1—Al3—Fe1 <sup>xii</sup>                  | 130.73 (6)  |
| Al4 <sup>i</sup> —Fe1—Al3 <sup>i</sup>   | 133.35 (3)   | Fe1—Al3—Al3 <sup>iii</sup>                  | 59.36 (4)   |
| Al3—Fe1—Al3 <sup>i</sup>                 | 132.23 (8)   | Fe1 <sup>xii</sup> —Al3—Al3 <sup>iii</sup>  | 71.57 (7)   |
| Al4—Fe1—Al1 <sup>ii</sup>                | 68.42 (3)    | Fe1—Al3—Al3 <sup>xii</sup>                  | 134.62 (5)  |
| Al4 <sup>i</sup> —Fe1—Al1 <sup>ii</sup>  | 66.13 (4)    | Fe1 <sup>xii</sup> —Al3—Al3 <sup>xii</sup>  | 56.07 (6)   |
| Al3—Fe1—Al1 <sup>ii</sup>                | 135.30 (6)   | Al3 <sup>iii</sup> —Al3—Al3 <sup>xii</sup>  | 100.62 (7)  |
| Al3 <sup>i</sup> —Fe1—Al1 <sup>ii</sup>  | 88.75 (5)    | Fe1—Al3—Al3 <sup>viii</sup>                 | 72.74 (6)   |
| Al4—Fe1—Al1                              | 66.13 (4)    | Fe1 <sup>xii</sup> —Al3—Al3 <sup>viii</sup> | 154.67 (9)  |
| Al4 <sup>i</sup> —Fe1—Al1                | 68.42 (3)    | Al3 <sup>iii</sup> —Al3—Al3 <sup>viii</sup> | 129.43 (7)  |
| Al3—Fe1—Al1                              | 88.75 (5)    | Al3 <sup>xii</sup> —Al3—Al3 <sup>viii</sup> | 101.77 (7)  |
| Al3 <sup>i</sup> —Fe1—Al1                | 135.30 (6)   | Fe1—Al3—Al1 <sup>xii</sup>                  | 144.37 (8)  |
| Al1 <sup>ii</sup> —Fe1—Al1               | 63.43 (4)    | Fe1 <sup>xii</sup> —Al3—Al1 <sup>xii</sup>  | 56.77 (3)   |
| Al4—Fe1—Al2                              | 117.002 (17) | Al3 <sup>iii</sup> —Al3—Al1 <sup>xii</sup>  | 116.41 (8)  |
| Al4 <sup>i</sup> —Fe1—Al2                | 117.002 (17) | Al3 <sup>xii</sup> —Al3—Al1 <sup>xii</sup>  | 80.40 (7)   |
| Al3—Fe1—Al2                              | 66.11 (4)    | Al3 <sup>viii</sup> —Al3—Al1 <sup>xii</sup> | 111.69 (4)  |
| Al3 <sup>i</sup> —Fe1—Al2                | 66.11 (4)    | Fe1—Al3—Al2                                 | 57.67 (3)   |
| Al1 <sup>ii</sup> —Fe1—Al2               | 148.28 (2)   | Fe1 <sup>xii</sup> —Al3—Al2                 | 120.06 (6)  |
| Al1—Fe1—Al2                              | 148.29 (2)   | Al3 <sup>iii</sup> —Al3—Al2                 | 80.09 (3)   |
| Al4—Fe1—Al3 <sup>iii</sup>               | 69.12 (4)    | Al3 <sup>xii</sup> —Al3—Al2                 | 80.09 (3)   |
| Al4 <sup>i</sup> —Fe1—Al3 <sup>iii</sup> | 114.25 (3)   | Al3 <sup>viii</sup> —Al3—Al2                | 60.20 (3)   |
| Al3—Fe1—Al3 <sup>iii</sup>               | 64.57 (4)    | Al1 <sup>xii</sup> —Al3—Al2                 | 156.51 (7)  |

|                                            |              |                                              |              |
|--------------------------------------------|--------------|----------------------------------------------|--------------|
| Al3 <sup>i</sup> —Fe1—Al3 <sup>iii</sup>   | 112.40 (3)   | Fe1—Al3—Al4 <sup>v</sup>                     | 96.38 (5)    |
| Al1 <sup>ii</sup> —Fe1—Al3 <sup>iii</sup>  | 122.20 (4)   | Fe1 <sup>xii</sup> —Al3—Al4 <sup>v</sup>     | 53.70 (3)    |
| Al1—Fe1—Al3 <sup>iii</sup>                 | 64.46 (4)    | Al3 <sup>iii</sup> —Al3—Al4 <sup>v</sup>     | 62.11 (6)    |
| Al2—Fe1—Al3 <sup>iii</sup>                 | 86.57 (4)    | Al3 <sup>xii</sup> —Al3—Al4 <sup>v</sup>     | 109.56 (8)   |
| Al4—Fe1—Al3 <sup>iv</sup>                  | 114.25 (3)   | Al3 <sup>viii</sup> —Al3—Al4 <sup>v</sup>    | 143.82 (6)   |
| Al4 <sup>i</sup> —Fe1—Al3 <sup>iv</sup>    | 69.12 (4)    | Al1 <sup>xii</sup> —Al3—Al4 <sup>v</sup>     | 58.32 (4)    |
| Al3—Fe1—Al3 <sup>iv</sup>                  | 112.40 (3)   | Al2—Al3—Al4 <sup>v</sup>                     | 141.96 (6)   |
| Al3 <sup>i</sup> —Fe1—Al3 <sup>iv</sup>    | 64.57 (4)    | Fe1—Al3—Al4 <sup>ix</sup>                    | 134.89 (6)   |
| Al1 <sup>ii</sup> —Fe1—Al3 <sup>iv</sup>   | 64.46 (4)    | Fe1 <sup>xii</sup> —Al3—Al4 <sup>ix</sup>    | 94.06 (4)    |
| Al1—Fe1—Al3 <sup>iv</sup>                  | 122.20 (4)   | Al3 <sup>iii</sup> —Al3—Al4 <sup>ix</sup>    | 161.99 (7)   |
| Al2—Fe1—Al3 <sup>iv</sup>                  | 86.58 (4)    | Al3 <sup>xii</sup> —Al3—Al4 <sup>ix</sup>    | 61.67 (5)    |
| Al3 <sup>iii</sup> —Fe1—Al3 <sup>iv</sup>  | 173.15 (8)   | Al3 <sup>viii</sup> —Al3—Al4 <sup>ix</sup>   | 62.20 (5)    |
| Fe1—Al1—Fe1 <sup>v</sup>                   | 143.87 (9)   | Al1 <sup>xii</sup> —Al3—Al4 <sup>ix</sup>    | 60.14 (4)    |
| Fe1—Al1—Al1 <sup>v</sup>                   | 131.43 (5)   | Al2—Al3—Al4 <sup>ix</sup>                    | 98.81 (5)    |
| Fe1 <sup>v</sup> —Al1—Al1 <sup>v</sup>     | 58.28 (2)    | Al4 <sup>v</sup> —Al3—Al4 <sup>ix</sup>      | 118.39 (5)   |
| Fe1—Al1—Al1 <sup>ii</sup>                  | 58.28 (2)    | Fe1—Al3—Al4 <sup>i</sup>                     | 54.07 (3)    |
| Fe1 <sup>v</sup> —Al1—Al1 <sup>ii</sup>    | 131.43 (5)   | Fe1 <sup>xii</sup> —Al3—Al4 <sup>i</sup>     | 136.54 (6)   |
| Al1 <sup>v</sup> —Al1—Al1 <sup>ii</sup>    | 154.67 (12)  | Al3 <sup>iii</sup> —Al3—Al4 <sup>i</sup>     | 98.43 (5)    |
| Fe1—Al1—Al3 <sup>vi</sup>                  | 113.50 (4)   | Al3 <sup>xii</sup> —Al3—Al4 <sup>i</sup>     | 160.30 (7)   |
| Fe1 <sup>v</sup> —Al1—Al3 <sup>vi</sup>    | 58.77 (3)    | Al3 <sup>viii</sup> —Al3—Al4 <sup>i</sup>    | 61.61 (5)    |
| Al1 <sup>v</sup> —Al1—Al3 <sup>vi</sup>    | 112.43 (5)   | Al1 <sup>xii</sup> —Al3—Al4 <sup>i</sup>     | 95.55 (6)    |
| Al1 <sup>ii</sup> —Al1—Al3 <sup>vi</sup>   | 72.72 (5)    | Al2—Al3—Al4 <sup>i</sup>                     | 98.43 (4)    |
| Fe1—Al1—Al3 <sup>iii</sup>                 | 58.77 (3)    | Al4 <sup>v</sup> —Al3—Al4 <sup>i</sup>       | 83.82 (4)    |
| Fe1 <sup>v</sup> —Al1—Al3 <sup>iii</sup>   | 113.50 (4)   | Al4 <sup>ix</sup> —Al3—Al4 <sup>i</sup>      | 99.51 (5)    |
| Al1 <sup>v</sup> —Al1—Al3 <sup>iii</sup>   | 72.72 (5)    | Fe1—Al4—Fe1 <sup>xiii</sup>                  | 180.00 (3)   |
| Al1 <sup>ii</sup> —Al1—Al3 <sup>iii</sup>  | 112.43 (5)   | Fe1—Al4—Al1 <sup>xiii</sup>                  | 122.19 (3)   |
| Al3 <sup>vi</sup> —Al1—Al3 <sup>iii</sup>  | 157.75 (10)  | Fe1 <sup>xiii</sup> —Al4—Al1 <sup>xiii</sup> | 57.81 (3)    |
| Fe1—Al1—Al4                                | 56.061 (10)  | Fe1—Al4—Al1                                  | 57.81 (3)    |
| Fe1 <sup>v</sup> —Al1—Al4                  | 157.43 (6)   | Fe1 <sup>xiii</sup> —Al4—Al1                 | 122.19 (3)   |
| Al1 <sup>v</sup> —Al1—Al4                  | 101.33 (3)   | Al1 <sup>xiii</sup> —Al4—Al1                 | 180.00 (2)   |
| Al1 <sup>ii</sup> —Al1—Al4                 | 62.96 (6)    | Fe1—Al4—Al1 <sup>ii</sup>                    | 56.627 (15)  |
| Al3 <sup>vi</sup> —Al1—Al4                 | 132.30 (5)   | Fe1 <sup>xiii</sup> —Al4—Al1 <sup>ii</sup>   | 123.373 (15) |
| Al3 <sup>iii</sup> —Al1—Al4                | 63.52 (3)    | Al1 <sup>xiii</sup> —Al4—Al1 <sup>ii</sup>   | 122.76 (3)   |
| Fe1—Al1—Al4 <sup>vii</sup>                 | 157.43 (6)   | Al1—Al4—Al1 <sup>ii</sup>                    | 57.24 (3)    |
| Fe1 <sup>v</sup> —Al1—Al4 <sup>vii</sup>   | 56.058 (9)   | Fe1—Al4—Al1 <sup>iii</sup>                   | 123.372 (15) |
| Al1 <sup>v</sup> —Al1—Al4 <sup>vii</sup>   | 62.96 (6)    | Fe1 <sup>xiii</sup> —Al4—Al1 <sup>iii</sup>  | 56.628 (15)  |
| Al1 <sup>ii</sup> —Al1—Al4 <sup>vii</sup>  | 101.33 (3)   | Al1 <sup>xiii</sup> —Al4—Al1 <sup>iii</sup>  | 57.24 (3)    |
| Al3 <sup>vi</sup> —Al1—Al4 <sup>vii</sup>  | 63.52 (3)    | Al1—Al4—Al1 <sup>iii</sup>                   | 122.76 (3)   |
| Al3 <sup>iii</sup> —Al1—Al4 <sup>vii</sup> | 132.30 (5)   | Al1 <sup>ii</sup> —Al4—Al1 <sup>iii</sup>    | 180.0        |
| Al4—Al1—Al4 <sup>vii</sup>                 | 107.87 (7)   | Fe1—Al4—Al3 <sup>iii</sup>                   | 57.18 (3)    |
| Fe1—Al1—Al4 <sup>i</sup>                   | 54.95 (2)    | Fe1 <sup>xiii</sup> —Al4—Al3 <sup>iii</sup>  | 122.82 (3)   |
| Fe1 <sup>v</sup> —Al1—Al4 <sup>i</sup>     | 97.04 (5)    | Al1 <sup>xiii</sup> —Al4—Al3 <sup>iii</sup>  | 121.84 (3)   |
| Al1 <sup>v</sup> —Al1—Al4 <sup>i</sup>     | 145.33 (8)   | Al1—Al4—Al3 <sup>iii</sup>                   | 58.16 (3)    |
| Al1 <sup>ii</sup> —Al1—Al4 <sup>i</sup>    | 59.80 (4)    | Al1 <sup>ii</sup> —Al4—Al3 <sup>iii</sup>    | 103.78 (3)   |
| Al3 <sup>vi</sup> —Al1—Al4 <sup>i</sup>    | 62.72 (4)    | Al1 <sup>iii</sup> —Al4—Al3 <sup>iii</sup>   | 76.22 (3)    |
| Al3 <sup>iii</sup> —Al1—Al4 <sup>i</sup>   | 100.21 (5)   | Fe1—Al4—Al3 <sup>ii</sup>                    | 122.82 (3)   |
| Al4—Al1—Al4 <sup>i</sup>                   | 105.525 (8)  | Fe1 <sup>xiii</sup> —Al4—Al3 <sup>ii</sup>   | 57.18 (3)    |
| Al4 <sup>vii</sup> —Al1—Al4 <sup>i</sup>   | 126.163 (12) | Al1 <sup>xiii</sup> —Al4—Al3 <sup>ii</sup>   | 58.16 (3)    |
| Fe1—Al1—Al4 <sup>v</sup>                   | 97.04 (5)    | Al1—Al4—Al3 <sup>ii</sup>                    | 121.84 (3)   |
| Fe1 <sup>v</sup> —Al1—Al4 <sup>v</sup>     | 54.95 (2)    | Al1 <sup>ii</sup> —Al4—Al3 <sup>ii</sup>     | 76.22 (3)    |
| Al1 <sup>v</sup> —Al1—Al4 <sup>v</sup>     | 59.80 (4)    | Al1 <sup>iii</sup> —Al4—Al3 <sup>ii</sup>    | 103.78 (3)   |

|                                            |              |                                             |            |
|--------------------------------------------|--------------|---------------------------------------------|------------|
| Al1 <sup>ii</sup> —Al1—Al4 <sup>v</sup>    | 145.33 (8)   | Al3 <sup>iii</sup> —Al4—Al3 <sup>ii</sup>   | 180.0      |
| Al3 <sup>vi</sup> —Al1—Al4 <sup>v</sup>    | 100.21 (5)   | Fe1—Al4—Al3 <sup>x</sup>                    | 70.13 (4)  |
| Al3 <sup>iii</sup> —Al1—Al4 <sup>v</sup>   | 62.72 (4)    | Fe1 <sup>xiii</sup> —Al4—Al3 <sup>x</sup>   | 109.87 (4) |
| Al4—Al1—Al4 <sup>v</sup>                   | 126.163 (12) | Al1 <sup>xiii</sup> —Al4—Al3 <sup>x</sup>   | 69.23 (5)  |
| Al4 <sup>vii</sup> —Al1—Al4 <sup>v</sup>   | 105.524 (9)  | Al1—Al4—Al3 <sup>x</sup>                    | 110.77 (5) |
| Al4 <sup>i</sup> —Al1—Al4 <sup>v</sup>     | 86.48 (6)    | Al1 <sup>ii</sup> —Al4—Al3 <sup>x</sup>     | 122.85 (3) |
| Fe1 <sup>x</sup> —Al2—Fe1 <sup>ix</sup>    | 120.0        | Al1 <sup>iii</sup> —Al4—Al3 <sup>x</sup>    | 57.14 (3)  |
| Fe1 <sup>x</sup> —Al2—Fe1                  | 120.0        | Al3 <sup>iii</sup> —Al4—Al3 <sup>x</sup>    | 56.21 (5)  |
| Fe1 <sup>ix</sup> —Al2—Fe1                 | 120.0        | Al3 <sup>ii</sup> —Al4—Al3 <sup>x</sup>     | 123.79 (5) |
| Fe1 <sup>x</sup> —Al2—Al3 <sup>viii</sup>  | 150.21 (3)   | Fe1—Al4—Al3 <sup>xiv</sup>                  | 109.87 (4) |
| Fe1 <sup>ix</sup> —Al2—Al3 <sup>viii</sup> | 56.22 (3)    | Fe1 <sup>xiii</sup> —Al4—Al3 <sup>xiv</sup> | 70.13 (4)  |
| Fe1—Al2—Al3 <sup>viii</sup>                | 71.83 (3)    | Al1 <sup>xiii</sup> —Al4—Al3 <sup>xiv</sup> | 110.77 (5) |
| Fe1 <sup>x</sup> —Al2—Al3 <sup>ix</sup>    | 71.83 (3)    | Al1—Al4—Al3 <sup>xiv</sup>                  | 69.23 (5)  |
| Fe1 <sup>ix</sup> —Al2—Al3 <sup>ix</sup>   | 56.22 (3)    | Al1 <sup>ii</sup> —Al4—Al3 <sup>xiv</sup>   | 57.15 (3)  |
| Fe1—Al2—Al3 <sup>ix</sup>                  | 150.21 (3)   | Al1 <sup>iii</sup> —Al4—Al3 <sup>xiv</sup>  | 122.86 (3) |
| Al3 <sup>viii</sup> —Al2—Al3 <sup>ix</sup> | 112.44 (6)   | Al3 <sup>iii</sup> —Al4—Al3 <sup>xiv</sup>  | 123.79 (5) |
| Fe1 <sup>x</sup> —Al2—Al3 <sup>x</sup>     | 56.22 (3)    | Al3 <sup>ii</sup> —Al4—Al3 <sup>xiv</sup>   | 56.21 (5)  |
| Fe1 <sup>ix</sup> —Al2—Al3 <sup>x</sup>    | 150.21 (3)   | Al3 <sup>x</sup> —Al4—Al3 <sup>xiv</sup>    | 180.0      |
| Fe1—Al2—Al3 <sup>x</sup>                   | 71.83 (3)    | Fe1—Al4—Al3 <sup>xv</sup>                   | 125.48 (3) |
| Al3 <sup>viii</sup> —Al2—Al3 <sup>x</sup>  | 143.67 (6)   | Fe1 <sup>xiii</sup> —Al4—Al3 <sup>xv</sup>  | 54.52 (3)  |
| Al3 <sup>ix</sup> —Al2—Al3 <sup>x</sup>    | 99.18 (4)    | Al1 <sup>xiii</sup> —Al4—Al3 <sup>xv</sup>  | 111.01 (4) |
| Fe1 <sup>x</sup> —Al2—Al3 <sup>i</sup>     | 71.83 (3)    | Al1—Al4—Al3 <sup>xv</sup>                   | 68.99 (4)  |
| Fe1 <sup>ix</sup> —Al2—Al3 <sup>i</sup>    | 150.21 (3)   | Al1 <sup>ii</sup> —Al4—Al3 <sup>xv</sup>    | 104.22 (3) |
| Fe1—Al2—Al3 <sup>i</sup>                   | 56.22 (3)    | Al1 <sup>iii</sup> —Al4—Al3 <sup>xv</sup>   | 75.78 (3)  |
| Al3 <sup>viii</sup> —Al2—Al3 <sup>i</sup>  | 99.18 (4)    | Al3 <sup>iii</sup> —Al4—Al3 <sup>xv</sup>   | 86.12 (5)  |
| Al3 <sup>ix</sup> —Al2—Al3 <sup>i</sup>    | 143.67 (6)   | Al3 <sup>ii</sup> —Al4—Al3 <sup>xv</sup>    | 93.88 (5)  |
| Al3 <sup>x</sup> —Al2—Al3 <sup>i</sup>     | 59.59 (6)    | Al3 <sup>x</sup> —Al4—Al3 <sup>xv</sup>     | 123.81 (5) |
| Fe1 <sup>x</sup> —Al2—Al3                  | 150.20 (3)   | Al3 <sup>xiv</sup> —Al4—Al3 <sup>xv</sup>   | 56.19 (5)  |
| Fe1 <sup>ix</sup> —Al2—Al3                 | 71.83 (3)    | Fe1—Al4—Al3 <sup>i</sup>                    | 54.52 (3)  |
| Fe1—Al2—Al3                                | 56.22 (3)    | Fe1 <sup>xiii</sup> —Al4—Al3 <sup>i</sup>   | 125.48 (3) |
| Al3 <sup>viii</sup> —Al2—Al3               | 59.59 (6)    | Al1 <sup>xiii</sup> —Al4—Al3 <sup>i</sup>   | 68.99 (4)  |
| Al3 <sup>ix</sup> —Al2—Al3                 | 99.18 (4)    | Al1—Al4—Al3 <sup>i</sup>                    | 111.01 (4) |
| Al3 <sup>x</sup> —Al2—Al3                  | 99.18 (4)    | Al1 <sup>ii</sup> —Al4—Al3 <sup>i</sup>     | 75.78 (3)  |
| Al3 <sup>i</sup> —Al2—Al3                  | 112.44 (6)   | Al1 <sup>iii</sup> —Al4—Al3 <sup>i</sup>    | 104.22 (3) |
| Fe1 <sup>x</sup> —Al2—Al3 <sup>xi</sup>    | 56.22 (3)    | Al3 <sup>iii</sup> —Al4—Al3 <sup>i</sup>    | 93.88 (5)  |
| Fe1 <sup>ix</sup> —Al2—Al3 <sup>xi</sup>   | 71.84 (3)    | Al3 <sup>ii</sup> —Al4—Al3 <sup>i</sup>     | 86.12 (5)  |
| Fe1—Al2—Al3 <sup>xi</sup>                  | 150.21 (3)   | Al3 <sup>x</sup> —Al4—Al3 <sup>i</sup>      | 56.19 (5)  |
| Al3 <sup>viii</sup> —Al2—Al3 <sup>xi</sup> | 99.18 (4)    | Al3 <sup>xiv</sup> —Al4—Al3 <sup>i</sup>    | 123.81 (5) |
| Al3 <sup>ix</sup> —Al2—Al3 <sup>xi</sup>   | 59.59 (6)    | Al3 <sup>xv</sup> —Al4—Al3 <sup>i</sup>     | 180.0      |

Symmetry codes: (i)  $-x+2/3, -x+y+1/3, -z+5/6$ ; (ii)  $-y+2/3, x-y+1/3, z+1/3$ ; (iii)  $y-1/3, -x+y+1/3, -z+1/3$ ; (iv)  $-y+1, -x+1, z+1/2$ ; (v)  $-x+y+1/3, -x+2/3, z-1/3$ ; (vi)  $-x+y+1/3, y-1/3, z+1/6$ ; (vii)  $y, x, -z+1/2$ ; (viii)  $x-y+2/3, -y+4/3, -z+5/6$ ; (ix)  $-y+1, x-y+1, z$ ; (x)  $-x+y, -x+1, z$ ; (xi)  $y-1/3, x+1/3, -z+5/6$ ; (xii)  $x-y+2/3, x+1/3, -z+1/3$ ; (xiii)  $-x+1/3, -y+2/3, -z+2/3$ ; (xiv)  $x-y+1/3, x-1/3, -z+2/3$ ; (xv)  $x-1/3, x-y+1/3, z-1/6$ .
