# Supplementary material for: Orientation Relationship of the Intergrowth Al13Fe3 and Al13Fe4 Intermetallics Determined by Single-Crystal X-ray Diffraction
Source: MDPI journal article supplement (doi:10.3390/met14040463), 2024-04-15
Supplement: s1 [file s1 › Al13Fe3.cif]

data_Al13Fe3

_audit_update_record
;
2024-03-26 # Formatted by publCIF

;
_publcif_datablock.id '{2420c3af-d17b-4e4a-87a4-7f409bf03587}'

_publ_section_exptl_refinement
;
(type here to add)
;

_publ_section_exptl_prep
;
(type here to add)
;

_publ_manuscript_text
;
(type here to add)
;
 
_audit_creation_method            'SHELXL-2019/1'
_shelx_SHELXL_version_number      '2019/1'
_chemical_name_systematic         ?
_chemical_name_common             ?
_chemical_melting_point           ?
_chemical_formula_moiety          ?
_chemical_formula_sum
 'Al78 Fe18' 
_chemical_formula_weight          3109.74

loop_
 _atom_type_symbol
 _atom_type_description
 _atom_type_scat_dispersion_real
 _atom_type_scat_dispersion_imag
 _atom_type_scat_source
 'Al'  'Al'   0.0645   0.0514
 'International Tables Vol C Tables 4.2.6.8 and 6.1.1.4'
 'Fe'  'Fe'   0.3463   0.8444
 'International Tables Vol C Tables 4.2.6.8 and 6.1.1.4'
 
_space_group_crystal_system       trigonal
_space_group_IT_number            167
_space_group_name_H-M_alt         'R -3 c :H'
_space_group_name_Hall            '-R 3 2"c'
 
_shelx_space_group_comment
;
The symmetry employed for this shelxl refinement is uniquely defined
by the following loop, which should always be used as a source of
symmetry information in preference to the above space-group names.
They are only intended as comments.
;
 
loop_
 _space_group_symop_operation_xyz
 'x, y, z'
 '-y, x-y, z'
 '-x+y, -x, z'
 'y, x, -z+1/2'
 'x-y, -y, -z+1/2'
 '-x, -x+y, -z+1/2'
 'x+2/3, y+1/3, z+1/3'
 '-y+2/3, x-y+1/3, z+1/3'
 '-x+y+2/3, -x+1/3, z+1/3'
 'y+2/3, x+1/3, -z+5/6'
 'x-y+2/3, -y+1/3, -z+5/6'
 '-x+2/3, -x+y+1/3, -z+5/6'
 'x+1/3, y+2/3, z+2/3'
 '-y+1/3, x-y+2/3, z+2/3'
 '-x+y+1/3, -x+2/3, z+2/3'
 'y+1/3, x+2/3, -z+7/6'
 'x-y+1/3, -y+2/3, -z+7/6'
 '-x+1/3, -x+y+2/3, -z+7/6'
 '-x, -y, -z'
 'y, -x+y, -z'
 'x-y, x, -z'
 '-y, -x, z-1/2'
 '-x+y, y, z-1/2'
 'x, x-y, z-1/2'
 '-x+2/3, -y+1/3, -z+1/3'
 'y+2/3, -x+y+1/3, -z+1/3'
 'x-y+2/3, x+1/3, -z+1/3'
 '-y+2/3, -x+1/3, z-1/6'
 '-x+y+2/3, y+1/3, z-1/6'
 'x+2/3, x-y+1/3, z-1/6'
 '-x+1/3, -y+2/3, -z+2/3'
 'y+1/3, -x+y+2/3, -z+2/3'
 'x-y+1/3, x+2/3, -z+2/3'
 '-y+1/3, -x+2/3, z+1/6'
 '-x+y+1/3, y+2/3, z+1/6'
 'x+1/3, x-y+2/3, z+1/6'
 
_cell_length_a                    14.5956(9)
_cell_length_b                    14.5956(9)
_cell_length_c                    7.6929(4)
_cell_angle_alpha                 90
_cell_angle_beta                  90
_cell_angle_gamma                 120
_cell_volume                      1419.27(19)
_cell_formula_units_Z             1
_cell_measurement_temperature     300(2)
_cell_measurement_reflns_used     5370
_cell_measurement_theta_min       4.84
_cell_measurement_theta_max       27.33
 
_exptl_crystal_description        lump
_exptl_crystal_colour             gray
_exptl_crystal_density_meas       ?
_exptl_crystal_density_method     ?
_exptl_crystal_density_diffrn     3.638          
_exptl_crystal_F_000              1482
_exptl_transmission_factor_min    ?
_exptl_transmission_factor_max    ?
_exptl_crystal_size_max           0.10
_exptl_crystal_size_mid           0.06
_exptl_crystal_size_min           0.06
_exptl_absorpt_coefficient_mu     5.685
_shelx_estimated_absorpt_T_min    ?
_shelx_estimated_absorpt_T_max    ?
_exptl_absorpt_correction_type    multi-scan
_exptl_absorpt_correction_T_min   0.6545
_exptl_absorpt_correction_T_max   0.7456
_exptl_absorpt_process_details    '(SADABS; Krause et al., 2015)'
_diffrn_ambient_temperature       300(2)
_diffrn_radiation_wavelength      0.71073
_diffrn_radiation_type            MoK\a
_diffrn_source                    ?
_diffrn_measurement_device_type   'Bruker D8 Venture Photon 100 CMOS'
_diffrn_measurement_method        'phi and omega scans'
_diffrn_detector_area_resol_mean  ?
_diffrn_reflns_number             19200
_diffrn_reflns_av_unetI/netI      0.0152
_diffrn_reflns_av_R_equivalents   0.0766
_diffrn_reflns_limit_h_min        -18
_diffrn_reflns_limit_h_max        18
_diffrn_reflns_limit_k_min        -18
_diffrn_reflns_limit_k_max        18
_diffrn_reflns_limit_l_min        -9
_diffrn_reflns_limit_l_max        9
_diffrn_reflns_theta_min          2.791
_diffrn_reflns_theta_max          27.503
_diffrn_reflns_theta_full         25.242
_diffrn_measured_fraction_theta_max   1.000
_diffrn_measured_fraction_theta_full  1.000
_diffrn_reflns_Laue_measured_fraction_max    1.000
_diffrn_reflns_Laue_measured_fraction_full   1.000
_diffrn_reflns_point_group_measured_fraction_max   1.000
_diffrn_reflns_point_group_measured_fraction_full  1.000
_reflns_number_total              367
_reflns_number_gt                 341
_reflns_threshold_expression      'I > 2\s(I)'
_reflns_Friedel_coverage          0.000
_reflns_Friedel_fraction_max      .
_reflns_Friedel_fraction_full     .
 
_reflns_special_details
;
 Reflections were merged by SHELXL according to the crystal
 class for the calculation of statistics and refinement.
 
 _reflns_Friedel_fraction is defined as the number of unique
 Friedel pairs measured divided by the number that would be
 possible theoretically, ignoring centric projections and
 systematic absences.
;
 
_computing_data_collection        ?
_computing_cell_refinement        ?
_computing_data_reduction         ?
_computing_structure_solution     ?
_computing_structure_refinement 'SHELXL-2019/1 (Sheldrick, 2019)'
_computing_molecular_graphics     ?
_computing_publication_material   ?
_refine_special_details           ?
_refine_ls_structure_factor_coef  Fsqd
_refine_ls_matrix_type            full
_refine_ls_weighting_scheme       calc
_refine_ls_weighting_details
'w=1/[\s^2^(Fo^2^)+(0.0136P)^2^+27.4348P] where P=(Fo^2^+2Fc^2^)/3'
_atom_sites_solution_primary      ?
_atom_sites_solution_secondary    ?
_atom_sites_solution_hydrogens    .
_refine_ls_hydrogen_treatment     undef
_refine_ls_extinction_method      none
_refine_ls_extinction_coef        .
_refine_ls_number_reflns          367
_refine_ls_number_parameters      28
_refine_ls_number_restraints      0
_refine_ls_R_factor_all           0.0369
_refine_ls_R_factor_gt            0.0327
_refine_ls_wR_factor_ref          0.0710
_refine_ls_wR_factor_gt           0.0703
_refine_ls_goodness_of_fit_ref    1.326
_refine_ls_restrained_S_all       1.326
_refine_ls_shift/su_max           0.000
_refine_ls_shift/su_mean          0.000
 
loop_
 _atom_site_label
 _atom_site_type_symbol
 _atom_site_fract_x
 _atom_site_fract_y
 _atom_site_fract_z
 _atom_site_U_iso_or_equiv
 _atom_site_adp_type
 _atom_site_occupancy
 _atom_site_site_symmetry_order  
 _atom_site_calc_flag
 _atom_site_refinement_flags_posn
 _atom_site_refinement_flags_adp
 _atom_site_refinement_flags_occupancy
 _atom_site_disorder_assembly
 _atom_site_disorder_group
Fe1 Fe 0.333333 0.49355(6) 0.416667 0.0061(2) Uani 1 2 d S T P . .
Al1 Al 0.35988(13) 0.35988(13) 0.250000 0.0110(4) Uani 1 2 d S T P . .
Al2 Al 0.333333 0.666667 0.416667 0.0180(8) Uani 1 6 d S T P . .
Al3 Al 0.48065(11) 0.63616(12) 0.24732(18) 0.0188(4) Uani 1 1 d . . . . .
Al4 Al 0.166667 0.333333 0.333333 0.0183(5) Uani 1 2 d S . P . .
 
loop_
 _atom_site_aniso_label
 _atom_site_aniso_U_11
 _atom_site_aniso_U_22
 _atom_site_aniso_U_33
 _atom_site_aniso_U_23
 _atom_site_aniso_U_13
 _atom_site_aniso_U_12
Fe1 0.0066(4) 0.0062(3) 0.0056(4) 0.00069(14) 0.0014(3) 0.0033(2)
Al1 0.0167(7) 0.0167(7) 0.0072(9) -0.0011(3) 0.0011(3) 0.0142(8)
Al2 0.0085(10) 0.0085(10) 0.037(2) 0.000 0.000 0.0042(5)
Al3 0.0165(8) 0.0167(7) 0.0108(7) 0.0001(5) 0.0058(5) -0.0009(6)
Al4 0.0078(9) 0.0082(9) 0.0356(12) 0.0012(8) -0.0039(8) 0.0016(8)
 
_geom_special_details
;
 All esds (except the esd in the dihedral angle between two l.s. planes)
 are estimated using the full covariance matrix.  The cell esds are taken
 into account individually in the estimation of esds in distances, angles
 and torsion angles; correlations between esds in cell parameters are only
 used when they are defined by crystal symmetry.  An approximate (isotropic)
 treatment of cell esds is used for estimating esds involving l.s. planes.
;
 
loop_
 _geom_bond_atom_site_label_1
 _geom_bond_atom_site_label_2
 _geom_bond_distance
 _geom_bond_site_symmetry_2
 _geom_bond_publ_flag
Fe1 Al4 2.4715(4) . ?
Fe1 Al4 2.4715(4) 12 ?
Fe1 Al3 2.4855(14) . ?
Fe1 Al3 2.4855(14) 12 ?
Fe1 Al1 2.5211(9) 8 ?
Fe1 Al1 2.5211(9) . ?
Fe1 Al2 2.5268(8) . ?
Fe1 Al3 2.5774(14) 26_455 ?
Fe1 Al3 2.5774(14) 22_666 ?
Al1 Al1 2.6507(9) 15_554 ?
Al1 Al1 2.6507(9) 8 ?
Al1 Al3 2.7195(15) 35_545 ?
Al1 Al3 2.7195(15) 26_455 ?
Al1 Al4 2.7242(12) . ?
Al1 Al4 2.7243(12) 4 ?
Al1 Al4 2.8074(14) 12 ?
Al1 Al4 2.8074(14) 15_554 ?
Al2 Al3 2.7342(15) 11_565 ?
Al2 Al3 2.7342(15) 2_665 ?
Al2 Al3 2.7342(15) 3_565 ?
Al2 Al3 2.7342(15) 12 ?
Al2 Al3 2.7343(15) . ?
Al2 Al3 2.7343(15) 10_455 ?
Al3 Al3 2.705(2) 26_455 ?
Al3 Al3 2.705(2) 27 ?
Al3 Al3 2.717(3) 11_565 ?
Al3 Al4 2.8654(15) 15_554 ?
Al3 Al4 2.8771(14) 2_665 ?
Al3 Al4 2.8929(16) 12 ?
 
loop_
 _geom_angle_atom_site_label_1
 _geom_angle_atom_site_label_2
 _geom_angle_atom_site_label_3
 _geom_angle
 _geom_angle_site_symmetry_1
 _geom_angle_site_symmetry_3
 _geom_angle_publ_flag
Al4 Fe1 Al4 126.00(3) . 12 ?
Al4 Fe1 Al3 133.35(3) . . ?
Al4 Fe1 Al3 71.41(4) 12 . ?
Al4 Fe1 Al3 71.41(4) . 12 ?
Al4 Fe1 Al3 133.35(3) 12 12 ?
Al3 Fe1 Al3 132.23(8) . 12 ?
Al4 Fe1 Al1 68.42(3) . 8 ?
Al4 Fe1 Al1 66.13(4) 12 8 ?
Al3 Fe1 Al1 135.30(6) . 8 ?
Al3 Fe1 Al1 88.75(5) 12 8 ?
Al4 Fe1 Al1 66.13(4) . . ?
Al4 Fe1 Al1 68.42(3) 12 . ?
Al3 Fe1 Al1 88.75(5) . . ?
Al3 Fe1 Al1 135.30(6) 12 . ?
Al1 Fe1 Al1 63.43(4) 8 . ?
Al4 Fe1 Al2 117.002(17) . . ?
Al4 Fe1 Al2 117.002(17) 12 . ?
Al3 Fe1 Al2 66.11(4) . . ?
Al3 Fe1 Al2 66.11(4) 12 . ?
Al1 Fe1 Al2 148.28(2) 8 . ?
Al1 Fe1 Al2 148.29(2) . . ?
Al4 Fe1 Al3 69.12(4) . 26_455 ?
Al4 Fe1 Al3 114.25(3) 12 26_455 ?
Al3 Fe1 Al3 64.57(4) . 26_455 ?
Al3 Fe1 Al3 112.40(3) 12 26_455 ?
Al1 Fe1 Al3 122.20(4) 8 26_455 ?
Al1 Fe1 Al3 64.46(4) . 26_455 ?
Al2 Fe1 Al3 86.57(4) . 26_455 ?
Al4 Fe1 Al3 114.25(3) . 22_666 ?
Al4 Fe1 Al3 69.12(4) 12 22_666 ?
Al3 Fe1 Al3 112.40(3) . 22_666 ?
Al3 Fe1 Al3 64.57(4) 12 22_666 ?
Al1 Fe1 Al3 64.46(4) 8 22_666 ?
Al1 Fe1 Al3 122.20(4) . 22_666 ?
Al2 Fe1 Al3 86.58(4) . 22_666 ?
Al3 Fe1 Al3 173.15(8) 26_455 22_666 ?
Fe1 Al1 Fe1 143.87(9) . 15_554 ?
Fe1 Al1 Al1 131.43(5) . 15_554 ?
Fe1 Al1 Al1 58.28(2) 15_554 15_554 ?
Fe1 Al1 Al1 58.28(2) . 8 ?
Fe1 Al1 Al1 131.43(5) 15_554 8 ?
Al1 Al1 Al1 154.67(12) 15_554 8 ?
Fe1 Al1 Al3 113.50(4) . 35_545 ?
Fe1 Al1 Al3 58.77(3) 15_554 35_545 ?
Al1 Al1 Al3 112.43(5) 15_554 35_545 ?
Al1 Al1 Al3 72.72(5) 8 35_545 ?
Fe1 Al1 Al3 58.77(3) . 26_455 ?
Fe1 Al1 Al3 113.50(4) 15_554 26_455 ?
Al1 Al1 Al3 72.72(5) 15_554 26_455 ?
Al1 Al1 Al3 112.43(5) 8 26_455 ?
Al3 Al1 Al3 157.75(10) 35_545 26_455 ?
Fe1 Al1 Al4 56.061(10) . . ?
Fe1 Al1 Al4 157.43(6) 15_554 . ?
Al1 Al1 Al4 101.33(3) 15_554 . ?
Al1 Al1 Al4 62.96(6) 8 . ?
Al3 Al1 Al4 132.30(5) 35_545 . ?
Al3 Al1 Al4 63.52(3) 26_455 . ?
Fe1 Al1 Al4 157.43(6) . 4 ?
Fe1 Al1 Al4 56.058(9) 15_554 4 ?
Al1 Al1 Al4 62.96(6) 15_554 4 ?
Al1 Al1 Al4 101.33(3) 8 4 ?
Al3 Al1 Al4 63.52(3) 35_545 4 ?
Al3 Al1 Al4 132.30(5) 26_455 4 ?
Al4 Al1 Al4 107.87(7) . 4 ?
Fe1 Al1 Al4 54.95(2) . 12 ?
Fe1 Al1 Al4 97.04(5) 15_554 12 ?
Al1 Al1 Al4 145.33(8) 15_554 12 ?
Al1 Al1 Al4 59.80(4) 8 12 ?
Al3 Al1 Al4 62.72(4) 35_545 12 ?
Al3 Al1 Al4 100.21(5) 26_455 12 ?
Al4 Al1 Al4 105.525(8) . 12 ?
Al4 Al1 Al4 126.163(12) 4 12 ?
Fe1 Al1 Al4 97.04(5) . 15_554 ?
Fe1 Al1 Al4 54.95(2) 15_554 15_554 ?
Al1 Al1 Al4 59.80(4) 15_554 15_554 ?
Al1 Al1 Al4 145.33(8) 8 15_554 ?
Al3 Al1 Al4 100.21(5) 35_545 15_554 ?
Al3 Al1 Al4 62.72(4) 26_455 15_554 ?
Al4 Al1 Al4 126.163(12) . 15_554 ?
Al4 Al1 Al4 105.524(9) 4 15_554 ?
Al4 Al1 Al4 86.48(6) 12 15_554 ?
Fe1 Al2 Fe1 120.0 3_565 2_665 ?
Fe1 Al2 Fe1 120.0 3_565 . ?
Fe1 Al2 Fe1 120.0 2_665 . ?
Fe1 Al2 Al3 150.21(3) 3_565 11_565 ?
Fe1 Al2 Al3 56.22(3) 2_665 11_565 ?
Fe1 Al2 Al3 71.83(3) . 11_565 ?
Fe1 Al2 Al3 71.83(3) 3_565 2_665 ?
Fe1 Al2 Al3 56.22(3) 2_665 2_665 ?
Fe1 Al2 Al3 150.21(3) . 2_665 ?
Al3 Al2 Al3 112.44(6) 11_565 2_665 ?
Fe1 Al2 Al3 56.22(3) 3_565 3_565 ?
Fe1 Al2 Al3 150.21(3) 2_665 3_565 ?
Fe1 Al2 Al3 71.83(3) . 3_565 ?
Al3 Al2 Al3 143.67(6) 11_565 3_565 ?
Al3 Al2 Al3 99.18(4) 2_665 3_565 ?
Fe1 Al2 Al3 71.83(3) 3_565 12 ?
Fe1 Al2 Al3 150.21(3) 2_665 12 ?
Fe1 Al2 Al3 56.22(3) . 12 ?
Al3 Al2 Al3 99.18(4) 11_565 12 ?
Al3 Al2 Al3 143.67(6) 2_665 12 ?
Al3 Al2 Al3 59.59(6) 3_565 12 ?
Fe1 Al2 Al3 150.20(3) 3_565 . ?
Fe1 Al2 Al3 71.83(3) 2_665 . ?
Fe1 Al2 Al3 56.22(3) . . ?
Al3 Al2 Al3 59.59(6) 11_565 . ?
Al3 Al2 Al3 99.18(4) 2_665 . ?
Al3 Al2 Al3 99.18(4) 3_565 . ?
Al3 Al2 Al3 112.44(6) 12 . ?
Fe1 Al2 Al3 56.22(3) 3_565 10_455 ?
Fe1 Al2 Al3 71.84(3) 2_665 10_455 ?
Fe1 Al2 Al3 150.21(3) . 10_455 ?
Al3 Al2 Al3 99.18(4) 11_565 10_455 ?
Al3 Al2 Al3 59.59(6) 2_665 10_455 ?
Al3 Al2 Al3 112.44(6) 3_565 10_455 ?
Al3 Al2 Al3 99.18(4) 12 10_455 ?
Al3 Al2 Al3 143.67(6) . 10_455 ?
Fe1 Al3 Fe1 130.73(6) . 27 ?
Fe1 Al3 Al3 59.36(4) . 26_455 ?
Fe1 Al3 Al3 71.57(7) 27 26_455 ?
Fe1 Al3 Al3 134.62(5) . 27 ?
Fe1 Al3 Al3 56.07(6) 27 27 ?
Al3 Al3 Al3 100.62(7) 26_455 27 ?
Fe1 Al3 Al3 72.74(6) . 11_565 ?
Fe1 Al3 Al3 154.67(9) 27 11_565 ?
Al3 Al3 Al3 129.43(7) 26_455 11_565 ?
Al3 Al3 Al3 101.77(7) 27 11_565 ?
Fe1 Al3 Al1 144.37(8) . 27 ?
Fe1 Al3 Al1 56.77(3) 27 27 ?
Al3 Al3 Al1 116.41(8) 26_455 27 ?
Al3 Al3 Al1 80.40(7) 27 27 ?
Al3 Al3 Al1 111.69(4) 11_565 27 ?
Fe1 Al3 Al2 57.67(3) . . ?
Fe1 Al3 Al2 120.06(6) 27 . ?
Al3 Al3 Al2 80.09(3) 26_455 . ?
Al3 Al3 Al2 80.09(3) 27 . ?
Al3 Al3 Al2 60.20(3) 11_565 . ?
Al1 Al3 Al2 156.51(7) 27 . ?
Fe1 Al3 Al4 96.38(5) . 15_554 ?
Fe1 Al3 Al4 53.70(3) 27 15_554 ?
Al3 Al3 Al4 62.11(6) 26_455 15_554 ?
Al3 Al3 Al4 109.56(8) 27 15_554 ?
Al3 Al3 Al4 143.82(6) 11_565 15_554 ?
Al1 Al3 Al4 58.32(4) 27 15_554 ?
Al2 Al3 Al4 141.96(6) . 15_554 ?
Fe1 Al3 Al4 134.89(6) . 2_665 ?
Fe1 Al3 Al4 94.06(4) 27 2_665 ?
Al3 Al3 Al4 161.99(7) 26_455 2_665 ?
Al3 Al3 Al4 61.67(5) 27 2_665 ?
Al3 Al3 Al4 62.20(5) 11_565 2_665 ?
Al1 Al3 Al4 60.14(4) 27 2_665 ?
Al2 Al3 Al4 98.81(5) . 2_665 ?
Al4 Al3 Al4 118.39(5) 15_554 2_665 ?
Fe1 Al3 Al4 54.07(3) . 12 ?
Fe1 Al3 Al4 136.54(6) 27 12 ?
Al3 Al3 Al4 98.43(5) 26_455 12 ?
Al3 Al3 Al4 160.30(7) 27 12 ?
Al3 Al3 Al4 61.61(5) 11_565 12 ?
Al1 Al3 Al4 95.55(6) 27 12 ?
Al2 Al3 Al4 98.43(4) . 12 ?
Al4 Al3 Al4 83.82(4) 15_554 12 ?
Al4 Al3 Al4 99.51(5) 2_665 12 ?
Fe1 Al4 Fe1 180.00(3) . 31 ?
Fe1 Al4 Al1 122.19(3) . 31 ?
Fe1 Al4 Al1 57.81(3) 31 31 ?
Fe1 Al4 Al1 57.81(3) . . ?
Fe1 Al4 Al1 122.19(3) 31 . ?
Al1 Al4 Al1 180.00(2) 31 . ?
Fe1 Al4 Al1 56.627(15) . 8 ?
Fe1 Al4 Al1 123.373(15) 31 8 ?
Al1 Al4 Al1 122.76(3) 31 8 ?
Al1 Al4 Al1 57.24(3) . 8 ?
Fe1 Al4 Al1 123.372(15) . 26_455 ?
Fe1 Al4 Al1 56.628(15) 31 26_455 ?
Al1 Al4 Al1 57.24(3) 31 26_455 ?
Al1 Al4 Al1 122.76(3) . 26_455 ?
Al1 Al4 Al1 180.0 8 26_455 ?
Fe1 Al4 Al3 57.18(3) . 26_455 ?
Fe1 Al4 Al3 122.82(3) 31 26_455 ?
Al1 Al4 Al3 121.84(3) 31 26_455 ?
Al1 Al4 Al3 58.16(3) . 26_455 ?
Al1 Al4 Al3 103.78(3) 8 26_455 ?
Al1 Al4 Al3 76.22(3) 26_455 26_455 ?
Fe1 Al4 Al3 122.82(3) . 8 ?
Fe1 Al4 Al3 57.18(3) 31 8 ?
Al1 Al4 Al3 58.16(3) 31 8 ?
Al1 Al4 Al3 121.84(3) . 8 ?
Al1 Al4 Al3 76.22(3) 8 8 ?
Al1 Al4 Al3 103.78(3) 26_455 8 ?
Al3 Al4 Al3 180.0 26_455 8 ?
Fe1 Al4 Al3 70.13(4) . 3_565 ?
Fe1 Al4 Al3 109.87(4) 31 3_565 ?
Al1 Al4 Al3 69.23(5) 31 3_565 ?
Al1 Al4 Al3 110.77(5) . 3_565 ?
Al1 Al4 Al3 122.85(3) 8 3_565 ?
Al1 Al4 Al3 57.14(3) 26_455 3_565 ?
Al3 Al4 Al3 56.21(5) 26_455 3_565 ?
Al3 Al4 Al3 123.79(5) 8 3_565 ?
Fe1 Al4 Al3 109.87(4) . 33_545 ?
Fe1 Al4 Al3 70.13(4) 31 33_545 ?
Al1 Al4 Al3 110.77(5) 31 33_545 ?
Al1 Al4 Al3 69.23(5) . 33_545 ?
Al1 Al4 Al3 57.15(3) 8 33_545 ?
Al1 Al4 Al3 122.86(3) 26_455 33_545 ?
Al3 Al4 Al3 123.79(5) 26_455 33_545 ?
Al3 Al4 Al3 56.21(5) 8 33_545 ?
Al3 Al4 Al3 180.0 3_565 33_545 ?
Fe1 Al4 Al3 125.48(3) . 30_455 ?
Fe1 Al4 Al3 54.52(3) 31 30_455 ?
Al1 Al4 Al3 111.01(4) 31 30_455 ?
Al1 Al4 Al3 68.99(4) . 30_455 ?
Al1 Al4 Al3 104.22(3) 8 30_455 ?
Al1 Al4 Al3 75.78(3) 26_455 30_455 ?
Al3 Al4 Al3 86.12(5) 26_455 30_455 ?
Al3 Al4 Al3 93.88(5) 8 30_455 ?
Al3 Al4 Al3 123.81(5) 3_565 30_455 ?
Al3 Al4 Al3 56.19(5) 33_545 30_455 ?
Fe1 Al4 Al3 54.52(3) . 12 ?
Fe1 Al4 Al3 125.48(3) 31 12 ?
Al1 Al4 Al3 68.99(4) 31 12 ?
Al1 Al4 Al3 111.01(4) . 12 ?
Al1 Al4 Al3 75.78(3) 8 12 ?
Al1 Al4 Al3 104.22(3) 26_455 12 ?
Al3 Al4 Al3 93.88(5) 26_455 12 ?
Al3 Al4 Al3 86.12(5) 8 12 ?
Al3 Al4 Al3 56.19(5) 3_565 12 ?
Al3 Al4 Al3 123.81(5) 33_545 12 ?
Al3 Al4 Al3 180.0 30_455 12 ?
 
_refine_diff_density_max    0.523
_refine_diff_density_min   -0.711
_refine_diff_density_rms    0.145

_shelx_res_file
;
TITL 123_a.res in R-3c
    123_a.res
    created by SHELXL-2019/1 at 15:43:03 on 29-Feb-2024
REM Old TITL 123 in R-3c

REM SHELXT solution in R-3c
REM R1 0.104,  Rweak 0.004,  Alpha 0.026,  Orientation as input
REM Formula found by SHELXT:  Al13 Fe3

CELL  0.71073  14.5956  14.5956   7.6929   90.000   90.000  120.000
ZERR    1.000   0.0009   0.0009   0.0004    0.000    0.000    0.000
LATT  3
SYMM -Y, X-Y, Z
SYMM -X+Y, -X, Z
SYMM Y, X, 1/2-Z
SYMM X-Y, -Y, 1/2-Z
SYMM -X, -X+Y, 1/2-Z
SFAC AL FE
UNIT 78.0001 18
ACTA
TEMP 27.600
L.S. 10
REM BOND $H
LIST 4
FMAP 2
PLAN 20
WGHT    0.013600   27.434799
FVAR       0.11805
FE1   2    0.333333    0.493548    0.416667    10.50000    0.00659    0.00617 =
         0.00558    0.00069    0.00139    0.00329
AL1   1    0.359882    0.359882    0.250000    10.50000    0.01670    0.01670 =
         0.00724   -0.00107    0.00107    0.01416
AL2   1    0.333333    0.666667    0.416667    10.16667    0.00847    0.00847 =
         0.03699    0.00000    0.00000    0.00424
AL3   1    0.480651    0.636160    0.247322    11.00000    0.01647    0.01667 =
         0.01081    0.00006    0.00576   -0.00095
AL4   1    0.166667    0.333333    0.333333    10.50000    0.00784    0.00817 =
         0.03559    0.00118   -0.00387    0.00157
HKLF 4


REM  123_a.res in R-3c
REM wR2 = 0.0710, GooF = S = 1.326, Restrained GooF = 1.326 for all data
REM R1 = 0.0327 for 341 Fo > 4sig(Fo) and 0.0369 for all 367 data
REM 28 parameters refined using 0 restraints

END

WGHT      0.0136     27.4354

REM Highest difference peak  0.523,  deepest hole -0.711,  1-sigma level  0.145
Q1    1   0.4755  0.6177  0.4310  11.00000  0.05    0.52
Q2    1   0.4122  0.5650  0.3761  11.00000  0.05    0.49
Q3    1   0.5456  0.6657  0.1475  11.00000  0.05    0.45
Q4    1   0.4586  0.6317  0.0787  11.00000  0.05    0.41
Q5    1   0.1869  0.3639  0.4438  11.00000  0.05    0.39
Q6    1   0.4351  0.5528  0.2587  11.00000  0.05    0.39
Q7    1   0.4660  0.4660  0.2500  10.50000  0.05    0.37
Q8    1   0.3333  0.5587  0.4167  10.50000  0.05    0.37
Q9    1   0.3881  0.3333  0.0833  10.50000  0.05    0.37
Q10   1   0.3109  0.3525  0.2648  11.00000  0.05    0.36
Q11   1   0.2562  0.3350  0.3654  11.00000  0.05    0.36
Q12   1   0.4268  0.5806  0.1037  11.00000  0.05    0.36
Q13   1   0.2888  0.7216  0.3422  11.00000  0.05    0.34
Q14   1   0.2241  0.3666  0.1542  11.00000  0.05    0.33
Q15   1   0.3882  0.4881  0.2923  11.00000  0.05    0.33
Q16   1   0.3963  0.4849  0.4122  11.00000  0.05    0.33
Q17   1   0.2845  0.3333  0.0833  10.50000  0.05    0.32
Q18   1   0.2950  0.4115  0.3257  11.00000  0.05    0.32
Q19   1   0.3584  0.4531  0.2486  11.00000  0.05    0.32
Q20   1   0.0772  0.2636  0.3955  11.00000  0.05    0.31
;
_shelx_res_checksum   80649

_shelx_hkl_file
;
  -2   1   0    8.50    1.60
   1  -2   0    7.70    1.40
   1  -2   0    6.40    1.40
   1  -2   0    9.60    1.90
   1  -2   0    6.20    1.20
   1  -2   0   10.00    1.40
   1  -2   0    6.40    1.50
   1  -2   0   10.10    1.70
   1  -2   0    9.70    1.80
   1   1   0   11.20    1.50
   1   1   0    9.30    1.50
   1   1   0    6.80    0.90
   1   1   0   10.80    1.90
   1   1   0    6.50    1.40
   1   1   0   10.10    1.40
  -2   1   0    7.00    1.50
  -2   1   0    9.50    1.70
  -2   1   0   11.00    1.50
  -2   1   0    6.10    1.50
   2  -1   0   11.50    1.50
  -1   2   0   12.50    2.00
   2  -1   0    7.80    1.20
  -1   2   0   10.20    1.70
  -1  -1   0    6.60    1.20
  -1  -1   0    6.40    1.10
  -1  -1   0   10.00    1.10
  -1  -1   0    7.90    1.60
  -1  -1   0    8.70    1.50
  -1  -1   0    8.50    1.40
  -1   2   0    9.90    1.70
  -1   2   0    9.40    1.70
   2  -1   0   10.00    1.60
   2  -1   0    9.60    1.60
   2  -1   0    9.90    1.60
   2  -1   0    6.50    1.40
  -1   2   0    8.50    1.30
  -1   2   0   10.10    1.40
  -1   2   0    7.20    1.60
   0  -3   0  109.09    6.20
   0  -3   0  110.39    7.50
   0  -3   0  108.29    7.00
   0  -3   0  115.79    7.00
   0  -3   0  107.79    8.20
   0  -3   0  100.69    7.00
  -3   3   0  120.59    6.90
  -3   3   0  115.79    6.90
  -3   3   0  110.69    7.00
   0  -3   0  116.39    7.00
   3   0   0  125.09    6.90
   3   0   0  123.09    6.90
   3   0   0  120.29    8.50
   3   0   0  119.29    7.30
   3   0   0  129.89    7.30
  -3   3   0  120.99    6.80
  -3   3   0   99.69    6.90
  -3   3   0  121.49    7.70
   3   0   0  105.19    6.40
   0   3   0  124.99    7.20
   0   3   0  112.09    7.00
  -3   0   0  121.19    6.90
  -3   0   0  119.09    6.90
  -3   0   0  116.29    8.40
  -3   0   0  124.09    7.40
  -3   0   0  134.29    7.40
  -3   0   0  126.89    6.60
   0   3   0  103.99    7.80
   0   3   0  113.59    6.30
   0   3   0  109.09    6.40
   0   3   0  109.09    7.50
   3  -3   0  106.09    7.10
   0   3   0  126.09    7.40
   3  -3   0  104.49    6.80
   3  -3   0  121.39    6.80
   0   3   0  120.29    7.00
   3  -3   0  112.89    7.00
  -4   2   0  641.04   26.80
  -4   2   0  584.04   26.20
  -4   2   0  605.94   26.60
  -4   2   0  543.35   26.80
  -4   2   0  639.94   27.10
  -4   2   0  602.44   27.00
   2   2   0  594.64   26.90
   2   2   0  553.14   26.30
  -4   2   0  501.95   26.10
   2  -4   0  681.13   27.60
   2   2   0  558.74   26.40
   2  -4   0  576.14   26.60
   2  -4   0  557.64   26.70
   2  -4   0  535.55   27.10
   2  -4   0  500.95   26.10
   2  -4   0  589.04   26.20
   2   2   0  555.34   27.60
   2   2   0  594.54   27.40
   2  -4   0  532.95   26.60
   2  -4   0  600.64   27.50
  -2  -2   0  605.64   26.50
   4  -2   0  563.24   27.00
   4  -2   0  582.14   27.00
  -2   4   0  603.74   26.20
  -2  -2   0  551.14   26.60
  -2  -2   0  582.24   25.40
  -2  -2   0  527.65   26.80
  -2  -2   0  586.54   26.80
   4  -2   0  574.54   26.60
  -2   4   0  556.04   27.30
  -2   4   0  556.74   26.70
  -2   4   0  592.04   26.90
  -2   4   0  554.24   27.30
  -2   4   0  538.95   26.10
  -2   4   0  637.54   27.70
   4  -2   0  549.85   26.50
  -2  -2   0  593.14   26.60
   4  -2   0  589.34   26.50
   4  -2   0  597.44   26.60
  -2   4   0  586.54   26.60
  -5   1   0   39.00    4.70
   1   4   0   31.30    5.70
   4  -5   0   16.40    4.10
  -5   1   0   37.50    5.20
  -5   1   0   27.00    4.40
  -5   1   0   28.50    4.30
  -5   1   0   24.80    3.90
   1   4   0   26.00    3.30
   1   4   0   25.20    5.20
   1   4   0   22.90    3.80
   4  -5   0   35.00    4.70
   4  -5   0   25.20    4.10
   4  -5   0   27.20    4.40
   4  -5   0   24.60    3.80
   1   4   0   35.60    5.10
   1   4   0   33.80    5.00
  -5   1   0   20.90    5.90
   4  -5   0   29.90    5.10
   4  -5   0   21.60    4.60
  -1  -4   0   24.10    4.20
  -4   5   0   24.40    4.70
   5  -1   0   32.20    4.60
  -1  -4   0   31.60    4.60
  -4   5   0   30.90    5.20
  -1  -4   0   33.30    4.80
  -4   5   0   29.20    4.70
  -4   5   0   34.20    4.90
  -4   5   0   24.60    4.00
  -4   5   0   25.40    3.90
  -1  -4   0   32.20    3.40
   5  -1   0   32.00    5.00
   5  -1   0   22.90    4.70
  -1  -4   0   18.80    3.40
  -1  -4   0   32.20    5.50
  -1  -4   0   32.70    4.20
   5  -1   0   27.50    4.70
   4   1   0   25.60    3.80
   4   1   0   24.50    5.00
   1  -5   0   27.20    4.40
   4   1   0   28.70    4.50
   4   1   0   33.70    5.50
  -5   4   0   23.00    3.70
  -5   4   0   19.10    3.40
  -5   4   0   30.20    4.30
   1  -5   0   33.10    5.00
   4   1   0   24.80    3.70
   4   1   0   23.50    5.50
   1  -5   0   27.00    4.40
   1  -5   0   29.10    4.40
   1  -5   0   24.20    5.40
   1  -5   0   21.50    4.60
  -5   4   0   31.80    4.80
  -5   4   0   29.90    4.80
  -5   4   0   32.00    5.40
  -1   5   0   27.20    4.60
  -1   5   0   22.30    3.50
  -1   5   0   22.50    4.30
  -1   5   0   29.60    5.10
  -1   5   0   25.50    5.40
   5  -4   0   27.60    5.00
   5  -4   0   21.00    3.60
  -4  -1   0   26.60    4.70
  -4  -1   0   33.30    5.00
  -4  -1   0   32.90    4.30
  -4  -1   0   17.60    3.10
  -4  -1   0   36.10    6.10
   5  -4   0   29.80    5.20
   5  -4   0   28.40    4.60
   5  -4   0   34.60    5.70
  -1   5   0   32.30    5.90
  -1   5   0   19.60    3.70
   5  -4   0   31.70    4.50
   5  -4   0   28.30    4.20
  -4  -1   0   27.00    3.90
   3  -6   0    9.20    3.40
   3   3   0    6.50    2.80
   3  -6   0   11.20    4.50
   3   3   0   10.80    4.50
  -6   3   0    6.90    3.80
   3   3   0    7.30    4.10
   3   3   0   11.60    3.90
   3  -6   0    8.50    3.20
   3   3   0   10.60    4.80
   3  -6   0    6.50    2.80
  -6   3   0   12.40    4.20
   3  -6   0    9.70    2.70
   3  -6   0   12.40    3.30
  -6   3   0    7.20    2.50
  -6   3   0   10.50    3.60
  -6   3   0   12.80    3.30
   3  -6   0    6.80    4.00
   3   3   0   10.00    2.90
  -6   3   0   11.40    3.70
  -3   6   0   12.20    4.60
  -3   6   0    7.60    3.10
  -3   6   0   13.70    4.10
  -3   6   0   13.70    4.30
   6  -3   0   14.40    3.50
  -3  -3   0   16.00    3.70
   6  -3   0    4.70    2.30
  -3  -3   0   14.50    2.30
   6  -3   0   14.60    3.90
  -3   6   0   16.80    4.70
  -3  -3   0   20.50    4.20
  -3   6   0   15.80    3.50
   6  -3   0    9.00    3.50
   6  -3   0   14.20    3.80
  -3  -3   0    8.00    3.90
  -3   6   0   13.60    3.50
  -3  -3   0   11.40    3.50
  -3   6   0    9.90    2.90
  -3  -3   0   15.50    3.40
   6  -3   0   12.30    4.20
  -6   6   0 8689.83  369.66
   6   0   0 9574.34  371.56
   6   0   0 9332.37  367.86
   0  -6   0 8378.16  368.16
   0  -6   0 7860.11  368.36
   6   0   0 7815.12  371.66
  -6   6   0 8757.22  368.46
   0  -6   0 8307.67  370.86
  -6   6   0 8196.78  369.66
  -6   6   0 9038.79  368.36
   6   0   0 9647.83  369.76
  -6   6   0 8394.46  368.46
   0  -6   0 8101.39  367.66
   0  -6   0 8612.24  366.96
   0  -6   0 8511.65  369.56
   0  -6   0 8584.64  368.46
   6   0   0 9668.53  368.66
   6   0   0 9538.95  368.66
  -6   0   0 9795.02  368.76
   0   6   0 8047.89  366.86
   0   6   0 8252.27  368.16
   6  -6   0 8530.15  367.86
   0   6   0 9058.59  370.26
  -6   0   0 9264.37  368.66
   0   6   0 7846.61  369.96
   0   6   0 8530.35  368.66
  -6   0   0 8830.12  371.06
   6  -6   0 8411.66  371.56
   6  -6   0 8076.79  368.56
   0   6   0 8129.79  367.16
  -6   0   0 9999.00  369.16
   6  -6   0 8515.85  370.16
   6  -6   0 7913.81  368.26
  -6   0   0 8711.53  368.86
   6  -6   0 8560.04  368.56
   6  -6   0 8356.76  368.36
   0   6   0 9392.26  369.56
   5  -7   0   51.09    6.90
   2   5   0   38.50    6.80
   2   5   0   42.40    4.70
  -7   2   0   42.30    9.00
  -7   2   0   49.00    6.90
   2   5   0   32.30    5.10
   2   5   0   43.70    6.10
   5  -7   0   29.00    4.90
   2   5   0   43.60    6.60
   5  -7   0   51.19    7.10
   2   5   0   37.90    7.50
   5  -7   0   37.10    6.00
   5  -7   0   41.90    6.50
   2   5   0   47.90    6.40
  -7   2   0   50.39    6.60
  -7   2   0   60.99    6.10
   5  -7   0   43.50    5.70
   7  -2   0   39.10    6.50
  -5   7   0   52.19    5.90
  -5   7   0   41.20    6.30
  -5   7   0   52.29    6.50
   7  -2   0   45.20    6.80
  -5   7   0   51.49    7.00
  -2  -5   0   31.40    5.90
   7  -2   0   51.49    5.50
  -2  -5   0   32.50    6.60
   7  -2   0   53.09    6.80
  -5   7   0   45.00    6.20
  -5   7   0   41.40    7.80
   7  -2   0   43.80    6.00
  -2  -5   0   36.70    8.30
  -2  -5   0   36.80    6.00
  -2  -5   0   48.90    7.50
   7  -2   0   32.40    6.20
  -2  -5   0   48.50    6.50
   5   2   0   42.00    8.70
   2  -7   0   37.40    5.80
   5   2   0   46.30    8.10
   2  -7   0   54.99    6.10
  -7   5   0   31.10    5.30
   2  -7   0   40.60    5.80
  -7   5   0   43.70    6.50
   2  -7   0   48.50    9.70
  -7   5   0   36.80    6.40
  -7   5   0   33.50    5.30
   5   2   0   45.00    5.90
   5   2   0   50.89    6.10
   2  -7   0   42.00    6.50
   2  -7   0   43.80    8.30
   2  -7   0   50.59    5.70
   5   2   0   50.59    6.50
  -7   5   0   28.60    6.70
   5   2   0   53.89    8.10
  -7   5   0   54.19    6.80
   7  -5   0   39.30    6.20
   7  -5   0   42.10    7.40
  -2   7   0   35.10    6.60
  -5  -2   0   51.39    8.30
  -5  -2   0   54.89    4.60
   7  -5   0   43.40    6.20
  -5  -2   0   48.70    6.60
  -2   7   0   39.00    7.00
  -5  -2   0   51.39    6.30
  -5  -2   0   47.30    6.70
  -2   7   0   30.10    4.80
  -2   7   0   53.99    7.00
  -2   7   0   54.29    8.30
  -2   7   0   34.40    5.30
  -2   7   0   46.50    5.50
   7  -5   0   38.30    7.10
  -2   7   0   62.79    7.90
   7  -5   0   47.50    7.70
   7  -5   0   44.30    6.70
  -5  -2   0   38.10    6.00
  -5  -2   0   52.09    7.50
  -8   1   0   13.00    4.80
   1   7   0    6.20    3.60
  -8   1   0    0.60    7.00
   7  -8   0   16.80    6.70
   7  -8   0   13.60    5.70
   7  -8   0    0.90    5.70
   1   7   0    5.80    5.00
   1   7   0   10.80    3.50
  -8   1   0   -1.30    4.50
   7  -8   0   11.60    4.60
   7  -8   0    6.10    7.10
   7  -8   0   16.20    5.30
   7  -8   0   15.50    4.40
  -8   1   0   17.20    5.80
  -8   1   0    5.00    4.50
   1   7   0   19.00    5.80
   7  -8   0    0.50    5.80
   1   7   0   12.00    5.80
   1   7   0    6.20    3.50
  -8   1   0    8.80    3.80
   1   7   0   10.40    5.80
  -1  -7   0    4.40    4.60
   8  -1   0    5.20    5.10
   8  -1   0    8.70    5.80
   8  -1   0    4.80    3.40
  -1  -7   0    8.40    4.60
  -7   8   0    8.70    5.20
  -1  -7   0    8.00    4.70
  -7   8   0    9.90    4.60
   8  -1   0    8.40    4.20
  -7   8   0   17.10    6.10
   8  -1   0   15.00    4.70
   8  -1   0    7.40    5.80
  -1  -7   0   24.50    6.60
  -1  -7   0    8.60    4.40
  -1  -7   0    9.50    3.30
  -7   8   0   12.80    4.50
  -7   8   0   11.10    5.20
  -1  -7   0    6.00    7.70
  -7   8   0   22.10    5.10
   4  -8   0  129.99   11.30
   4  -8   0  119.39    9.80
   4  -8   0  129.09   12.70
  -8   4   0  121.19   10.40
   4   4   0  111.59   11.10
   4   4   0  118.69   11.70
  -8   4   0  125.59   10.30
   4  -8   0  122.49   10.50
   4  -8   0  145.29   11.00
   4  -8   0  139.59   11.90
   4   4   0  133.09   10.00
   4  -8   0  135.09   10.90
   4   4   0  134.09   12.90
   4   4   0  125.59   10.40
   4   4   0  133.59   10.20
  -8   4   0  131.89   10.70
  -8   4   0  121.69   11.00
  -8   4   0  127.59   11.10
  -8   4   0  130.69   11.20
   4   4   0  108.69   12.90
  -8   4   0  127.09   14.80
  -4   8   0  139.19   12.20
  -4  -4   0  134.29   10.50
   8  -4   0  110.39    9.90
  -4  -4   0  118.19   11.60
   8  -4   0  138.59   10.90
  -4  -4   0  125.29    8.80
  -4  -4   0  137.09   11.90
  -4   8   0  132.89   11.30
  -4   8   0  131.99   10.40
   8  -4   0  111.19   11.60
   8  -4   0  132.29   10.40
   8  -4   0  131.69   11.50
  -4   8   0  107.29   12.30
  -4   8   0  126.79   10.10
  -4   8   0  121.39    9.30
  -4  -4   0  128.29   10.70
  -4   8   0  128.59   12.30
  -4  -4   0  127.69   11.00
   8  -4   0  127.09   10.50
  -8   7   0    7.20    3.90
  -8   7   0   -0.50    4.00
  -8   7   0    3.60    3.90
   7   1   0    6.60    5.70
   7   1   0    3.10    4.90
  -8   7   0   14.70    5.80
   1  -8   0   10.30    4.00
  -8   7   0    7.70    4.50
  -8   7   0   12.10    5.70
   1  -8   0    5.40    4.60
   1  -8   0    6.90    5.10
   7   1   0   11.70    8.10
   7   1   0    7.30    4.40
   1  -8   0    5.90    4.00
   1  -8   0    5.80    7.00
   1  -8   0    7.60    6.30
   7   1   0   15.30    4.10
   7   1   0    8.40    3.40
   1  -8   0    6.30    5.80
   1  -8   0   11.80    5.20
  -1   8   0   15.20    6.20
   8  -7   0    6.20    5.00
  -1   8   0    7.20    7.30
  -7  -1   0   10.60    4.80
  -7  -1   0   15.20    6.90
  -1   8   0   10.60    3.90
  -7  -1   0   17.60    5.20
   8  -7   0   13.40    6.10
   8  -7   0   11.20    5.00
  -7  -1   0    5.30    5.40
  -7  -1   0    7.50    4.90
  -7  -1   0    9.00    4.20
   8  -7   0   13.50    4.80
   8  -7   0    7.60    3.60
  -1   8   0    0.70    3.60
  -1   8   0   14.10    6.10
  -1   8   0   19.40    5.20
  -1   8   0   10.00    5.90
   6  -9   0   77.69   10.30
   3   6   0   59.39    9.80
   3   6   0   62.89    9.10
  -9   3   0   52.39   12.60
   3   6   0   90.09   10.30
   6  -9   0   84.19    9.60
   6  -9   0   78.89    8.20
   3   6   0   79.79    9.70
   3   6   0   80.89   10.00
  -9   3   0   72.99   10.00
  -9   3   0   71.19    7.30
  -9   3   0   62.69    9.20
   3   6   0   68.59    8.90
   6  -9   0   50.29    9.00
  -9   3   0   67.49    8.60
   6  -9   0   76.89   12.10
  -9   3   0   65.09    9.20
   6  -9   0   70.19    9.10
   3   6   0   66.49    6.70
   6  -9   0   84.99   10.30
  -3  -6   0   68.89    8.90
  -6   9   0   79.39   10.50
  -3  -6   0   86.19    9.50
  -3  -6   0   90.79   11.40
  -6   9   0   79.39    9.00
  -6   9   0   85.39   10.10
  -6   9   0   69.19   10.90
  -6   9   0   58.19    8.10
  -3  -6   0   81.49   10.30
   9  -3   0   68.39    7.50
  -3  -6   0   78.19    9.60
   9  -3   0   78.19   10.00
  -3  -6   0   83.79   13.10
   9  -3   0   70.79   10.40
   9  -3   0   84.19    9.70
  -6   9   0   65.49    7.90
   9  -3   0   42.70    8.40
   9  -3   0   67.69    8.40
  -3  -6   0   68.59    6.60
   3  -9   0   75.69    8.60
   3  -9   0   74.19   11.00
  -9   6   0   77.79    9.30
   6   3   0   91.39   10.80
  -9   6   0   80.79   10.40
   3  -9   0   58.89    8.70
   6   3   0   54.89   11.70
  -9   6   0   69.39    9.50
   6   3   0   79.09    9.30
   6   3   0   70.89    8.40
   3  -9   0   85.99   12.10
   6   3   0   81.49   11.30
  -9   6   0   67.49    8.50
  -9   6   0   73.19    8.50
   3  -9   0   76.59    9.50
   3  -9   0   67.39    9.20
  -9   6   0   86.99   10.90
   3  -9   0   79.49    8.30
   6   3   0   78.79    8.80
   3  -9   0   73.79    9.80
   9  -6   0   75.19    9.30
  -3   9   0   73.59   11.00
   9  -6   0   78.89   11.90
  -6  -3   0   67.39    6.40
  -6  -3   0   64.79    8.60
  -6  -3   0   82.39   10.00
  -3   9   0   75.39   10.10
  -3   9   0   71.19    8.30
  -3   9   0   74.09    8.20
  -6  -3   0   77.29   10.60
  -3   9   0   72.69   11.20
  -3   9   0   66.99   11.00
   9  -6   0   58.89    8.50
  -3   9   0  101.29   11.30
  -6  -3   0   74.29    9.50
  -6  -3   0   70.79    9.70
   9  -6   0   73.19    9.20
   9  -6   0   55.79    9.00
   9  -6   0   80.49   10.60
  -3   9   0   78.19    9.20
  -9   9   0  193.08   17.50
   0  -9   0  197.48   15.80
   0  -9   0  199.08   13.30
   0  -9   0  188.58   15.20
  -9   9   0  208.78   16.00
   0  -9   0  220.28   20.40
   0  -9   0  200.28   18.30
   0  -9   0  184.38   12.90
  -9   9   0  203.28   15.50
   9   0   0  237.88   18.00
  -9   9   0  172.88   16.10
   9   0   0  213.08   15.80
   9   0   0  212.08   15.00
   9   0   0  222.68   20.80
  -9   9   0  195.88   14.90
   9   0   0  201.68   17.10
   9   0   0  222.98   17.60
   9   0   0  224.08   14.80
  -9   9   0  200.68   16.40
   0  -9   0  226.98   16.40
   0  -9   0  218.88   16.20
   9  -9   0  185.58   18.90
   9  -9   0  207.18   17.90
  -9   0   0  241.48   16.30
   0   9   0  203.28   17.60
   9  -9   0  200.98   16.30
   9  -9   0  207.48   15.80
   9  -9   0  201.28   14.60
   9  -9   0  189.78   17.40
   0   9   0  212.98   16.00
   0   9   0  190.38   14.00
   0   9   0  164.38   17.30
   0   9   0  209.78   16.80
  -9   0   0  190.08   14.90
  -9   0   0  230.28   17.00
   0   9   0  194.98   13.70
   9  -9   0  208.38   16.90
   0   9   0  206.18   16.90
  -9   0   0  215.48   15.20
  -9   0   0  186.58   19.30
   8 -10   0    8.50    8.80
   2   8   0    5.80    6.40
 -10   2   0    0.30    4.30
   8 -10   0   -5.30    4.90
   2   8   0    1.10    6.30
   2   8   0   -2.70    6.50
   2   8   0   -5.20    4.60
 -10   2   0    6.20    6.70
 -10   2   0   -2.50    5.20
   8 -10   0   -7.30    7.40
   8 -10   0    6.30    6.20
   2   8   0    4.00    7.20
   8 -10   0   -6.60    6.50
 -10   2   0   25.80   11.30
 -10   2   0    0.80    4.80
   8 -10   0    8.80    5.80
 -10   2   0   18.90    7.50
   8 -10   0    7.60    6.30
   8 -10   0    1.40    7.60
   2   8   0    0.40    4.10
  -2  -8   0    0.00    5.60
  10  -2   0   -4.60    5.40
  10  -2   0   13.40    7.70
  -2  -8   0    3.20    5.70
  -2  -8   0    3.20    7.30
  -8  10   0    6.90    7.90
  10  -2   0    2.60    4.70
  10  -2   0    1.40    6.50
  -2  -8   0    8.80    9.80
  -8  10   0    2.60    5.80
  10  -2   0    3.70    4.50
  -2  -8   0    3.80    6.20
  -8  10   0  -10.40    8.60
  -8  10   0   -4.50    3.60
  -8  10   0    7.10    6.10
  -8  10   0   10.10    5.60
  -8  10   0   18.20    7.80
  -2  -8   0    4.90    6.00
  -2  -8   0    1.70    3.60
   5 -10   0   35.80    7.90
   5   5   0   41.70    7.70
 -10   5   0   40.10    8.60
 -10   5   0   24.20    6.60
   5 -10   0   15.80    8.80
   5 -10   0   39.00    7.00
 -10   5   0   22.70    5.70
 -10   5   0   23.20   11.50
 -10   5   0   16.00    5.80
 -10   5   0   28.00    8.30
   5   5   0   21.70    8.10
   5   5   0   22.10    6.50
 -10   5   0   33.10    8.20
   5 -10   0   25.70    6.30
   5 -10   0   34.40    7.50
   5 -10   0   32.50    8.10
   5   5   0   43.50    7.80
   5   5   0   42.70   10.20
   5   5   0   39.90    8.70
   5 -10   0   36.70    7.90
  -5  -5   0   33.20    8.00
  -5  10   0   19.30    8.50
  10  -5   0   34.00    9.00
  10  -5   0   43.60    7.60
  -5  -5   0   23.40    7.10
  -5  -5   0   27.30    6.60
  -5  10   0   23.50    5.20
  -5  -5   0   30.40   11.30
  -5  -5   0   20.70    7.00
  10  -5   0   37.40    7.90
  -5  10   0   27.20    7.60
  -5  10   0   23.30    7.20
  10  -5   0   27.40    7.70
  -5  10   0   28.00    8.90
  -5  10   0   30.80    6.80
  -5  10   0   37.60    6.80
  -5  10   0   27.60    9.00
  -5  -5   0   39.60    8.00
  10  -5   0   31.90    8.30
  -5  -5   0   32.30    4.70
   2 -10   0   -3.70    7.60
   8   2   0    6.50    5.30
 -10   8   0   10.10    5.80
 -10   8   0   11.50    6.60
   2 -10   0    5.50    5.30
   8   2   0    1.20    7.10
   8   2   0    5.50    4.70
   8   2   0    0.30    7.00
   8   2   0    2.70    9.90
   2 -10   0    4.60    5.10
   2 -10   0    4.70    5.00
   2 -10   0  -10.00    7.70
 -10   8   0    3.10    4.40
 -10   8   0   -8.60    5.20
   2 -10   0    7.10    6.50
   2 -10   0   -1.70    6.30
   8   2   0   -4.50    5.30
 -10   8   0   -5.60    6.60
 -10   8   0   -2.60    5.90
   2 -10   0    3.10    9.00
  -8  -2   0    2.10    4.60
  10  -8   0   -1.90    5.40
  10  -8   0    3.00    5.20
  -8  -2   0    4.40    6.00
  -2  10   0    7.80    5.20
  -2  10   0    7.90    8.10
  10  -8   0    3.00    8.30
  -8  -2   0   -1.10    4.90
  -2  10   0    5.80    7.50
  -2  10   0   11.20    7.90
  -2  10   0    6.70    6.70
  -2  10   0    2.80    4.60
  10  -8   0    3.50    5.90
  10  -8   0    6.90    6.80
  -8  -2   0    3.80    6.50
  -8  -2   0    5.10    5.10
  -2  10   0    0.20    6.90
  -8  -2   0    1.40    7.80
  -8  -2   0    0.10    3.10
  -2  10   0    8.00    5.80
   1  10   0   17.10    6.60
  10 -11   0   42.80   12.70
  10 -11   0   29.30    7.80
 -11   1   0   33.00   10.70
  10 -11   0   31.10    8.20
  10 -11   0   13.30    9.90
   1  10   0   26.40    9.90
 -11   1   0   39.80   14.00
   1  10   0   27.80    6.40
   1  10   0   31.80    6.90
   1  10   0    9.40    8.40
 -11   1   0   25.30    8.50
   1  10   0   24.80   10.60
  10 -11   0   27.90   10.70
  10 -11   0   24.60    9.30
 -11   1   0   24.50    8.40
 -11   1   0   30.60    6.40
  10 -11   0   40.60    9.50
 -11   1   0   23.40    6.50
   1  10   0   19.50    9.20
  -1 -10   0   18.30    8.30
  -1 -10   0   21.20    6.50
 -10  11   0   23.20    8.50
 -10  11   0   10.50    9.00
  -1 -10   0   -0.80    7.00
  -1 -10   0   55.69   15.00
  11  -1   0   34.90   10.50
  11  -1   0   29.00    9.80
  11  -1   0    4.30   10.10
  11  -1   0   21.50    6.90
 -10  11   0   20.30    8.00
  -1 -10   0   29.30   11.20
  -1 -10   0   25.40    8.60
 -10  11   0   46.70   12.00
  -1 -10   0   12.20    6.90
  11  -1   0   23.00    8.00
  11  -1   0   28.80    8.60
 -10  11   0   28.50    7.50
   7 -11   0   27.00   10.10
 -11   4   0   24.20    6.90
   7 -11   0   25.00    7.00
   7 -11   0   22.40    6.10
 -11   4   0   22.90    8.70
   4   7   0   38.60   11.80
   4   7   0   29.50    7.90
   4   7   0   30.00    9.30
   4   7   0   32.60    8.20
 -11   4   0   23.00   13.30
 -11   4   0   33.10    7.30
   7 -11   0   21.80    8.50
   7 -11   0   19.60    7.50
   7 -11   0   30.90    8.00
 -11   4   0   23.80    7.90
   4   7   0   31.80    8.00
 -11   4   0   29.30    7.20
   4   7   0   12.40    8.10
   7 -11   0   20.00    7.80
  -7  11   0   24.90    9.80
  -4  -7   0   17.80   11.90
  11  -4   0   46.50   10.10
  -4  -7   0   24.80    9.60
  -4  -7   0   38.00    7.70
  11  -4   0   30.40    7.80
  -4  -7   0   24.90    7.20
  11  -4   0   26.40   10.50
  -7  11   0   20.00    8.60
  -7  11   0   22.10    7.70
  -4  -7   0   48.20    9.20
  -7  11   0   15.60    6.90
  -4  -7   0   31.60    7.40
  11  -4   0   26.70    6.60
  11  -4   0   39.20    9.20
  11  -4   0   18.70    5.60
  -7  11   0   17.20    6.30
  -7  11   0   38.50    8.10
  -4  -7   0   26.90    5.00
   7   4   0   27.80    7.20
   4 -11   0   25.30    8.90
   4 -11   0   34.80    7.80
   4 -11   0   27.70   10.30
 -11   7   0   20.60    8.10
   4 -11   0   32.90    7.40
   7   4   0   39.80   13.10
   7   4   0   14.60    5.90
 -11   7   0   20.90    6.80
   7   4   0   24.70    9.70
 -11   7   0   26.70    8.40
 -11   7   0   38.70    7.70
   4 -11   0   10.00   10.40
   4 -11   0   27.20    7.60
   7   4   0   42.60    8.80
   4 -11   0   36.40    8.40
   4 -11   0   35.10    7.50
 -11   7   0   30.60    8.70
   7   4   0   26.20   11.00
 -11   7   0   25.80    7.00
   7   4   0   23.40    9.40
  -4  11   0   36.50   10.60
  -7  -4   0   41.60    8.50
  -4  11   0   34.20    7.90
  -7  -4   0   34.20    5.10
  -7  -4   0   31.70    7.90
  11  -7   0   39.50    9.60
  -4  11   0   19.70    8.60
  -7  -4   0   35.80    8.90
  11  -7   0   34.00   11.40
  11  -7   0   25.00    6.60
  -7  -4   0   35.70    7.60
  11  -7   0   33.00    7.90
  -4  11   0   25.20    7.40
  11  -7   0   34.00    7.20
  -4  11   0   27.00    7.40
  -4  11   0   10.00   11.50
  11  -7   0   28.60    8.80
  -7  -4   0   23.20    7.30
  -4  11   0   23.50    9.60
  -4  11   0   30.50    6.80
  10   1   0   21.70    6.60
   1 -11   0   25.50    6.90
   1 -11   0   -3.70    7.20
  10   1   0   16.10    8.80
  10   1   0   19.20    8.30
   1 -11   0   34.90    9.80
  10   1   0   19.30   12.80
  10   1   0   15.10    9.70
  10   1   0   -0.50    9.00
   1 -11   0   22.70   12.70
 -11  10   0   39.10   11.00
 -11  10   0   19.70    9.60
 -11  10   0   22.60    7.90
   1 -11   0   19.00    7.30
 -11  10   0   30.50    7.30
   1 -11   0   11.40   10.30
   1 -11   0   16.40    8.70
  10   1   0   12.20    5.70
 -11  10   0   12.60    7.90
   1 -11   0   36.20    8.90
 -11  10   0   23.00    8.30
  11 -10   0   20.30   10.20
  -1  11   0   34.30    8.90
  11 -10   0   17.00   11.80
  11 -10   0   27.20    8.20
  11 -10   0   12.10    6.80
  11 -10   0   14.40    8.20
  -1  11   0   17.10    7.20
  -1  11   0   19.30    9.70
  -1  11   0   36.40    9.10
  -1  11   0   -8.60    7.50
  -1  11   0   26.90   10.50
 -10  -1   0   15.10    8.30
  11 -10   0    7.00    8.50
  -1  11   0   25.40    6.70
  11 -10   0   19.00   11.50
 -10  -1   0   17.70    8.10
 -10  -1   0   12.10   10.70
 -10  -1   0   23.70   10.60
   3   9   0   -4.50    8.90
   3   9   0  -10.30   12.70
 -12   3   0    9.00    9.00
   9 -12   0   -4.20    9.80
   9 -12   0   -2.60    7.50
   3   9   0    5.50   10.10
   9 -12   0   25.10   12.20
   9 -12   0    8.10    8.10
   3   9   0   -0.60    5.90
   3   9   0   11.00    5.60
 -12   3   0   -3.40    5.40
 -12   3   0  -15.50    8.90
 -12   3   0   13.10   13.90
 -12   3   0   -8.80    6.30
   9 -12   0   -4.40   11.10
   9 -12   0    3.50    8.10
 -12   3   0    6.50    6.60
   3   9   0   -8.50    7.70
   9 -12   0   -0.50    6.80
   3   9   0   -3.20    7.90
   9 -12   0   12.90    7.50
  -9  12   0   14.20   11.90
  -3  -9   0   -9.20   12.80
  12  -3   0    9.20    9.30
  12  -3   0    0.60    8.70
  -3  -9   0    3.10    4.60
  12  -3   0    0.80    5.20
  -3  -9   0   15.30   10.70
  -9  12   0    1.00    8.90
  -3  -9   0    2.40    6.70
  12  -3   0    5.50    6.00
  -3  -9   0   -2.10    7.00
  -3  -9   0   14.00    7.90
  -9  12   0    9.70    7.20
  -9  12   0    5.40    9.60
  12  -3   0    3.40   10.60
  12  -3   0   -6.10    6.80
  -9  12   0  -17.80    6.90
  -3  -9   0    2.10    7.10
  -9  12   0  -15.60    7.00
  -9  12   0   -0.70    5.80
 -12   6   0 2360.26  107.59
   6   6   0 2537.05  108.19
   6   6   0 2402.76  107.29
 -12   6   0 2324.07  108.09
   6 -12   0 2440.36  110.39
 -12   6   0 2427.46  108.59
   6 -12   0 2238.18  106.69
 -12   6   0 2307.67  107.09
   6   6   0 2244.48  106.89
   6 -12   0 2385.36  108.19
   6 -12   0 2402.16  105.89
 -12   6   0 2376.06  105.99
 -12   6   0 2293.57  114.79
   6 -12   0 2318.67  108.09
   6 -12   0 2369.06  107.49
   6   6   0 2267.57  109.99
   6   6   0 2353.16  111.99
   6   6   0 2251.77  107.79
   6 -12   0 2501.65  108.29
   6   6   0 2402.26  110.19
  -6  -6   0 2191.18  108.09
  -6  12   0 2498.55  106.59
  -6  12   0 2279.17  107.39
  -6  12   0 2331.87  109.29
  -6  -6   0 2214.08  113.49
  -6  -6   0 2360.06  102.99
  -6  -6   0 2539.45  108.39
  -6  12   0 2361.16  106.29
  -6  -6   0 2490.35  107.79
  12  -6   0 2398.26  107.49
  -6  -6   0 2368.56  106.99
  12  -6   0 2281.37  108.79
  12  -6   0 2439.06  107.69
  -6  -6   0 2413.66  107.89
  -6  12   0 2425.66  108.69
  -6  12   0 2607.54  111.19
   3 -12   0    4.10    7.40
   9   3   0    2.00    6.10
   9   3   0   -9.70    8.90
   3 -12   0    5.40    8.20
   3 -12   0    5.60   11.90
 -12   9   0    7.50    8.10
   9   3   0    1.40    9.00
   9   3   0  -15.40   13.00
   3 -12   0   -5.10    5.90
 -12   9   0   -5.10    7.60
   9   3   0   -1.10    7.40
   9   3   0   -3.10    6.00
 -12   9   0   -3.00    6.50
   3 -12   0   -6.10   10.50
   9   3   0   12.50   14.10
 -12   9   0    1.70    9.10
   3 -12   0   11.70    6.70
   3 -12   0   -6.30   11.10
   3 -12   0    4.00    8.00
 -12   9   0    5.20    8.10
 -12   9   0    8.00    8.60
  -3  12   0   -1.50    8.60
  -3  12   0   -4.60    9.10
  12  -9   0   -0.70   10.10
  -9  -3   0   -9.10    6.80
  -9  -3   0   -6.50    5.80
  -3  12   0    7.60    6.80
  -9  -3   0    0.20    6.70
  -3  12   0    6.40    9.70
  -3  12   0    4.60    7.10
  -3  12   0   -3.90    8.40
  -9  -3   0    4.80    4.00
  12  -9   0   -2.80    7.10
  12  -9   0    1.50    5.30
  -3  12   0   10.40    5.90
  -9  -3   0    7.30    9.30
  12  -9   0    8.50    8.00
  12  -9   0    3.80    8.20
  -9  -3   0   -2.40    7.70
 -12  12   0 1451.05   71.69
   0 -12   0 1343.57   75.09
  12   0   0 1551.24   67.69
  12   0   0 1538.65   69.49
  12   0   0 1581.04   69.39
 -12  12   0 1355.06   69.69
   0 -12   0 1393.56   65.69
   0 -12   0 1426.86   69.09
  12   0   0 1492.65   71.99
   0 -12   0 1369.26   69.09
 -12  12   0 1344.07   68.39
 -12  12   0 1401.26   68.79
   0 -12   0 1434.66   69.99
   0 -12   0 1311.57   71.39
  12 -12   0 1273.07   67.49
   0  12   0 1373.66   72.29
 -12   0   0 1473.95   69.99
 -12   0   0 1412.86   70.59
 -12   0   0 1517.35   69.49
   0  12   0 1328.77   65.59
  12 -12   0 1361.96   69.19
   0  12   0 1438.66   66.79
   0  12   0 1379.66   68.69
  12 -12   0 1456.85   70.99
  12 -12   0 1378.36   69.19
  12 -12   0 1232.58   69.89
  12 -12   0 1388.36   74.99
   0  12   0 1358.76   71.59
 -12   0   0 1327.07   64.59
 -12   0   0 1578.64   69.79
   0  12   0 1416.56   70.49
 -12   0   0 1384.36   73.59
   2  11   0   77.39   13.20
 -13   2   0   55.89   10.00
   2  11   0   64.29    9.30
  11 -13   0   77.79   20.30
   2  11   0   37.30   13.80
   2  11   0   61.19   10.00
  11 -13   0   69.19   13.50
 -13   2   0   56.89   15.00
 -13   2   0   37.20   10.90
 -13   2   0   94.59   20.30
 -13   2   0   66.39   12.70
  11 -13   0   43.00   14.00
   2  11   0   52.39   10.30
  11 -13   0   47.00   13.40
 -13   2   0   46.60   12.10
  11 -13   0   65.79   13.50
   2  11   0   72.89   13.70
  11 -13   0   71.29   12.80
  -2 -11   0   63.49   19.00
  13  -2   0   51.29   13.20
 -11  13   0   83.29   18.10
  13  -2   0   69.79   10.90
  13  -2   0   64.79   11.00
  -2 -11   0   69.99   14.10
 -11  13   0   71.39   12.80
 -11  13   0   56.59   12.00
  13  -2   0   70.79   13.90
  -2 -11   0   36.50   15.20
  -2 -11   0   67.19    9.10
 -11  13   0   49.30   12.40
 -11  13   0   49.20   14.50
  -2 -11   0   70.69   13.30
  -2 -11   0   71.69   13.20
 -13   5   0   43.60   12.30
   8 -13   0   29.00    9.60
   8 -13   0   37.60   11.10
 -13   5   0   33.90    9.40
   8 -13   0   41.70   11.30
 -13   5   0   32.10   17.50
   5   8   0   53.89   13.20
 -13   5   0   43.30    9.30
   5   8   0   50.49   11.00
   5   8   0   30.20   10.10
   8 -13   0   44.40   10.70
   5   8   0   -1.20   11.50
   8 -13   0   31.70    9.40
 -13   5   0   47.50   10.90
   5   8   0   32.10    8.60
 -13   5   0   39.10   10.40
   8 -13   0   38.90   10.70
   5   8   0   42.30   16.70
   8 -13   0   81.49   16.50
  -5  -8   0   55.09   11.10
  -8  13   0   43.80   13.10
  -5  -8   0   61.69   13.80
  13  -5   0   36.90   10.60
  -5  -8   0   40.70   10.60
  -8  13   0   41.10    8.80
  13  -5   0   41.50    8.70
  13  -5   0   34.20   11.30
  -5  -8   0   47.40    6.80
  -8  13   0   44.50   12.20
  13  -5   0   48.00   11.00
  -5  -8   0   53.69   11.30
  -5  -8   0   53.29   11.70
  -8  13   0   41.50    9.10
  -5  -8   0   34.20   16.30
  -8  13   0   41.50    9.40
  -8  13   0   38.20   10.80
 -13   8   0   50.89   10.40
   5 -13   0   36.70    8.90
   8   5   0   57.69   11.00
   8   5   0   21.50    8.50
   5 -13   0   46.30   15.40
 -13   8   0   31.50   11.10
   8   5   0    0.50   15.30
   5 -13   0   58.99   10.50
   5 -13   0   35.50   11.80
   5 -13   0   40.80   11.50
 -13   8   0   69.79   13.50
   5 -13   0   36.40    9.20
 -13   8   0   36.20   11.40
 -13   8   0   41.10    8.30
   8   5   0   56.99   16.70
 -13   8   0   18.00   16.10
 -13   8   0   49.20   11.40
   8   5   0   56.29   13.00
   8   5   0   41.70   10.10
  -8  -5   0   39.60    6.10
  13  -8   0   52.19   10.70
  -8  -5   0   17.20    8.10
  -5  13   0   51.79    9.80
  -8  -5   0   21.40    9.10
  -5  13   0   32.90    8.50
  -8  -5   0   47.60   10.60
  -8  -5   0   62.39   18.40
  -5  13   0   31.40   11.80
  13  -8   0   19.80   12.20
  13  -8   0   35.30   10.60
  -5  13   0   25.40    9.10
  13  -8   0   24.60    7.30
  -5  13   0   31.50    9.10
  -5  13   0   33.10   11.00
  -8  -5   0   52.79   11.60
  -8  -5   0   70.79   12.20
  -5  13   0   35.00   12.90
  13  -8   0   54.79   12.20
   2 -13   0   60.89   17.00
   2 -13   0   67.69   10.90
  11   2   0    2.40   13.30
  11   2   0   62.19   13.00
 -13  11   0   36.80   11.30
 -13  11   0   65.09   12.90
  11   2   0   62.19   18.80
  11   2   0   65.39   11.40
  11   2   0   71.99   15.50
   2 -13   0   56.49   13.50
   2 -13   0   87.99   14.30
   2 -13   0   50.89   11.90
 -13  11   0   73.99   14.50
   2 -13   0   46.40   11.00
   2 -13   0   64.59   17.80
  11   2   0   87.29   13.40
 -13  11   0   56.09   10.50
  -2  13   0   63.69   13.50
  13 -11   0   31.60   13.60
  13 -11   0   70.69   18.00
  13 -11   0   51.49   13.10
  -2  13   0   46.70   14.30
  13 -11   0   43.50    9.40
 -11  -2   0   61.49    7.70
  -2  13   0   76.19   11.30
 -11  -2   0   58.49   12.00
 -11  -2   0   39.80   11.70
  -2  13   0   59.39   10.70
 -11  -2   0   39.40   14.80
 -11  -2   0   62.19   12.70
  -2  13   0   37.60    9.30
  -2  13   0   94.59   16.50
  13 -11   0   48.70   14.80
  13 -14   0   26.90   14.00
   1  13   0   41.40   10.80
  13 -14   0   19.50   14.30
   1  13   0   34.00   14.80
 -14   1   0   30.50   13.00
   1  13   0   19.50   15.10
 -14   1   0   42.20   18.90
   1  13   0   15.20    9.60
 -14   1   0   13.80   13.00
  13 -14   0   32.00   12.40
   1  13   0   24.20   11.40
  13 -14   0   16.80   21.00
   1  13   0   17.90   13.60
 -14   1   0   42.30   10.70
  -1 -13   0   23.20   20.30
  14  -1   0   17.20   14.40
 -13  14   0   44.80   13.60
 -13  14   0   14.60   14.60
  14  -1   0   34.00   14.40
  -1 -13   0   20.50   12.70
  -1 -13   0   31.40    9.80
  -1 -13   0   40.90   14.60
 -13  14   0   50.49   12.30
 -13  14   0   49.40   21.40
  14  -1   0   21.80    9.10
  14  -1   0   20.00   10.40
 -14   4   0   13.60   10.70
 -14   4   0   11.00    9.00
  10 -14   0   -7.40   16.50
 -14   4   0   16.90   10.60
  10 -14   0   10.20   12.00
   4  10   0    4.40   12.70
   4  10   0    1.50   10.20
   4  10   0  -15.70    8.00
  10 -14   0    4.40   12.40
   4  10   0    2.60    7.80
 -14   4   0   10.40   19.50
  10 -14   0    6.10   10.00
  10 -14   0  -16.50   15.40
 -14   4   0    2.60    8.20
  10 -14   0    5.90   10.50
   4  10   0   -3.70   19.30
  10 -14   0   -0.10   10.80
  14  -4   0   -4.80    9.70
 -10  14   0  -17.70   11.00
  -4 -10   0   24.00   17.90
 -10  14   0    3.20    8.90
 -10  14   0    4.10    8.20
 -10  14   0    7.80   14.10
  14  -4   0    4.30    7.00
  -4 -10   0   -7.30    5.70
  -4 -10   0    5.20   10.20
  14  -4   0    8.40    8.20
  -4 -10   0   -0.40    9.30
  -4 -10   0    8.90    8.40
 -10  14   0   -3.30    8.40
  14  -4   0   17.30   12.20
  -4 -10   0   -9.80   14.10
   7 -14   0  114.09   14.30
 -14   7   0  110.19   25.40
 -14   7   0   73.59   11.30
   7 -14   0   90.99   14.40
   7   7   0   90.79   13.90
 -14   7   0   96.29   13.20
   7 -14   0  112.29   15.40
 -14   7   0  109.39   15.80
   7   7   0  121.99   19.20
   7 -14   0   63.09   18.80
 -14   7   0  102.09   15.50
   7   7   0  123.49   21.50
   7   7   0  121.49   18.10
   7 -14   0   49.99   14.30
   7 -14   0  100.49   15.30
   7   7   0  113.49   15.20
   7   7   0  101.99   15.90
   7 -14   0   96.09   14.10
  -7  -7   0   48.00   15.40
  14  -7   0  140.99   16.10
  -7  14   0  100.69   13.00
  14  -7   0   95.39   15.10
  -7  14   0   96.99   17.20
  14  -7   0  133.39   16.50
  -7  14   0   84.69   12.10
  -7  14   0   89.09   14.00
  -7  -7   0   91.39   12.90
  -7  14   0  110.29   17.10
  -7  -7   0  106.19   15.20
  -7  -7   0   93.19   16.20
  -7  -7   0  101.19   15.20
  -7  -7   0  127.09   23.30
  -7  14   0  113.69   18.40
  -7  -7   0   96.19   10.20
 -14  10   0    0.70   10.90
  10   4   0   10.40   12.10
   4 -14   0    3.80   14.60
 -14  10   0   -4.40   11.10
  10   4   0    9.60   18.40
  10   4   0    6.10   18.00
   4 -14   0    9.30   10.50
  10   4   0    4.10    7.60
   4 -14   0    2.60    8.80
  10   4   0   -3.50    7.70
   4 -14   0   12.70   17.50
   4 -14   0    0.90    8.10
  10   4   0   20.90   10.90
 -14  10   0    2.60   11.90
 -14  10   0  -18.50    7.70
   4 -14   0   -0.80   11.40
  -4  14   0   14.20    8.80
 -10  -4   0    6.30   10.70
 -10  -4   0   -2.10   13.70
  -4  14   0    6.20    7.40
  -4  14   0   15.90   14.60
  14 -10   0  -18.70    8.90
  14 -10   0   10.40    7.60
  -4  14   0   -2.30    8.20
 -10  -4   0   12.30   10.00
 -10  -4   0   14.10    9.10
 -10  -4   0    6.20    4.90
  -4  14   0   15.40   10.60
  -4  14   0   -9.00   12.00
 -10  -4   0   -2.30   10.40
  14 -10   0    4.80   13.30
  14 -10   0   29.20   12.60
   1 -14   0   10.10   12.60
  13   1   0   14.10   10.50
   1 -14   0   20.30    9.90
  13   1   0   21.40    9.60
 -14  13   0    3.20   11.30
 -14  13   0   16.60   14.40
   1 -14   0   29.10   20.10
  13   1   0   10.60   13.60
   1 -14   0   13.20   12.40
  13   1   0   28.50   13.10
 -14  13   0   -7.60   16.50
 -14  13   0   18.30   10.10
  14 -13   0   40.80   15.30
 -13  -1   0   28.90    7.70
  -1  14   0   18.30   14.00
  14 -13   0   24.40   18.60
  14 -13   0   53.09   20.00
 -13  -1   0   18.10   11.20
  14 -13   0   26.40   17.40
  -1  14   0   42.20   10.50
  -1  14   0   31.70   11.90
  -1  14   0   14.30   10.20
  14 -13   0    3.60    8.80
  -1  14   0   16.90   14.00
 -13  -1   0   27.50   11.60
  -1  14   0   23.80   13.50
 -13  -1   0   23.80   12.80
 -13  -1   0   40.90   18.10
 -15   3   0   40.60   22.40
   3  12   0    4.20   14.40
  12 -15   0   30.20   13.60
   3  12   0   25.30   13.60
 -15   3   0   32.30   25.50
   3  12   0   41.10   10.50
   3  12   0   26.00   27.90
  12 -15   0   34.00   21.00
 -15   3   0   17.30   11.00
 -15   3   0   44.50   14.20
   3  12   0   29.20    9.30
   3  12   0   40.30   12.80
   3  12   0   34.00   14.70
  12 -15   0   40.90   14.40
 -12  15   0   22.00   10.20
  -3 -12   0   26.70    9.10
 -12  15   0   38.70   20.50
  -3 -12   0   50.39   15.30
  15  -3   0   50.59   14.80
 -12  15   0   28.20   14.90
  -3 -12   0   40.60   13.80
  15  -3   0   35.70   10.10
  15  -3   0   32.10   16.20
  15  -3   0   18.90   10.90
  -3 -12   0   36.50   23.70
 -12  15   0   20.80   16.70
   9 -15   0  100.89   25.00
   9 -15   0  135.59   19.30
   6   9   0  140.19   27.50
   6   9   0   70.89   16.60
   6   9   0  112.09   16.30
   6   9   0  140.59   18.20
 -15   6   0  108.29   26.60
 -15   6   0  107.29   17.30
   6   9   0  115.89   17.10
 -15   6   0  141.89   18.20
   9 -15   0  113.29   18.10
   9 -15   0  108.99   16.90
 -15   6   0   86.49   14.00
   9 -15   0  121.19   17.90
 -15   6   0  117.69   15.90
  15  -6   0  110.59   30.80
  -6  -9   0  104.69   25.00
  -9  15   0   85.89   14.70
  -9  15   0  115.29   33.30
  -6  -9   0  167.38   21.20
  15  -6   0  133.19   17.80
  15  -6   0  100.59   13.40
  -6  -9   0  117.19   16.40
  -9  15   0   95.09   19.70
  15  -6   0  109.99   16.80
  -9  15   0   84.49   14.40
  -6  -9   0  125.19   12.60
   9   6   0   93.09   25.20
   6 -15   0  119.69   16.80
 -15   9   0  109.39   28.60
 -15   9   0   67.29   12.10
   9   6   0   76.99   14.50
   9   6   0  129.09   17.60
   6 -15   0   98.09   15.80
   6 -15   0   88.19   15.60
   9   6   0  129.59   16.90
 -15   9   0  103.39   18.20
   9   6   0  136.69   22.70
 -15   9   0  111.19   17.90
   9   6   0  109.89   22.40
  -9  -6   0  109.99   16.40
  15  -9   0   93.99   16.70
  15  -9   0  130.19   17.60
  -6  15   0   54.89   14.20
  -6  15   0   89.79   13.40
  -9  -6   0  116.19   25.60
  15  -9   0   92.19   13.70
  -6  15   0   95.89   12.90
  15  -9   0   73.19   25.80
  -6  15   0   86.59   23.20
  -6  15   0  101.89   19.40
  -9  -6   0  108.69   16.50
  -9  -6   0  118.89   11.00
  12   3   0   55.29   27.40
   3 -15   0   32.10   13.60
  12   3   0   44.30   24.00
  12   3   0   35.10   11.60
 -15  12   0   42.30   12.70
   3 -15   0   22.90   10.80
  12   3   0   49.00   16.40
  12   3   0   25.60   12.70
  12   3   0   40.50   12.10
   3 -15   0   23.80   11.00
 -15  12   0   28.10   13.70
   3 -15   0   23.10   18.50
 -15  12   0   20.20   16.30
 -15  12   0   34.90   15.80
  15 -12   0   34.10   17.30
  -3  15   0   25.10   13.20
 -12  -3   0   29.70    7.30
  15 -12   0   21.80   19.10
  15 -12   0   52.99   18.50
 -12  -3   0   35.30   15.30
  -3  15   0   29.70   10.70
  -3  15   0   22.60   15.50
  15 -12   0   25.40   11.70
  -3  15   0    5.10   14.90
  -3  15   0   41.00   13.10
  15 -12   0   39.40   15.00
 -12  -3   0   24.10   11.80
   0 -15   0   64.89   27.90
   0 -15   0   57.79   17.30
  15   0   0   88.59   19.70
  15   0   0   72.29   14.90
  15   0   0  118.59   25.20
 -15  15   0   40.50   15.90
 -15  15   0   76.19   15.20
 -15  15   0   50.29   28.30
 -15  15   0   47.60   19.10
  15   0   0   67.09   16.20
   0 -15   0   80.69   19.50
   0 -15   0   82.49   15.30
  15 -15   0   72.09   17.60
 -15   0   0   85.09   18.90
   0  15   0   65.79   14.20
  15 -15   0   84.29   20.50
  15 -15   0   31.10   28.10
 -15   0   0   78.99   14.60
   0  15   0   46.00   18.80
   0  15   0   90.79   16.90
   0  15   0  109.49   21.80
 -15   0   0   94.09   23.80
 -16   2   0   31.70   13.90
 -16   2   0   32.90   16.60
   2  14   0   -1.70   21.00
   2  14   0   46.40   20.10
 -16   2   0   21.50   25.50
   2  14   0   36.50   13.30
  14 -16   0   30.10   16.50
  14 -16   0   32.20   15.70
   2  14   0   43.00   13.30
 -16   2   0   37.40   17.00
   2  14   0    4.00   17.60
  16  -2   0   46.20   30.50
  16  -2   0   44.50   17.90
  -2 -14   0   40.20   12.10
 -14  16   0   21.40   18.70
  16  -2   0   45.00   15.60
  -2 -14   0    1.10   14.50
 -14  16   0    8.30   28.10
  -2 -14   0   34.10   28.60
 -14  16   0   19.60   15.20
  -2 -14   0   81.19   20.40
 -14  16   0   25.70   14.80
   5  11   0   65.19   30.20
 -16   5   0   55.19   13.60
 -16   5   0   61.99   18.00
   5  11   0   41.70   17.00
 -16   5   0   76.09   26.70
  11 -16   0   72.89   17.60
   5  11   0   88.99   19.80
   5  11   0   77.89   17.90
 -16   5   0   71.89   15.70
  11 -16   0   83.49   17.20
   5  11   0   76.79   13.20
  11 -16   0   86.09   33.10
   5  11   0   68.89   14.20
  -5 -11   0   72.29   29.10
 -11  16   0   83.59   21.30
 -11  16   0   67.09   20.40
 -11  16   0   50.69   19.40
  16  -5   0   43.20   16.30
  -5 -11   0   79.89   10.90
 -11  16   0   91.59   16.10
  -5 -11   0   80.59   18.00
  16  -5   0   71.79   13.10
 -11  16   0   38.60   13.60
  -5 -11   0   40.00   15.70
  16  -5   0   52.19   13.60
  16  -5   0   79.89   17.30
   8   8   0   81.19   17.70
   8   8   0   59.29   24.00
 -16   8   0   47.00   12.50
   8 -16   0   59.99   15.50
 -16   8   0   79.59   28.20
   8   8   0   75.99   15.40
   8   8   0   68.19   15.40
   8 -16   0   61.09   15.30
   8   8   0   41.60   16.90
 -16   8   0   70.09   18.20
   8   8   0  102.79   27.90
   8 -16   0   86.19   16.10
  -8  -8   0   50.49   17.10
  -8  16   0   49.40   12.20
  -8  -8   0   64.19   15.10
  -8  16   0   66.99   17.30
  16  -8   0   43.50   16.00
  -8  16   0   54.19   19.20
  -8  16   0   54.09   13.80
  16  -8   0   53.79   14.10
  16  -8   0   45.00   10.90
  16  -8   0   89.99   16.50
  -8  -8   0   60.89    8.60
  -8  -8   0   76.09   26.90
   5 -16   0   80.39   16.10
  11   5   0   54.49   17.40
   5 -16   0   70.69   16.70
  11   5   0   64.59   18.80
 -16  11   0   84.79   16.10
 -16  11   0   85.09   18.50
  11   5   0   73.09   27.20
   5 -16   0   62.59   24.20
 -16  11   0   79.99   18.10
  11   5   0   66.79   27.50
  11   5   0   48.00   13.70
   5 -16   0   76.79   16.60
  11   5   0   67.39   14.40
  -5  16   0   57.29   13.00
 -11  -5   0   32.20   14.20
  -5  16   0   77.39   18.80
  16 -11   0   65.89   19.80
 -11  -5   0   65.29   26.80
 -11  -5   0   73.59   17.50
 -11  -5   0   74.79    9.00
  16 -11   0   46.00   15.20
  -5  16   0   89.09   20.80
  -5  16   0   62.79   19.70
  16 -11   0   93.39   17.50
  16 -11   0   72.69   15.60
  -5  16   0   77.59   15.50
 -16  14   0   25.60   16.40
  14   2   0   51.89   20.40
   2 -16   0   20.90   23.50
  14   2   0    9.60   13.20
 -16  14   0   37.10   19.20
  14   2   0   27.60   13.00
   2 -16   0   27.40   16.00
  14   2   0   35.60   34.40
 -16  14   0   45.50   15.60
   2 -16   0   20.60   16.00
   2 -16   0   14.80   12.70
  -2  16   0   37.70   15.60
  -2  16   0   36.50   19.00
  16 -14   0    2.60   16.70
  -2  16   0   25.90   18.10
 -14  -2   0   28.20    9.10
  -2  16   0   18.20   12.30
  16 -14   0   14.90   15.70
  -2  16   0   91.29   37.00
 -14  -2   0   21.30   14.90
  16 -14   0   43.00   27.60
 -14  -2   0   58.39   18.80
 -17   4   0    9.60   15.70
  13 -17   0    0.90   16.80
   4  13   0    9.00   16.90
 -17   4   0   15.70   28.70
 -17   4   0   50.09   19.10
  13 -17   0  -26.60   26.40
   4  13   0   17.70   13.10
   4  13   0   27.70   18.60
 -17   4   0   20.60   15.10
   4  13   0   30.10   12.60
  13 -17   0   11.00   15.10
  17  -4   0   34.50   21.80
  17  -4   0   24.20   14.10
  -4 -13   0    5.10   16.40
  -4 -13   0   10.30   28.40
  -4 -13   0   29.60   11.00
 -13  17   0    5.20   15.90
 -13  17   0   36.80   15.30
 -13  17   0   38.90   18.90
  17  -4   0   10.90   14.80
  -4 -13   0  -14.00   18.20
  17  -4   0   -6.70   17.40
   7  10   0   20.40   18.50
  10 -17   0   28.60   14.90
 -17   7   0   18.80   13.30
  10 -17   0    9.60   15.00
 -17   7   0   16.10   30.20
 -17   7   0   13.00   16.10
  10 -17   0    2.00   15.50
  10 -17   0   17.20   26.10
   7  10   0   25.90   13.40
   7  10   0   -0.80   14.50
   7  10   0   28.20   33.70
   7  10   0    9.70   17.30
  17  -7   0   49.99   17.50
  17  -7   0   15.90   16.40
 -10  17   0    2.30   19.00
  -7 -10   0   13.50    8.50
  17  -7   0   14.30   13.40
  -7 -10   0   13.20   14.40
  -7 -10   0   19.40   13.80
  -7 -10   0   24.70   26.00
 -10  17   0   27.60   22.90
 -10  17   0   13.50   13.30
 -10  17   0   42.30   17.90
  17  -7   0    6.20   10.80
 -10  17   0    8.20   11.70
 -17  10   0   19.00   15.90
   7 -17   0  -19.40   13.70
  10   7   0  -12.00   17.50
  10   7   0    8.70   17.20
  10   7   0   11.10   12.90
  10   7   0    0.40   22.90
  10   7   0   19.40   31.10
   7 -17   0   24.80   14.70
  10   7   0  -12.00   12.70
 -17  10   0   15.10   12.30
   7 -17   0    1.70   13.40
 -17  10   0   23.50   28.80
 -10  -7   0   22.00   13.80
 -10  -7   0   -2.50    6.90
  -7  17   0   -5.50   11.90
  -7  17   0   -7.80   11.90
  17 -10   0   15.00   12.90
 -10  -7   0   17.10   15.30
  -7  17   0   14.40   18.20
 -10  -7   0   45.50   27.20
  -7  17   0   19.60   17.10
  17 -10   0  -31.90   14.30
   4 -17   0   42.20   17.10
  13   4   0   35.40   33.60
 -17  13   0   -9.30   32.50
 -17  13   0   18.40   16.60
   4 -17   0   36.60   18.40
  13   4   0  -22.20   19.40
 -17  13   0    1.70   14.00
  13   4   0   19.50   14.30
   4 -17   0   11.30   14.90
 -17  13   0  -12.70   16.60
  13   4   0   20.40   13.90
 -13  -4   0   18.00   16.10
  -4  17   0   31.90   29.60
 -13  -4   0   45.40   29.30
  17 -13   0    6.10   14.20
  17 -13   0   14.70   17.70
  -4  17   0   -1.80   12.60
  17 -13   0   31.50   24.60
  -4  17   0  -15.20   13.30
  -4  17   0    3.10   18.70
 -13  -4   0   13.80   16.40
  -4  17   0    1.40   18.70
 -13  -4   0    4.40    7.80
 -18   6   0  419.36   36.10
  12 -18   0  293.67   36.40
   6  12   0  361.16   33.10
  12 -18   0  319.57   38.10
   6  12   0  342.67   37.00
  12 -18   0  369.56   47.00
   6  12   0  289.77   35.80
 -18   6   0  359.96   36.60
   6  12   0  339.97   28.70
 -12  18   0  313.77   39.90
  18  -6   0  383.36   29.80
  -6 -12   0  409.56   40.20
  -6 -12   0  337.87   34.80
  -6 -12   0  387.86   48.90
  -6 -12   0  370.36   26.50
 -12  18   0  352.66   31.30
  18  -6   0  384.26   39.10
 -12  18   0  334.17   34.00
  18  -6   0  355.06   36.20
   9 -18   0  -39.20   28.60
   9   9   0    7.40   12.70
   9   9   0  -11.00   15.60
 -18   9   0   12.90   15.60
   9   9   0    8.80   18.30
   9 -18   0    0.50   16.70
 -18   9   0   16.00   32.20
   9 -18   0   14.70   17.10
   9 -18   0    6.90   15.40
 -18   9   0   31.20   17.80
  -9  -9   0    0.70    8.30
  -9  18   0   12.30   13.40
  -9  -9   0  -14.90   17.30
  -9  18   0  -19.00   12.80
  18  -9   0   10.50   19.90
  18  -9   0  -16.10   14.70
  -9  -9   0  -15.20   27.20
  -9  -9   0    8.20   17.20
   6 -18   0  352.86   35.10
  12   6   0  330.87   41.00
  12   6   0  342.47   34.40
 -18  12   0  326.97   38.30
  12   6   0  368.96   48.00
   6 -18   0  433.56   39.90
 -18  12   0  427.86   54.49
 -18  12   0  407.76   35.70
  12   6   0  316.67   33.40
  -6  18   0  396.36   31.80
  -6  18   0  377.26   34.80
  18 -12   0  351.36   36.50
 -12  -6   0  376.76   37.50
  -6  18   0  377.66   40.90
  18 -12   0  361.56   42.30
 -12  -6   0  364.16   39.30
 -12  -6   0  333.07   47.30
  18 -12   0  345.27   38.70
  -1   0  -1   -0.20    0.40
   1  -1  -1    0.50    0.60
  -1   0  -1   -1.50    1.40
  -1   0  -1   -1.30    1.50
   0   1  -1   -0.80    1.30
  -1   0  -1    1.50    1.90
   0   1  -1   -0.40    0.80
   1  -1  -1    0.00    0.50
   1  -1  -1   -0.10    0.30
   0   1  -1   -1.00    0.90
   0   1  -1    0.10    0.80
  -1   0  -1   -1.00    0.50
   1  -1  -1   -0.10    0.60
   1  -1  -1    0.00    0.70
   0   1  -1    1.70    0.80
   0   1  -1   -0.50    2.90
   1  -1  -1    2.40    2.20
   1  -1  -1    0.00    0.60
  -1   0  -1   -0.30    0.40
   1  -1  -1    1.30    2.50
   0  -1   1    0.30    0.70
   0  -1   1    1.00    0.90
   0  -1   1    1.20    0.80
  -1   1   1   -0.60    0.70
  -1   1   1    0.00    2.10
   1   0   1    0.20    0.50
  -1   1   1   -0.70    0.70
   0  -1   1   -0.90    0.80
  -1   1   1    0.40    0.60
  -1   1   1   -0.20    0.60
   0  -1   1    0.10    0.70
   1   0   1    0.80    1.80
  -1   1   1    2.00    2.40
  -1   1   1   -0.10    0.40
   1   0   1   -1.60    1.30
  -1   1   1    0.60    0.70
   1   0   1    0.80    2.20
   1   0   1    0.30    0.50
   1   0   1    0.00    0.50
   0  -1   1   -1.90    2.90
  -1   3  -1  577.64   25.60
  -2  -1  -1  554.44   27.70
   3  -2  -1  547.25   25.30
  -1   3  -1  516.65   25.30
  -2  -1  -1  616.54   25.70
  -2  -1  -1  561.94   24.90
  -2  -1  -1  569.14   24.90
  -1   3  -1  557.14   26.40
   3  -2  -1  555.54   25.80
  -2  -1  -1  555.94   25.70
  -1   3  -1  531.75   25.60
   3  -2  -1  558.34   25.30
   3  -2  -1  516.55   27.50
  -1   3  -1  556.04   24.40
  -2  -1  -1  591.44   25.00
  -2  -1  -1  542.65   27.80
  -1   3  -1  554.54   25.70
   3  -2  -1  551.04   25.60
   3  -2  -1  585.14   25.40
  -1   3  -1  593.94   26.30
   1  -3   1  541.65   24.40
   2   1   1  582.94   25.00
   1  -3   1  524.75   24.50
   2   1   1  570.14   25.10
  -3   2   1  497.95   27.10
  -3   2   1  534.05   25.30
   2   1   1  589.14   25.30
   2   1   1  590.64   27.60
   1  -3   1  545.95   25.60
  -3   2   1  535.55   25.30
  -3   2   1  530.75   25.60
   1  -3   1  560.44   26.20
   1  -3   1  509.55   25.30
   1  -3   1  544.55   25.70
  -3   2   1  628.84   25.60
   2   1   1  602.74   25.60
   2   1   1  567.54   25.00
   1  -3   1  535.05   25.40
   1  -3   1  585.44   26.50
   2   1   1  621.34   28.60
  -3   2   1  546.75   25.80
   2   0  -1    0.80    0.70
  -2   2  -1   -0.50    1.10
   2   0  -1    0.20    1.50
   0  -2  -1    0.10    0.80
   0  -2  -1    1.20    2.30
   0  -2  -1    0.50    1.10
   0  -2  -1    2.10    2.20
  -2   2  -1   -0.50    1.20
   2   0  -1    1.00    1.40
  -2   2  -1    1.10    1.10
   0  -2  -1    2.50    3.10
   2   0  -1   -0.10    0.90
   2   0  -1   -2.40    3.00
   2   0  -1   -0.30    0.80
  -2   2  -1    0.80    1.10
   0  -2  -1   -0.50    1.00
   0  -2  -1    0.80    0.80
  -2   2  -1   -0.40    0.80
   2   0  -1    1.60    1.00
  -2   2  -1   -0.50    1.10
  -2   2  -1   -0.10    0.90
   0   2   1    0.20    1.20
   2  -2   1   -0.50    1.30
   0   2   1    0.40    1.00
   0   2   1    1.50    2.10
  -2   0   1    0.60    1.30
  -2   0   1    0.20    0.60
   2  -2   1   -0.40    1.10
   2  -2   1    0.00    1.00
   0   2   1   -0.40    1.20
   0   2   1   -0.10    1.10
  -2   0   1   -3.90    2.90
   0   2   1    1.20    0.90
   0   2   1    3.20    2.80
   0   2   1    0.40    1.00
   2  -2   1    0.50    1.10
  -2   0   1   -0.80    0.90
  -2   0   1    0.30    1.00
   0   2   1    0.40    1.00
   0   2   1    2.10    2.40
   2  -2   1   -0.80    1.10
  -2   0   1    0.40    1.10
  -2   0   1    0.10    1.40
   2  -2   1    0.20    1.00
  -3  -2  -1   10.20    1.20
  -2   5  -1   14.80    2.50
  -3  -2  -1   12.30    5.40
   5  -3  -1    8.60    3.10
   5  -3  -1    9.50    2.70
  -3  -2  -1   10.00    5.10
  -3  -2  -1    9.50    2.60
  -2   5  -1    9.40    2.90
  -2   5  -1    8.10    3.40
  -2   5  -1   11.40    3.20
   5  -3  -1   15.20    4.30
   5  -3  -1    4.50    2.30
   5  -3  -1    7.50    4.80
  -3  -2  -1   11.10    2.80
  -2   5  -1    6.70    3.70
   5  -3  -1    7.00    3.50
  -3  -2  -1    8.20    2.80
  -2   5  -1   15.90    3.60
  -3  -2  -1    9.90    2.40
  -3  -2  -1   16.10    3.50
  -2   5  -1    9.10    4.00
  -5   3   1    8.50    3.40
  -5   3   1   13.80    3.80
   2  -5   1   11.90    4.10
  -5   3   1   12.20    3.30
   2  -5   1   16.10    3.50
   2  -5   1    5.20    3.30
  -5   3   1   11.20    3.00
   2  -5   1    9.20    4.00
   3   2   1   10.40    3.00
   3   2   1    7.00    2.90
   3   2   1   17.40    6.20
   3   2   1    8.60    4.00
   2  -5   1    8.40    2.70
  -5   3   1    6.60    4.00
   2  -5   1   10.10    2.20
   3   2   1    9.00    2.50
   2  -5   1   10.40    3.10
   3   2   1   12.90    3.20
  -5   3   1   14.20    3.60
  -3   1  -1  596.84   25.60
  -3   1  -1  561.74   25.40
  -3   1  -1  566.84   24.90
   1   2  -1  523.05   29.20
   2  -3  -1  567.14   28.20
   2  -3  -1  631.24   25.50
   2  -3  -1  630.74   26.00
   1   2  -1  570.74   25.90
   2  -3  -1  599.94   25.70
   1   2  -1  546.85   25.90
   1   2  -1  592.84   26.70
   2  -3  -1  588.44   25.60
   1   2  -1  550.04   26.00
   1   2  -1  499.05   25.70
   2  -3  -1  561.04   26.00
   1   2  -1  538.75   25.60
  -3   1  -1  583.24   28.90
  -3   1  -1  614.74   25.60
  -1  -2   1  499.25   28.70
   3  -1   1  567.24   25.70
  -2   3   1  555.44   28.10
   3  -1   1  587.44   25.00
  -2   3   1  567.54   25.60
  -1  -2   1  569.24   26.10
  -2   3   1  590.44   27.90
  -2   3   1  542.55   25.60
  -1  -2   1  523.15   26.00
   3  -1   1  604.44   25.80
  -2   3   1  547.45   25.90
  -2   3   1  553.54   26.00
  -1  -2   1  547.65   25.60
  -2   3   1  544.45   25.60
  -1  -2   1  544.85   25.80
   3  -1   1  592.14   25.50
  -1  -2   1  546.65   26.50
   3  -1   1  569.74   25.50
  -2   3   1  615.04   25.90
   3  -1   1  546.95   28.50
  -1  -2   1  544.65   25.70
  -2   3   1  609.34   25.70
   4  -1  -1  208.98   11.20
  -1  -3  -1  210.88    9.80
  -1  -3  -1  211.88   11.00
   4  -1  -1  206.28   11.30
  -3   4  -1  209.88   11.60
  -3   4  -1  231.08   10.90
  -3   4  -1  200.18   11.30
  -1  -3  -1  205.38   11.30
  -3   4  -1  207.48   12.30
   4  -1  -1  189.98   10.00
  -1  -3  -1  221.08   11.30
   4  -1  -1  207.98   11.30
  -3   4  -1  201.98   11.40
  -3   4  -1  208.18   11.20
   4  -1  -1  203.88   11.80
  -1  -3  -1  211.88   10.90
   3  -4   1  205.08   11.60
   1   3   1  195.58   10.40
   1   3   1  226.98   11.90
   1   3   1  208.38   11.10
   3  -4   1  206.38   11.40
  -4   1   1  191.68   11.80
   3  -4   1  217.18   10.70
   3  -4   1  209.38   12.20
   1   3   1  201.68   11.10
   1   3   1  200.78   11.90
  -4   1   1  202.68   11.30
  -4   1   1  239.98   11.90
  -4   1   1  187.28   13.10
  -4   1   1  198.38   11.20
   1   3   1  218.58   14.40
   3  -4   1  204.78   11.80
   1   3   1  215.38    9.80
  -4  -3  -1 1208.18   55.19
   7  -4  -1 1116.79   50.89
  -3   7  -1 1167.78   51.99
  -4  -3  -1 1156.58   50.29
  -4  -3  -1 1130.19   50.09
  -3   7  -1 1107.99   50.39
  -3   7  -1  959.10   51.39
   7  -4  -1 1068.19   52.59
  -4  -3  -1 1143.39   50.19
  -3   7  -1  950.50   51.79
  -3   7  -1 1102.89   49.00
  -4  -3  -1 1174.68   49.90
  -3   7  -1 1105.99   48.80
  -3   7  -1 1100.29   50.79
   7  -4  -1 1027.00   49.90
   7  -4  -1  995.00   51.49
  -3   7  -1  941.51   50.59
   7  -4  -1 1128.29   50.09
  -4  -3  -1 1037.70   51.59
  -4  -3  -1 1102.39   46.70
   3  -7   1 1134.09   50.39
   4   3   1 1090.89   50.59
   3  -7   1 1080.89   48.60
  -7   4   1 1113.49   50.19
  -7   4   1 1081.69   50.29
   4   3   1 1150.68   49.80
   4   3   1 1081.09   49.90
   3  -7   1 1188.38   51.79
  -7   4   1 1052.79   50.79
   3  -7   1 1079.59   50.49
  -7   4   1 1094.79   49.90
   3  -7   1 1107.39   50.59
   4   3   1 1003.80   53.59
   4   3   1 1141.09   50.29
   3  -7   1 1062.59   49.30
   3  -7   1 1003.10   49.40
  -7   4   1 1098.99   51.59
  -7   4   1 1050.69   50.49
   4   3   1 1079.49   49.50
   3  -7   1 1128.09   51.99
   0   4  -1    1.40    2.80
  -4   0  -1   -2.00    1.40
   4  -4  -1    0.50    1.50
   0   4  -1   -1.90    1.30
   0   4  -1    0.00    2.00
   0   4  -1   -1.50    2.00
  -4   0  -1   -1.30    1.90
   4  -4  -1   -0.30    2.20
   4  -4  -1    4.50    2.80
  -4   0  -1    1.10    1.50
  -4   0  -1    0.30    1.10
   4  -4  -1    2.60    2.10
  -4   0  -1    3.40    2.20
   0   4  -1   -1.70    2.10
  -4   0  -1   -0.20    1.80
   0   4  -1    5.00    2.60
   4  -4  -1    0.80    2.10
   0   4  -1    0.00    3.10
  -4   4   1    0.70    3.60
  -4   4   1    1.20    2.60
   4   0   1    0.70    4.60
   4   0   1   -1.00    2.20
  -4   4   1    0.70    2.40
   0  -4   1    2.60    2.50
   0  -4   1    0.00    2.50
   4   0   1    1.00    2.30
   0  -4   1    1.70    2.00
  -4   4   1   -3.10    4.50
   4   0   1    0.70    2.10
  -4   4   1    0.00    1.90
   0  -4   1   -0.40    2.30
   0  -4   1    2.50    3.10
  -4   4   1   -2.20    2.50
   4   0   1    1.30    1.60
   0  -4   1    3.00    2.70
   0  -4   1   -3.90    4.90
   4   0   1    2.10    2.10
  -4   4   1   -1.50    1.80
   1  -4  -1  201.98   14.10
   3   1  -1  195.98   14.70
   3   1  -1  229.98   10.70
  -4   3  -1  208.18   11.50
   3   1  -1  182.58   11.00
  -4   3  -1  212.68   11.30
   1  -4  -1  219.58   11.70
  -4   3  -1  202.78   11.00
   3   1  -1  185.18   11.40
   1  -4  -1  197.88   11.00
  -4   3  -1  213.88   11.40
   1  -4  -1  214.68   10.90
   1  -4  -1  221.68   11.30
   3   1  -1  199.98   11.20
   1  -4  -1  211.68   10.90
   3   1  -1  186.38   10.50
   1  -4  -1  206.48   11.00
   1  -4  -1  211.88   11.10
  -4   3  -1  214.48   11.30
  -4   3  -1  211.88   10.80
  -1   4   1  187.08   13.70
  -1   4   1  205.08   11.20
  -3  -1   1  202.78   10.50
  -1   4   1  215.68   11.20
   4  -3   1  185.28   11.20
   4  -3   1  195.98   10.90
  -1   4   1  218.48   10.60
  -3  -1   1  189.68   11.10
   4  -3   1  216.98   12.00
  -1   4   1  240.48   11.70
   4  -3   1  172.08   11.80
  -3  -1   1  188.18   11.90
  -3  -1   1  201.18   11.30
   4  -3   1  242.98   11.50
   4  -3   1  201.98   11.10
  -1   4   1  214.98   12.50
  -1   4   1  197.28   11.70
  -4   6  -1  294.07   16.30
  -2  -4  -1  274.67   15.70
  -4   6  -1  285.07   16.00
  -4   6  -1  276.27   16.10
   6  -2  -1  321.37   17.00
   6  -2  -1  266.27   14.20
  -2  -4  -1  280.27   16.00
   6  -2  -1  303.07   16.00
  -4   6  -1  314.57   15.30
  -2  -4  -1  289.37   13.50
  -4   6  -1  280.07   14.90
  -2  -4  -1  291.57   15.70
  -2  -4  -1  285.07   15.60
   6  -2  -1  317.87   16.10
   6  -2  -1  278.27   16.70
  -2  -4  -1  310.57   15.70
  -4   6  -1  299.77   15.90
  -2  -4  -1  294.67   19.80
   6  -2  -1  272.57   15.60
  -6   2   1  290.77   16.40
   4  -6   1  263.07   17.10
   2   4   1  282.87   15.40
   4  -6   1  296.67   16.40
  -6   2   1  258.77   15.50
   2   4   1  292.97   13.50
  -6   2   1  266.77   17.40
   2   4   1  287.67   18.90
   4  -6   1  290.17   16.10
  -6   2   1  268.67   16.60
  -6   2   1  281.17   15.90
  -6   2   1  293.27   16.20
   2   4   1  298.27   16.00
   4  -6   1  302.17   15.90
   4  -6   1  297.47   17.40
   2   4   1  290.77   16.80
   4  -6   1  293.57   16.40
   4  -6   1  295.87   15.00
   2   4   1  292.57   15.70
   2   4   1  285.17   15.80
  -5  -4  -1   25.70    6.10
   9  -5  -1   18.40    5.90
   9  -5  -1   23.30    8.20
   9  -5  -1   24.90    8.20
   9  -5  -1   18.10    4.80
  -4   9  -1   35.30    7.50
   9  -5  -1   13.40    6.10
  -4   9  -1   32.30    6.60
   9  -5  -1   25.50    5.80
  -5  -4  -1   22.50    5.20
  -5  -4  -1   24.70    3.00
  -4   9  -1   24.20    5.90
  -4   9  -1   35.50    7.70
  -4   9  -1   23.90    5.40
  -4   9  -1   32.30    5.30
  -5  -4  -1   35.00    6.40
  -5  -4  -1   36.20   10.60
  -4   9  -1   29.10    7.30
  -5  -4  -1   20.50    5.70
  -5  -4  -1   32.90    7.30
   4  -9   1   35.90    7.40
  -9   5   1   28.20    7.50
   5   4   1   18.70    9.70
  -9   5   1   21.90    6.00
  -9   5   1   35.90    6.50
   5   4   1   25.50    5.90
   4  -9   1   26.90    8.90
  -9   5   1   23.70    7.40
   5   4   1   26.60    6.00
   4  -9   1   28.90    6.50
   4  -9   1   26.80    5.20
  -9   5   1   27.20    6.70
   4  -9   1   19.80    7.10
  -9   5   1   21.60    6.60
   5   4   1   25.00    7.10
   5   4   1   28.90    5.30
  -9   5   1   28.60    6.00
   4  -9   1   23.50    5.40
   4  -9   1   28.60    6.00
   5   4   1   30.70    5.90
  -1   6  -1   46.90    6.60
  -5  -1  -1   48.70    6.20
  -1   6  -1   43.10    5.70
  -1   6  -1   61.39    7.90
  -5  -1  -1   40.30    9.00
  -5  -1  -1   56.99    5.90
   6  -5  -1   60.69    6.50
  -1   6  -1   64.29    7.60
  -5  -1  -1   55.99    6.70
   6  -5  -1   53.59    8.90
   6  -5  -1   52.29    6.90
   6  -5  -1   56.39    6.40
   6  -5  -1   59.69    6.40
  -5  -1  -1   55.19    5.80
  -1   6  -1   52.19    7.70
  -1   6  -1   44.60    5.70
   5   1   1   58.79   10.80
   1  -6   1   60.79    8.60
   1  -6   1   46.70    6.80
   1  -6   1   59.89    7.40
   5   1   1   46.10    5.60
   1  -6   1   61.39    7.40
  -6   5   1   59.99    7.60
  -6   5   1   59.79    7.60
  -6   5   1   63.29    8.60
   5   1   1   61.79    6.00
  -6   5   1   59.79    7.30
   5   1   1   61.29    6.90
  -6   5   1   57.89    7.00
   1  -6   1   57.09    6.00
   1  -6   1   65.19    7.20
   1  -6   1   55.09    6.40
   5   1   1   52.19    6.60
  -6   5   1   63.09    6.60
  -6   5   1   55.59    6.10
   1  -6   1   41.90    9.70
   5   1   1   45.50    5.30
   2   3  -1    8.50    3.40
   3  -5  -1   14.00    3.20
   2   3  -1   10.70    2.50
  -5   2  -1    7.50    3.00
  -5   2  -1   12.30    6.40
   3  -5  -1   13.30    3.50
  -5   2  -1    9.70    2.70
  -5   2  -1   14.20    4.10
   3  -5  -1    8.80    3.50
   2   3  -1   10.50    3.70
   2   3  -1   18.80    6.60
   2   3  -1   11.40    3.00
  -5   2  -1    9.80    2.30
  -5   2  -1    5.10    2.20
   3  -5  -1   11.80    3.10
   3  -5  -1    9.10    2.80
   2   3  -1    8.50    2.60
   2   3  -1   12.70    3.40
   3  -5  -1    7.90    2.70
   3  -5  -1   11.40    5.10
   5  -2   1    7.50    2.50
   5  -2   1    6.90    2.70
  -3   5   1    9.90    2.90
  -3   5   1   13.50    4.00
  -3   5   1    5.00    5.00
  -2  -3   1   10.50    3.50
  -2  -3   1    7.10    2.60
  -3   5   1   14.90    3.40
  -3   5   1    8.50    3.00
   5  -2   1   15.10    3.70
  -2  -3   1   10.50    3.30
  -3   5   1   13.30    3.80
   5  -2   1    9.80    1.50
   5  -2   1    4.60    2.40
  -2  -3   1   13.40    5.60
  -2  -3   1   12.90    4.10
  -3   5   1   14.00    3.30
  -3   5   1   10.90    3.30
  -2  -3   1    9.30    2.90
   5  -2   1    6.20    3.00
   5  -2   1    8.10    3.20
   0  -5  -1    5.10    3.40
   5   0  -1   -0.50    2.80
   5   0  -1   -0.20    1.70
  -5   5  -1    0.40    2.40
  -5   5  -1    0.60    2.70
  -5   5  -1   -0.60    2.50
   5   0  -1    1.80    3.10
   5   0  -1    3.70    2.70
   0  -5  -1    2.90    5.20
  -5   5  -1   -0.50    2.20
   0  -5  -1   -2.20    2.20
   0  -5  -1    3.30    2.40
  -5   5  -1    0.30    3.00
   5   0  -1    3.60    3.50
   0  -5  -1   -0.50    1.90
   0  -5  -1    5.10    2.90
   0  -5  -1    0.40    2.50
   5   0  -1    0.30    1.80
  -5   5  -1   -5.50    2.70
   5  -5   1   -1.60    2.40
   0   5   1    1.30    2.80
  -5   0   1    2.90    2.00
   5  -5   1   -1.30    2.80
  -5   0   1   -2.10    2.40
   0   5   1    3.00    2.50
   0   5   1    1.30    2.00
   0   5   1    0.50    1.70
   5  -5   1   -0.70    2.60
  -5   0   1   -0.90    3.20
  -5   0   1    2.30    2.60
   5  -5   1    0.00    2.40
  -5   0   1   -1.60    3.60
   0   5   1    8.50    5.80
   0   5   1    2.70    3.40
  -5   0   1    3.10    3.20
   5  -5   1    1.10    2.90
   0   5   1    1.50    2.30
   8  -3  -1   11.60    4.60
  -5   8  -1   14.60    4.40
   8  -3  -1   13.80    6.40
   8  -3  -1   23.30    6.20
  -5   8  -1   16.80    4.90
  -5   8  -1   15.10    5.20
   8  -3  -1   12.70    3.50
  -3  -5  -1   20.40    5.80
  -5   8  -1   21.10    6.10
  -3  -5  -1   12.50    2.50
   8  -3  -1   19.40    5.20
  -3  -5  -1   14.70    4.80
  -3  -5  -1   15.50    8.40
  -5   8  -1   15.60    4.80
  -3  -5  -1   25.50    5.30
  -3  -5  -1   24.40    5.20
  -3  -5  -1   15.60    4.80
  -5   8  -1   16.40    5.40
   8  -3  -1   14.20    5.10
   5  -8   1   16.60    5.00
   3   5   1   12.50    9.00
   3   5   1   19.00    6.50
   5  -8   1   21.30    5.40
  -8   3   1   20.80    6.50
   3   5   1   16.00    4.40
   3   5   1   17.50    4.70
   3   5   1   14.40    3.60
   5  -8   1   19.60    4.50
   3   5   1   10.50    4.40
   3   5   1   11.20    4.70
   5  -8   1   19.30    6.60
   5  -8   1    2.90    6.20
  -8   3   1   14.20    5.40
  -8   3   1   18.90    7.50
  -8   3   1   13.50    5.30
   3   5   1   14.60    2.70
  -8   3   1   15.70    4.70
   5  -8   1   14.20    5.40
   5  -8   1   11.30    4.40
  -8   3   1   14.90    5.80
  -8   3   1   10.10    3.60
  -5  11  -1   -6.90    7.30
  -5  11  -1   13.90    6.70
  -6  -5  -1    4.20    5.40
  -6  -5  -1   14.40    6.50
  -5  11  -1    7.80    5.50
  11  -6  -1    7.20    7.20
  -6  -5  -1    4.60    7.20
  -6  -5  -1   14.60    6.60
  -6  -5  -1    8.30   11.20
  11  -6  -1    9.30    6.80
  11  -6  -1    2.70    9.20
  -5  11  -1   -1.70    8.30
  11  -6  -1    7.60    8.80
  -5  11  -1    4.30    6.40
  -6  -5  -1    5.90    2.70
  -6  -5  -1   -4.10    5.80
  11  -6  -1    8.90    4.70
  11  -6  -1    8.40    6.40
  -5  11  -1   15.40    5.90
  -5  11  -1    6.30    6.70
   5 -11   1    3.50    7.10
   5 -11   1    0.10    4.80
 -11   6   1    4.10    4.90
   6   5   1    9.90    5.60
   5 -11   1    7.40    5.30
   5 -11   1   11.70    6.40
   6   5   1    2.40    6.10
 -11   6   1   25.40    7.90
   5 -11   1   13.90    8.00
 -11   6   1   10.80    7.30
   6   5   1    6.60    8.20
 -11   6   1    8.40    7.40
   6   5   1    9.50    8.20
   6   5   1   17.20    7.90
 -11   6   1   11.90    8.50
   5 -11   1    6.60    6.70
   6   5   1    7.00    6.00
 -11   6   1   10.90    5.40
   6   5   1   -8.40   12.10
   5 -11   1   11.30    9.90
  -6  -2  -1   32.90    5.80
   8  -6  -1   21.30    4.60
  -2   8  -1   38.60    7.30
  -6  -2  -1   33.60    6.10
  -6  -2  -1   36.00    6.50
  -6  -2  -1   32.20    3.40
   8  -6  -1   41.00    6.50
  -2   8  -1   44.80    5.60
  -2   8  -1   35.80    8.00
   8  -6  -1   27.00    6.20
  -2   8  -1   46.80    7.80
  -6  -2  -1   31.40    6.00
  -2   8  -1   25.10    4.90
  -2   8  -1   22.50    6.90
   8  -6  -1   29.90    5.50
  -6  -2  -1   40.40    9.80
  -6  -2  -1   31.00    9.20
   8  -6  -1   33.10    9.20
  -2   8  -1   33.20    5.90
   8  -6  -1   48.00    7.80
  -8   6   1   44.80    7.20
   6   2   1   28.50    6.20
   2  -8   1   23.10    8.20
  -8   6   1   35.70    7.00
   6   2   1   28.50    5.00
  -8   6   1   36.50    7.50
   6   2   1   36.30    6.10
   6   2   1   32.90    6.00
   2  -8   1   40.70    7.30
   6   2   1   38.80    7.00
   2  -8   1   39.10    5.90
  -8   6   1   34.40    6.60
   2  -8   1   37.30    6.90
   2  -8   1   31.40    7.00
   2  -8   1   44.50    6.80
  -8   6   1   40.70    6.60
   2  -8   1   27.50    7.70
   2  -8   1   43.50   12.10
  -8   6   1   28.60    6.80
   1   5  -1   57.49    6.80
   1   5  -1   69.19    8.60
  -6   1  -1   52.69    6.20
   1   5  -1   56.19    9.50
   1   5  -1   51.29    7.00
  -6   1  -1   57.89    6.80
  -6   1  -1   53.69    6.40
  -6   1  -1   55.99    9.80
   5  -6  -1   55.89    6.60
  -6   1  -1   60.19    4.90
   5  -6  -1   69.59    7.10
   5  -6  -1   56.19    7.20
   5  -6  -1   58.59    6.80
   5  -6  -1   45.10    8.40
   5  -6  -1   53.99    6.60
   5  -6  -1   55.99    7.30
   1   5  -1   51.89    5.90
  -6   1  -1   52.69    5.80
  -1  -5   1   69.79   10.50
  -5   6   1   55.79    7.10
   6  -1   1   54.29    6.00
   6  -1   1   58.99    7.10
  -1  -5   1   49.80    6.50
   6  -1   1   68.09    6.30
  -1  -5   1   53.99    6.70
   6  -1   1   57.99    6.00
   6  -1   1   71.59   11.40
  -5   6   1   43.10    6.20
  -5   6   1   52.19    5.90
  -1  -5   1   50.39    7.70
  -5   6   1   71.19    6.80
  -5   6   1   65.29    6.50
  -1  -5   1   56.09    7.20
   6  -1   1   38.60    5.80
  -5   6   1   41.00    6.40
  -1  -5   1   52.09    5.50
  -6   4  -1  290.37   16.00
   2  -6  -1  314.07   15.90
   4   2  -1  282.87   15.30
   2  -6  -1  284.77   15.60
  -6   4  -1  297.67   15.20
   2  -6  -1  293.87   15.90
   2  -6  -1  305.77   15.70
   2  -6  -1  295.67   15.90
   4   2  -1  265.57   23.10
   4   2  -1  268.37   16.10
   4   2  -1  258.67   16.30
  -6   4  -1  274.37   16.10
  -6   4  -1  280.67   15.70
   4   2  -1  275.77   16.00
   2  -6  -1  289.77   16.90
   4   2  -1  299.07   17.50
   2  -6  -1  322.57   16.10
  -6   4  -1  283.17   16.30
   2  -6  -1  279.57   18.90
  -6   4  -1  304.27   16.30
   6  -4   1  302.87   15.90
  -4  -2   1  291.37   15.30
  -4  -2   1  294.97   16.50
  -2   6   1  326.97   15.40
  -2   6   1  287.97   17.00
  -2   6   1  296.47   15.80
  -2   6   1  289.97   19.40
  -4  -2   1  282.57   16.00
   6  -4   1  279.57   15.70
  -4  -2   1  280.17   14.90
  -2   6   1  299.17   16.20
   6  -4   1  290.87   15.70
  -4  -2   1  263.67   16.80
   6  -4   1  285.37   17.10
   6  -4   1  294.77   15.90
   6  -4   1  289.07   16.40
  -4  -2   1  271.87   16.40
  -2   6   1  312.17   15.80
  -2   6   1  303.07   16.60
  -2   6   1  304.97   16.10
  -6   7  -1   35.40    5.80
   7  -1  -1   46.40    7.60
  -6   7  -1   35.90    6.10
  -1  -6  -1   37.70    5.90
   7  -1  -1   41.20    6.40
  -1  -6  -1   31.50    4.70
  -6   7  -1   39.30    6.40
  -6   7  -1   52.99    8.20
  -1  -6  -1   38.00    6.20
  -6   7  -1   51.99    6.50
   7  -1  -1   45.10    5.40
  -6   7  -1   40.50    8.30
  -1  -6  -1   50.49    7.70
  -1  -6  -1   42.80    6.10
  -1  -6  -1   51.19    7.10
   7  -1  -1   50.19    7.70
   7  -1  -1   42.70    6.60
  -1  -6  -1   30.90    8.70
   7  -1  -1   29.10    5.20
   1   6   1   38.60    5.50
  -7   1   1   31.20    5.00
   1   6   1   34.60    6.90
   1   6   1   39.20    6.30
   6  -7   1   43.60    7.80
   1   6   1   42.90    6.90
   1   6   1   50.89   10.20
   1   6   1   38.30    4.50
   6  -7   1   40.20    6.40
  -7   1   1   45.70    6.80
   6  -7   1   48.70    6.80
  -7   1   1   34.70    6.50
   1   6   1   52.09    7.10
   6  -7   1   53.89    6.60
   6  -7   1   54.19    7.50
  -7   1   1   40.30    7.70
   6  -7   1   39.80    6.20
  -7   1   1   50.19    7.60
  -7   1   1   40.90    7.90
  -4  -6  -1  205.48   16.20
  -6  10  -1  191.78   14.90
  -4  -6  -1  187.48   10.50
  -6  10  -1  186.78   13.40
  10  -4  -1  174.58   16.90
  10  -4  -1  174.58   14.20
  -4  -6  -1  191.38   21.00
  10  -4  -1  190.88   15.00
  10  -4  -1  177.68   12.00
  -4  -6  -1  190.58   14.10
  -4  -6  -1  191.88   14.80
  -6  10  -1  170.08   15.40
  -6  10  -1  204.28   15.90
  -4  -6  -1  198.48   14.70
  -6  10  -1  181.78   14.10
  10  -4  -1  175.28   15.10
  10  -4  -1  164.08   16.30
  -6  10  -1  179.28   14.20
  -4  -6  -1  175.98   14.10
 -10   4   1  175.68   13.90
 -10   4   1  179.18   15.60
   4   6   1  200.18   14.50
   4   6   1  194.18   11.70
   4   6   1  170.58   16.60
   6 -10   1  184.08   12.90
   4   6   1  207.28   22.80
 -10   4   1  182.78   16.10
 -10   4   1  179.18   16.00
   6 -10   1  150.38   15.60
 -10   4   1  212.68   15.40
   6 -10   1  180.98   14.90
 -10   4   1  184.58   15.60
   6 -10   1  202.48   18.50
 -10   4   1  216.58   19.70
   4   6   1  205.28   15.90
   6 -10   1  196.48   15.00
   6 -10   1  184.88   15.90
   6 -10   1  190.38   15.80
   4   6   1  182.68   14.60
  -6  13  -1   32.80   10.40
  -7  -6  -1   26.80    9.80
  -6  13  -1   41.40    9.90
  -6  13  -1   15.10    9.20
  13  -7  -1   22.70    8.90
  13  -7  -1   35.70    9.30
  13  -7  -1   16.60   12.40
  13  -7  -1   25.50   10.50
  -7  -6  -1   25.50    9.50
  -7  -6  -1    7.40   10.40
  13  -7  -1   28.90   14.60
  -7  -6  -1   12.90    5.60
  -7  -6  -1   19.30    9.00
  -6  13  -1   26.10    7.60
  -6  13  -1   30.30   11.50
  -6  13  -1   41.40    9.40
  -7  -6  -1   26.80    9.90
  -6  13  -1   28.90   10.90
  -7  -6  -1   32.40   16.80
   7   6   1   25.40    8.60
   7   6   1   38.60   11.80
   6 -13   1   28.50    9.50
   6 -13   1   17.40    9.10
   6 -13   1   21.30   10.10
   7   6   1   32.60    9.30
   6 -13   1   35.10    8.20
   7   6   1   -6.70   11.10
   6 -13   1   19.90   10.90
   7   6   1   19.10    8.40
 -13   7   1   14.40    9.20
 -13   7   1   32.10   11.00
 -13   7   1   41.20   17.00
 -13   7   1   20.10    9.70
 -13   7   1   12.50    7.30
 -13   7   1    4.90    6.10
   6 -13   1   23.80   15.20
   7   6   1   45.10   17.40
   6 -13   1   28.90    8.80
  -7  -3  -1  277.77   19.00
  -3  10  -1  286.27   23.00
  10  -7  -1  339.47   20.60
  -7  -3  -1  311.27   15.20
  -3  10  -1  297.27   22.70
  -7  -3  -1  313.47   19.40
  10  -7  -1  327.37   20.00
  -7  -3  -1  306.67   20.70
  10  -7  -1  348.07   25.00
  -7  -3  -1  297.97   19.70
  -3  10  -1  315.67   18.00
  -7  -3  -1  342.97   20.50
  -3  10  -1  307.77   19.20
  -3  10  -1  328.57   20.40
  10  -7  -1  318.47   21.60
  -3  10  -1  296.07   20.80
  10  -7  -1  334.17   20.10
  -3  10  -1  322.07   21.80
  10  -7  -1  366.16   23.20
  -7  -3  -1  324.67   26.40
   7   3   1  289.57   21.40
   7   3   1  317.57   19.50
 -10   7   1  345.27   21.30
 -10   7   1  324.97   20.50
   3 -10   1  283.57   18.80
   7   3   1  330.97   20.90
 -10   7   1  357.66   22.00
   7   3   1  311.17   19.70
   3 -10   1  319.57   21.40
   3 -10   1  328.17   21.40
   3 -10   1  291.97   23.40
   3 -10   1  279.47   19.80
 -10   7   1  326.37   22.00
   3 -10   1  352.16   21.20
   7   3   1  303.97   26.00
   7   3   1  328.67   20.00
   3 -10   1  325.57   21.20
 -10   7   1  296.57   23.50
 -10   7   1  323.97   20.10
  -7   0  -1   -0.60    2.30
   7  -7  -1   -2.00    4.20
   7  -7  -1   -3.40    3.90
   0   7  -1   -1.20    3.90
  -7   0  -1    1.00    2.70
   7  -7  -1   -2.60    3.90
   0   7  -1   -1.80    3.90
   0   7  -1   -2.80    2.40
   7  -7  -1   -1.50    4.20
   0   7  -1    8.60    5.10
   7  -7  -1    5.30    6.60
   0   7  -1   -4.10    4.50
   0   7  -1   -2.00    4.70
  -7   0  -1   -9.20    7.00
  -7   0  -1   -0.30    3.50
  -7   0  -1    0.00    3.80
   0   7  -1    1.60    2.90
   7  -7  -1   -6.50    4.90
   0  -7   1    2.60    3.50
   7   0   1    1.80    3.10
   0  -7   1   -2.70    4.00
  -7   7   1    2.00    4.20
   7   0   1    1.20    3.10
   0  -7   1    6.50    4.00
   7   0   1   -3.80    4.80
   0  -7   1    0.10    5.90
  -7   7   1    3.70    3.40
  -7   7   1    3.50    4.60
  -7   7   1    3.60    4.80
   0  -7   1    6.30    4.30
   0  -7   1    4.30    5.80
   7   0   1   -1.90    3.40
  -7   7   1   -2.60    3.60
   7   0   1   -3.10    4.20
   0  -7   1   -2.60    3.00
   0  -7   1   -5.70    7.40
  -7   7   1    2.40    3.80
  -7   3  -1 1165.48   51.59
  -7   3  -1 1147.69   49.90
   4  -7  -1 1024.40   52.39
   3   4  -1 1037.40   51.89
   4  -7  -1 1210.38   51.59
   4  -7  -1 1150.58   52.49
   3   4  -1 1169.88   51.49
  -7   3  -1 1134.49   51.49
   3   4  -1 1051.19   55.39
  -7   3  -1 1053.99   56.29
   4  -7  -1 1117.99   51.49
   4  -7  -1 1163.48   51.39
   4  -7  -1 1164.28   51.59
   4  -7  -1 1149.19   52.59
   3   4  -1 1075.79   52.89
   3   4  -1 1108.69   51.39
  -7   3  -1 1105.89   50.99
  -7   3  -1 1176.08   51.49
   3   4  -1 1060.49   51.49
   4  -7  -1 1205.98   55.69
  -4   7   1 1084.39   50.89
  -4   7   1 1112.29   51.59
  -4   7   1 1150.58   52.79
   7  -3   1 1085.99   51.79
   7  -3   1 1060.69   48.30
  -4   7   1 1157.98   51.29
   7  -3   1 1182.48   51.19
   7  -3   1 1155.38   51.39
  -3  -4   1 1167.88   51.69
  -4   7   1 1186.88   52.49
  -4   7   1 1022.30   54.09
  -3  -4   1 1107.79   50.09
  -3  -4   1 1135.79   51.99
   7  -3   1 1134.79   51.99
  -3  -4   1 1058.39   51.69
  -3  -4   1 1094.59   50.89
  -4   7   1 1099.39   51.19
  -3  -4   1 1059.49   52.49
   1  -7  -1   46.80    6.50
  -7   6  -1   38.20    5.60
   6   1  -1   39.20    6.50
  -7   6  -1   44.90    7.00
   6   1  -1   55.99    8.60
   6   1  -1   44.10    7.10
   6   1  -1   37.80    7.00
   1  -7  -1   47.90    6.70
   1  -7  -1   44.90    9.90
   1  -7  -1   33.40    5.20
   6   1  -1   33.30   10.20
  -7   6  -1   54.89    6.90
  -7   6  -1   45.00    6.60
   1  -7  -1   48.20    6.90
   1  -7  -1   32.70    7.00
   6   1  -1   43.40    6.70
   1  -7  -1   43.80    6.00
  -7   6  -1   35.40    6.30
   6   1  -1   29.20    5.00
   6   1  -1   29.00    4.50
  -6  -1   1   38.70    6.20
   7  -6   1   54.39    7.20
  -6  -1   1   34.80    7.20
   7  -6   1   40.10    6.80
  -6  -1   1   29.90    5.30
  -6  -1   1   48.60    7.00
  -1   7   1   53.59   10.40
  -1   7   1   29.10    4.90
  -1   7   1   46.00    7.00
   7  -6   1   43.90    7.80
  -1   7   1   40.70    6.00
   7  -6   1   24.70    4.60
  -1   7   1   45.70    6.90
  -6  -1   1   41.40    5.50
  -1   7   1   50.69    5.60
   7  -6   1   49.60    7.10
  -6  -1   1   39.00    6.80
   7  -6   1   47.60    6.40
  -1   7   1   41.10    7.60
  -1   7   1   56.89    7.40
  -7   9  -1 1222.48   61.49
  -2  -7  -1 1280.27   59.79
  -2  -7  -1 1310.17   59.39
  -7   9  -1 1248.88   59.89
   9  -2  -1 1363.46   61.19
  -2  -7  -1 1221.98   65.29
  -2  -7  -1 1253.87   56.59
  -7   9  -1 1231.18   58.69
   9  -2  -1 1278.77   59.79
   9  -2  -1 1506.15   60.69
  -2  -7  -1 1283.17   60.39
  -7   9  -1 1168.78   58.69
   9  -2  -1 1402.76   58.09
  -7   9  -1 1248.08   60.19
  -7   9  -1 1288.67   59.19
   9  -2  -1 1316.77   59.79
  -2  -7  -1 1252.67   59.69
  -7   9  -1 1195.88   59.69
  -2  -7  -1 1264.17   59.19
   7  -9   1 1314.77   62.09
   7  -9   1 1153.18   60.99
   2   7   1 1226.28   56.49
   2   7   1 1280.77   59.39
   2   7   1 1280.37   59.89
   2   7   1 1247.78   61.29
  -9   2   1 1222.68   60.29
   7  -9   1 1225.58   60.09
   7  -9   1 1238.68   58.29
   7  -9   1 1221.48   60.39
  -9   2   1 1401.76   63.19
  -9   2   1 1325.17   61.09
   2   7   1 1321.57   60.39
  -9   2   1 1414.16   60.39
   7  -9   1 1252.67   59.89
  -9   2   1 1494.45   61.59
  -9   2   1 1361.06   60.69
   7  -9   1 1170.68   59.39
   2   7   1 1248.98   59.79
  -5  -7  -1   49.60   15.70
  -5  -7  -1   36.30    9.30
  -7  12  -1   25.80    8.40
  -5  -7  -1   26.50    8.00
  -7  12  -1   40.20    8.20
  12  -5  -1   48.10   12.20
  -5  -7  -1   34.50    5.00
  12  -5  -1   36.20    9.20
  12  -5  -1   26.40    6.20
  12  -5  -1   27.70   10.10
  12  -5  -1   34.50    7.30
  -5  -7  -1   30.70    9.00
  -7  12  -1   59.79   12.30
  12  -5  -1   46.10    9.80
  -7  12  -1   21.00    9.20
  -5  -7  -1   33.60    9.30
  -5  -7  -1   54.09    9.60
  -7  12  -1   55.09    9.60
  -7  12  -1   37.00    8.30
   5   7   1   44.30    9.00
   5   7   1   41.60    9.10
   7 -12   1   39.20    7.70
   7 -12   1   34.80   12.20
   7 -12   1   30.50    9.10
   5   7   1   76.59   16.20
   7 -12   1   36.50    9.90
   7 -12   1   44.30   11.40
   5   7   1   21.70    9.20
 -12   5   1   52.49   10.00
   5   7   1   38.40   10.70
 -12   5   1   29.50    9.10
 -12   5   1   43.00    9.50
 -12   5   1   33.70    9.80
   7 -12   1   35.60    9.90
 -12   5   1   31.00   13.90
 -12   5   1   35.80    9.70
   7 -12   1   41.40    9.20
   5   7   1   37.40    8.70
 -12   5   1   54.89   10.50
  15  -8  -1  581.54   35.60
  -7  15  -1  566.14   32.60
  -8  -7  -1  538.95   35.40
  -7  15  -1  594.14   35.90
  -8  -7  -1  503.15   45.90
  -8  -7  -1  590.04   35.50
  -7  15  -1  534.65   53.89
  15  -8  -1  523.05   41.00
  15  -8  -1  567.24   36.50
  -7  15  -1  577.74   38.70
  -8  -7  -1  557.84   39.10
   8   7   1  595.14   34.70
   8   7   1  603.64   39.90
   7 -15   1  564.14   36.60
   8   7   1  607.94   36.00
 -15   8   1  596.54   49.60
   7 -15   1  539.15   36.40
   7 -15   1  526.45   34.70
   8   7   1  574.14   35.90
 -15   8   1  567.84   35.40
 -15   8   1  605.64   49.00
 -15   8   1  512.55   36.10
   8   7   1  563.04   51.39
   7 -15   1  522.25   38.60
   7 -15   1  477.65   32.70
  -8  -4  -1   54.89   11.20
  -4  12  -1   55.39   13.10
  -8  -4  -1   44.10    9.90
  -4  12  -1   50.29   10.30
  12  -8  -1   43.60    8.10
  -4  12  -1   58.69   13.30
  -4  12  -1   60.89   12.30
  -8  -4  -1   63.39   11.20
  12  -8  -1   49.70   11.10
  -4  12  -1   51.19    8.10
  12  -8  -1   45.70    9.50
  -4  12  -1   36.90    9.00
  -8  -4  -1   40.70    8.70
  12  -8  -1   44.50   12.90
  -8  -4  -1   41.50    5.40
  12  -8  -1   47.20   13.90
  -8  -4  -1   37.20    8.30
  -8  -4  -1   62.99   16.80
  -4  12  -1   56.39   10.20
 -12   8   1   58.99   11.20
 -12   8   1   47.60    9.70
   8   4   1   77.49   13.40
   4 -12   1   62.09   13.80
   4 -12   1   35.50    8.50
   4 -12   1   29.20    9.40
   8   4   1   44.10    9.80
   8   4   1   49.90    9.20
   4 -12   1   71.79   11.80
   8   4   1   43.80    8.40
   4 -12   1   55.69   12.00
   8   4   1   46.20   10.80
 -12   8   1   40.50   10.40
   4 -12   1   61.09    9.80
 -12   8   1   36.90    9.90
 -12   8   1   53.89   10.90
   8   4   1   26.90   18.00
  -1   9  -1  457.75   24.30
  -8  -1  -1  407.16   24.00
  -8  -1  -1  449.95   23.60
   9  -8  -1  415.76   23.90
  -1   9  -1  407.06   26.70
  -1   9  -1  445.06   25.40
   9  -8  -1  402.56   24.80
   9  -8  -1  383.66   25.70
  -8  -1  -1  413.56   24.00
  -1   9  -1  406.26   26.00
   9  -8  -1  378.26   23.00
   9  -8  -1  409.66   28.70
  -1   9  -1  383.26   22.60
   9  -8  -1  454.25   24.40
   9  -8  -1  426.36   23.90
  -1   9  -1  415.86   21.70
  -8  -1  -1  431.06   28.80
  -1   9  -1  406.36   24.80
   1  -9   1  380.36   28.30
  -9   8   1  407.06   24.10
   1  -9   1  431.76   22.80
   1  -9   1  406.96   26.00
   8   1   1  391.96   23.20
  -9   8   1  425.86   24.20
   1  -9   1  398.36   24.10
   8   1   1  441.36   23.70
  -9   8   1  394.26   25.40
   1  -9   1  396.16   24.50
   8   1   1  394.86   24.20
   1  -9   1  415.56   24.50
  -9   8   1  421.26   24.20
  -9   8   1  381.06   24.50
   1  -9   1  392.06   26.40
   1  -9   1  419.36   24.20
   8   1   1  439.96   31.30
   8   1   1  427.06   25.20
   8   1   1  395.06   22.90
  -9   8   1  414.96   23.50
  -8   2  -1   46.50   11.30
   6  -8  -1   37.30    7.00
  -8   2  -1   38.80    4.80
   2   6  -1   44.00    7.40
   2   6  -1   22.90    9.00
  -8   2  -1   45.90    7.00
   2   6  -1   35.70    7.20
   6  -8  -1   38.40    7.10
   2   6  -1   41.90    6.70
  -8   2  -1   35.90    6.90
   2   6  -1   45.60    8.20
   2   6  -1   26.70    5.00
  -8   2  -1   28.50    5.20
   6  -8  -1   22.90    8.60
   6  -8  -1   29.60    6.60
   6  -8  -1   29.00    5.90
  -8   2  -1   19.70    4.70
   6  -8  -1   34.40    5.80
   2   6  -1   10.90    5.90
   6  -8  -1   31.30    7.90
  -6   8   1   37.60    6.30
  -2  -6   1   40.10    7.50
   8  -2   1   40.70    7.40
  -6   8   1   36.30    6.70
   8  -2   1   26.50    4.70
  -2  -6   1   28.20    7.80
   8  -2   1   32.30    5.40
   8  -2   1   34.80    7.20
  -6   8   1   31.40    6.00
  -6   8   1   31.00    6.80
   8  -2   1   34.70    5.70
   8  -2   1   24.40    6.20
  -2  -6   1   34.20    6.10
  -2  -6   1   36.10    7.80
  -6   8   1   34.70    6.10
  -2  -6   1   39.70    6.80
  -6   8   1   31.50    5.50
  -2  -6   1   46.60    5.90
  -6   8   1   51.59   10.20
  -2  -6   1   33.90    9.10
  -2  -6   1   50.09    7.60
  -8   5  -1   16.90    9.10
   5   3  -1   18.70    9.50
   3  -8  -1   17.60    4.80
  -8   5  -1   15.30    5.40
   3  -8  -1   19.60    5.30
   3  -8  -1   15.50    4.80
   5   3  -1    9.40    3.90
  -8   5  -1   14.40    5.80
   3  -8  -1   33.80    6.20
   3  -8  -1   16.80    4.90
   5   3  -1   10.90    5.30
  -8   5  -1   11.40    3.90
  -8   5  -1   10.70    5.10
   5   3  -1   13.90    6.40
   3  -8  -1   21.90    7.10
   3  -8  -1    2.70   10.20
   5   3  -1    5.70    4.00
   3  -8  -1   12.40    4.70
   5   3  -1   21.10    5.00
  -8   5  -1   18.50    4.90
   5   3  -1   13.40    5.20
  -3   8   1   15.50    8.30
   8  -5   1   19.30    6.70
  -3   8   1   15.20    5.00
   8  -5   1   18.10    5.30
  -5  -3   1   21.30    5.60
   8  -5   1   17.50    5.50
  -3   8   1   16.60    5.60
  -3   8   1   16.70    3.90
   8  -5   1   23.60    5.30
  -3   8   1   15.00    4.20
   8  -5   1   15.80    4.80
  -5  -3   1    7.50    4.10
  -3   8   1    9.00    5.50
  -3   8   1    4.80    4.60
  -3   8   1   15.40    4.60
   8  -5   1   10.60    4.10
  -5  -3   1   14.50    3.50
  -5  -3   1   14.00    6.40
  -5  -3   1   11.40    4.50
  -8   8  -1   -1.30    4.60
   0  -8  -1  -10.60    7.70
  -8   8  -1    3.40    4.70
  -8   8  -1   -0.30    5.30
  -8   8  -1   -0.80    5.90
   0  -8  -1    1.90    4.20
   0  -8  -1   -1.60    4.60
   0  -8  -1   -0.80    3.30
   0  -8  -1    5.20    6.30
   8   0  -1    1.50    3.20
   8   0  -1    0.20    6.10
   8   0  -1    0.80    5.10
   0  -8  -1   -1.30    4.20
  -8   8  -1   -8.10    5.50
  -8   8  -1    1.90    3.80
   0  -8  -1   -0.30    4.70
   8   0  -1    2.70    6.30
   8   0  -1   -1.10    5.00
   8   0  -1    1.30    3.30
   8  -8   1    9.60    5.90
   0   8   1   -3.00    3.30
   8  -8   1    4.60    6.60
  -8   0   1    3.60    5.40
   0   8   1   -1.90    4.00
   8  -8   1    5.00    5.10
   0   8   1   11.20    8.90
  -8   0   1    5.30    6.70
  -8   0   1   -1.40    6.90
  -8   0   1   -1.60    2.70
   8  -8   1    2.60    4.80
   8  -8   1    6.30    5.20
   0   8   1   -2.60    4.60
   0   8   1    4.60    4.60
  -8   0   1   -0.60    4.60
   0   8   1   -1.90    4.20
   8  -8   1   -1.50    4.80
  -8   0   1   -7.30    5.40
   0   8   1   -3.50    5.40
   0   8   1   -2.20    5.50
  -3  -8  -1   13.90   12.60
  -8  11  -1   -0.40    7.80
  -8  11  -1    3.60    4.90
  -3  -8  -1   -1.20    6.60
  -8  11  -1    9.30    6.10
  -8  11  -1    4.60    8.30
  11  -3  -1   -1.20    3.90
  11  -3  -1    2.70    8.00
  -3  -8  -1    2.90    7.20
  -3  -8  -1   -3.50    6.60
  -8  11  -1    0.60    8.50
  11  -3  -1    8.60    7.20
  -8  11  -1   -1.50    6.50
  11  -3  -1    7.50    6.80
  -3  -8  -1    0.30    3.40
  -3  -8  -1    7.20    6.70
  -8  11  -1    2.80    5.20
  -3  -8  -1   10.60   10.80
  11  -3  -1    2.30    7.20
  11  -3  -1    1.10    4.50
 -11   3   1    4.30    9.50
 -11   3   1   -2.80    8.70
 -11   3   1    5.00    7.50
   3   8   1   10.80    7.20
   8 -11   1    3.70    7.10
   8 -11   1    6.30    7.80
   8 -11   1    8.90   10.20
   3   8   1    8.90    3.80
   3   8   1    3.00    5.80
 -11   3   1    6.20    7.50
 -11   3   1    1.40    6.00
   3   8   1    0.40    5.20
   8 -11   1    2.10    5.70
   8 -11   1   25.90    9.70
 -11   3   1    3.10    5.10
   8 -11   1   -0.80    6.70
   3   8   1  -10.50   12.00
   3   8   1    4.30    7.40
   8 -11   1    6.70    5.90
   3   8   1   10.00    8.60
  -8  14  -1   -2.70   10.20
  14  -6  -1    1.70    5.90
  -6  -8  -1    2.80    7.50
  14  -6  -1   19.90   10.40
  14  -6  -1   14.30   12.20
  -6  -8  -1    4.90    9.60
  -6  -8  -1   -7.10   11.50
  -8  14  -1   -3.30   12.30
  -8  14  -1  -11.90   11.40
  -8  14  -1   -1.10    7.20
  -6  -8  -1   24.00   18.10
  -8  14  -1    0.60    6.60
  -6  -8  -1    0.20    4.40
  14  -6  -1  -13.60    7.30
   6   8   1  -12.10   15.80
   6   8   1  -25.00   19.80
   8 -14   1    7.10    9.00
   6   8   1   22.70   12.00
   6   8   1   -3.30    7.70
 -14   6   1    3.10   17.40
   6   8   1    0.20    8.10
   8 -14   1    7.40   10.00
 -14   6   1  -13.90    9.00
   8 -14   1   -3.00    9.60
   8 -14   1    5.10    8.40
 -14   6   1   13.90    8.70
 -14   6   1    5.30   11.20
 -14   6   1   -5.00   10.10
  17  -9  -1   15.70    9.90
  -9  -8  -1    7.10   28.40
  -8  17  -1    6.90   12.10
  17  -9  -1   46.80   19.40
  17  -9  -1   11.80   13.20
  -8  17  -1   29.80   12.30
  -9  -8  -1   19.70   15.90
 -17   9   1   11.70   16.80
   8 -17   1   41.40   15.70
 -17   9   1   58.69   17.20
   9   8   1   10.10   12.40
   9   8   1   25.00   20.10
   8 -17   1    2.20   14.10
   9   8   1   27.10   14.40
 -17   9   1   -5.40   26.20
   9   8   1   17.30   16.90
   8 -17   1   -6.10   12.80
  -9  -5  -1   44.00    5.20
  -5  14  -1   37.60   13.00
  -5  14  -1   41.80    9.10
  -9  -5  -1   32.50   13.40
  14  -9  -1   24.50   12.50
  14  -9  -1   43.50   11.90
  14  -9  -1   34.60    9.80
  -9  -5  -1   53.19   12.60
  14  -9  -1   34.30   15.50
  -9  -5  -1   27.40   19.70
  -9  -5  -1   26.10    9.50
  -5  14  -1   45.50   14.40
  -5  14  -1   34.60   10.20
   5 -14   1   40.70   11.40
 -14   9   1   13.00   11.90
   5 -14   1   26.80   11.40
   9   5   1   26.90    8.60
 -14   9   1   39.10   13.20
   5 -14   1   31.30   11.10
   9   5   1   20.80   15.20
   9   5   1   25.90    9.30
 -14   9   1   40.80   12.80
   5 -14   1   37.10   10.90
   9   5   1    8.90   22.60
   9   5   1   32.40   10.80
   5 -14   1   35.30   22.30
 -14   9   1   23.70    8.60
   9   5   1   28.40   12.80
  11  -9  -1   23.30    9.20
  -2  11  -1   22.90   10.20
  11  -9  -1   19.00   12.20
  11  -9  -1   34.90    9.60
  -9  -2  -1   41.20   13.30
  11  -9  -1   44.80    9.00
  11  -9  -1   26.20   11.80
  -9  -2  -1   24.30    6.90
  -2  11  -1   30.40    6.50
  -2  11  -1   35.40    7.80
  11  -9  -1   30.20    7.80
  -9  -2  -1   34.00    8.40
  11  -9  -1   39.70    9.00
  -9  -2  -1   30.00    6.50
  -2  11  -1   30.00    9.90
  -2  11  -1   38.60   10.20
  -2  11  -1   43.70    8.90
  -2  11  -1   25.40    9.50
  -9  -2  -1   27.40    8.70
  -9  -2  -1   45.10    9.20
 -11   9   1   33.70    9.80
   2 -11   1   42.90   11.70
   9   2   1   54.69   11.10
   2 -11   1   29.90   10.90
 -11   9   1   32.90    7.70
   9   2   1   43.90   10.40
   9   2   1   39.80    8.80
   2 -11   1   -0.70   13.40
 -11   9   1   35.50    9.30
   9   2   1   13.60    8.60
 -11   9   1   37.40    9.40
   9   2   1   21.20   15.40
   2 -11   1   47.30    9.30
   2 -11   1   27.80    8.10
   9   2   1   37.70    7.80
   2 -11   1   29.20    7.30
   2 -11   1   52.89   10.50
 -11   9   1   21.40    8.30
 -11   9   1   10.00    8.70
  -9   1  -1  418.86   21.00
  -9   1  -1  427.66   24.10
  -9   1  -1  441.56   30.90
  -9   1  -1  457.35   24.60
   8  -9  -1  431.26   29.60
   8  -9  -1  394.66   24.60
  -9   1  -1  457.05   24.00
   1   8  -1  391.36   26.60
   8  -9  -1  415.36   23.40
   8  -9  -1  414.96   24.20
   1   8  -1  442.66   24.30
   8  -9  -1  426.46   26.00
   1   8  -1  354.16   24.50
   1   8  -1  426.56   21.80
   1   8  -1  401.06   24.90
   1   8  -1  366.26   21.90
  -9   1  -1  424.36   23.70
   8  -9  -1  401.36   24.40
   1   8  -1  409.16   25.30
   8  -9  -1  420.16   24.40
  -8   9   1  410.66   24.30
  -1  -8   1  410.96   24.60
  -1  -8   1  434.96   27.10
   9  -1   1  421.26   23.50
  -8   9   1  423.66   23.90
   9  -1   1  402.66   29.60
  -8   9   1  411.06   24.50
  -1  -8   1  399.86   24.20
  -8   9   1  381.06   23.30
  -8   9   1  413.06   26.40
  -1  -8   1  425.16   22.40
  -8   9   1  442.16   24.10
  -1  -8   1  408.26   26.30
   9  -1   1  446.86   25.80
   9  -1   1  433.56   23.70
   9  -1   1  392.06   24.90
   9  -1   1  411.56   24.80
  -1  -8   1  380.06   26.30
  -1  -8   1  422.26   24.90
   9  -1   1  414.76   23.20
  -1  -8   1  436.86   24.50
  -9   4  -1   31.40   11.50
   4   5  -1   33.60    7.10
   4   5  -1   31.60    6.70
   4   5  -1   28.50   11.20
   4   5  -1   29.20    7.70
  -9   4  -1   30.40    6.80
   5  -9  -1   26.00    6.20
   5  -9  -1   16.60    7.10
  -9   4  -1   24.60    6.50
  -9   4  -1   18.50    5.40
  -9   4  -1   14.90    5.20
   5  -9  -1   30.10    6.70
  -9   4  -1   20.80    6.60
   4   5  -1   22.40    5.90
   5  -9  -1   16.80    8.80
   5  -9  -1   28.30    6.30
   5  -9  -1   27.60    6.10
   5  -9  -1   27.90    6.00
   4   5  -1   34.00    8.50
   5  -9  -1   18.70    5.30
   4   5  -1   22.00    7.00
  -5   9   1   19.20    6.40
  -5   9   1   35.00    5.90
  -5   9   1   28.70    7.50
  -4  -5   1   29.20    6.20
  -5   9   1   33.30    6.50
   9  -4   1   42.60    7.20
   9  -4   1   43.10    7.90
  -4  -5   1   24.50    6.30
   9  -4   1   38.00    6.50
  -4  -5   1   34.90    5.30
  -5   9   1   31.00    6.50
   9  -4   1   23.40    7.50
  -5   9   1   38.80    6.30
  -4  -5   1   25.40    7.30
  -4  -5   1   24.10    6.20
   9  -4   1   24.40    6.60
  -5   9   1   22.70    7.30
  -4  -5   1   28.30    6.30
   7   2  -1 1186.78   64.99
  -9   7  -1 1377.66   59.89
   2  -9  -1 1220.48   62.89
   2  -9  -1 1321.37   60.29
  -9   7  -1 1258.07   58.69
   7   2  -1 1331.87   61.09
   7   2  -1 1197.28   59.09
   7   2  -1 1218.28   59.59
   7   2  -1 1189.68   58.39
   2  -9  -1 1316.07   58.69
  -9   7  -1 1283.47   59.79
   2  -9  -1 1270.37   58.29
   2  -9  -1 1301.47   58.79
  -9   7  -1 1286.87   59.09
   2  -9  -1 1237.58   58.89
  -9   7  -1 1269.97   58.99
  -9   7  -1 1223.28   57.59
   7   2  -1 1229.98   57.49
   7   2  -1 1105.09   58.79
   2  -9  -1 1274.17   57.59
   9  -7   1 1258.57   58.89
  -2   9   1 1315.37   60.99
   9  -7   1 1270.17   59.09
   9  -7   1 1283.47   60.59
   9  -7   1 1299.47   59.99
  -7  -2   1 1270.37   59.69
  -2   9   1 1231.68   58.99
  -7  -2   1 1124.09   56.99
  -2   9   1 1314.47   59.39
   9  -7   1 1236.28   58.79
  -2   9   1 1283.37   57.19
   9  -7   1 1252.67   59.29
  -2   9   1 1219.08   62.79
  -2   9   1 1332.97   58.39
  -2   9   1 1375.86   60.79
  -7  -2   1 1221.98   58.79
  -7  -2   1 1140.49   59.69
  -2   9   1 1287.17   58.79
  10  -1  -1   32.40    6.40
  -1  -9  -1   31.40    8.10
  10  -1  -1   24.40    9.60
  -1  -9  -1   25.30    7.70
  -9  10  -1   24.40    9.20
  10  -1  -1   15.30    8.10
  10  -1  -1   25.50    7.90
  -9  10  -1   13.30    6.80
  -1  -9  -1   21.50    5.10
  -9  10  -1   10.80    6.60
  -1  -9  -1   15.30   12.30
  10  -1  -1   37.70    8.70
  10  -1  -1    9.10    5.00
  -9  10  -1   16.10    7.00
  -9  10  -1   22.30    7.80
  -9  10  -1   12.00    6.40
  -1  -9  -1   19.10    7.30
  -1  -9  -1   35.50    9.90
  -1  -9  -1   11.90    7.20
 -10   1   1   30.20    9.60
 -10   1   1   28.80    9.00
 -10   1   1   28.60   10.40
   9 -10   1   14.00    6.70
   1   9   1   18.70    6.00
   9 -10   1   31.20    8.50
   1   9   1    9.00    7.90
 -10   1   1   15.20    7.80
   9 -10   1   22.00    9.10
   9 -10   1    8.10    6.90
   1   9   1   22.00    7.10
   1   9   1   13.60    8.30
   9 -10   1   32.00    7.30
   9 -10   1   23.20    7.70
   1   9   1   24.90    7.60
 -10   1   1   18.40    7.60
   1   9   1    7.30    7.40
   9 -10   1   19.20    9.50
 -10   1   1   21.80    6.90
  13  -4  -1  946.21   48.40
  -9  13  -1  887.31   51.69
  -9  13  -1  899.91   49.40
  -4  -9  -1  938.31   42.70
  -9  13  -1  969.10   48.70
  -9  13  -1  913.41   46.60
  13  -4  -1  772.52   49.80
  -4  -9  -1  953.40   48.00
  -4  -9  -1 1000.60   48.90
  13  -4  -1  913.41   47.90
  13  -4  -1  925.41   50.49
  -9  13  -1  880.01   49.20
  -9  13  -1  931.91   46.90
  -4  -9  -1  964.30   57.59
  13  -4  -1  940.81   44.90
  -4  -9  -1  953.70   47.70
  13  -4  -1  842.42   47.20
  -4  -9  -1  935.41   49.40
   4   9   1  915.01   48.60
 -13   4   1  972.00   49.00
   9 -13   1  945.91   49.10
   9 -13   1  790.72   49.50
   9 -13   1  886.01   45.90
 -13   4   1  912.11   49.50
 -13   4   1  837.32   46.70
   4   9   1  872.11   57.69
   9 -13   1  931.91   49.40
 -13   4   1  985.00   48.80
   4   9   1  950.70   49.90
   4   9   1  939.51   50.99
   9 -13   1  985.00   49.40
 -13   4   1  795.32   49.50
 -13   4   1  926.01   46.10
   4   9   1  954.40   47.70
 -13   4   1  949.90   55.19
   9 -13   1  956.20   49.30
  -9  16  -1   27.90   13.80
  16  -7  -1   43.70   12.80
  -9  16  -1   25.20   16.40
  16  -7  -1   24.30   14.10
  -7  -9  -1   43.70    6.90
  16  -7  -1   60.49   17.60
  -9  16  -1   44.40   14.00
  16  -7  -1   40.50    9.50
  -7  -9  -1   45.20   14.60
  -7  -9  -1   48.10   15.00
  -9  16  -1   30.90   11.10
  -7  -9  -1   68.69   25.40
  -9  16  -1   23.60   13.80
   7   9   1   36.10   31.20
 -16   7   1   40.10   16.00
 -16   7   1   38.30   24.50
 -16   7   1   44.20   16.50
   9 -16   1   40.80   15.40
   9 -16   1   32.50   14.40
   7   9   1   38.30   14.90
   7   9   1   -6.10   16.10
   7   9   1   34.90   15.30
 -16   7   1   26.10   10.40
   9 -16   1   32.80   17.00
   9 -16   1   26.50   14.40
   7   9   1   39.60   15.80
 -10  -6  -1    8.50    4.40
 -10  -6  -1    4.30   12.80
  16 -10  -1   15.90   14.60
  -6  16  -1   20.30   10.50
 -10  -6  -1  -18.00   22.80
 -10  -6  -1    2.90   12.40
  -6  16  -1    1.50   12.90
  -6  16  -1    8.60   12.90
  16 -10  -1   38.00   13.70
  -6  16  -1    8.40   15.20
  16 -10  -1   42.70   20.00
 -16  10   1   35.00   26.80
  10   6   1   14.00   15.80
   6 -16   1   27.90   12.70
   6 -16   1    5.00   12.20
 -16  10   1    3.90   14.70
  10   6   1    3.30   19.30
  10   6   1    6.50   12.30
   6 -16   1   25.40   13.90
  10   6   1  -13.80   31.10
 -16  10   1   10.00   15.60
 -16  10   1   14.10   14.30
 -16  10   1   13.30    9.70
  10   6   1   20.20   12.20
  10   6   1   41.00   15.60
   6 -16   1  -14.80   29.80
  -3  13  -1  648.74   34.60
 -10  -3  -1  606.84   35.40
  -3  13  -1  623.34   40.50
  13 -10  -1  664.93   43.40
 -10  -3  -1  647.84   36.00
 -10  -3  -1  605.64   35.40
 -10  -3  -1  621.54   37.00
  -3  13  -1  651.93   33.10
  13 -10  -1  573.94   37.20
  13 -10  -1  631.84   36.60
  -3  13  -1  541.15   38.60
 -10  -3  -1  634.34   45.80
  13 -10  -1  636.74   35.80
  -3  13  -1  613.14   36.10
  13 -10  -1  582.84   40.50
  13 -10  -1  542.35   35.80
  -3  13  -1  628.84   37.50
   3 -13   1  620.44   37.30
   3 -13   1  602.84   33.70
  10   3   1  564.64   46.70
   3 -13   1  588.04   44.20
  10   3   1  582.54   34.30
   3 -13   1  663.13   37.80
 -13  10   1  595.84   36.40
 -13  10   1  621.24   36.70
  10   3   1  610.64   41.40
 -13  10   1  594.24   38.00
  10   3   1  648.14   35.30
   3 -13   1  665.93   37.20
   3 -13   1  619.84   37.70
  10   3   1  577.34   37.50
 -13  10   1  619.04   35.70
   0  10  -1    6.80    5.90
   0  10  -1    2.00    4.80
  10 -10  -1  -11.50    7.50
  10 -10  -1   -1.10    6.00
  10 -10  -1    4.00    7.30
  10 -10  -1   -1.70    6.80
   0  10  -1   -9.20    7.00
 -10   0  -1    1.90    5.30
 -10   0  -1  -13.30   11.30
  10 -10  -1   -1.80   11.40
   0  10  -1    6.50    5.90
   0  10  -1   12.20    8.50
 -10   0  -1   -1.30    6.90
  10 -10  -1    7.90    9.30
 -10   0  -1    2.40    4.10
   0  10  -1   -0.80    7.00
 -10   0  -1  -11.60    6.10
   0  10  -1   -4.00    8.80
  10 -10  -1   10.60    8.00
 -10   0  -1    6.40    7.80
  10   0   1    4.20    7.20
  10   0   1    3.00   13.70
   0 -10   1    1.60    6.30
   0 -10   1    1.40   10.00
   0 -10   1    1.10    5.90
   0 -10   1    5.50    7.20
 -10  10   1  -11.00    6.00
 -10  10   1   -4.90    7.10
  10   0   1   -0.10    5.50
   0 -10   1    5.40   10.10
 -10  10   1    0.80    5.10
  10   0   1   -0.60    4.30
 -10  10   1   10.50    8.10
 -10  10   1   -0.20    8.10
  10   0   1   -7.90    7.50
  10   0   1  -10.10    6.10
   0 -10   1    4.90    7.20
   0 -10   1   14.10    5.90
   0 -10   1   -4.60    9.80
  10   0   1   25.00   10.00
 -10  10   1    3.80    7.10
   7 -10  -1  341.17   26.10
   7 -10  -1  316.77   20.40
 -10   3  -1  318.87   28.40
   3   7  -1  298.07   21.50
   7 -10  -1  339.47   21.20
   7 -10  -1  313.57   20.70
   3   7  -1  307.17   20.60
 -10   3  -1  305.57   19.80
   3   7  -1  347.17   20.20
 -10   3  -1  332.07   20.80
   3   7  -1  305.57   20.70
   7 -10  -1  305.67   22.60
   3   7  -1  261.47   21.70
   7 -10  -1  305.87   20.40
 -10   3  -1  335.07   21.00
   3   7  -1  316.27   18.10
   7 -10  -1  312.67   19.20
 -10   3  -1  321.67   19.90
  -3  -7   1  314.27   22.60
  10  -3   1  308.27   19.80
  -3  -7   1  302.27   20.90
  -3  -7   1  331.97   21.00
  -7  10   1  273.67   20.80
  -7  10   1  320.97   20.10
  10  -3   1  293.17   20.50
  10  -3   1  327.57   21.60
  -3  -7   1  317.17   20.20
  -7  10   1  295.07   24.80
  10  -3   1  291.97   18.60
  -7  10   1  310.67   20.50
  -7  10   1  297.27   19.60
  -7  10   1  293.27   19.30
  -3  -7   1  307.87   23.60
  -7  10   1  314.57   22.20
  -3  -7   1  321.97   17.80
  10  -3   1  331.77   19.80
  -3  -7   1  313.47   19.90
  10  -3   1  315.67   21.10
 -10   6  -1  189.88   16.50
   6   4  -1  185.78   14.50
 -10   6  -1  205.48   16.30
   4 -10  -1  201.78   14.90
   4 -10  -1  183.48   15.10
   6   4  -1  203.68   22.20
   6   4  -1  179.28   15.20
 -10   6  -1  198.68   14.60
   4 -10  -1  180.48   17.50
   4 -10  -1  214.38   15.10
   6   4  -1  195.58   17.20
   6   4  -1  186.18   17.60
 -10   6  -1  201.28   14.00
   4 -10  -1  207.28   15.50
   6   4  -1  162.88   16.00
 -10   6  -1  206.98   16.50
 -10   6  -1  171.28   14.70
   4 -10  -1  197.08   14.40
 -10   6  -1  177.58   22.60
   6   4  -1  198.58   14.60
  10  -6   1  183.88   14.70
  -6  -4   1  183.98   12.40
  -6  -4   1  197.98   15.80
  -4  10   1  183.98   15.90
  10  -6   1  194.38   16.60
  -4  10   1  177.78   20.40
  -6  -4   1  191.98   15.40
  -4  10   1  183.68   15.40
  10  -6   1  161.08   14.10
  -4  10   1  190.08   14.80
  -4  10   1  205.98   14.20
  10  -6   1  200.48   14.80
  -4  10   1  189.48   13.90
  -6  -4   1  196.68   15.50
  -4  10   1  203.08   18.10
  -6  -4   1  187.98   14.20
  10  -6   1  197.88   17.70
  -4  10   1  202.08   16.80
  -6  -4   1  199.48   17.30
  10  -6   1  177.78   14.60
 -10   9  -1   34.60    9.30
   9   1  -1   10.80    7.90
   1 -10  -1   27.60   12.20
   9   1  -1   36.60   15.10
 -10   9  -1   32.50    7.80
   1 -10  -1   20.30    7.60
 -10   9  -1   17.90    7.80
   1 -10  -1   15.20    6.90
   9   1  -1   24.30    6.70
   9   1  -1   17.60    7.80
   9   1  -1    4.00    4.70
 -10   9  -1   14.00    6.70
   9   1  -1   28.30    9.00
   1 -10  -1   21.60    9.70
 -10   9  -1   12.50    7.80
   1 -10  -1   24.50    6.00
   9   1  -1   18.10    5.70
   1 -10  -1   18.50    7.80
 -10   9  -1   20.70    6.70
  -1  10   1   25.00    7.70
  10  -9   1   17.40    6.70
  -1  10   1   19.60   11.20
  10  -9   1    8.70    7.10
  -9  -1   1   15.30    8.00
  10  -9   1   18.10    7.10
  -1  10   1   28.30    7.50
  10  -9   1   15.70    9.50
  10  -9   1   19.40    7.10
  -1  10   1   20.70    8.00
  -9  -1   1    2.80    8.10
  10  -9   1   21.80    9.00
  10  -9   1   20.10    9.00
  -1  10   1   15.40    5.30
  -1  10   1   22.20    6.40
  -1  10   1   22.70    7.80
  -9  -1   1    7.60    6.50
  -9  -1   1   17.20    7.80
  -1  10   1    7.60    8.60
  12  -2  -1  194.98   18.60
 -10  12  -1  159.08   18.70
  -2 -10  -1  179.28   17.30
 -10  12  -1  165.78   16.30
  12  -2  -1  145.69   18.30
  -2 -10  -1  169.78   24.40
  -2 -10  -1  186.58   18.10
 -10  12  -1  158.08   19.40
 -10  12  -1  156.98   18.80
  -2 -10  -1  181.28   13.10
  12  -2  -1  196.78   17.70
 -10  12  -1  169.28   16.50
  12  -2  -1  161.18   19.40
  -2 -10  -1  160.58   17.80
  -2 -10  -1  150.28   19.60
  12  -2  -1  193.08   14.60
 -10  12  -1  131.39   17.40
  10 -12   1  170.18   18.40
  10 -12   1  152.98   16.80
   2  10   1  170.28   15.10
 -12   2   1  184.48   17.20
  10 -12   1  133.19   14.60
   2  10   1  141.29   17.80
   2  10   1  139.79   17.00
   2  10   1  136.49   18.00
  10 -12   1  164.98   22.20
   2  10   1  126.79   12.20
 -12   2   1  195.88   18.90
 -12   2   1  191.38   19.00
  10 -12   1  131.59   17.50
 -12   2   1  160.98   20.70
 -12   2   1  166.88   18.30
   2  10   1  170.38   19.70
   2  10   1  158.18   15.90
 -12   2   1  176.68   21.20
  10 -12   1  202.28   19.80
  -5 -10  -1   24.20    7.00
  -5 -10  -1   31.10   23.60
  -5 -10  -1   24.40   15.70
 -10  15  -1   36.10   16.70
 -10  15  -1    8.70   10.30
 -10  15  -1   28.90   13.00
  -5 -10  -1   15.90   12.40
 -10  15  -1   22.40    9.40
  15  -5  -1   24.60   11.00
  15  -5  -1   19.90    8.20
  15  -5  -1   26.90   13.60
  15  -5  -1   -5.80   15.80
  -5 -10  -1    3.70   11.40
   5  10   1    8.70   13.80
  10 -15   1   38.90   15.30
   5  10   1   26.40   16.20
  10 -15   1    7.30   12.60
 -15   5   1   32.90   12.60
 -15   5   1    4.60   12.90
  10 -15   1   18.70   11.70
   5  10   1   26.30   10.70
 -15   5   1   21.20   11.80
   5  10   1  -63.69   23.70
 -15   5   1   50.39   26.50
  10 -15   1    5.10   15.80
   5  10   1   21.80   12.90
 -15   5   1   21.50   20.50
 -10  18  -1    7.00   13.60
  18  -8  -1   -0.90   10.80
  -8 -10  -1  -18.20   29.10
 -10  18  -1  -12.90   21.10
  18  -8  -1    2.20   16.70
  -8 -10  -1    4.80   16.90
 -10  18  -1   30.50   15.70
  -8 -10  -1  -39.70   15.70
  18  -8  -1    6.20   16.50
 -18   8   1    2.90   17.60
  10 -18   1   -9.50   15.10
   8  10   1   10.00   19.60
   8  10   1   -6.70   16.20
  10 -18   1  -19.70   16.80
   8  10   1    1.10   12.30
 -18   8   1   25.70   17.60
  10 -18   1   21.20   16.30
 -18   8   1   45.70   34.40
 -11  -7  -1    9.40   16.90
  18 -11  -1   -1.90   19.00
  -7  18  -1    2.00   13.40
 -11  -7  -1  -10.20   29.00
  -7  18  -1   23.00   22.70
 -11  -7  -1   22.70   20.90
 -11  -7  -1    7.70   17.80
  18 -11  -1   33.40   17.40
  -7  18  -1  -13.20   19.30
 -18  11   1  -57.19   32.30
  11   7   1    0.90   21.40
   7 -18   1   -4.00   14.90
 -18  11   1   -5.10   16.80
   7 -18   1   47.00   18.60
   7 -18   1   -2.00   17.40
  11   7   1  -10.70   13.60
  11   7   1    7.80   15.00
 -18  11   1   33.60   18.50
  -4  15  -1   68.99   17.80
  15 -11  -1   92.69   17.90
  -4  15  -1  106.29   18.40
  15 -11  -1   95.69   17.30
 -11  -4  -1   49.80   20.10
  15 -11  -1   72.29   15.00
  -4  15  -1   78.49   12.90
 -11  -4  -1   70.79   14.10
  15 -11  -1   87.99   25.30
 -11  -4  -1   94.79   16.70
  15 -11  -1   91.99   21.70
 -11  -4  -1   86.49   10.40
  -4  15  -1   65.69   18.70
  -4  15  -1  116.99   17.40
 -11  -4  -1  122.49   27.20
   4 -15   1   93.79   15.40
  11   4   1  100.49   21.90
 -15  11   1   77.49   16.00
   4 -15   1  102.49   26.60
   4 -15   1  149.88   24.00
  11   4   1  108.69   24.90
 -15  11   1   72.99   15.20
   4 -15   1   92.39   16.90
 -15  11   1   61.59   13.30
  11   4   1   64.49   14.60
  11   4   1   49.99   12.20
  11   4   1   67.69   27.60
   4 -15   1  101.39   16.80
 -15  11   1   99.39   18.30
 -11  -1  -1   41.20    6.30
  12 -11  -1   39.10   13.90
  12 -11  -1   23.80   10.70
  12 -11  -1   61.29   12.20
  12 -11  -1   32.70   17.00
 -11  -1  -1   29.50   10.20
 -11  -1  -1   25.20    6.20
  -1  12  -1   55.19   10.90
  -1  12  -1   40.10   10.30
  -1  12  -1   35.00    7.70
  -1  12  -1   48.10   14.20
  -1  12  -1   46.00   12.10
  12 -11  -1   55.79   12.30
 -11  -1  -1   23.90   10.30
 -11  -1  -1   29.20    5.00
 -11  -1  -1   30.30   15.40
  -1  12  -1   17.60   11.80
 -11  -1  -1   42.80   12.00
  12 -11  -1   20.70    9.70
 -12  11   1   59.49   10.90
  11   1   1   49.50   19.90
   1 -12   1   50.29   12.30
   1 -12   1   36.00   14.40
   1 -12   1   26.50   13.70
  11   1   1   38.90   12.00
  11   1   1   38.50    9.60
 -12  11   1   42.50   12.50
  11   1   1   31.10   11.60
 -12  11   1   34.20   10.30
  11   1   1   19.00    8.00
   1 -12   1   38.30   14.20
 -12  11   1   33.60   11.10
  11   1   1    8.30   12.70
   1 -12   1   41.10   11.00
   1 -12   1   31.90    8.40
   1 -12   1   40.70   11.30
   9 -11  -1   27.40    8.00
 -11   2  -1   51.19    9.70
   2   9  -1   29.20    9.80
   2   9  -1   29.70    9.10
   9 -11  -1   28.40   11.70
   9 -11  -1   18.80   13.40
 -11   2  -1   15.50    9.50
   2   9  -1   47.80    9.50
   9 -11  -1   43.40   10.00
   2   9  -1   26.60   10.40
 -11   2  -1   31.90    8.80
 -11   2  -1   35.60   15.00
   9 -11  -1   43.20    9.60
 -11   2  -1   22.00    8.70
   2   9  -1   25.80   10.00
   2   9  -1   31.80    6.70
   9 -11  -1   20.10    8.90
   2   9  -1   22.80    7.00
   9 -11  -1   23.90    8.80
  -2  -9   1   18.70   10.20
  11  -2   1   53.39    9.80
  11  -2   1   -3.30    8.60
  11  -2   1   39.80    9.60
  -9  11   1   31.60    9.00
  11  -2   1   22.70    6.70
  11  -2   1   30.90    9.60
  -9  11   1   39.50   11.20
  -2  -9   1   15.70    8.00
  -9  11   1   14.10    7.90
  -2  -9   1   33.30    9.00
  -2  -9   1   33.50    6.60
  -9  11   1   39.10    8.80
  -2  -9   1   31.60    9.40
  -9  11   1   10.10   13.10
  -9  11   1   44.00    9.20
  11  -2   1   25.80    7.00
  -2  -9   1   41.20   13.20
  -9  11   1   21.10    8.90
  -2  -9   1   40.70    8.80
 -11   5  -1   15.40    7.70
 -11   5  -1    2.00    5.20
   5   6  -1   10.90    6.60
   6 -11  -1   13.00    6.70
   6 -11  -1   10.20    6.30
   6 -11  -1    9.30    6.70
   5   6  -1   12.30    5.80
 -11   5  -1   14.80    6.80
 -11   5  -1    4.30   12.90
   6 -11  -1   10.80   11.70
   5   6  -1   12.90    8.30
   6 -11  -1    4.90    9.10
   6 -11  -1   12.60    7.60
   6 -11  -1   10.10    6.70
 -11   5  -1   11.80    5.50
 -11   5  -1   10.90    7.50
   5   6  -1   12.90    7.20
   5   6  -1    8.30    9.40
   6 -11  -1    6.70    6.40
   5   6  -1    4.50   11.80
   5   6  -1   18.70    8.20
  -5  -6   1   18.60    4.90
  11  -5   1    8.70    5.90
  -5  -6   1    6.50    5.50
  -6  11   1    4.20    7.90
  -6  11   1   -1.00    7.70
  -5  -6   1   23.70    8.20
  -5  -6   1   -5.20    8.20
  11  -5   1   30.40    9.90
  -6  11   1   15.80    7.80
  11  -5   1   13.50    6.30
  -6  11   1   -1.10    5.40
  -6  11   1    4.60    5.30
  -5  -6   1    9.10    6.60
  -6  11   1   14.60    6.80
  11  -5   1    2.70    6.70
  11  -5   1    9.20    7.30
  -6  11   1    3.60   10.30
  -5  -6   1   12.60    6.20
  -6  11   1   12.50    6.60
   3 -11  -1   15.60    7.40
   8   3  -1    5.20   14.00
 -11   8  -1   17.00    8.60
   8   3  -1    3.60    6.30
   8   3  -1    9.70    8.20
   8   3  -1    0.50    7.50
 -11   8  -1   10.20    7.00
 -11   8  -1    5.20    7.60
   3 -11  -1   -6.00    8.70
   8   3  -1   -2.30    5.50
   3 -11  -1    4.00    7.10
   3 -11  -1    2.40    5.80
 -11   8  -1   -3.20    5.90
   8   3  -1    7.60    5.50
   8   3  -1   16.10   10.60
   3 -11  -1   -5.30    9.60
 -11   8  -1    5.80    6.00
   3 -11  -1    9.00    6.70
 -11   8  -1    0.20    7.10
   3 -11  -1   13.90    7.00
  -3  11   1    5.30    8.30
  11  -8   1   13.30    7.20
  -3  11   1   -4.10    6.50
  -8  -3   1    2.40    5.60
  -8  -3   1   -1.00    5.20
  -8  -3   1    7.90    7.30
  -8  -3   1  -11.50    7.00
  11  -8   1    1.60    5.60
  11  -8   1   -0.80    7.10
  -3  11   1    6.50    5.60
  11  -8   1  -11.10    8.90
  -3  11   1   -6.30   10.70
  11  -8   1    2.00    4.70
  11  -8   1    0.60    6.90
  -3  11   1   -2.60    7.50
  -8  -3   1    6.80    4.20
  -8  -3   1   17.50   10.20
  -3  11   1    1.50    5.60
  -3  11   1   -9.00    6.80
  -3  11   1   10.00    5.90
 -11  11  -1    9.90   10.20
   0 -11  -1   -4.10    5.50
   0 -11  -1    4.10    8.10
 -11  11  -1    6.30    8.10
  11   0  -1   -2.30    7.70
  11   0  -1    1.30    6.40
  11   0  -1    5.60    5.50
  11   0  -1  -10.90    8.90
   0 -11  -1   12.50    8.60
   0 -11  -1   -8.50   14.40
 -11  11  -1   -3.50    6.30
   0 -11  -1    4.70    9.00
   0 -11  -1    8.60   10.10
 -11  11  -1   -8.20    7.30
  11   0  -1    7.60    9.70
   0 -11  -1    4.60    8.10
 -11  11  -1    6.50    9.70
 -11  11  -1   -4.40    8.40
  11   0  -1   -2.10   10.10
 -11   0   1   -5.30    8.20
 -11   0   1   16.60   11.00
  11 -11   1   -2.50   10.90
   0  11   1    9.60    8.50
   0  11   1   -0.60    6.90
  11 -11   1   -6.10    8.50
 -11   0   1   -8.60    9.50
   0  11   1   -4.80    5.70
   0  11   1   11.30    6.30
 -11   0   1   -3.10    5.60
 -11   0   1   17.40   12.20
  11 -11   1    2.90    7.80
  11 -11   1    2.10    8.80
   0  11   1    3.10    8.70
  11 -11   1    7.20   11.00
 -11   0   1    3.20    8.50
   0  11   1   -6.60    8.90
  11 -11   1   -1.20    8.90
  11 -11   1    0.20    7.80
   0  11   1    4.60    9.50
 -11  14  -1  -13.60    9.00
 -11  14  -1   -5.60   10.70
  -3 -11  -1   27.20   14.20
 -11  14  -1   14.20   12.90
  14  -3  -1    4.10   11.90
  -3 -11  -1    2.90   19.90
  14  -3  -1    4.80   12.50
  14  -3  -1   22.10    7.80
  14  -3  -1    7.50    9.60
 -11  14  -1   -3.10   13.70
 -11  14  -1  -10.50    8.60
  -3 -11  -1    4.30   10.50
  -3 -11  -1   -2.20    6.60
  -3 -11  -1   -1.20    9.40
 -14   3   1    9.60   16.20
 -14   3   1   11.90   11.20
   3  11   1   -1.60    6.20
 -14   3   1    0.40    8.50
   3  11   1    7.00   11.90
 -14   3   1   11.90    9.90
   3  11   1   11.70   10.80
   3  11   1   -4.30    8.10
  11 -14   1   -3.50   10.00
  11 -14   1   -9.90   11.50
 -14   3   1   -4.90   11.20
   3  11   1  -15.70   13.20
  11 -14   1    5.90   12.00
   3  11   1    6.20    9.00
  11 -14   1    6.80   17.40
   3  11   1   72.79   25.00
 -14   3   1   10.90   10.40
  11 -14   1  -10.10   10.70
  11 -14   1   -0.80    9.90
  17  -6  -1   18.10    9.90
  -6 -11  -1   14.40   26.90
 -11  17  -1   -7.90   11.20
  17  -6  -1   12.60   13.60
  -6 -11  -1   18.60    8.20
 -11  17  -1   -5.00   12.70
  17  -6  -1   16.30   16.50
 -11  17  -1   -3.40   19.00
  -6 -11  -1   26.50   15.40
  -6 -11  -1   13.20   15.20
  11 -17   1   26.60   16.20
 -17   6   1   13.40   14.70
  11 -17   1   18.40   16.90
  11 -17   1   17.90   26.70
   6  11   1    5.10   14.40
  11 -17   1   24.70   16.50
   6  11   1   23.50   12.40
   6  11   1   17.30   12.30
 -17   6   1   22.90   27.60
 -17   6   1    7.20   17.10
   6  11   1   15.60   19.10
  -5  17  -1   -2.90   13.40
 -12  -5  -1  -11.90   14.90
 -12  -5  -1   15.80   14.30
  -5  17  -1  -18.30   18.20
  -5  17  -1    8.70   11.40
 -12  -5  -1  -21.20   28.60
 -12  -5  -1    1.20   15.10
  17 -12  -1   15.20   15.30
  17 -12  -1  -39.30   22.90
  17 -12  -1  -13.50   16.80
   5 -17   1  -24.20   15.00
   5 -17   1  -14.80   14.10
 -17  12   1    8.40   16.10
  12   5   1   44.00   28.10
  12   5   1    0.90   13.10
  12   5   1    3.00   11.50
   5 -17   1  -14.10   15.40
 -17  12   1    4.30   30.40
 -17  12   1   15.10   17.30
  12   5   1   37.10   19.00
 -17  12   1   -3.30   13.60
 -12  -2  -1   23.10   12.30
  -2  14  -1   12.90    8.10
  14 -12  -1    8.60    8.60
  14 -12  -1   29.30   13.80
 -12  -2  -1   29.60    6.50
  14 -12  -1   41.00   19.90
 -12  -2  -1   11.70    8.90
 -12  -2  -1   10.30   14.40
 -12  -2  -1   31.50   11.50
  14 -12  -1   12.70   14.10
 -12  -2  -1   18.10    7.10
 -12  -2  -1   20.10    5.50
  14 -12  -1   37.60   15.40
  -2  14  -1    8.30   12.30
  -2  14  -1   23.40   10.60
  -2  14  -1    3.10   14.30
 -14  12   1    6.60   12.70
  12   2   1   21.00   13.30
   2 -14   1   26.90   17.00
   2 -14   1   13.50   12.20
  12   2   1   13.60   10.20
   2 -14   1  -22.30   15.30
  12   2   1    7.50   23.90
   2 -14   1   19.90   12.30
   2 -14   1   25.10   13.20
   2 -14   1   25.80   10.10
  12   2   1   25.10   10.40
  12   2   1   19.90   11.60
 -14  12   1   23.40   11.20
  11 -12  -1   30.60   11.40
   1  11  -1   56.79   14.10
   1  11  -1   48.30    9.60
  11 -12  -1   55.99   11.80
 -12   1  -1   55.79   11.50
 -12   1  -1   29.80    7.80
   1  11  -1   43.10    8.20
  11 -12  -1   20.80   10.50
 -12   1  -1   45.20    8.00
  11 -12  -1   37.50   15.50
   1  11  -1   37.50    9.20
   1  11  -1   33.70   11.40
   1  11  -1   11.10   11.50
 -12   1  -1   47.00   17.80
  11 -12  -1   28.50   10.10
 -12   1  -1   45.30   10.60
  11 -12  -1   34.50   11.70
  11 -12  -1   48.80   17.50
 -12   1  -1   37.90   12.20
  -1 -11   1   18.70   14.00
  -1 -11   1   35.60   10.30
  -1 -11   1   40.80    8.70
 -11  12   1   52.09   12.40
  12  -1   1   34.30   13.10
  -1 -11   1   28.10   10.30
  -1 -11   1   48.90   16.20
  12  -1   1   44.90   10.70
  12  -1   1   42.00   11.80
  -1 -11   1   45.70   11.10
 -11  12   1   40.30   10.40
  12  -1   1   55.49   10.70
 -11  12   1   40.60   16.50
 -11  12   1   29.10    8.40
 -11  12   1   34.40   12.10
  -1 -11   1   45.00   11.80
  12  -1   1   35.60    9.10
   8 -12  -1   50.29   10.20
   4   8  -1   80.59   14.40
   4   8  -1   29.90   10.60
   8 -12  -1   53.79   10.70
   8 -12  -1   43.40   12.60
   4   8  -1   38.70   10.20
 -12   4  -1   50.89    9.80
   8 -12  -1   44.40    9.90
   8 -12  -1   48.70   10.90
 -12   4  -1   22.50   16.50
 -12   4  -1   51.79    8.20
   4   8  -1   49.10    9.80
   8 -12  -1   62.09   11.00
 -12   4  -1   40.20   10.80
 -12   4  -1   64.09   10.40
 -12   4  -1   60.09   11.70
   8 -12  -1   35.60   14.80
   4   8  -1   71.59   14.60
  -4  -8   1   62.19   11.80
  12  -4   1   56.69    9.40
  -8  12   1   53.59   15.20
  -8  12   1   45.30   11.40
  -8  12   1   32.40   10.70
  -8  12   1   37.20    7.80
  -8  12   1   45.30   11.40
  -8  12   1   53.19   10.00
  -4  -8   1   51.69    8.10
  -4  -8   1   37.20   12.00
  -8  12   1   50.79   10.10
  12  -4   1   38.20   10.10
  -4  -8   1   43.40   14.40
  -4  -8   1   37.40   10.20
  -4  -8   1   43.50    9.00
  -4  -8   1   53.79   10.70
  12  -4   1   41.10   11.50
  12  -4   1   62.69   10.80
 -12   7  -1   34.40    8.00
 -12   7  -1   57.69   17.60
   5 -12  -1   43.00   15.60
   7   5  -1   44.60    9.70
   5 -12  -1   47.00    9.90
   7   5  -1   23.80   10.00
   7   5  -1   34.20    9.60
   7   5  -1   47.20   16.80
   5 -12  -1   23.30    8.80
   7   5  -1   39.30    9.00
   5 -12  -1   36.40    8.70
 -12   7  -1   35.70   10.20
   7   5  -1   59.99   13.20
 -12   7  -1   46.60    8.60
 -12   7  -1   28.90    8.50
   5 -12  -1   41.30    8.80
 -12   7  -1   57.69   10.90
   5 -12  -1   34.60   11.90
   7   5  -1   54.19   12.20
   5 -12  -1   48.30    9.90
   5 -12  -1   40.60    9.50
  12  -7   1   24.90   11.70
  12  -7   1   21.80    8.40
  -5  12   1   54.19    9.30
  -5  12   1   22.40   10.30
  -7  -5   1   24.10    8.60
  12  -7   1   39.10    8.70
  -7  -5   1   42.90    9.30
  -5  12   1   44.90   11.00
  -5  12   1   28.00    8.20
  -7  -5   1   41.60    9.90
  -7  -5   1   36.70   11.00
  -5  12   1   61.19   11.70
  -7  -5   1   37.10    8.10
  -5  12   1   40.50   11.20
  -5  12   1   60.69   15.20
  12  -7   1   27.20    6.80
  -5  12   1   34.60    7.50
  12  -7   1   42.80    9.70
  12  -7   1   41.70   10.50
  -7  -5   1   34.50    6.30
  10   2  -1  146.99   18.80
  10   2  -1  194.08   28.50
 -12  10  -1  169.48   19.10
   2 -12  -1  173.58   21.00
 -12  10  -1  146.59   15.80
   2 -12  -1  218.18   26.00
 -12  10  -1  163.48   16.40
  10   2  -1  189.38   19.10
  10   2  -1  180.08   18.40
  10   2  -1  173.28   16.60
 -12  10  -1  126.69   18.10
   2 -12  -1  168.28   18.80
  10   2  -1  165.18   14.90
   2 -12  -1  193.28   18.60
 -12  10  -1  178.88   19.30
   2 -12  -1  198.38   17.80
   2 -12  -1  178.88   16.20
   2 -12  -1  198.88   17.80
 -12  10  -1  157.08   17.20
  -2  12   1  171.98   14.80
  -2  12   1  171.28   19.50
 -10  -2   1  157.38   13.40
  12 -10   1  162.48   19.60
  -2  12   1  164.28   16.20
  -2  12   1  193.38   24.30
  -2  12   1  182.18   21.20
 -10  -2   1  163.48   21.20
  -2  12   1  181.38   20.50
 -10  -2   1  159.08   17.60
  -2  12   1  169.08   14.60
 -10  -2   1  151.38   18.60
  12 -10   1  155.48   18.90
  12 -10   1  152.98   17.70
  -2  12   1  199.08   18.80
  12 -10   1  156.18   17.20
  12 -10   1  168.58   20.10
 -10  -2   1  168.48   17.30
  -1 -12  -1   27.30   11.00
  13  -1  -1   37.80    8.50
 -12  13  -1   22.00   12.10
  13  -1  -1   30.80    9.90
 -12  13  -1   39.90   13.30
  -1 -12  -1  -17.60   12.20
  13  -1  -1    2.60   12.20
 -12  13  -1   36.50   15.20
 -12  13  -1    7.10    9.60
 -12  13  -1   16.80    8.40
  -1 -12  -1   14.40    9.90
  13  -1  -1   28.40   12.80
  -1 -12  -1   22.40    8.90
  -1 -12  -1   27.80   18.70
  12 -13   1   26.10   12.10
   1  12   1   14.20    8.80
   1  12   1   27.80    9.00
  12 -13   1   25.90   11.00
  12 -13   1   21.30   16.50
 -13   1   1   -9.70   10.80
 -13   1   1   22.50   14.50
   1  12   1   15.60   11.80
 -13   1   1   41.00   12.70
 -13   1   1   34.90   11.60
  12 -13   1   17.30   11.70
   1  12   1   35.90    8.10
   1  12   1   23.40   11.80
  12 -13   1   42.00   14.30
   1  12   1   33.70   13.80
 -13   1   1   25.80   11.90
  16  -4  -1   40.20   11.20
  16  -4  -1   26.00   15.90
  -4 -12  -1   -8.10   24.20
  16  -4  -1   18.20   13.10
  -4 -12  -1   27.70    9.60
 -12  16  -1   29.80   19.10
 -12  16  -1   38.50   14.40
 -12  16  -1   15.20   14.70
  -4 -12  -1   34.70   14.60
  -4 -12  -1   13.20   12.80
  12 -16   1   43.30   16.20
  12 -16   1   56.39   41.50
   4  12   1   61.09   14.00
   4  12   1   42.60   12.30
 -16   4   1   50.89   24.30
 -16   4   1   18.00   15.80
  12 -16   1   39.10   14.90
  12 -16   1   53.39   15.30
   4  12   1   27.20   14.80
   4  12   1   15.10   18.60
 -16   4   1   34.00   12.30
  16 -13  -1  219.48   26.90
  -3  16  -1  171.08   27.10
  -3  16  -1  172.98   20.60
  -3  16  -1  137.39   20.50
 -13  -3  -1  190.88   23.30
  16 -13  -1  180.78   22.40
  -3  16  -1  158.38   25.00
  -3  16  -1  174.78   28.20
 -13  -3  -1  122.69   34.00
 -13  -3  -1  191.18   15.40
 -13  -3  -1  222.58   24.80
  16 -13  -1  208.28   33.00
 -13  -3  -1  164.38   17.90
  13   3   1  229.78   28.00
   3 -16   1  214.48   23.20
   3 -16   1  155.88   22.30
 -16  13   1  182.98   23.80
 -16  13   1   93.69   31.80
  13   3   1  186.18   24.50
  13   3   1  216.28   28.10
 -16  13   1  196.58   23.90
  13   3   1  180.68   35.30
   3 -16   1  247.68   28.60
  13   3   1  177.18   23.40
   3 -16   1  246.28   30.00
 -16  13   1  220.98   27.10
 -13   0  -1   -6.20    6.90
  13 -13  -1   17.40   10.70
  13 -13  -1    6.50   11.00
   0  13  -1  -10.60    9.30
 -13   0  -1   -1.90   11.50
   0  13  -1    1.70    7.90
 -13   0  -1   20.30   18.90
  13 -13  -1   27.20   20.50
  13 -13  -1  -16.80   13.40
 -13   0  -1   -2.00   13.80
  13 -13  -1   33.20   16.00
   0  13  -1   -0.90   13.00
   0  13  -1   -0.80    7.40
   0  13  -1   10.80   19.30
   0 -13   1    0.30   11.50
   0 -13   1   -8.60   12.10
  13   0   1  -14.70   10.70
 -13  13   1   -3.00   12.20
 -13  13   1   -5.10    8.00
  13   0   1   -4.60   12.10
  13   0   1   -8.60    8.30
   0 -13   1  -11.20   10.90
  13   0   1    2.00    9.40
   0 -13   1   27.40   16.20
   0 -13   1   -5.60    7.60
 -13  13   1  -12.10   11.10
  10 -13  -1  670.23   37.90
 -13   3  -1  602.74   47.40
  10 -13  -1  600.04   37.70
   3  10  -1  640.94   38.30
 -13   3  -1  656.93   32.70
  10 -13  -1  648.34   37.00
   3  10  -1  654.03   36.80
  10 -13  -1  570.94   41.10
   3  10  -1  651.33   38.80
 -13   3  -1  682.53   36.40
 -13   3  -1  618.74   36.70
  10 -13  -1  612.74   46.30
   3  10  -1  642.14   41.00
 -13   3  -1  657.33   37.80
  10 -13  -1  570.04   35.20
 -13   3  -1  666.13   37.20
   3  10  -1  615.74   33.10
   3  10  -1  592.74   33.00
  10 -13  -1  561.64   37.00
  -3 -10   1  660.13   37.20
  -3 -10   1  594.74   41.90
 -10  13   1  644.54   38.10
  -3 -10   1  618.84   37.50
 -10  13   1  638.04   40.20
  13  -3   1  627.44   34.50
 -10  13   1  600.24   35.50
  -3 -10   1  626.44   37.50
  13  -3   1  608.04   38.30
  13  -3   1  658.13   36.10
  -3 -10   1  548.65   40.10
 -10  13   1  616.54   36.00
  13  -3   1  615.04   36.50
  -3 -10   1  662.73   38.00
  -3 -10   1  649.54   33.10
 -10  13   1  642.94   43.50
   6   7  -1   13.20    8.60
   7 -13  -1   13.50    8.70
   6   7  -1   29.70   15.20
   7 -13  -1   20.30    8.60
   7 -13  -1   16.00    9.30
 -13   6  -1   38.80   18.00
   7 -13  -1    7.10   14.70
 -13   6  -1   24.10    8.10
   6   7  -1   24.20    9.20
 -13   6  -1   35.70   11.10
   6   7  -1   29.60   10.80
   6   7  -1   42.80   14.10
 -13   6  -1   11.50    9.00
   7 -13  -1   37.80   13.20
 -13   6  -1   24.80   10.40
 -13   6  -1   24.70    6.90
   6   7  -1   39.20   10.40
   7 -13  -1    2.10    9.50
   7 -13  -1   31.00   10.20
   7 -13  -1   21.30    8.40
  -6  -7   1   35.50   10.40
  -6  -7   1   22.80    8.50
  13  -6   1   10.70   12.40
  13  -6   1   12.70    8.10
  -6  -7   1   22.90    9.30
  -6  -7   1   29.40    9.60
  -6  -7   1   28.20    6.90
  13  -6   1   23.80    9.90
  -7  13   1   39.00    9.50
  -6  -7   1   18.30   12.60
  13  -6   1   32.50    9.30
  -7  13   1   34.10   12.00
  -7  13   1   50.19   15.10
  -7  13   1   30.30    8.90
  -7  13   1   23.50    9.20
  -6  -7   1   19.10   13.80
  -7  13   1    2.50   11.30
  -7  13   1   10.90    8.40
  13  -6   1   -1.90    9.40
   9   4  -1  944.91   48.50
   9   4  -1  957.30   47.70
   4 -13  -1  985.50   49.50
   4 -13  -1  927.21   49.20
 -13   9  -1  992.50   48.60
 -13   9  -1  947.21   59.99
 -13   9  -1  875.81   49.20
   4 -13  -1  966.20   51.89
   9   4  -1  957.00   52.39
   4 -13  -1  958.20   47.80
   4 -13  -1  909.11   54.39
 -13   9  -1  867.01   46.70
   4 -13  -1 1038.40   49.20
 -13   9  -1  875.01   49.50
   9   4  -1  932.41   51.69
 -13   9  -1  922.41   49.99
 -13   9  -1  850.11   48.80
   4 -13  -1  908.11   48.20
   9   4  -1  929.11   49.40
   9   4  -1  991.50   60.09
  -4  13   1  914.31   49.90
  -4  13   1  944.11   51.49
  -9  -4   1  911.31   49.50
  -9  -4   1  965.80   49.99
  -9  -4   1  949.51   44.70
  13  -9   1  966.20   49.30
  -9  -4   1  889.61   51.39
  -4  13   1  963.90   47.50
  -9  -4   1  921.61   47.30
  -4  13   1  916.41   51.99
  -4  13   1  934.41   49.90
  13  -9   1  948.51   49.20
  13  -9   1  942.01   50.59
  -4  13   1  870.41   52.79
  -4  13   1  972.10   48.60
  -9  -4   1  898.31   48.90
  13  -9   1  951.00   49.10
  13  -9   1  991.70   49.20
  -4  13   1  931.01   46.80
   1 -13  -1    3.80    9.70
   1 -13  -1    4.60   13.40
 -13  12  -1   18.50   10.70
 -13  12  -1   19.00    8.90
 -13  12  -1    3.70    9.70
   1 -13  -1   30.80    9.30
  12   1  -1   38.30    9.30
   1 -13  -1   58.09   19.00
 -13  12  -1   43.70   13.40
  12   1  -1   11.30   13.30
  12   1  -1   23.00   10.30
  12   1  -1   32.40   24.80
  12   1  -1   20.20   13.10
   1 -13  -1   20.70   10.40
  13 -12   1   11.50   11.70
  13 -12   1   29.80   12.40
  13 -12   1    9.60   14.00
 -12  -1   1   30.20   12.90
 -12  -1   1   21.00   15.40
  -1  13   1   18.90   13.40
  13 -12   1   31.20   10.40
 -12  -1   1   10.80   11.90
  -1  13   1   25.30    9.80
  13 -12   1    4.90   14.70
  -1  13   1   21.30   12.70
  -1  13   1   19.00    8.80
 -12  -1   1   15.00   12.20
  -1  13   1   22.50    9.30
  -1  13   1   27.90   12.10
  15  -2  -1  711.63   47.10
  15  -2  -1  767.02   43.80
 -13  15  -1  543.75   44.60
  -2 -13  -1  726.13   43.40
  15  -2  -1  738.63   38.80
  -2 -13  -1  700.93   41.80
  15  -2  -1  721.93   47.10
  -2 -13  -1  664.43   37.40
 -13  15  -1  593.34   43.90
 -13  15  -1  658.43   41.70
  -2 -13  -1  586.34   56.39
 -13  15  -1  637.64   46.40
   2  13   1  709.53   45.20
   2  13   1  641.94   36.10
   2  13   1  641.64   47.20
  13 -15   1  649.14   44.20
  13 -15   1  657.03   44.00
 -15   2   1  676.53   37.10
  13 -15   1  631.84   46.70
   2  13   1  533.25   50.39
   2  13   1  658.73   41.70
   2  13   1  716.13   45.60
 -15   2   1  766.32   49.90
 -15   2   1  835.22   46.10
 -15   2   1  775.72   43.50
 -15   2   1  698.33   41.20
  13 -15   1  701.43   53.49
  -5 -13  -1   23.10   18.30
  -5 -13  -1    6.10   34.00
  18  -5  -1   -4.40   16.70
 -13  18  -1    6.10   15.50
 -13  18  -1  -13.40   20.00
 -13  18  -1    2.50   17.50
  18  -5  -1   -3.10   20.60
  18  -5  -1    3.30   13.10
  13 -18   1   14.90   31.30
   5  13   1  -16.50   12.30
 -18   5   1    5.50   18.70
   5  13   1   27.10   15.80
   5  13   1   39.40   22.10
   5  13   1   12.90   18.20
 -18   5   1   -7.00   30.90
  13 -18   1   -2.30   18.80
  13 -18   1  -13.70   20.50
 -18   5   1    8.30   16.20
 -14  -1  -1  171.38   28.70
  -1  15  -1  151.08   19.50
  -1  15  -1  178.18   27.10
 -14  -1  -1  172.08   27.60
  15 -14  -1  168.38   32.20
  -1  15  -1  186.48   26.60
  -1  15  -1  118.69   17.60
 -14  -1  -1  172.18   34.30
 -14  -1  -1  191.98   14.30
  15 -14  -1  169.38   23.60
  15 -14  -1  181.48   22.90
 -14  -1  -1  219.88   26.90
  -1  15  -1  133.99   24.00
 -15  14   1  164.38   22.30
 -15  14   1  180.68   24.80
  14   1   1  166.68   19.80
   1 -15   1  163.58   27.90
 -15  14   1  197.18   25.10
  14   1   1  149.29   19.90
   1 -15   1  187.38   25.70
  14   1   1  203.28   27.00
  14   1   1  205.68   38.10
   1 -15   1  196.98   22.00
   1 -15   1  219.68   26.40
 -14   2  -1   14.80   21.40
   2  12  -1    4.00   12.90
  12 -14  -1   25.50   12.70
   2  12  -1   11.70   21.20
   2  12  -1   18.80   10.70
  12 -14  -1   -0.10   13.30
 -14   2  -1   13.60   12.50
  12 -14  -1   18.20   12.40
   2  12  -1   23.10    8.20
   2  12  -1   17.80    9.50
 -14   2  -1   20.30   10.20
 -14   2  -1   29.40    8.70
  12 -14  -1   47.90   22.20
  -2 -12   1   21.00   12.60
 -12  14   1   35.20   11.70
  14  -2   1   -3.90   11.80
 -12  14   1   16.80   11.80
 -12  14   1   11.50   11.80
  -2 -12   1   25.40   13.10
  14  -2   1   -0.30    8.20
 -12  14   1    7.60   20.70
  14  -2   1   16.10    9.20
  -2 -12   1   33.30   18.70
  -2 -12   1   25.70    8.60
  14  -2   1   25.80   14.70
  -2 -12   1   22.60   10.50
   9 -14  -1   44.70   11.80
   9 -14  -1   25.20   13.00
 -14   5  -1   65.29   22.20
   5   9  -1   51.69   13.00
   9 -14  -1   43.60   12.50
   9 -14  -1   26.60   20.30
 -14   5  -1   52.89   12.30
   5   9  -1   31.50    9.50
 -14   5  -1   41.60    9.40
   9 -14  -1   38.00   13.00
 -14   5  -1   24.10    8.30
   9 -14  -1   36.40   16.30
   5   9  -1   51.59   17.00
   5   9  -1   62.59   13.70
 -14   5  -1   77.09   14.00
 -14   5  -1   43.80   13.20
   5   9  -1   43.40   14.30
  -5  -9   1   45.70   18.50
  14  -5   1   28.60   11.20
  14  -5   1   39.90   10.10
  -5  -9   1   48.30    8.60
  -9  14   1   28.30    9.10
  -9  14   1   44.90   11.10
  -9  14   1   81.79   19.10
  -9  14   1   13.10   12.70
  -9  14   1   37.90   10.30
  14  -5   1   46.30   11.20
  14  -5   1   38.30   13.70
  -5  -9   1   43.10   11.90
  -5  -9   1   32.10   11.40
  -5  -9   1   65.89   14.30
   8   6  -1    6.20   10.50
   6 -14  -1   16.70   11.00
   8   6  -1    0.00    8.70
 -14   8  -1   21.50   11.40
   6 -14  -1    1.60    8.80
   6 -14  -1   -2.20   11.00
   8   6  -1  -11.50   10.90
   8   6  -1    1.90   17.90
   6 -14  -1   -4.20   15.80
   8   6  -1    7.00    8.30
 -14   8  -1   10.40   11.20
   6 -14  -1   -5.60    8.40
 -14   8  -1   15.90    7.10
 -14   8  -1   -0.50   18.50
 -14   8  -1   14.20    9.80
 -14   8  -1   12.80   11.50
   6 -14  -1   -8.60    8.00
   6 -14  -1   -6.00   14.70
   8   6  -1    7.90   15.90
   6 -14  -1    8.90    9.60
  -6  14   1  -20.10    9.40
  -6  14   1   -8.20   12.00
  -6  14   1    8.80    7.90
  -8  -6   1   25.00   11.00
  -8  -6   1   10.80   11.00
  14  -8   1   10.30    7.40
  -8  -6   1   12.70    9.50
  -6  14   1    3.00   16.20
  14  -8   1   19.60    9.20
  -6  14   1    3.30   12.60
  -6  14   1   -1.10    9.10
  -8  -6   1   15.20    9.70
  14  -8   1    6.20   10.10
  14  -8   1   16.70    9.50
  -8  -6   1   12.60    6.10
  -6  14   1   -6.20    7.50
  11   3  -1  -16.40   11.80
 -14  11  -1  -10.80   11.90
   3 -14  -1    2.10    8.80
   3 -14  -1   -1.80   15.50
  11   3  -1   15.10    8.60
   3 -14  -1  -19.10   15.90
  11   3  -1    3.70    8.90
  11   3  -1   20.70   22.80
 -14  11  -1   16.70   12.00
   3 -14  -1   -4.20   10.40
   3 -14  -1   -2.30    9.40
 -14  11  -1   -5.50    8.60
 -14  11  -1   -5.90    9.20
 -14  11  -1  -11.10   20.70
  11   3  -1   -7.00   11.70
  -3  14   1   10.00   14.10
 -11  -3   1   14.00   12.40
 -11  -3   1    6.20    9.90
 -11  -3   1    5.70   10.30
  14 -11   1  -10.00   12.90
  -3  14   1   -2.10   12.60
  14 -11   1   -9.00    8.60
  -3  14   1   -7.80    9.80
  -3  14   1    5.30    9.20
  -3  14   1   -4.00    8.00
  14 -11   1   -6.00   11.10
  -3  14   1  -22.50   17.70
  14 -11   1   10.60   14.70
  -3  14   1   -5.60    8.20
 -11  -3   1   -1.80    6.40
  14   0  -1  -41.40   30.30
 -14  14  -1    5.60   14.50
  14   0  -1   16.00   10.10
   0 -14  -1   22.20   24.60
   0 -14  -1   13.00   13.10
 -14  14  -1   18.30   13.50
   0 -14  -1    2.20   12.20
  14   0  -1   10.00   14.90
  14   0  -1  -23.30   13.60
 -14  14  -1   -8.80   19.80
 -14  14  -1   10.50   11.70
   0 -14  -1   -2.10    9.60
  14   0  -1    1.60   10.10
 -14   0   1    7.80   15.00
 -14   0   1   14.00   16.20
  14 -14   1    8.70   13.30
  14 -14   1    8.70   12.60
   0  14   1  -18.90   11.20
   0  14   1    2.00   15.00
  14 -14   1   18.00   20.00
   0  14   1   24.30   16.30
   0  14   1    4.50   10.50
   0  14   1   -3.50   14.90
  14 -14   1    9.60   13.90
 -14   0   1   12.10   14.10
  17  -3  -1   22.40   16.80
  17  -3  -1    0.60   18.90
  -3 -14  -1    7.40   15.80
  -3 -14  -1    8.10   18.20
 -14  17  -1    0.60   20.90
  -3 -14  -1   23.40   13.00
  -3 -14  -1   33.90   32.80
  17  -3  -1   -0.90   11.70
 -14  17  -1   10.80   14.70
 -14  17  -1  -20.00   15.60
   3  14   1   23.10   13.80
  14 -17   1    1.70   29.00
   3  14   1   -7.20   17.30
 -17   3   1    2.50   17.10
  14 -17   1   14.80   31.50
 -17   3   1   27.00   26.30
   3  14   1  -10.50   12.90
 -17   3   1  -29.90   16.20
  14 -17   1   15.70   18.40
   3  14   1  -22.60   19.10
  -2  17  -1  127.99   22.90
  17 -15  -1   97.89   22.90
 -15  -2  -1   60.99   19.90
 -15  -2  -1  113.99   36.90
  -2  17  -1   55.79   15.50
  17 -15  -1   90.49   35.40
  -2  17  -1   88.19   26.30
  -2  17  -1   97.69   25.00
  17 -15  -1   78.19   22.50
   2 -17   1   64.19   18.40
  15   2   1  140.99   44.00
  15   2   1  130.39   25.90
   2 -17   1  113.59   22.70
 -17  15   1   66.39   16.70
  15   2   1   84.09   18.50
 -17  15   1   74.59   22.30
   2 -17   1   84.49   22.40
  15   2   1   87.69   18.10
   2 -17   1   55.89   27.90
 -17  15   1  108.19   23.70
 -15   1  -1  186.88   18.50
 -15   1  -1  229.48   24.50
 -15   1  -1  128.79   31.20
   1  14  -1  142.79   20.50
   1  14  -1  147.29   18.80
  14 -15  -1  241.88   27.60
  14 -15  -1  201.68   24.90
   1  14  -1  222.08   27.50
   1  14  -1  181.88   26.40
  14 -15  -1  170.78   33.70
   1  14  -1  183.88   26.70
  -1 -14   1  175.88   20.80
  15  -1   1  165.48   25.20
 -14  15   1  135.59   20.80
  -1 -14   1  174.58   29.70
  15  -1   1  188.48   28.70
 -14  15   1  142.39   24.90
 -14  15   1  163.58   23.10
 -14  15   1  209.88   27.30
  15  -1   1  171.08   23.60
  -1 -14   1  156.28   21.90
 -14  15   1  176.68   33.90
  -1 -14   1  193.78   24.30
  15  -1   1  191.68   21.40
 -15   4  -1   49.50   24.20
  11 -15  -1   57.49   24.50
   4  11  -1   76.19   17.50
   4  11  -1   61.19   18.60
 -15   4  -1   92.29   17.10
  11 -15  -1  104.49   17.30
  11 -15  -1   89.59   16.20
   4  11  -1   80.49   23.70
 -15   4  -1   85.69   12.20
 -15   4  -1   64.19   12.90
   4  11  -1   76.79   11.30
   4  11  -1   96.29   15.70
  -4 -11   1   65.49   22.80
  -4 -11   1  105.89   18.40
 -11  15   1   87.69   15.30
  -4 -11   1   75.59   11.10
 -11  15   1  100.59   19.10
 -11  15   1   63.29   17.50
 -11  15   1   36.40   22.90
  15  -4   1   79.99   18.10
  -4 -11   1  110.39   29.40
  15  -4   1   92.09   15.60
  15  -4   1   78.59   13.60
  15  -4   1   68.19   14.20
 -15   7  -1  590.44   53.09
   7   8  -1  524.95   43.40
 -15   7  -1  532.45   33.20
   7   8  -1  544.15   42.80
   7   8  -1  582.34   37.80
   8 -15  -1  591.24   46.90
 -15   7  -1  652.93   36.80
 -15   7  -1  616.64   37.90
   8 -15  -1  578.54   37.30
   7   8  -1  553.24   35.70
   7   8  -1  560.34   35.50
   8 -15  -1  525.05   36.20
  15  -7   1  569.54   36.60
  -8  15   1  614.84   39.10
  -7  -8   1  570.54   46.40
  -7  -8   1  616.94   31.40
  -7  -8   1  535.15   36.70
  -8  15   1  534.85   35.10
  -7  -8   1  551.14   37.30
  -7  -8   1  569.54   38.30
  15  -7   1  610.24   36.20
  -8  15   1  562.94   35.90
  15  -7   1  547.25   40.30
  -8  15   1  596.34   43.20
   5 -15  -1   14.50   11.90
 -15  10  -1   28.60   23.00
  10   5  -1   18.70   12.40
 -15  10  -1    8.70   13.20
   5 -15  -1   31.20   11.50
   5 -15  -1   31.50   12.20
  10   5  -1   35.10   15.80
  10   5  -1   18.80   10.50
  10   5  -1   32.30   23.20
   5 -15  -1   18.30   22.30
 -15  10  -1   31.80   11.70
  10   5  -1   16.10   19.00
  10   5  -1   25.10   10.80
  15 -10   1   27.00   13.60
  -5  15   1   21.30   10.30
 -10  -5   1   14.20   14.70
  -5  15   1   23.40   10.20
  -5  15   1   25.90   12.50
  15 -10   1    4.80   12.30
 -10  -5   1    7.20   20.80
 -10  -5   1   10.70   10.90
  -5  15   1   42.00   15.60
 -10  -5   1   24.00    7.80
  -5  15   1   22.00   20.40
  15 -10   1   -4.60    9.40
  15 -10   1   12.60   14.30
 -15  13  -1  723.03   44.70
   2 -15  -1  691.33   41.10
  13   2  -1  639.44   37.80
 -15  13  -1  670.13   40.90
   2 -15  -1  698.03   42.10
  13   2  -1  604.24   43.70
 -15  13  -1  678.63   42.10
  13   2  -1  644.44   40.20
  13   2  -1  694.53   63.49
  13   2  -1  598.84   45.50
   2 -15  -1  608.84   51.29
   2 -15  -1  696.63   39.20
  15 -13   1  600.94   43.20
  -2  15   1  627.94   42.90
 -13  -2   1  614.64   42.20
  -2  15   1  581.34   37.40
 -13  -2   1  659.93   42.30
  -2  15   1  495.15   40.20
 -13  -2   1  557.44   45.50
  15 -13   1  684.43   41.40
  15 -13   1  656.13   47.90
 -13  -2   1  667.23   35.20
  -2  15   1  606.24   45.40
  15 -13   1  639.24   44.10
  -2  15   1  603.64   43.50
  -2  15   1  654.03   44.50
  -1 -15  -1   -8.90   15.50
 -15  16  -1   31.40   16.90
  -1 -15  -1    8.50   18.10
  -1 -15  -1   -1.10   13.00
 -15  16  -1    0.90   19.10
 -15  16  -1   14.60   14.20
  16  -1  -1   14.50   21.00
  16  -1  -1    1.60   19.50
  -1 -15  -1   24.90   33.20
  16  -1  -1   17.20   42.10
   1  15   1  -12.10   12.30
 -16   1   1   -2.70   21.10
   1  15   1  -22.50   12.80
   1  15   1   -3.00   18.70
   1  15   1    5.10   19.70
 -16   1   1   -1.30   17.00
  15 -16   1   50.59   28.80
  15 -16   1    1.80   16.90
   0  16  -1  -27.00   20.30
 -16   0  -1    1.90   17.50
 -16   0  -1   48.20   20.20
 -16   0  -1   36.30   33.20
   0  16  -1   -2.10   15.80
 -16   0  -1   16.80   30.80
   0  16  -1    1.70   19.50
   0  16  -1    5.50   13.00
  16 -16  -1   -0.10   18.00
  16 -16  -1   34.60   34.80
  16 -16  -1   -7.90   17.40
   0 -16   1    0.00   14.20
 -16  16   1    6.50   20.60
   0 -16   1   11.30   28.80
 -16  16   1   16.80   16.90
 -16  16   1   13.50   15.60
   0 -16   1   22.20   19.10
  16   0   1   15.30   13.60
   0 -16   1    7.90   17.70
  16   0   1   23.90   19.60
  16   0   1    3.10   14.60
 -16   3  -1  144.59   34.00
   3  13  -1  232.78   26.70
   3  13  -1  261.07   22.20
 -16   3  -1  176.98   21.40
  13 -16  -1  194.38   36.70
   3  13  -1  249.08   31.90
  13 -16  -1  188.68   24.50
 -16   3  -1  225.78   26.80
 -16   3  -1  228.28   26.80
   3  13  -1  183.18   35.60
   3  13  -1  246.88   31.20
  13 -16  -1  194.28   25.60
 -13  16   1  199.58   23.70
  16  -3   1  206.48   27.30
  -3 -13   1  251.07   22.10
  -3 -13   1  194.88   24.50
 -13  16   1  121.59   33.70
 -13  16   1  184.48   26.70
  16  -3   1  182.38   25.60
 -13  16   1  257.77   31.50
  -3 -13   1  265.07   31.20
  16  -3   1  222.58   23.60
  -3 -13   1  191.98   33.90
 -16   6  -1    9.90   10.50
 -16   6  -1   19.50   12.20
   6  10  -1    2.90   12.80
 -16   6  -1   18.50   25.50
  10 -16  -1   42.20   25.00
   6  10  -1  -10.50   23.50
   6  10  -1  -16.90   14.00
 -16   6  -1    0.00   19.60
  10 -16  -1    3.20   13.20
   6  10  -1   11.20   11.40
   6  10  -1   26.80   15.80
  10 -16  -1   23.50   13.60
  16  -6   1   36.40   13.60
  -6 -10   1    5.10   13.30
  -6 -10   1   31.90    9.00
  16  -6   1   22.70   13.70
  16  -6   1   -6.00   14.00
 -10  16   1   25.70   18.20
  -6 -10   1   11.20   20.90
 -10  16   1    2.00   12.10
 -10  16   1   25.40   11.50
 -10  16   1    8.40   16.10
  -6 -10   1   47.30   15.00
 -10  16   1   18.20   23.00
  16  -6   1   29.60   10.20
   9   7  -1   56.09   25.20
 -16   9  -1   36.70   16.50
 -16   9  -1  -22.80   39.70
   9   7  -1   29.90   13.00
   7 -16  -1   36.50   13.40
   9   7  -1   30.70   14.20
   7 -16  -1   38.90   20.10
   9   7  -1   31.50   17.80
   9   7  -1   -5.90   21.20
   7 -16  -1   63.29   16.90
   7 -16  -1   66.09   26.10
 -16   9  -1   41.40   13.00
  -7  16   1   29.80   14.30
  -9  -7   1   21.90   13.70
  -9  -7   1   53.89    9.20
  -7  16   1   73.89   17.90
  -9  -7   1   35.80   22.90
  16  -9   1   14.90   14.80
  -7  16   1   52.09   18.70
  16  -9   1   29.20   11.20
  -7  16   1   57.79   23.30
  -9  -7   1   26.30   11.90
  -7  16   1   40.60   12.20
  16  -9   1   39.70   14.10
   4 -16  -1   23.60   14.50
   4 -16  -1   35.30   16.90
  12   4  -1    2.00   16.70
 -16  12  -1   -6.70   28.30
 -16  12  -1   34.10   15.70
  12   4  -1   22.80   14.80
  12   4  -1   18.50   30.90
  12   4  -1   32.70   14.20
  12   4  -1   38.30   18.00
   4 -16  -1   23.70   14.10
   4 -16  -1   13.50   25.70
 -16  12  -1   34.40   14.30
 -16  12  -1   37.90   16.10
  16 -12   1   34.70   14.30
  -4  16   1   35.20   11.90
  16 -12   1   17.70   15.40
  16 -12   1   24.90   14.80
 -12  -4   1   36.60   14.50
  -4  16   1   39.40   19.00
  -4  16   1   17.70   17.90
 -12  -4   1   29.60    9.40
  -4  16   1   28.50   12.10
 -12  -4   1   38.70   15.40
  16 -12   1   23.60   18.30
  -4  16   1   40.50   16.20
  15   1  -1  -19.00   18.70
  15   1  -1  -27.30   12.40
   1 -16  -1  -10.40   14.20
  15   1  -1    0.90   14.90
 -16  15  -1    2.50   16.00
   1 -16  -1  -21.00   17.30
   1 -16  -1    3.40   15.70
 -16  15  -1   21.20   20.20
 -16  15  -1  -12.30   14.70
 -15  -1   1  -10.60   15.80
  16 -15   1   20.90   26.30
  16 -15   1   -5.20   16.90
  16 -15   1   16.90   16.60
 -15  -1   1  -13.90   14.30
  -1  16   1   -0.20   12.70
 -15  -1   1    8.90   10.30
  -1  16   1    5.30   19.20
  -1  16   1   23.50   18.90
  -1  16   1   -1.00   12.30
   2  15  -1   73.99   25.70
 -17   2  -1   83.99   22.20
   2  15  -1   68.39   15.40
  15 -17  -1   54.09   20.90
 -17   2  -1   49.99   34.20
   2  15  -1   57.69   18.80
   2  15  -1   77.69   24.80
  15 -17  -1   79.99   39.00
  15 -17  -1   94.69   19.50
  17  -2   1   94.49   18.80
 -15  17   1   74.39   24.80
  -2 -15   1   94.59   21.20
 -15  17   1  109.99   21.80
  -2 -15   1   65.49   25.50
  17  -2   1   94.59   25.10
  -2 -15   1   86.89   23.00
  17  -2   1   62.69   17.70
 -15  17   1   64.19   17.20
   5  12  -1    2.50   11.80
   5  12  -1  -10.70   17.00
   5  12  -1  -27.20   17.20
  12 -17  -1  -41.20   14.40
 -17   5  -1   13.50   15.40
  12 -17  -1   23.80   28.40
 -17   5  -1    3.20   16.20
   5  12  -1  -43.90   31.30
   5  12  -1    1.90   15.00
  12 -17  -1   14.70   16.10
 -17   5  -1  -23.80   13.50
   5  12  -1   22.50   26.10
  17  -5   1   23.00   14.20
 -12  17   1   44.00   29.50
  17  -5   1   -0.70   11.70
  17  -5   1   -8.50   17.80
 -12  17   1   -4.40   11.20
  -5 -12   1   -1.40   16.50
 -12  17   1    4.00   14.70
  -5 -12   1    7.90   14.30
  -5 -12   1  -14.40   26.40
 -12  17   1    7.60   26.50
 -12  17   1  -41.50   17.50
  -5 -12   1   -1.10   10.00
   9 -17  -1   18.10   26.00
 -17   8  -1   56.39   31.60
   9 -17  -1   -2.60   13.70
 -17   8  -1   33.70   16.40
 -17   8  -1   29.30   15.30
   8   9  -1   31.30   14.80
   8   9  -1   43.50   21.60
   8   9  -1   14.70   27.30
   8   9  -1   -4.00   18.40
   9 -17  -1   24.50   15.70
   8   9  -1   31.40   17.00
   8   9  -1   30.40   13.30
  17  -8   1   -8.50   15.20
  -8  -9   1   21.00   15.70
  -9  17   1   -4.50   11.90
  17  -8   1   14.30   16.00
  -8  -9   1   -3.80   14.70
  -8  -9   1   -1.30    9.00
  -8  -9   1   52.99   27.30
  -9  17   1    4.00   24.20
  -9  17   1   20.70   26.00
  17  -8   1   32.70   14.40
  -9  17   1   24.90   12.70
   6 -17  -1  -26.60   27.60
  11   6  -1   -0.10   13.30
   6 -17  -1   14.00   16.50
 -17  11  -1    1.80   16.40
 -17  11  -1   -2.00   11.40
  11   6  -1    2.60   19.40
  11   6  -1    0.80   31.30
   6 -17  -1   18.50   15.30
 -17  11  -1   14.40   30.90
   6 -17  -1   -2.10   13.70
  11   6  -1   -9.30   16.50
  11   6  -1    6.70   16.30
  -6  17   1   32.30   18.30
  17 -11   1   16.40   15.60
  -6  17   1   -6.00   12.50
  17 -11   1  -17.40   14.70
 -11  -6   1   -4.80   25.50
  -6  17   1   14.90   18.70
  17 -11   1   20.90   14.60
  -6  17   1   -6.70   18.50
 -11  -6   1   -7.60   15.70
 -11  -6   1   16.10    8.90
  -6  17   1    1.30   11.60
  17 -11   1   -6.40   16.00
  -6  17   1   42.00   28.10
 -11  -6   1   13.60   15.90
  14   3  -1   16.90   14.50
   3 -17  -1    7.60   27.90
   3 -17  -1   -8.90   19.10
   3 -17  -1   -9.70   14.90
 -17  14  -1   28.10   20.20
 -17  14  -1   30.30   18.80
 -17  14  -1  -22.70   33.70
  14   3  -1   23.80   20.30
   3 -17  -1    0.60   20.90
 -17  14  -1    0.90   15.10
   3 -17  -1  -57.99   30.50
  14   3  -1   -6.50   16.00
  14   3  -1   38.60   41.80
  17 -14   1  -11.90   24.80
  17 -14   1   13.00   17.40
  -3  17   1   -7.10   19.60
  -3  17   1   20.30   22.00
 -14  -3   1   -7.90   10.00
  17 -14   1  -29.40   15.00
 -14  -3   1   10.30   16.20
  -3  17   1    7.40   13.30
 -14  -3   1  -10.00   16.90
  -3  17   1   -0.20   13.40
  11 -18  -1   24.90   19.70
   7  11  -1   -7.10   16.60
   7  11  -1   18.30   19.50
 -18   7  -1    9.20   16.30
 -18   7  -1  -11.20   34.70
  11 -18  -1   11.10   17.30
   7  11  -1   31.50   15.00
  11 -18  -1   11.80   29.80
 -18   7  -1   57.09   19.90
 -11  18   1   -7.30   14.20
  18  -7   1    7.30   12.80
  -7 -11   1   12.00   10.80
  -7 -11   1  -13.30   28.40
  18  -7   1   13.60   18.30
  -7 -11   1   10.30   18.00
 -11  18   1   14.70   20.30
  18  -7   1   20.60   16.10
  -7 -11   1    0.40   15.00
 -11  18   1   30.70   14.60
   8 -18  -1  -41.20   27.30
 -18  10  -1  -52.79   33.20
  10   8  -1   -4.00   17.70
   8 -18  -1    5.90   14.70
 -18  10  -1   16.90   19.00
 -18  10  -1  -19.40   15.70
   8 -18  -1  -12.40   17.70
  10   8  -1  -14.80   14.10
  10   8  -1  -22.50   29.40
  10   8  -1   15.30   16.90
  -8  18   1    6.40   14.90
  -8  18   1   12.40   20.90
 -10  -8   1    8.40   17.60
 -10  -8   1   19.60   29.10
 -10  -8   1   19.00   17.00
  18 -10   1    7.30   15.20
 -10  -8   1  -12.10    9.70
  18 -10   1   20.40   18.30
  -8  18   1   10.60   14.90
   5 -18  -1   25.80   18.90
 -18  13  -1    1.80   17.40
 -18  13  -1   26.30   19.10
 -18  13  -1  -23.20   39.40
  13   5  -1  -22.80   40.50
   5 -18  -1   -8.60   16.80
  13   5  -1    5.20   22.90
   5 -18  -1   -6.00   17.80
  13   5  -1    9.90   15.40
   5 -18  -1  -88.39   31.70
  13   5  -1    9.10   14.90
  -5  18   1   11.40   22.10
 -13  -5   1   15.20   19.20
  -5  18   1   -7.20   14.20
  -5  18   1   -3.60   21.20
  -5  18   1   10.90   14.80
  18 -13   1    7.70   19.50
 -13  -5   1  -35.20   29.90
  18 -13   1   19.30   17.00
 -13  -5   1   11.80   11.20
 -13  -5   1    4.30   18.60
  -1   1  -2  754.42   31.90
   1   0  -2  678.73   32.30
   0  -1  -2  715.13   34.10
   1   0  -2  734.13   30.90
  -1   1  -2  749.73   30.80
   1   0  -2  682.53   37.90
  -1   1  -2  701.03   30.70
  -1   1  -2  713.63   34.60
   0  -1  -2  727.43   35.10
   0  -1  -2  732.83   34.90
  -1   1  -2  687.33   33.00
   1   0  -2  714.93   31.00
   0  -1  -2  711.83   36.90
   1   0  -2  686.63   30.90
   1  -1   2  737.03   38.40
   1  -1   2  693.63   30.80
   1  -1   2  664.13   34.10
   0   1   2  681.93   34.70
   0   1   2  717.73   31.50
   0   1   2  741.93   31.40
   1  -1   2  712.63   33.30
  -1   0   2  698.03   31.20
  -1   0   2  712.33   37.70
  -1   0   2  685.13   31.00
  -1   0   2  709.03   31.00
   0   1   2  703.03   34.70
   1  -1   2  706.33   30.90
  -1   0   2  684.43   31.00
   1  -1   2  743.13   30.60
   1  -1   2  715.83   30.70
   0   1   2  729.03   34.60
  -1   0   2  665.63   32.60
  -1   0   2  718.23   30.90
  -1   0   2  735.93   35.70
   1  -1   2  744.43   31.80
   0   1   2  764.82   37.30
  -2   0  -2   27.70    2.60
   0   2  -2   25.20    3.40
   2  -2  -2   25.60    2.80
  -2   0  -2   26.10    2.30
  -2   0  -2   19.80    7.10
  -2   0  -2   25.70    5.00
   2  -2  -2   27.90    2.70
   0   2  -2   24.70    3.60
   2  -2  -2   27.80    2.40
   0   2  -2   20.80    4.10
   0   2  -2   27.90    8.70
   2  -2  -2   25.10    1.90
  -2   0  -2   27.40    2.10
   0   2  -2   24.70    3.00
  -2   0  -2   21.50    5.00
   0   2  -2   25.40    3.30
   2  -2  -2   30.70    3.40
   2  -2  -2   20.50    2.40
   2  -2  -2   26.10    7.70
   2   0   2   26.30    2.10
   2   0   2   25.50    2.10
   2   0   2   26.30    2.30
  -2   2   2   29.30    3.10
  -2   2   2   27.50    6.00
   0  -2   2   24.90    3.30
   2   0   2   28.30    2.60
  -2   2   2   23.50    2.70
   0  -2   2   22.90    8.30
   2   0   2   25.60    5.10
   2   0   2   34.40    5.20
   2   0   2   25.60    2.40
   0  -2   2   21.70    3.80
  -2   2   2   27.70    3.30
   0  -2   2   24.40    3.20
   0  -2   2   22.50    3.30
  -2   2   2   30.20    7.50
  -2   2   2   25.50    3.20
  -2   2   2   29.20    2.10
   2   0   2   24.90    6.40
  -1  -2  -2    9.50    1.70
  -2   3  -2    9.40    2.30
  -2   3  -2    7.30    2.50
  -1  -2  -2    3.90    5.00
   3  -1  -2    5.60    2.30
   3  -1  -2    4.70    1.90
  -2   3  -2    8.80    5.00
  -2   3  -2    4.70    2.00
   3  -1  -2    9.10    2.30
  -2   3  -2    7.20    2.30
   3  -1  -2   11.80    6.40
  -1  -2  -2    7.80    2.20
  -1  -2  -2    3.80    4.10
  -1  -2  -2    8.80    1.60
   3  -1  -2    8.60    2.60
  -3   1   2    7.30    2.50
  -3   1   2    7.80    2.50
  -3   1   2    7.70    2.20
   1   2   2    4.00    4.60
   1   2   2   11.20    5.30
   1   2   2   10.60    4.00
   1   2   2    6.50    1.70
   1   2   2    6.60    5.00
   2  -3   2    9.20    2.20
  -3   1   2    9.30    6.30
  -3   1   2    7.30    2.30
   1   2   2   10.10    1.90
   1   2   2    9.70    2.40
   2  -3   2    6.90    2.50
   1   2   2   10.20    2.10
   2  -3   2    6.90    2.00
   2  -3   2    7.60    1.60
  -3   1   2    7.90    2.10
  -3   1   2    9.40    5.40
   2  -3   2    5.20    2.50
   2  -3   2    5.20    2.00
   1   2   2    8.80    1.60
   2  -3   2    7.80    2.10
   4  -3  -2  137.29    6.50
  -3  -1  -2  121.89    9.90
  -1   4  -2  124.59    8.90
  -1   4  -2  127.39    8.80
   4  -3  -2  131.69   13.70
  -3  -1  -2  138.79    7.80
  -3  -1  -2  142.89    7.00
   4  -3  -2  113.09    8.00
   4  -3  -2  130.89    8.60
   4  -3  -2  141.19    8.50
  -3  -1  -2  137.69    6.90
   4  -3  -2  132.69    8.40
  -1   4  -2  129.49    8.80
  -3  -1  -2  114.69   12.30
  -1   4  -2  135.79    8.70
  -3  -1  -2  141.19    7.70
   4  -3  -2  137.09   15.30
  -1   4  -2  125.49    6.60
  -1   4  -2  138.19   11.20
  -3  -1  -2  143.49   12.50
   1  -4   2  137.69    9.10
   1  -4   2  131.99   10.00
   3   1   2  148.39    8.20
   1  -4   2  112.59   15.10
   1  -4   2  122.79    8.40
   3   1   2  134.59    8.70
  -4   3   2  125.49    9.10
  -4   3   2  149.19    8.80
   3   1   2  144.19    9.50
   3   1   2  158.18   13.80
   1  -4   2  124.79    6.50
   1  -4   2  145.49   10.40
   3   1   2  143.99    6.20
  -4   3   2  136.19    8.40
  -4   3   2  125.99    8.70
   3   1   2  150.28   12.10
  -4   3   2  143.49   13.20
   1  -4   2  140.89    9.00
   3   1   2  140.49    7.70
   3   1   2  143.59    8.00
  -4   3   2  132.89    8.30
   1  -4   2  123.59    8.60
   3   1   2  142.29    7.70
  -3   2  -2    4.60    3.10
  -3   2  -2   11.50    2.40
   2   1  -2    9.30    1.60
   1  -3  -2    6.90    1.80
   1  -3  -2    9.10    5.50
   2   1  -2    9.30    2.70
  -3   2  -2   10.60    1.90
   1  -3  -2   14.00    5.40
   2   1  -2   12.60    7.40
  -3   2  -2    6.50    1.70
   2   1  -2    6.90    2.30
   2   1  -2    7.10    2.10
   1  -3  -2   10.00    2.70
  -3   2  -2    7.50    1.90
   2   1  -2    8.80    2.60
  -3   2  -2    6.30    5.40
   1  -3  -2    6.30    1.90
   2   1  -2   10.00    2.10
   1  -3  -2    6.10    1.60
  -3   2  -2    6.10    2.10
   1  -3  -2    6.70    5.10
  -1   3   2    8.50    2.10
  -1   3   2    5.70    1.70
  -1   3   2   11.70    3.10
  -1   3   2    7.20    1.90
  -2  -1   2    9.00    6.70
   3  -2   2    4.80    1.80
  -1   3   2    3.80    4.30
   3  -2   2    4.90    1.90
  -2  -1   2    9.30    2.50
  -2  -1   2    6.40    2.50
   3  -2   2    2.40    4.90
  -2  -1   2    6.40    1.90
   3  -2   2    5.40    1.90
   3  -2   2    8.20    2.00
   3  -2   2    8.60    3.00
   3  -2   2    6.40    2.10
  -1   3   2    9.70    2.10
  -1   3   2    4.70    1.60
  -1   3   2   14.30    5.70
  -1   3   2    1.00    4.60
  -2  -1   2   12.40    3.20
   5  -2  -2   44.30   10.30
   5  -2  -2   68.89    6.00
  -3   5  -2   81.69    6.80
  -2  -3  -2   66.49    5.70
  -3   5  -2   72.59    6.20
  -2  -3  -2   73.59    4.90
   5  -2  -2   55.49    7.10
  -2  -3  -2   68.99    5.10
   5  -2  -2   69.69    7.30
  -2  -3  -2   59.99   10.60
  -2  -3  -2   80.39    6.60
   5  -2  -2   76.09    6.30
  -2  -3  -2   73.49    5.50
   5  -2  -2   63.39    3.90
   5  -2  -2   61.89   10.00
  -3   5  -2   69.59    6.70
  -3   5  -2   66.19    5.10
   5  -2  -2   62.79    6.10
  -2  -3  -2   58.89   10.90
  -3   5  -2   67.69    6.80
   2   3   2   67.99    5.80
   3  -5   2   76.09    6.50
   2   3   2   72.39    3.80
   2   3   2   70.29    6.40
   2   3   2   71.69    5.40
   3  -5   2   69.09    7.70
  -5   2   2   77.19   10.60
   2   3   2   82.79   11.50
   3  -5   2   68.79    8.30
  -5   2   2   69.09    7.10
   2   3   2   63.29    9.00
  -5   2   2   67.59    6.00
  -5   2   2   51.19    7.00
   2   3   2   68.49    5.70
   3  -5   2   68.29    6.60
   3  -5   2   62.09    6.60
  -5   2   2   59.99    6.10
  -5   2   2   76.99    6.90
   3  -5   2   64.79    4.90
   3  -5   2   71.19    6.40
   2   3   2   75.19    6.50
   2   3   2   70.39   11.10
  -2   6  -2  280.17   16.10
  -4  -2  -2  253.67   16.70
  -2   6  -2  285.87   14.00
  -4  -2  -2  295.27   14.80
  -4  -2  -2  318.57   17.50
   6  -4  -2  292.07   16.10
  -4  -2  -2  294.57   20.70
  -4  -2  -2  299.97   15.20
  -2   6  -2  291.37   17.40
  -4  -2  -2  284.47   20.60
  -2   6  -2  227.68   16.90
   6  -4  -2  282.97   16.90
   6  -4  -2  276.77   16.30
  -4  -2  -2  304.87   14.80
   6  -4  -2  264.67   15.60
   6  -4  -2  266.67   20.60
  -2   6  -2  286.17   16.60
  -2   6  -2  281.27   16.60
   4   2   2  298.17   15.20
   2  -6   2  275.17   15.90
  -6   4   2  281.77   15.90
   2  -6   2  275.07   13.80
   2  -6   2  276.37   14.00
  -6   4   2  260.87   16.30
   2  -6   2  292.97   16.70
  -6   4   2  271.97   16.60
   4   2   2  301.87   15.30
   4   2   2  289.77   15.60
   2  -6   2  292.37   16.20
  -6   4   2  263.77   15.50
  -6   4   2  289.37   20.20
   4   2   2  320.77   16.40
   2  -6   2  293.07   24.30
  -6   4   2  276.67   15.80
   2  -6   2  282.07   16.40
   4   2   2  297.57   16.00
   3  -4  -2  131.09    8.40
   1   3  -2  118.19    8.60
  -4   1  -2  134.29    7.50
  -4   1  -2  141.29    8.00
  -4   1  -2  136.89    7.90
   1   3  -2  136.19    8.90
   3  -4  -2  126.59    8.60
   3  -4  -2  140.39    7.50
   3  -4  -2  137.39    8.30
   3  -4  -2  133.09    8.10
   1   3  -2  132.39    9.90
  -4   1  -2  153.18   13.90
  -4   1  -2  148.19    7.60
  -4   1  -2  140.49    7.40
   3  -4  -2  125.99   12.80
   1   3  -2  129.99    8.90
   1   3  -2  119.99   14.80
   1   3  -2  125.69    8.50
   4  -1   2  131.69    8.30
   4  -1   2  148.89    8.30
  -1  -3   2  118.59    8.60
  -3   4   2  141.69    8.10
  -3   4   2  137.19   13.00
   4  -1   2  121.29    8.90
  -3   4   2  151.98    8.70
   4  -1   2  140.29    7.40
  -3   4   2  133.49    8.10
  -3   4   2  146.39    9.10
  -1  -3   2  134.59    9.20
  -1  -3   2  122.49    8.90
   4  -1   2  154.48   13.90
  -1  -3   2  129.39    8.70
  -1  -3   2  142.59   15.90
  -3   4   2  135.09    8.70
  -3   4   2  137.99   12.50
  -1  -3   2  144.39    9.00
   4  -1   2  146.39    8.10
  -3   4   2  140.49    8.40
  -1  -3   2  125.39    9.70
   4  -1   2  132.69    7.90
   4   0  -2  477.75   24.10
   4   0  -2  483.45   24.10
   0  -4  -2  519.35   28.10
   4   0  -2  489.35   24.60
   0  -4  -2  527.95   23.50
  -4   4  -2  517.95   24.10
  -4   4  -2  472.45   23.30
   0  -4  -2  498.15   26.70
  -4   4  -2  513.65   24.00
   4   0  -2  506.85   23.60
  -4   4  -2  492.95   29.00
  -4   4  -2  528.85   24.10
  -4   4  -2  485.55   24.10
  -4   4  -2  524.15   24.40
   0  -4  -2  503.05   23.60
   4   0  -2  480.55   22.70
   0  -4  -2  528.35   29.40
   0  -4  -2  528.45   24.20
   4   0  -2  519.85   25.20
   0  -4  -2  503.15   22.70
   0  -4  -2  519.05   23.00
   4   0  -2  476.75   30.90
   4  -4   2  572.14   23.80
   4  -4   2  532.35   24.50
   0   4   2  491.95   23.50
   0   4   2  488.75   28.60
   0   4   2  520.55   23.60
  -4   0   2  472.25   22.50
  -4   0   2  486.55   24.20
  -4   0   2  505.25   24.80
   0   4   2  538.85   23.20
  -4   0   2  427.86   23.90
   0   4   2  507.85   23.70
   4  -4   2  512.75   24.40
   4  -4   2  506.85   24.20
   0   4   2  503.65   25.80
   0   4   2  527.05   24.30
  -4   0   2  484.85   25.10
   4  -4   2  514.35   24.20
  -4   0   2  461.25   22.30
   0   4   2  569.14   24.60
  -4   0   2  492.95   28.80
  -4   0   2  483.85   23.90
   0   4   2  492.05   24.30
  -4   7  -2    9.00    4.20
  -3  -4  -2   12.10    3.50
  -3  -4  -2   10.80    3.60
  -3  -4  -2   17.40    6.50
  -3  -4  -2   14.50    4.40
  -4   7  -2    9.90    3.70
  -4   7  -2   10.40    3.40
   7  -3  -2   11.80    5.10
  -3  -4  -2   16.90    4.10
   7  -3  -2    6.80    4.10
   7  -3  -2   13.90    7.40
  -4   7  -2   12.50    4.50
   7  -3  -2   12.30    2.40
   7  -3  -2   14.70    4.50
   7  -3  -2   14.50    4.20
  -3  -4  -2    9.50    8.20
   3   4   2   -6.40    8.70
  -7   3   2   14.70    8.10
   3   4   2   19.50    4.50
   4  -7   2    5.60    5.50
   3   4   2   13.30    3.60
   3   4   2    9.80    8.00
   3   4   2    6.40    4.30
  -7   3   2    6.80    3.40
   4  -7   2   11.60    4.60
  -7   3   2    9.60    5.30
   4  -7   2   14.10    5.60
   4  -7   2   12.50    3.20
   3   4   2   10.60    6.10
   4  -7   2   13.10    4.70
   4  -7   2   12.60    4.40
   3   4   2   17.80    4.50
  -7   3   2   16.80    4.70
   4  -7   2   14.30    4.10
  -7   3   2   13.70    4.40
  -7   3   2   17.60    5.00
  -5  -3  -2   -1.70    5.40
  -5  -3  -2    3.00    4.50
  -3   8  -2    4.90    4.20
   8  -5  -2   -2.50    8.00
  -5  -3  -2    3.20    3.50
  -3   8  -2    3.90    3.80
   8  -5  -2    5.80    6.40
   8  -5  -2   -2.70    4.20
   8  -5  -2    2.20    4.00
  -5  -3  -2    0.90    3.40
  -3   8  -2   -1.10    2.80
  -3   8  -2   -0.60    4.20
  -5  -3  -2    1.80    3.10
   8  -5  -2   -0.30    4.50
  -5  -3  -2    2.50    4.20
   8  -5  -2    6.20    3.50
  -5  -3  -2   -3.30    7.70
  -3   8  -2    4.60    5.70
  -3   8  -2   -1.20    5.40
   3  -8   2    7.00    6.10
   5   3   2   -2.00    9.90
  -8   5   2    3.20    3.40
   5   3   2    5.20    4.40
   3  -8   2   -1.60    4.20
  -8   5   2   -3.40    3.10
   5   3   2    3.90    4.70
   5   3   2   -2.90    3.00
   5   3   2    3.00    3.30
   3  -8   2   -6.70    6.00
   3  -8   2   -3.40    2.50
   5   3   2    0.50    4.10
  -8   5   2   -2.10    4.10
   3  -8   2   -1.80    3.10
  -8   5   2    3.70    4.70
   3  -8   2    2.90    4.00
   3  -8   2    1.20    4.20
  -8   5   2   -5.20    4.90
   3  -8   2   -2.60    4.00
   0   5  -2 2231.58   98.19
  -5   0  -2 2315.27  100.69
  -5   0  -2 2318.47   99.29
   5  -5  -2 2207.38   99.99
  -5   0  -2 2245.88   97.59
   5  -5  -2 2215.08  100.29
  -5   0  -2 2353.76   99.29
   5  -5  -2 2279.37  100.69
   5  -5  -2 2216.98  105.39
   0   5  -2 2213.18  101.79
  -5   0  -2 2219.08   99.29
   5  -5  -2 2348.47  100.39
   0   5  -2 2190.78  100.79
   0   5  -2 2419.66  102.09
   0   5  -2 2360.16  100.59
  -5   0  -2 2277.07  104.29
   5  -5  -2 2392.36   98.99
   5  -5  -2 2316.97  100.39
  -5   0  -2 2309.47  106.29
   0   5  -2 2340.37  100.79
   0   5  -2 2350.16  100.99
  -5   5   2 2282.47  100.29
  -5   5   2 2334.97  100.59
   0  -5   2 2362.06  100.69
   0  -5   2 2164.28  100.79
   5   0   2 2393.86  100.09
   5   0   2 2341.57   99.69
   0  -5   2 2337.37  100.49
   0  -5   2 2199.88  100.89
   0  -5   2 2267.87  107.89
  -5   5   2 2390.96  100.69
  -5   5   2 2299.87  100.19
   0  -5   2 2252.97  102.09
   0  -5   2 2368.16  101.39
  -5   5   2 2341.87  101.39
   5   0   2 2468.45  107.09
   5   0   2 2412.16   99.79
   5   0   2 2246.08  100.49
   5   0   2 2301.97  100.19
  -5   5   2 2298.77  104.59
  -5   3  -2   60.99    7.30
   2  -5  -2   78.89    5.90
  -5   3  -2   70.39    6.20
   3   2  -2   67.29    7.70
   2  -5  -2   62.49   10.50
   2  -5  -2   61.09    5.50
   2  -5  -2   69.59    5.80
   3   2  -2   68.19    6.30
   2  -5  -2   73.09    6.30
   2  -5  -2   62.89   10.00
   3   2  -2   71.49    7.00
   2  -5  -2   80.99    6.60
   3   2  -2   70.69    6.40
   2  -5  -2   74.89   10.50
  -5   3  -2   73.99   11.50
   3   2  -2   72.39   13.50
   3   2  -2   71.69    5.60
  -5   3  -2   64.89    6.40
  -5   3  -2   68.89    5.70
  -5   3  -2   62.39    5.80
   3   2  -2   70.99    6.30
   5  -3   2   71.79    6.00
  -2   5   2   64.39    5.70
  -2   5   2   76.89    6.50
   5  -3   2   68.19    5.90
  -2   5   2   64.49    6.10
  -3  -2   2   65.89    6.60
  -2   5   2   65.89   10.90
  -3  -2   2   67.09   12.00
  -3  -2   2   74.89    8.10
  -3  -2   2   66.09    5.90
   5  -3   2   74.99    7.00
  -3  -2   2   64.29    5.50
  -2   5   2   71.99    6.40
   5  -3   2   66.99    6.00
  -2   5   2   66.79    7.00
  -3  -2   2   69.69    6.40
   5  -3   2   72.39    7.20
  -3  -2   2   63.39    6.80
  -2   5   2   76.19    6.30
   5  -3   2   65.29    6.40
  -2   5   2   66.69    6.00
  -1  -5  -2 1045.10   53.09
  -1  -5  -2 1068.09   50.69
   6  -1  -2  940.81   47.40
   6  -1  -2  989.50   47.10
  -1  -5  -2 1074.89   46.20
  -5   6  -2 1040.10   48.00
  -5   6  -2 1030.80   47.30
  -5   6  -2 1059.89   47.30
  -5   6  -2 1042.70   47.20
   6  -1  -2  963.20   44.80
   6  -1  -2  975.20   55.09
  -5   6  -2  998.20   47.80
  -5   6  -2 1105.09   46.70
   6  -1  -2 1002.80   48.10
  -5   6  -2  974.50   44.00
   6  -1  -2  984.40   46.50
  -1  -5  -2 1016.70   46.20
   1   5   2 1046.50   52.49
   5  -6   2 1098.09   46.10
   1   5   2 1146.39   47.70
   1   5   2 1029.00   46.70
   5  -6   2 1007.00   47.40
  -6   1   2  962.90   51.09
  -6   1   2  970.30   47.60
   5  -6   2 1087.69   47.30
   1   5   2 1074.19   44.70
   1   5   2 1066.39   45.80
   1   5   2 1029.10   46.60
   1   5   2 1070.29   46.50
   5  -6   2 1065.09   47.30
  -6   1   2  956.70   46.50
  -6   1   2  985.20   47.10
   5  -6   2 1039.50   47.60
  -6   1   2  956.70   47.00
  -6   1   2  903.61   47.90
  -6   1   2 1007.30   47.20
   1   5   2 1079.39   47.80
   9  -4  -2  125.29    8.50
  -4  -5  -2  137.69   11.10
  -4  -5  -2  143.19   12.20
  -5   9  -2  116.59   12.20
  -4  -5  -2  145.89   14.80
   9  -4  -2  130.99   11.80
   9  -4  -2  130.59   14.50
   9  -4  -2  120.69   11.70
   9  -4  -2  126.49   13.10
  -4  -5  -2  132.89   10.80
  -5   9  -2  137.89   13.20
  -5   9  -2  143.39   12.30
  -4  -5  -2  136.59   10.90
  -5   9  -2  126.49   13.00
  -5   9  -2  129.89    9.90
   9  -4  -2  135.59   12.20
  -4  -5  -2  141.09   11.60
  -4  -5  -2  159.68   19.60
   5  -9   2  122.09   12.80
  -9   4   2  135.29   13.10
   4   5   2  138.89   10.90
   5  -9   2  123.99   12.40
   5  -9   2  123.69    9.60
   4   5   2  132.49   19.00
   5  -9   2  129.69   11.70
   5  -9   2  129.09   12.70
  -9   4   2  116.69   13.50
   5  -9   2  147.99   15.10
   5  -9   2  116.49   14.40
   4   5   2  140.89   13.30
  -9   4   2  118.49   11.60
   4   5   2  139.09   11.60
   4   5   2  127.59   11.10
  -9   4   2  115.99   11.20
   4   5   2  139.89   12.20
  -9   4   2  126.99   12.20
  -6  -4  -2  304.07   19.30
  10  -6  -2  247.28   18.30
  -6  -4  -2  315.47   18.00
  -6  -4  -2  297.37   18.30
  10  -6  -2  291.77   19.20
  10  -6  -2  273.37   20.50
  -6  -4  -2  304.37   18.50
  10  -6  -2  316.77   25.50
  -6  -4  -2  311.67   20.20
  -4  10  -2  302.77   19.00
  -4  10  -2  306.97   20.20
  10  -6  -2  245.18   21.20
  -6  -4  -2  280.87   17.80
  -4  10  -2  297.87   19.30
  -4  10  -2  274.97   16.20
  -4  10  -2  288.97   21.70
  -6  -4  -2  285.07   25.80
  -4  10  -2  281.77   20.20
  10  -6  -2  294.67   18.80
   4 -10   2  246.88   19.10
   4 -10   2  276.47   19.50
 -10   6   2  283.27   22.80
   6   4   2  296.87   19.40
 -10   6   2  290.07   20.60
 -10   6   2  247.78   19.70
   4 -10   2  264.67   21.80
 -10   6   2  262.77   19.60
   4 -10   2  224.58   20.00
   6   4   2  313.47   20.50
   4 -10   2  345.17   19.70
   6   4   2  296.27   17.90
   6   4   2  305.87   18.90
   6   4   2  281.47   27.40
 -10   6   2  267.57   19.00
   6   4   2  272.67   17.90
   4 -10   2  289.77   19.70
 -10   6   2  304.17   19.30
   4 -10   2  236.68   17.10
  -6  -1  -2  168.98   11.10
  -1   7  -2  162.28   12.90
  -1   7  -2  173.88   14.00
   7  -6  -2  153.38   11.50
   7  -6  -2  155.08   11.90
  -1   7  -2  162.78   14.30
  -6  -1  -2  171.88   17.20
  -6  -1  -2  165.48   10.80
  -6  -1  -2  142.79   10.70
  -6  -1  -2  153.08    7.10
  -6  -1  -2  155.58   11.00
  -1   7  -2  145.89   12.50
   7  -6  -2  153.88   11.20
   7  -6  -2  149.59   10.40
   7  -6  -2  160.58   11.60
  -6  -1  -2  158.58   16.50
  -1   7  -2  161.78   11.60
   7  -6  -2  137.39   17.00
   1  -7   2  145.19   14.30
  -7   6   2  155.58   12.70
   1  -7   2  157.98   11.70
   1  -7   2  159.48   12.00
   1  -7   2  160.88   12.30
   6   1   2  162.58   11.90
   6   1   2  153.98   11.40
  -7   6   2  149.59   11.30
   1  -7   2  154.98   11.80
  -7   6   2  145.09   12.70
   1  -7   2  152.48   12.70
  -7   6   2  153.88   11.70
   1  -7   2  170.78   21.90
   6   1   2  179.78   11.30
   6   1   2  172.28   18.90
   1  -7   2  168.38   12.40
   6   1   2  166.28   10.70
  -7   6   2  168.38   11.80
  -7   6   2  165.68   15.70
   2   4  -2  281.67   16.50
   2   4  -2  292.17   16.70
   4  -6  -2  273.37   16.00
   4  -6  -2  299.47   15.80
   2   4  -2  276.97   16.30
   2   4  -2  271.67   15.70
  -6   2  -2  298.97   15.40
  -6   2  -2  292.87   23.00
   2   4  -2  290.87   17.80
   4  -6  -2  266.77   17.50
   4  -6  -2  280.77   21.00
   4  -6  -2  301.37   15.20
   2   4  -2  284.67   23.80
   4  -6  -2  298.77   15.80
  -6   2  -2  275.07   14.20
  -6   2  -2  274.97   15.60
   4  -6  -2  261.97   16.10
   2   4  -2  305.17   16.90
  -6   2  -2  232.98   14.80
  -6   2  -2  317.47   15.80
  -6   2  -2  302.67   18.80
  -2  -4   2  283.37   16.00
  -4   6   2  293.97   16.20
  -2  -4   2  305.77   16.70
  -4   6   2  332.37   16.60
   6  -2   2  297.47   15.40
  -4   6   2  277.57   16.70
   6  -2   2  304.47   16.30
  -2  -4   2  265.27   23.00
   6  -2   2  298.37   16.20
  -2  -4   2  291.27   16.30
   6  -2   2  277.57   13.80
   6  -2   2  246.48   24.50
  -2  -4   2  274.17   16.70
   6  -2   2  270.07   16.60
  -2  -4   2  276.67   15.60
   6  -2   2  298.47   15.70
  -4   6   2  291.87   16.60
   6  -2   2  287.77   14.60
  -4   6   2  262.27   17.80
  -4   6   2  277.37   15.90
  -4   6   2  282.17   20.90
  -4   6   2  289.17   15.80
  -6   5  -2 1074.49   48.10
   5   1  -2 1062.79   48.90
   1  -6  -2 1039.30   47.70
   1  -6  -2 1053.09   52.59
  -6   5  -2 1065.89   48.30
   1  -6  -2 1074.89   47.60
  -6   5  -2 1086.79   54.99
   1  -6  -2 1041.90   49.60
  -6   5  -2 1061.59   47.50
   5   1  -2  993.10   55.79
   5   1  -2  968.30   48.30
   1  -6  -2 1055.69   47.30
   1  -6  -2 1019.90   53.19
  -6   5  -2 1054.09   47.80
  -6   5  -2 1084.99   48.30
   5   1  -2 1004.80   49.20
   5   1  -2 1051.49   47.40
   5   1  -2 1019.80   48.10
   1  -6  -2 1077.49   47.10
  -6   5  -2 1119.39   47.90
  -1   6   2 1081.59   48.20
  -1   6   2 1078.69   47.60
  -5  -1   2  941.21   48.90
   6  -5   2 1056.99   48.30
  -1   6   2  837.12   54.89
  -1   6   2 1061.89   48.80
   6  -5   2 1098.69   47.60
   6  -5   2 1089.59   49.50
  -5  -1   2  989.00   48.20
  -1   6   2 1110.79   46.80
  -1   6   2 1104.99   47.80
   6  -5   2 1055.79   48.00
  -5  -1   2  981.90   48.40
  -5  -1   2 1014.10   48.20
   6  -5   2 1000.80   47.50
  -1   6   2 1094.39   48.20
   6  -5   2 1101.99   48.30
  -5  -1   2  969.10   46.30
  -1   6   2 1048.70   47.70
   8  -2  -2   -4.10    5.10
  -2  -6  -2    3.80    3.90
   8  -2  -2   -2.90    4.70
  -6   8  -2    5.70    4.00
  -6   8  -2    3.60    5.00
   8  -2  -2    1.70    4.50
  -2  -6  -2    3.50    3.40
   8  -2  -2   -3.70    5.30
  -2  -6  -2   14.80    9.60
  -6   8  -2    3.40    4.20
   8  -2  -2    0.00    2.50
  -6   8  -2    2.80    4.70
   8  -2  -2   -1.60    3.40
  -2  -6  -2    1.70    3.80
  -6   8  -2   -0.20    5.20
  -2  -6  -2    0.30    4.60
  -6   8  -2    1.80    4.50
  -6   8  -2   -0.50    1.90
  -2  -6  -2   11.30    7.00
  -2  -6  -2   -0.40    4.40
  -8   2   2   -0.90    5.00
   6  -8   2    2.20    3.80
  -8   2   2    2.90    6.00
   6  -8   2   -1.00    6.70
  -8   2   2    2.00    3.90
   6  -8   2    4.80    4.50
   2   6   2    3.70    4.00
   2   6   2    1.50    4.80
   2   6   2    9.20    9.50
   6  -8   2   -8.40    4.80
  -8   2   2    4.60    4.40
   2   6   2    0.10    4.20
   2   6   2   -1.10    2.90
   2   6   2   -1.50    9.30
  -8   2   2   -4.20    6.40
   2   6   2    1.00    2.10
   6  -8   2    7.50    6.10
  -8   2   2    1.70    3.90
   6  -8   2    7.00    4.60
   6  -8   2    9.90    4.10
  -8   2   2   12.70    8.30
   2   6   2   -2.00    4.40
  11  -5  -2 1724.13   83.39
  -6  11  -2 1823.92   82.89
  -5  -6  -2 1870.61   80.89
  -6  11  -2 1811.32   83.09
  -5  -6  -2 1847.12   82.59
  -5  -6  -2 1906.71   81.89
  -6  11  -2 1783.92   81.99
  -5  -6  -2 1890.61   85.49
  -5  -6  -2 1913.91   91.89
  11  -5  -2 1808.02   82.39
  11  -5  -2 1661.03   83.69
  -6  11  -2 1820.92   83.79
  11  -5  -2 1870.01   82.59
  -5  -6  -2 1762.82   81.69
  11  -5  -2 1739.73   81.99
  -6  11  -2 1797.12   80.19
  11  -5  -2 1722.23   78.49
  -5  -6  -2 1852.61   81.49
   5   6   2 1840.72   84.09
 -11   5   2 1642.54   82.99
   5   6   2 1776.12   81.59
   5   6   2 1777.02   82.39
   5   6   2 1851.71   81.69
   5   6   2 1883.01   82.89
 -11   5   2 1641.54   82.59
 -11   5   2 1762.92   82.59
   6 -11   2 1629.84   84.59
   5   6   2 1783.02   79.69
   5   6   2 1739.03   90.39
   6 -11   2 1831.82   83.49
   6 -11   2 1763.82   79.79
 -11   5   2 1768.22   84.99
   6 -11   2 1806.42   82.39
 -11   5   2 1819.62   82.69
 -11   5   2 1760.22   83.69
   6 -11   2 1838.92   82.99
   6 -11   2 1711.23   84.49
   6 -11   2 1705.33   82.99
  12  -7  -2  191.78   17.60
  -7  -5  -2  213.48   27.10
  12  -7  -2  208.08   19.40
  -5  12  -2  172.78   16.80
  -5  12  -2  208.98   17.30
  12  -7  -2  194.08   18.30
  12  -7  -2  177.28   16.70
  -7  -5  -2  190.98   16.50
  -5  12  -2  172.68   20.00
  -5  12  -2  206.48   19.50
  12  -7  -2  213.88   25.30
  -7  -5  -2  196.88   16.60
  -5  12  -2  226.48   21.60
  12  -7  -2  228.58   22.50
  -7  -5  -2  207.08   18.90
  -5  12  -2  191.78   14.20
  -7  -5  -2  191.68   16.30
  -7  -5  -2  203.18   17.90
   7   5   2  171.78   16.00
   5 -12   2  205.58   18.70
   7   5   2  180.68   15.60
 -12   7   2  164.58   17.20
   5 -12   2  186.38   17.40
   5 -12   2  178.98   14.10
 -12   7   2  197.08   19.50
 -12   7   2  200.38   19.60
   7   5   2  206.58   16.50
 -12   7   2  204.38   21.50
   7   5   2  167.98   25.90
   7   5   2  183.78   19.40
   5 -12   2  175.68   18.10
 -12   7   2  204.18   17.50
   7   5   2  158.28   18.50
 -12   7   2  187.28   17.80
   5 -12   2  185.38   18.80
   9  -7  -2  125.99   12.40
  -7  -2  -2  109.29   17.80
  -2   9  -2  120.39   14.80
  -7  -2  -2  117.09   11.60
  -2   9  -2  119.29    9.10
  -7  -2  -2  136.69   11.50
  -7  -2  -2  129.49   11.60
  -2   9  -2  129.49   13.10
  -7  -2  -2  115.59   16.70
  -7  -2  -2  132.09   11.10
  -2   9  -2  123.89   13.60
   9  -7  -2  121.69   10.90
  -2   9  -2  132.89   12.10
  -2   9  -2  115.69   14.40
   9  -7  -2  146.19   18.70
   9  -7  -2  131.09   13.10
  -2   9  -2  121.19   11.70
  -7  -2  -2  155.98   19.80
   9  -7  -2  134.29   12.60
   2  -9   2  111.49   13.00
   2  -9   2  141.39   16.80
   2  -9   2  146.99   13.40
  -9   7   2  146.09   12.50
   2  -9   2  116.09   12.10
  -9   7   2  138.69   12.50
   7   2   2  131.39   11.30
   2  -9   2  123.49   13.20
   7   2   2  139.09   20.50
  -9   7   2  117.29   14.20
  -9   7   2  155.38   17.20
   7   2   2  110.99   11.20
   2  -9   2  139.89   12.80
   7   2   2  145.59   13.30
  -9   7   2  105.99   12.70
   2  -9   2  175.58   27.50
   2  -9   2  139.39   11.70
   7   2   2  136.69   11.20
  -9   7   2  122.49   13.20
  -9   7   2  124.09   11.70
   7   2   2  142.79   13.00
  -7   1  -2  162.78   11.20
  -7   1  -2  163.58   11.40
   1   6  -2  164.68   11.70
   6  -7  -2  181.88   12.20
   6  -7  -2  172.38   12.20
  -7   1  -2  152.68   14.70
   1   6  -2  170.68   19.30
   1   6  -2  165.58   14.00
   6  -7  -2  167.48   11.80
   1   6  -2  176.48   13.30
   1   6  -2  147.49   12.40
   6  -7  -2  171.28   13.30
   1   6  -2  141.29   12.50
   1   6  -2  152.18   12.40
  -7   1  -2  143.19    8.60
  -7   1  -2  151.28   10.80
   6  -7  -2  160.08   11.50
   6  -7  -2  155.08   10.70
  -7   1  -2  158.28   10.80
   6  -7  -2  186.88   18.40
  -7   1  -2  163.48   18.90
   7  -1   2  152.68   12.00
  -1  -6   2  163.88   12.50
   7  -1   2  145.59   10.70
   7  -1   2  183.48   18.80
  -6   7   2  167.98   11.80
  -1  -6   2  175.18   12.50
  -6   7   2  152.98   12.10
  -6   7   2  165.28   13.20
   7  -1   2  154.78   10.80
  -6   7   2  163.08   11.50
  -1  -6   2  147.89   12.20
  -6   7   2  152.48   11.60
  -1  -6   2  157.08   14.20
   7  -1   2  142.19   11.00
  -1  -6   2  164.68   20.30
  -1  -6   2  134.99   11.60
   7  -1   2  147.89   12.00
  -6   7   2  168.58   12.70
  -1  -6   2  158.68   11.20
   4   3  -2    9.10    5.20
   3  -7  -2    7.80    4.00
   3  -7  -2   13.20    5.00
   4   3  -2   11.00    3.50
  -7   4  -2   10.20    8.90
   3  -7  -2    7.90    7.70
   4   3  -2    9.60    5.20
  -7   4  -2   12.00    4.10
  -7   4  -2   11.40    3.80
  -7   4  -2   10.90    3.70
   4   3  -2   12.20    4.60
   3  -7  -2   12.00    3.90
   3  -7  -2   22.50    8.40
   3  -7  -2   14.90    4.30
  -7   4  -2   15.50    4.10
   3  -7  -2   10.60    8.00
   3  -7  -2   12.40    3.70
  -7   4  -2   12.30    4.20
   4   3  -2   14.40    5.80
   4   3  -2   17.00   10.30
   4   3  -2   14.00    4.20
   3  -7  -2   14.00    4.00
  -3   7   2   14.40    3.80
  -4  -3   2   14.20    5.70
  -3   7   2    4.70    3.80
  -4  -3   2    5.80    3.40
  -3   7   2   14.40    4.00
  -3   7   2   14.20    4.80
  -3   7   2   12.40    8.70
  -4  -3   2    8.50    4.30
  -3   7   2   11.10    4.80
   7  -4   2   12.10    3.50
  -4  -3   2    7.80    3.40
   7  -4   2   22.60    4.40
  -4  -3   2   12.10    3.70
   7  -4   2   17.10    4.50
   7  -4   2   10.40    4.80
  -3   7   2   15.00    4.20
  -3   7   2    5.40    4.40
   7  -4   2   15.00    6.90
   7  -4   2   13.00    4.70
  -4  -3   2    8.00    3.50
  -7   7  -2  167.88   13.00
  -7   7  -2  168.48   12.40
   7   0  -2  177.38   22.50
   7   0  -2  153.28   13.70
   0  -7  -2  179.88   12.20
  -7   7  -2  174.18   12.40
   0  -7  -2  198.18   13.00
  -7   7  -2  176.08   12.80
  -7   7  -2  164.38   12.70
   0  -7  -2  173.78   12.30
   0  -7  -2  191.78   12.60
   7   0  -2  168.48   10.60
   0  -7  -2  172.98   16.80
  -7   7  -2  170.38   13.60
   7   0  -2  164.98   14.40
   7   0  -2  150.88   12.30
   0  -7  -2  173.38   19.10
   0  -7  -2  179.38   11.50
   7   0  -2  172.98   12.70
   0   7   2  181.18   12.30
  -7   0   2  192.18   18.90
  -7   0   2  160.18   13.40
   7  -7   2  177.58   13.00
   0   7   2  171.28   14.00
   7  -7   2  167.18   13.50
   0   7   2  175.68   12.10
   0   7   2  187.48   10.50
  -7   0   2  161.68   11.70
   7  -7   2  183.08   12.70
  -7   0   2  170.38   12.60
  -7   0   2  177.98   14.40
   0   7   2  191.08   19.70
   0   7   2  156.88   12.70
   7  -7   2  166.48   14.80
   7  -7   2  185.88   13.40
   0   7   2  191.08   13.10
  -7   0   2  152.38   10.40
   0   7   2  175.38   12.40
   7  -7   2  168.58   11.70
  -7  10  -2   49.99    4.80
  -3  -7  -2   69.69   12.10
  -3  -7  -2   67.79    9.80
  -7  10  -2   61.99   11.70
  10  -3  -2   39.00    7.10
  -3  -7  -2   58.89   15.20
  -7  10  -2   54.19   10.20
  10  -3  -2   54.09    6.50
  10  -3  -2   69.49    9.90
  10  -3  -2   70.39    9.90
  -3  -7  -2   57.39    8.80
  -3  -7  -2   63.19    9.20
  10  -3  -2   49.20   10.10
  10  -3  -2   54.49   10.30
  -3  -7  -2   58.19    8.60
  -7  10  -2   58.79    9.30
  -7  10  -2   34.10    7.60
  -7  10  -2   66.99    9.60
  -7  10  -2   45.20    7.20
  -3  -7  -2   47.80    7.50
   3   7   2   56.59    5.10
   7 -10   2   59.39   12.30
   7 -10   2   52.59    9.10
   3   7   2   51.09    9.30
 -10   3   2   65.79   11.10
   3   7   2   58.99   10.40
   7 -10   2   41.00    9.30
   7 -10   2   40.60    8.20
   7 -10   2   69.99   10.70
 -10   3   2   57.59   10.80
   7 -10   2   41.80   11.70
 -10   3   2   58.79   11.00
   3   7   2   43.40    7.90
   3   7   2   31.10   15.20
   3   7   2   58.39    9.80
 -10   3   2   38.70   13.70
 -10   3   2   70.99   13.70
   7 -10   2   58.79    7.90
   3   7   2   54.89    8.70
 -10   3   2   60.39   10.10
  13  -6  -2  118.69   16.20
  -6  -7  -2  165.58   20.90
  13  -6  -2  134.19   18.10
  13  -6  -2  126.89   11.30
  -6  -7  -2  161.28   26.20
  -7  13  -2  106.39   17.40
  -6  -7  -2  117.79   16.20
  -7  13  -2  158.58   14.30
  13  -6  -2  120.49   15.20
  -7  13  -2  113.29   16.10
  13  -6  -2   95.29   17.30
  -7  13  -2  156.08   16.70
  -6  -7  -2  127.99   15.80
  -6  -7  -2  152.08   16.50
  13  -6  -2  148.89   18.90
  -6  -7  -2  116.39   15.40
 -13   6   2  146.39   18.20
   6   7   2  190.88   28.80
   6   7   2  114.69   15.70
 -13   6   2  135.99   18.40
   6   7   2  174.78   17.60
 -13   6   2  132.79   17.80
   6   7   2  140.69   15.30
   7 -13   2  134.99   18.00
   7 -13   2  154.18   17.70
   7 -13   2  124.49   13.70
 -13   6   2  162.48   23.30
 -13   6   2  147.89   17.70
 -13   6   2  159.98   17.10
   7 -13   2  122.99   17.20
 -13   6   2   95.89   14.90
   7 -13   2  132.39   15.90
   6   7   2  159.48   20.20
   6   7   2  143.59   16.10
  -8  -6  -2   19.20    9.60
  14  -8  -2   26.80   16.30
  14  -8  -2  -13.40   10.70
  -6  14  -2   -3.40   11.90
  14  -8  -2   20.90   12.70
  -8  -6  -2   -3.20   12.00
  -8  -6  -2   12.40    9.10
  -6  14  -2   13.30   12.80
  -8  -6  -2   -8.80   19.10
  -6  14  -2  -14.70    6.60
  14  -8  -2   14.50    9.70
  -8  -6  -2   18.50   11.70
  -6  14  -2    7.00    8.30
 -14   8   2   10.30   11.40
   8   6   2    0.30    8.40
   8   6   2   -1.40    7.50
 -14   8   2    3.50    7.50
   8   6   2   25.70   13.80
   6 -14   2   10.40    9.00
   6 -14   2   -6.00   10.40
 -14   8   2   -2.80   11.30
 -14   8   2   -7.50    8.50
   6 -14   2   33.10   28.30
   6 -14   2  -11.00    7.70
   6 -14   2    7.00   11.10
   8   6   2    6.80   12.50
   6 -14   2   -1.10    9.90
   8   6   2   43.80   25.90
   8   6   2    3.40    8.50
  -8  -3  -2   22.40    8.30
  -3  11  -2   30.60    5.60
  -3  11  -2   18.40    9.90
  -3  11  -2   14.40   10.30
  -8  -3  -2   23.70    7.40
  -3  11  -2   15.10    6.50
  -3  11  -2   17.70    6.50
  -3  11  -2   18.10    9.40
  11  -8  -2   94.09   16.80
  -8  -3  -2   31.90    7.90
  -3  11  -2   17.70    8.60
  -8  -3  -2   25.40    8.10
  -8  -3  -2   44.50   15.00
  -8  -3  -2   32.20    7.00
   8   3   2   36.70    8.20
   3 -11   2   46.40   10.20
   3 -11   2   33.60    9.00
   8   3   2   21.80    8.60
   3 -11   2   32.80    8.50
   8   3   2   17.10    6.40
   3 -11   2   31.60    8.10
   3 -11   2   32.70    9.60
   3 -11   2    9.90   11.50
   8   3   2   11.00   16.60
   8   3   2   25.00    7.20
   3 -11   2   14.30   18.40
   8   3   2   27.70    9.30
   3 -11   2   31.30   10.30
   0   8  -2  105.99   13.50
   8  -8  -2  109.69   11.70
  -8   0  -2   98.59    6.30
   0   8  -2   87.99   11.10
   0   8  -2  104.29    8.00
   8  -8  -2  103.69   17.10
   8  -8  -2  118.49   13.10
  -8   0  -2  110.99   16.20
  -8   0  -2   90.79   10.00
   0   8  -2  112.19   14.00
   8  -8  -2   93.99   10.80
   0   8  -2   99.99   10.60
   8  -8  -2  105.59   10.40
   0   8  -2  107.59   12.50
  -8   0  -2   93.49    9.50
  -8   0  -2  114.59   18.50
   8  -8  -2   94.49   11.40
  -8   0  -2   89.19   10.10
   8  -8  -2   97.69   10.30
   0   8  -2   96.09   10.60
  -8   8   2  107.69   10.50
   8   0   2  109.69   11.60
  -8   8   2  106.29   11.90
   0  -8   2  101.19   11.30
   0  -8   2   91.29   11.00
   8   0   2   80.79    9.90
  -8   8   2   86.29   11.20
   8   0   2  107.99   18.40
   0  -8   2   79.99   17.10
   8   0   2  110.89   10.30
  -8   8   2   91.99   10.70
   0  -8   2  105.69   11.80
   0  -8   2  115.59   14.60
  -8   8   2  102.89   11.00
  -8   8   2  106.69   13.30
   8   0   2   94.19   11.70
   8   0   2   91.89    9.70
   0  -8   2  101.09   12.20
   0  -8   2  105.29   10.50
   0  -8   2  120.89   12.30
  -8   3  -2    0.60    3.70
  -8   3  -2   -0.90    4.10
   5  -8  -2    0.40    5.60
   3   5  -2    4.00    5.50
  -8   3  -2   -3.80    3.80
   3   5  -2   -3.40    5.30
   5  -8  -2   -5.20    4.20
   5  -8  -2    4.00    3.90
   3   5  -2   -2.70    4.20
   5  -8  -2   -1.60    8.00
   5  -8  -2    5.80    4.10
   5  -8  -2    0.60    4.50
   3   5  -2    2.60    9.80
   5  -8  -2    1.80    3.70
  -8   3  -2   -2.90    2.90
   3   5  -2    2.00    3.90
  -8   3  -2   -1.10    3.40
  -8   3  -2    8.60    9.80
  -5   8   2    2.20    3.40
   8  -3   2    4.90    4.40
  -5   8   2   10.20    9.80
   8  -3   2   -0.70    3.30
  -5   8   2    5.90    3.70
  -5   8   2    1.30    4.60
  -5   8   2    1.40    4.40
   8  -3   2    1.20    3.70
  -3  -5   2   -1.20    3.40
   8  -3   2   -1.50    4.60
   8  -3   2    2.80    5.60
  -5   8   2    3.00    4.00
  -5   8   2   -5.30    4.10
  -3  -5   2    6.60    6.40
  -3  -5   2   -4.10    3.40
  -3  -5   2    3.80    9.80
  -5   8   2    4.60    4.60
  -3  -5   2   -2.40    4.60
  -3  -5   2    2.20    4.20
  -3  -5   2    4.80    4.30
   2  -8  -2   -2.40    7.90
  -8   6  -2    2.80    4.70
  -8   6  -2    5.90    5.10
   2  -8  -2   -6.50    8.30
  -8   6  -2    0.30   10.10
  -8   6  -2    0.80    3.60
   2  -8  -2    2.10    6.60
   2  -8  -2    2.30    4.30
   6   2  -2    6.60   10.80
   2  -8  -2    4.50    5.10
   6   2  -2   -0.60    4.00
   6   2  -2    4.10    5.80
   6   2  -2    4.60    3.80
   6   2  -2    0.60    3.30
   6   2  -2    1.10    6.00
   2  -8  -2    1.30    3.70
   2  -8  -2    9.10    4.30
  -8   6  -2   -2.70    4.60
  -8   6  -2    3.20    4.30
  -8   6  -2   -2.90    4.20
   6   2  -2    7.90    4.80
   2  -8  -2    7.00    4.20
  -6  -2   2    1.80    3.30
  -2   8   2   -1.60    3.70
  -6  -2   2    7.80    5.40
  -6  -2   2    2.10    3.30
   8  -6   2    8.00    4.40
  -2   8   2    5.30    4.20
  -2   8   2   -7.70    8.90
   8  -6   2   -6.00    5.80
  -2   8   2    5.10    5.10
  -6  -2   2    6.20    4.60
  -2   8   2    3.00    4.40
  -2   8   2   -1.00    4.10
  -6  -2   2    1.80    6.30
  -6  -2   2    5.60    4.20
   8  -6   2    2.90    3.70
   8  -6   2    3.20    4.50
  -2   8   2    7.40    5.30
  -2   8   2   -0.80    3.50
   8  -6   2    7.40    5.00
   8  -6   2   -4.40    4.30
  -8   9  -2   85.29   10.60
   9  -1  -2   81.49   12.40
  -1  -8  -2   99.89   10.10
   9  -1  -2  100.99   11.50
  -1  -8  -2  117.09   19.40
  -8   9  -2   98.69   12.20
  -1  -8  -2  122.69   11.80
   9  -1  -2   89.59   12.10
  -8   9  -2   82.79   10.50
  -8   9  -2  101.39   12.10
  -1  -8  -2  110.49   16.80
  -1  -8  -2   89.39   10.40
   9  -1  -2   70.39    9.50
   9  -1  -2   91.59    8.10
  -8   9  -2   90.09   11.20
   9  -1  -2   92.69   20.10
  -8   9  -2   87.09   11.50
  -1  -8  -2   87.89   11.20
  -1  -8  -2  100.39   12.30
   9  -1  -2   76.59    9.70
   1   8   2  100.19   10.30
   1   8   2   95.79   11.50
   8  -9   2   95.69   10.20
  -9   1   2   82.09   11.30
   8  -9   2  122.39   14.70
   8  -9   2  111.79   12.60
   1   8   2   91.89   11.80
   1   8   2  100.39    7.90
   1   8   2   74.39    9.90
   8  -9   2   90.89   12.20
  -9   1   2   95.59   12.40
  -9   1   2   97.79   10.80
   8  -9   2   80.29   11.20
   1   8   2   78.89   11.30
  -9   1   2   92.19   11.90
   8  -9   2   94.09   11.40
   1   8   2  111.29   17.50
   1   8   2  111.39   10.70
  -4  -8  -2  156.28   20.50
  12  -4  -2  139.39   16.00
  12  -4  -2  139.09   17.10
  -8  12  -2  138.49   17.70
  -4  -8  -2  143.49   15.10
  -4  -8  -2  172.88   25.10
  -8  12  -2  148.39   16.90
  12  -4  -2  130.49   11.30
  -4  -8  -2  162.58   15.00
  -8  12  -2  157.08   13.90
  -4  -8  -2  135.59   15.20
  -8  12  -2  175.48   15.90
  12  -4  -2  109.99   15.50
  12  -4  -2  106.09   16.70
  12  -4  -2  166.28   15.50
  -8  12  -2  165.68   20.10
  -4  -8  -2  162.68   16.80
   8 -12   2  143.59   19.10
 -12   4   2  127.29   18.00
   4   8   2  139.49   14.00
   4   8   2  138.19   18.10
 -12   4   2  149.49   17.10
 -12   4   2  129.19   15.50
   4   8   2  140.99   26.20
   8 -12   2  144.39   18.00
   4   8   2  154.18   16.50
   8 -12   2  159.98   15.90
   4   8   2  157.48   18.60
   8 -12   2  141.99   13.50
 -12   4   2  138.09   16.90
 -12   4   2  166.18   20.40
   8 -12   2  149.19   17.30
   8 -12   2  159.98   17.00
  -7  -8  -2   51.69   15.00
  -8  15  -2   46.20   11.70
  15  -7  -2   71.29   14.40
  -7  -8  -2   69.59   12.90
  -7  -8  -2   72.79   18.80
  -7  -8  -2   76.89   15.50
  -8  15  -2   50.89   10.80
  -8  15  -2   42.50   26.50
  15  -7  -2   57.99    9.10
  -7  -8  -2   47.00   42.30
  15  -7  -2   38.00   15.90
 -15   7   2   58.29   16.40
   7   8   2   49.40   14.80
 -15   7   2   66.99   15.00
   8 -15   2   41.00   13.40
   7   8   2   78.19   13.50
   8 -15   2   69.29   11.50
   8 -15   2   71.69   15.40
   7   8   2   77.09   14.70
 -15   7   2   71.09   22.90
   8 -15   2   56.59   15.10
   8 -15   2   48.00   13.40
 -15   7   2   57.09   10.70
  -7  16  -2   27.30   11.00
  -7  16  -2   33.40   13.70
  -9  -7  -2   48.30   18.50
  -9  -7  -2   44.30   13.60
  -9  -7  -2   -3.80   25.30
  16  -9  -2   28.60   11.90
  -9  -7  -2   93.99   18.30
  16  -9  -2   40.50   16.40
  -9  -7  -2   24.10   14.30
  16  -9  -2   37.60    8.90
   7 -16   2   21.30   13.30
 -16   9   2   38.70   16.00
   7 -16   2  121.29   41.30
   9   7   2   26.60   12.80
 -16   9   2   29.00   25.20
 -16   9   2   33.60   15.60
 -16   9   2   16.60   14.10
 -16   9   2   41.00   13.30
   9   7   2   50.29   15.10
   9   7   2   34.10   11.40
   7 -16   2   29.20   16.70
   7 -16   2   29.10   14.70
   7 -16   2   23.00   15.10
   9   7   2   28.60   16.60
  13  -9  -2  116.19   14.10
  -9  -4  -2  115.19   14.10
  -4  13  -2   81.19   13.90
  13  -9  -2  130.09   23.50
  -4  13  -2  100.99   17.00
  -9  -4  -2  110.09   14.50
  -4  13  -2  120.99   12.50
  -9  -4  -2  125.59   24.80
  -9  -4  -2  101.19   13.80
  13  -9  -2  118.19   16.60
  13  -9  -2  132.59   15.70
  13  -9  -2  100.19   14.00
  -4  13  -2   76.59   12.20
  -9  -4  -2  131.39   15.80
   4 -13   2   76.69   14.40
   9   4   2  111.59   14.70
   9   4   2  116.79   16.60
 -13   9   2  143.99   18.30
   4 -13   2  104.99   26.80
   9   4   2  111.99   14.30
 -13   9   2  123.79   16.90
   4 -13   2  131.49   16.40
   9   4   2  125.29   17.20
   9   4   2  103.19   14.10
 -13   9   2  110.09   14.60
   9   4   2   67.29   26.00
   4 -13   2  111.19   14.80
 -13   9   2  112.29   15.60
   4 -13   2  158.38   18.90
  -9  -1  -2  143.09    8.10
  -1  10  -2  195.88   17.20
  10  -9  -2  146.29   14.80
  -1  10  -2  178.78   18.70
  10  -9  -2  163.08   14.50
  -1  10  -2  141.39   14.40
  10  -9  -2  162.88   17.80
  -1  10  -2  152.78   16.90
  -1  10  -2  169.78   15.20
  -9  -1  -2  127.79   14.30
  10  -9  -2  159.58   15.80
  10  -9  -2  157.68   22.40
  -9  -1  -2  157.88    9.10
  -1  10  -2  170.18   11.60
  -9  -1  -2  173.88   14.70
  -9  -1  -2  189.18   23.50
  -9  -1  -2  137.89   14.10
  10  -9  -2  132.59   14.40
  10  -9  -2  144.09   15.70
  -1  10  -2  134.99   17.20
  -9  -1  -2  165.08   22.90
   9   1   2  138.09   23.40
   1 -10   2  170.28   15.80
   1 -10   2  157.48   16.00
 -10   9   2  174.78   15.60
   9   1   2  173.38   16.30
   1 -10   2  155.78   16.00
   1 -10   2  152.28   14.00
   1 -10   2  138.39   15.20
   1 -10   2  139.89   15.60
   9   1   2  154.38   13.50
 -10   9   2  158.98   16.10
   1 -10   2  146.49   18.40
 -10   9   2  148.69   14.60
   9   1   2  162.78   14.80
 -10   9   2  180.28   16.80
 -10   9   2  151.08   14.30
   9   1   2  135.19   16.00
 -10   9   2  157.98   17.20
   9   1   2  142.59   13.80
   2   7  -2  120.89   15.30
   2   7  -2  135.29   13.00
  -9   2  -2  131.79   12.40
   2   7  -2  121.49   14.20
  -9   2  -2  152.38   21.10
   7  -9  -2  151.18   13.00
   7  -9  -2  121.99   11.70
  -9   2  -2  126.29   11.20
  -9   2  -2  130.89   12.00
  -9   2  -2  133.79   11.70
   7  -9  -2  136.19   12.80
   2   7  -2  129.59   12.20
   2   7  -2  132.09   11.50
  -9   2  -2  145.39    9.30
   2   7  -2  157.28   20.50
   7  -9  -2  145.19   19.00
   2   7  -2  111.69   13.00
   7  -9  -2  135.19   12.50
   7  -9  -2  113.99   14.50
   9  -2   2  147.19   14.20
   9  -2   2  176.08   22.50
  -2  -7   2  129.99   19.00
   9  -2   2  132.99   11.90
  -2  -7   2  126.29   12.80
   9  -2   2  139.19   13.30
   9  -2   2  133.49   11.70
  -7   9   2  114.59   11.70
  -2  -7   2  133.29   12.80
  -2  -7   2  142.09   11.60
   9  -2   2  111.49   11.40
  -2  -7   2  142.29   13.40
  -7   9   2  144.89   13.60
  -7   9   2  169.98   19.60
  -7   9   2  124.89   14.10
   9  -2   2  128.79   13.20
  -7   9   2  130.59   12.20
  -2  -7   2  113.99   13.60
  -2  -7   2  142.79   15.60
  -7   9   2  127.69   12.30
  -7   9   2  129.79   11.90
  -9   5  -2  142.39   10.60
   5   4  -2  116.79   19.40
   5   4  -2  134.89   12.40
   4  -9  -2  138.09   11.50
   4  -9  -2  130.59   11.20
   5   4  -2  120.39   13.10
   4  -9  -2  140.59   18.80
  -9   5  -2  158.38   12.20
  -9   5  -2  136.09   12.30
  -9   5  -2  138.99   11.20
   5   4  -2  128.79   15.10
   4  -9  -2  123.69   11.40
  -9   5  -2  165.48   12.60
   4  -9  -2  136.19   14.00
   4  -9  -2  146.49   11.40
  -9   5  -2  155.88   21.50
   5   4  -2  130.39   11.60
   4  -9  -2  129.69   11.30
   5   4  -2  130.99   11.10
   5   4  -2  137.89   11.60
   9  -5   2  148.29    9.60
  -5  -4   2  125.99   10.60
  -5  -4   2  135.89   12.50
  -4   9   2  146.79   13.40
   9  -5   2  121.99   12.00
   9  -5   2  114.09   11.00
  -4   9   2  126.79   11.90
   9  -5   2  135.79   14.40
   9  -5   2  131.39   11.40
  -5  -4   2  128.59   13.50
  -4   9   2  130.69   13.00
   9  -5   2  133.09   12.60
  -4   9   2  120.19   13.60
  -4   9   2  144.69   12.10
   9  -5   2  116.69   11.20
  -5  -4   2  152.88   14.70
  -4   9   2  133.89   11.50
  -4   9   2  131.69   11.10
  -5  -4   2  106.69   10.60
  -5  -4   2  125.69   12.50
  -4   9   2  157.98   19.50
   1  -9  -2   81.69   10.90
   1  -9  -2   87.29   10.10
   1  -9  -2   93.09   10.70
   8   1  -2  101.19    9.20
   1  -9  -2  107.19   16.30
   8   1  -2   87.19   10.60
  -9   8  -2   82.69    9.90
   8   1  -2   96.99   12.30
   8   1  -2   81.19   19.00
   8   1  -2  103.09   13.20
   1  -9  -2  100.09   11.30
  -9   8  -2   72.49   10.50
   8   1  -2  105.69   13.70
   1  -9  -2   95.89   17.20
  -9   8  -2   90.99   11.50
   1  -9  -2   99.29   12.40
   8   1  -2  103.19   11.30
  -9   8  -2   93.49   11.30
  -9   8  -2  103.79   11.80
   9  -8   2   93.89   10.30
  -1   9   2  110.49   12.40
  -1   9   2  111.99   12.20
   9  -8   2  113.49   12.60
  -8  -1   2   91.79   13.20
   9  -8   2   88.99   11.30
  -8  -1   2   85.89   12.10
   9  -8   2  100.89   12.10
  -1   9   2   98.59   10.80
  -1   9   2  107.69   17.30
  -1   9   2   98.79   13.00
  -1   9   2   87.29   10.10
  -8  -1   2   90.29    8.90
  -1   9   2  102.19   11.10
   9  -8   2   77.89   11.10
  -2  -9  -2   17.00    8.40
  -9  11  -2   19.30    7.40
  -2  -9  -2   27.00    7.20
  -2  -9  -2    8.60   12.60
  -9  11  -2   25.20    6.30
  11  -2  -2   18.30    9.50
  -2  -9  -2   18.50   13.90
  -9  11  -2   17.80    9.40
  -2  -9  -2   18.80    7.60
  -9  11  -2   16.80    9.60
  -2  -9  -2   27.80    8.60
  -9  11  -2   23.70    9.90
  -9  11  -2    5.70    5.70
  -2  -9  -2   17.50    5.10
  -2  -9  -2   19.50    7.60
  -9  11  -2   29.50    8.90
   2   9   2   34.00    9.40
 -11   2   2   34.50   10.20
   2   9   2    7.10   17.80
 -11   2   2    0.90   11.40
   2   9   2   39.00   11.20
 -11   2   2  -13.40    8.60
   9 -11   2    2.80   11.20
   2   9   2   20.50    4.50
   9 -11   2   29.90    8.70
   2   9   2   10.30    6.80
   9 -11   2   30.50    9.10
   9 -11   2   31.80    9.00
   9 -11   2   43.20   12.50
   2   9   2   20.20    7.10
   9 -11   2   27.30    7.70
   2   9   2   18.30    8.10
   9 -11   2   26.20    9.30
   2   9   2   13.80    6.90
  14  -5  -2   22.30   11.20
  14  -5  -2   15.80    6.30
  14  -5  -2   35.60   14.00
  -5  -9  -2   30.90   15.80
  -9  14  -2   18.80   12.70
  -5  -9  -2   17.70   19.10
  -5  -9  -2   21.30    9.40
  -9  14  -2   12.60   13.40
  14  -5  -2   22.20   11.90
  -5  -9  -2   38.00   12.90
  -9  14  -2   22.70    8.30
  -9  14  -2   -1.60    8.40
  -5  -9  -2   19.50   10.40
 -14   5   2    7.40   10.90
   9 -14   2   24.60   12.00
   5   9   2   43.50   13.80
 -14   5   2    7.70   13.50
   9 -14   2   18.90    9.50
   9 -14   2   19.50    8.90
   9 -14   2   -4.20   10.40
 -14   5   2   25.10   12.00
   9 -14   2   -8.80   10.30
   5   9   2   24.30    9.90
 -14   5   2   29.80   17.80
   5   9   2   31.90   24.60
   5   9   2   21.90    8.50
   5   9   2   20.30   10.60
 -14   5   2   10.10    7.60
  -8  -9  -2   65.69   23.40
  17  -8  -2   21.10   14.20
  17  -8  -2    7.10   15.60
  -8  -9  -2  -12.30   26.40
  17  -8  -2   15.20    8.80
  -9  17  -2   14.50   12.00
  -8  -9  -2  -34.60   19.30
  -8  -9  -2   18.20   14.00
  -9  17  -2   33.80   19.80
  -9  17  -2   15.00   12.30
  -8  -9  -2   33.20   17.40
   9 -17   2   -7.30   14.00
 -17   8   2   -6.70   14.40
   8   9   2    7.00   13.70
   9 -17   2   11.90   14.50
 -17   8   2   34.90   27.90
 -17   8   2   -5.20   15.70
   9 -17   2   16.90   15.20
   8   9   2   30.00   19.20
   8   9   2    7.10   12.10
  18 -10  -2   57.69   12.00
 -10  -8  -2   54.39   24.50
  18 -10  -2   51.19   20.00
  18 -10  -2   17.90   16.60
 -10  -8  -2   57.79   34.70
  -8  18  -2   48.60   16.40
   8 -18   2   46.40   17.60
  10   8   2   23.80   21.80
 -18  10   2    4.40   36.60
   8 -18   2   46.90   19.40
  10   8   2   65.49   15.10
 -18  10   2   81.49   21.10
   8 -18   2   39.30   19.20
  10   8   2   56.09   18.30
 -18  10   2   68.39   20.10
 -10  -5  -2   49.99   13.20
  -5  15  -2   58.19   18.20
 -10  -5  -2   65.59   16.30
 -10  -5  -2   59.69   14.20
  -5  15  -2   81.79   15.60
  15 -10  -2   49.60   14.00
 -10  -5  -2   68.19   19.00
  -5  15  -2   63.79   11.00
  15 -10  -2   27.60   21.70
 -10  -5  -2   79.69   25.40
  -5  15  -2   85.49   20.00
  15 -10  -2   51.39   12.50
   5 -15   2   70.39   33.30
  10   5   2   77.59   18.00
  10   5   2   62.99   16.30
 -15  10   2   76.89   17.20
 -15  10   2   72.79   14.80
 -15  10   2   62.19   17.10
  10   5   2   59.79   14.50
  10   5   2   60.79   13.10
   5 -15   2   56.99   15.30
   5 -15   2  116.49   18.20
 -15  10   2   73.49   14.90
   5 -15   2   68.19   15.00
  -2  12  -2  207.28   19.60
 -10  -2  -2  194.08   18.60
  -2  12  -2  208.28   14.90
 -10  -2  -2  182.08   13.70
 -10  -2  -2  181.78   18.50
  -2  12  -2  183.38   21.60
  12 -10  -2  192.88   23.60
  12 -10  -2  193.48   19.90
 -10  -2  -2  189.08   27.20
  12 -10  -2  262.37   30.80
  -2  12  -2  196.78   21.60
 -10  -2  -2  202.38   25.60
  12 -10  -2  189.98   18.20
  12 -10  -2  197.78   19.70
  -2  12  -2  151.38   19.80
 -10  -2  -2  165.68   17.50
  -2  12  -2  201.88   18.40
  -2  12  -2  198.38   21.30
 -10  -2  -2  226.28   18.30
  12 -10  -2  189.98   17.60
  10   2   2  209.88   17.30
   2 -12   2  195.08   20.10
  10   2   2  185.38   21.30
   2 -12   2  206.48   20.40
   2 -12   2  209.48   20.70
  10   2   2  200.28   18.10
   2 -12   2  148.79   27.10
   2 -12   2  195.98   19.90
 -12  10   2  201.28   18.30
  10   2   2  161.38   19.60
 -12  10   2  205.28   21.20
  10   2   2  210.88   18.20
 -12  10   2  202.08   18.80
   2 -12   2  192.18   17.70
 -12  10   2  187.98   19.70
  10   2   2  147.69   27.40
   1   9  -2  135.09   17.60
   1   9  -2  154.88   14.80
   1   9  -2  166.38   14.50
 -10   1  -2  149.49   23.30
 -10   1  -2  168.08   15.10
 -10   1  -2  129.69   12.90
 -10   1  -2  160.08   14.80
 -10   1  -2  145.89    9.90
 -10   1  -2  168.68   20.90
   1   9  -2  154.38   11.10
   1   9  -2  166.38   16.80
   9 -10  -2  164.38   18.50
   9 -10  -2  149.59   15.50
   9 -10  -2  163.18   15.40
   9 -10  -2  136.39   14.10
   9 -10  -2  167.38   15.40
   9 -10  -2  188.58   16.60
 -10   1  -2  144.29   14.30
   1   9  -2  133.89   16.20
   9 -10  -2  168.78   22.90
   1   9  -2  144.69   17.60
  10  -1   2  153.88   13.50
  -1  -9   2  140.19   15.90
  10  -1   2  138.59   16.70
  10  -1   2  202.68   26.20
  -9  10   2  170.98   17.50
  10  -1   2  184.28   14.90
  -1  -9   2  145.09   21.30
  -1  -9   2  162.48   17.70
  -9  10   2  116.99   15.70
  10  -1   2  163.98   18.20
  -9  10   2  155.58   15.40
  10  -1   2  148.09   13.90
  -1  -9   2  149.29   13.00
  -9  10   2  217.98   25.50
  -9  10   2  174.18   15.50
  -1  -9   2  139.09   15.80
  -1  -9   2  154.28   18.60
  -9  10   2  142.09   13.70
  10  -1   2  149.99   16.20
  -1  -9   2  139.09   16.20
  -9  10   2  131.99   14.50
  -1  -9   2  148.79   15.60
   6 -10  -2  294.77   19.10
   4   6  -2  284.47   22.00
   4   6  -2  292.07   19.70
   4   6  -2  288.47   20.60
 -10   4  -2  307.87   19.00
   4   6  -2  283.37   20.00
 -10   4  -2  277.07   17.60
 -10   4  -2  300.57   19.10
   4   6  -2  282.97   19.20
 -10   4  -2  304.87   30.00
 -10   4  -2  290.37   18.50
 -10   4  -2  305.37   19.40
   6 -10  -2  289.77   26.10
   4   6  -2  292.07   28.50
   6 -10  -2  302.97   18.70
   4   6  -2  274.17   19.30
   6 -10  -2  289.77   19.10
   6 -10  -2  296.87   19.30
   6 -10  -2  274.47   18.50
   6 -10  -2  286.87   20.50
  -6  10   2  279.67   26.30
  -4  -6   2  305.87   20.10
  -6  10   2  270.57   21.10
  -4  -6   2  280.47   18.10
  -6  10   2  281.27   19.60
  -4  -6   2  290.87   21.80
  10  -4   2  263.77   21.00
  -6  10   2  276.07   19.90
  -6  10   2  276.77   18.10
  10  -4   2  281.87   20.30
  -4  -6   2  288.77   20.50
  -4  -6   2  298.77   19.70
  -4  -6   2  304.37   18.10
  10  -4   2  311.17   18.90
  10  -4   2  279.97   20.30
  -6  10   2  322.37   19.10
  -6  10   2  283.37   18.70
  -6  10   2  290.37   20.50
  10  -4   2  300.97   18.90
   3 -10  -2   58.99   10.10
   7   3  -2   55.49   17.80
 -10   7  -2   49.90    9.00
   7   3  -2   48.70    7.70
   3 -10  -2   57.59    9.20
   3 -10  -2   60.49    9.10
   3 -10  -2   64.19    9.70
   3 -10  -2   43.10   13.70
   7   3  -2   57.09    9.90
 -10   7  -2   87.69    9.60
   7   3  -2   57.49    8.20
   3 -10  -2   53.59   14.10
 -10   7  -2   45.90    8.70
 -10   7  -2   59.09    8.90
   7   3  -2   52.99    8.90
   3 -10  -2   52.79   10.70
 -10   7  -2   59.49   16.40
   3 -10  -2   54.89    8.70
   7   3  -2   60.19   10.70
   7   3  -2   52.49    8.50
 -10   7  -2   53.79    8.80
   7   3  -2   61.59   12.20
  10  -7   2   73.69   10.50
  10  -7   2   62.09    9.60
  -3  10   2   36.10   14.20
  -7  -3   2   53.69   11.40
  -3  10   2   73.89   11.50
  -3  10   2   49.00    9.30
  -7  -3   2   49.70    7.60
  -7  -3   2   34.50    8.00
  -7  -3   2   49.20    7.70
  -7  -3   2   55.99    9.90
  10  -7   2   59.19   10.50
  -3  10   2   49.30   10.00
  10  -7   2   61.29   10.00
  -3  10   2   72.19    9.60
  -3  10   2   65.09    9.20
  10  -7   2   42.10   10.70
  -7  -3   2   59.39    9.70
  10  -7   2   47.30    8.10
  -3  10   2   46.00    7.30
  -3  10   2   37.70    7.10
  10   0  -2  135.09   15.70
  10   0  -2   87.19   14.10
   0 -10  -2   98.39   13.00
 -10  10  -2  120.89   15.30
   0 -10  -2  157.78   16.20
   0 -10  -2  108.29   13.40
  10   0  -2  108.99   15.10
  10   0  -2  127.69   10.90
  10   0  -2   97.09   12.70
   0 -10  -2  143.49   21.90
 -10  10  -2  114.69   13.80
   0 -10  -2  117.69   14.30
 -10  10  -2  139.19   13.40
 -10  10  -2  132.59   15.70
   0 -10  -2  149.09   21.00
  10   0  -2  151.28   26.20
 -10  10  -2  117.09   14.30
 -10  10  -2  109.59   12.90
   0 -10  -2  102.69   11.30
  10   0  -2  117.09   14.00
   0 -10  -2  130.29   13.50
   0  10   2  126.19   15.80
   0  10   2  133.99   16.80
  10 -10   2   92.49   13.20
   0  10   2  131.59   14.60
  10 -10   2  109.89   15.20
   0  10   2  124.99   13.20
   0  10   2  132.69   12.70
   0  10   2  109.19   14.40
  10 -10   2  101.39   13.50
   0  10   2  114.19   10.30
 -10   0   2  125.39   18.50
 -10   0   2  107.79   13.10
  10 -10   2  162.68   21.70
 -10   0   2  110.99   14.80
   0  10   2  125.49   21.20
 -10   0   2   84.69   12.90
  10 -10   2  136.89   14.70
 -10   0   2  117.09   14.00
  10 -10   2   88.19   11.70
  -3 -10  -2   32.20   16.20
  13  -3  -2   14.50   12.50
 -10  13  -2   11.00    6.60
 -10  13  -2   -6.60   11.40
  -3 -10  -2    4.30   18.20
 -10  13  -2    5.30   10.60
  -3 -10  -2   14.70    9.20
 -10  13  -2   12.70    7.80
  13  -3  -2   10.80    8.20
  13  -3  -2    9.60    5.80
  -3 -10  -2    6.70   10.90
  13  -3  -2   -2.80   10.50
  -3 -10  -2   29.00    9.30
 -10  13  -2    7.80    9.50
  13  -3  -2   12.10   10.40
 -10  13  -2   -1.20    7.70
   3  10   2   10.70   11.20
   3  10   2   18.50   10.30
 -13   3   2   -3.00   13.30
   3  10   2    1.10    7.20
  10 -13   2   -0.50    9.20
  10 -13   2   -4.20    9.70
   3  10   2   19.60   12.70
 -13   3   2   14.30    9.00
   3  10   2    1.60    4.60
   3  10   2   12.80    9.10
 -13   3   2   28.60   11.70
 -13   3   2   16.50   10.90
  10 -13   2   17.30   10.60
  10 -13   2   14.10    9.20
   3  10   2   -1.40   24.90
 -13   3   2   35.50   15.00
  10 -13   2   20.90    8.20
   3  10   2    1.80    9.40
  -6 -10  -2    1.60   17.60
  -6 -10  -2   24.10   14.00
  16  -6  -2    8.80    8.10
  16  -6  -2   38.50   16.50
 -10  16  -2    2.40   10.60
  -6 -10  -2    6.90   25.30
 -10  16  -2   16.70   17.30
  -6 -10  -2   20.70   12.70
  -6 -10  -2  -10.10   21.00
 -10  16  -2   33.00   13.00
  16  -6  -2   27.60   12.70
   6  10   2   -9.10   14.70
 -16   6   2   35.60   14.80
 -16   6   2   22.30   14.30
  10 -16   2   24.10   14.70
  10 -16   2    3.00   13.90
 -16   6   2   18.60   21.90
   6  10   2   31.80   14.70
   6  10   2    5.10   10.00
  10 -16   2   14.10   17.60
  10 -16   2   13.90   12.80
 -16   6   2    6.60   17.00
 -11  -6  -2  846.52   50.49
  -6  17  -2  958.60   53.19
  17 -11  -2  865.01   55.19
  -6  17  -2  827.82   46.20
 -11  -6  -2  862.81   51.59
  -6  17  -2  908.11   58.49
  17 -11  -2  867.51   63.19
 -11  -6  -2  782.32   67.09
  17 -11  -2  864.51   51.89
  11   6   2  763.32   49.20
 -17  11   2  892.91   54.79
   6 -17   2  875.01   54.79
  11   6   2  811.22   55.69
 -17  11   2  925.71   55.49
 -17  11   2  921.31   52.69
   6 -17   2  860.91   51.09
  11   6   2  904.41   56.79
  11   6   2  879.31   50.19
   6 -17   2  860.11   52.99
  14 -11  -2   -4.10    9.20
  -3  14  -2   10.20    7.70
  -3  14  -2  -18.70   13.30
 -11  -3  -2   -1.50   12.50
  14 -11  -2  -18.70   18.90
 -11  -3  -2   12.10   10.30
 -11  -3  -2   27.10    8.70
  -3  14  -2    4.90   13.20
  14 -11  -2    2.60   11.50
  14 -11  -2   -3.10   11.50
  -3  14  -2   12.60   11.00
   3 -14   2   19.60   10.00
  11   3   2    1.50   12.40
 -14  11   2   10.30   12.00
  11   3   2   28.60   27.60
   3 -14   2   21.00   12.70
  11   3   2   24.70   10.10
  11   3   2    1.20    8.90
 -14  11   2   10.80    8.60
   3 -14   2  -12.70   25.00
   3 -14   2   -2.60   10.20
 -14  11   2   10.60   17.60
  11   3   2  -14.40    9.10
   3 -14   2   18.40   12.60
  11 -11  -2 1789.92   89.99
  11 -11  -2 1793.92   86.49
 -11   0  -2 1971.70   87.39
   0  11  -2 1777.92   91.09
  11 -11  -2 1936.21   97.89
  11 -11  -2 1799.02   87.79
   0  11  -2 1873.11   89.89
 -11   0  -2 1873.51   87.09
   0  11  -2 1880.01   86.99
   0  11  -2 1977.00   88.79
 -11   0  -2 1868.51   87.19
 -11   0  -2 1928.01   96.99
 -11   0  -2 1851.71   81.69
   0  11  -2 1940.51   90.19
 -11   0  -2 2003.40   98.19
  11 -11  -2 1841.52   88.69
   0  11  -2 1860.31   84.39
   0  11  -2 1861.21   91.69
  11 -11  -2 1941.91   88.59
  11   0   2 1856.71   89.39
   0 -11   2 1892.51   86.49
 -11  11   2 1854.61   88.79
 -11  11   2 1866.61   87.79
  11   0   2 1766.42   88.59
 -11  11   2 1932.11   88.79
 -11  11   2 1889.41   88.49
 -11  11   2 1967.60   91.09
   0 -11   2 1975.30   88.89
  11   0   2 1912.71   87.69
   0 -11   2 1795.82   88.19
  11   0   2 1898.41   98.39
   0 -11   2 2032.90   90.19
  11   0   2 1940.71   87.39
   0 -11   2 1921.91   90.79
   0 -11   2 1953.30   89.49
  11   0   2 1896.61   87.29
 -11   3  -2   33.90    8.60
   8 -11  -2   37.70    8.90
   8 -11  -2   36.50    8.30
   3   8  -2   31.90    7.70
   3   8  -2   34.30    9.80
   8 -11  -2   21.50    8.10
 -11   3  -2   15.90    7.60
   8 -11  -2   23.60   10.50
   3   8  -2   33.30   11.30
 -11   3  -2   32.40    7.40
 -11   3  -2   26.00    7.30
   8 -11  -2   23.00    7.70
 -11   3  -2   19.10    7.30
   8 -11  -2   44.90   16.00
 -11   3  -2   35.50   16.20
   8 -11  -2   26.20    8.50
   3   8  -2   18.70    9.40
  -3  -8   2   28.50    8.30
  11  -3   2   30.70    7.60
  -8  11   2   30.30    8.70
  -8  11   2   22.40   13.50
  -8  11   2   34.70    8.70
  -3  -8   2    1.20    9.30
  -3  -8   2   42.00    9.40
  11  -3   2   29.10    9.40
  -8  11   2   41.00    9.60
  -8  11   2   16.00    9.50
  -3  -8   2   24.20    6.50
  -3  -8   2   24.20   11.50
  11  -3   2   31.60   10.80
  11  -3   2   27.40    7.40
  -8  11   2   17.60    9.40
  11  -3   2   15.60    8.40
  -3  -8   2   29.50    8.60
  -3  -8   2   49.90   10.60
  -8  11   2    9.70    6.60
  -3  -8   2   35.40   12.80
  11  -3   2   42.80    8.40
   6   5  -2 1734.33   81.79
   5 -11  -2 1875.01   82.59
   5 -11  -2 1713.23   81.89
   6   5  -2 1739.23   83.79
 -11   6  -2 1892.01   94.49
   5 -11  -2 1891.51   82.49
   5 -11  -2 1855.51   82.29
   5 -11  -2 1908.71   84.29
   5 -11  -2 1862.51   82.89
 -11   6  -2 1777.72   80.59
   6   5  -2 1718.83   92.39
   6   5  -2 1754.42   83.09
 -11   6  -2 1878.01   83.19
 -11   6  -2 1810.62   82.39
   6   5  -2 1821.82   85.69
   6   5  -2 1795.52   82.59
   6   5  -2 1808.22   82.99
   5 -11  -2 1825.72   90.89
 -11   6  -2 1803.92   82.69
 -11   6  -2 1767.12   85.19
  -6  -5   2 1754.92   83.09
  -5  11   2 1736.93   84.19
  -6  -5   2 1866.81   84.19
  11  -6   2 1907.91   83.09
  -5  11   2 1743.93   82.39
  11  -6   2 1797.42   83.89
  -6  -5   2 1825.42   80.89
  -5  11   2 1843.82   81.59
  11  -6   2 1829.02   84.89
  -5  11   2 1832.72   83.39
  11  -6   2 1705.73   82.29
  -6  -5   2 1798.22   83.99
  11  -6   2 1779.72   82.39
  11  -6   2 1753.12   78.39
  -6  -5   2 1694.63   81.39
  -5  11   2 1742.93   89.29
  -5  11   2 1830.82   82.59
  -5  11   2 1809.52   83.09
  -6  -5   2 1776.52   84.99
  -5  11   2 1708.43   84.69
   2 -11  -2   23.20   14.00
 -11   9  -2   12.40   16.80
   9   2  -2   25.50    6.90
   9   2  -2   17.60    6.60
   9   2  -2   15.50    9.90
   9   2  -2   15.50    9.70
 -11   9  -2   18.40    9.10
   2 -11  -2    9.90    6.70
   9   2  -2   17.40    8.20
   9   2  -2   16.90    8.10
   9   2  -2    6.80   18.60
 -11   9  -2   33.90    9.60
   2 -11  -2   21.90    7.70
   2 -11  -2   23.80    8.60
   2 -11  -2   35.40   14.50
 -11   9  -2   14.70    8.70
 -11   9  -2   20.90    8.20
 -11   9  -2   19.80    6.50
   2 -11  -2    4.60    6.90
   2 -11  -2   17.10    9.40
 -11   9  -2    8.70    7.20
  11  -9   2   25.40    9.70
  -2  11   2   25.30    7.20
  11  -9   2   21.30    7.80
  -9  -2   2   -3.70   10.20
  11  -9   2   18.90    8.60
  -9  -2   2   30.70    8.30
  11  -9   2   37.20    9.30
  -2  11   2   18.90    6.90
  -9  -2   2   26.90    8.60
  11  -9   2   30.90    8.90
  -9  -2   2   17.50    6.40
  -2  11   2   27.50   10.20
  -2  11   2   21.80    8.90
  -2  11   2   25.60    8.10
  -9  -2   2   10.40    7.70
  -2  11   2   16.70    6.80
  -2  11   2   21.00    9.50
  -2  11   2    7.30   16.10
  -9  -2   2   19.80    6.80
  12  -1  -2  707.53   35.60
  12  -1  -2  642.54   39.50
  -1 -11  -2  748.63   48.50
  12  -1  -2  768.72   57.79
  12  -1  -2  747.53   39.60
  12  -1  -2  763.22   43.00
  12  -1  -2  603.54   37.90
  -1 -11  -2  680.33   39.10
 -11  12  -2  651.13   40.40
 -11  12  -2  693.23   36.70
 -11  12  -2  647.54   39.70
 -11  12  -2  706.33   41.80
 -11  12  -2  742.53   39.20
  -1 -11  -2  781.62   51.79
  -1 -11  -2  653.13   39.40
  -1 -11  -2  741.43   35.70
 -11  12  -2  706.13   38.80
  -1 -11  -2  720.63   37.80
  11 -12   2  713.03   40.70
 -12   1   2  733.73   39.80
   1  11   2  689.53   34.30
   1  11   2  684.83   38.00
  11 -12   2  626.94   40.30
   1  11   2  684.13   40.60
   1  11   2  674.73   41.80
  11 -12   2  637.34   37.20
  11 -12   2  735.63   40.20
   1  11   2  714.53   38.50
 -12   1   2  683.53   43.90
 -12   1   2  722.83   40.80
   1  11   2  635.74   39.90
 -12   1   2  697.13   39.50
  11 -12   2  719.83   40.40
   1  11   2  666.73   39.50
 -12   1   2  716.43   40.40
 -11  15  -2    0.60   10.40
  15  -4  -2   17.30    7.80
 -11  15  -2   14.90   11.00
  15  -4  -2   -5.70   10.10
  15  -4  -2   12.90   15.50
  -4 -11  -2   10.50   15.10
  -4 -11  -2   -3.50   10.90
  -4 -11  -2   -2.60   15.00
  -4 -11  -2   16.30   20.80
 -11  15  -2   18.80   15.50
   4  11   2   16.50   11.70
 -15   4   2    2.10   12.80
  11 -15   2   -6.10   14.20
 -15   4   2   -1.00   15.30
  11 -15   2   19.20   12.90
  11 -15   2    2.70   11.80
 -15   4   2   18.10   11.50
 -15   4   2  -12.30   18.10
   4  11   2    5.20   13.00
 -15   4   2   -5.40   14.30
  11 -15   2   17.00   13.60
   4  11   2   16.90   10.40
  -7 -11  -2  164.68   40.20
  18  -7  -2  230.68   27.60
  18  -7  -2   98.99   23.10
  18  -7  -2  171.68   20.50
 -11  18  -2  162.68   20.90
 -11  18  -2  108.59   26.90
  -7 -11  -2  223.88   38.10
 -11  18  -2  107.79   19.90
 -18   7   2  200.88   27.30
   7  11   2  160.88   20.70
   7  11   2  150.08   20.40
   7  11   2  148.49   27.70
  11 -18   2  149.99   23.80
   7  11   2  128.29   24.40
  11 -18   2  203.18   26.80
 -18   7   2  146.29   35.80
  11 -18   2  115.09   22.50
 -18   7   2  178.58   27.70
  -4  16  -2   49.10   18.40
  -4  16  -2   62.29   12.20
 -12  -4  -2   26.50   14.60
  16 -12  -2   73.59   27.10
 -12  -4  -2   78.49   15.70
  16 -12  -2   19.20   12.00
 -12  -4  -2   91.09   30.30
  -4  16  -2   67.89   16.60
  16 -12  -2   43.10   18.10
 -12  -4  -2   41.90   18.40
  16 -12  -2   67.79   17.20
 -16  12   2   66.59   17.40
   4 -16   2   32.30   34.10
   4 -16   2   20.70   15.00
  12   4   2   42.20   18.20
   4 -16   2   39.90   14.80
  12   4   2   58.79   13.40
  12   4   2   61.29   15.70
 -16  12   2   33.40   17.80
   4 -16   2   20.60   15.40
 -16  12   2   86.69   20.30
  -1  13  -2   36.80   14.20
  -1  13  -2   66.19   16.00
  -1  13  -2   41.90   12.90
 -12  -1  -2   51.09   11.50
  -1  13  -2   15.40   15.30
 -12  -1  -2   48.50   20.30
  -1  13  -2   46.60    9.20
 -12  -1  -2   41.20    4.80
 -12  -1  -2   41.00    4.50
  13 -12  -2   49.70   21.00
  13 -12  -2   30.20   11.80
 -12  -1  -2   38.90   12.80
 -12  -1  -2   51.79   13.20
 -12  -1  -2   81.09   25.00
  -1  13  -2   41.80   20.20
  13 -12  -2   56.49   12.60
  13 -12  -2   53.29   13.70
  12   1   2   42.60   11.20
 -13  12   2   49.99   11.00
 -13  12   2   63.29   13.40
  12   1   2   66.79   26.50
  12   1   2   48.30   11.30
  12   1   2   26.80   11.20
   1 -13   2   64.49   15.80
  12   1   2   45.40   13.50
   1 -13   2   37.80   10.90
   1 -13   2   62.99   21.20
 -13  12   2   20.10   10.50
 -13  12   2   38.20   15.40
   1 -13   2   61.99   14.70
   1 -13   2   47.40   12.20
   1 -13   2   40.00   10.50
  10 -12  -2  264.07   29.50
  10 -12  -2  203.48   21.10
 -12   2  -2  210.48   29.00
   2  10  -2  215.28   21.50
  10 -12  -2  189.08   18.70
   2  10  -2  176.68   14.40
 -12   2  -2  198.08   19.00
  10 -12  -2  227.98   24.20
  10 -12  -2  206.38   19.60
   2  10  -2  204.48   20.90
   2  10  -2  249.88   19.90
 -12   2  -2  201.38   13.80
 -12   2  -2  211.28   19.90
  10 -12  -2  231.18   19.30
   2  10  -2  171.88   22.70
   2  10  -2  198.38   23.10
 -12   2  -2  202.48   20.30
 -12   2  -2  193.48   19.00
   2  10  -2  198.88   17.70
  -2 -10   2  212.98   20.80
 -10  12   2  176.48   19.80
 -10  12   2  206.48   18.40
  -2 -10   2  202.78   24.20
 -10  12   2  202.98   22.20
  12  -2   2  207.18   20.70
 -10  12   2  139.69   24.60
  -2 -10   2  200.78   20.20
  12  -2   2  179.08   18.30
 -10  12   2  213.78   18.20
  12  -2   2  182.58   17.60
  -2 -10   2  189.28   16.60
  -2 -10   2  200.18   26.30
  12  -2   2  207.68   22.80
 -10  12   2  207.48   20.90
  -2 -10   2  187.38   20.30
  -2 -10   2  169.68   18.70
  12  -2   2  191.58   17.30
   5   7  -2  205.28   19.30
   7 -12  -2  208.88   18.00
   5   7  -2  209.98   18.90
   7 -12  -2  198.58   17.30
 -12   5  -2  198.98   17.80
   7 -12  -2  186.78   17.60
 -12   5  -2  165.08   14.90
   7 -12  -2  194.08   25.30
 -12   5  -2  215.68   18.20
   7 -12  -2  177.48   20.70
   5   7  -2  192.58   19.50
   7 -12  -2  181.48   17.90
   5   7  -2  196.78   21.40
 -12   5  -2  204.28   18.50
 -12   5  -2  182.78   19.90
   7 -12  -2  209.48   18.80
   5   7  -2  221.58   28.30
   5   7  -2  173.58   19.90
 -12   5  -2  161.38   27.80
   5   7  -2  233.38   18.50
  -7  12   2  200.28   19.40
  -7  12   2  198.58   20.60
  -7  12   2  183.98   17.20
  -5  -7   2  187.18   16.20
  -7  12   2  204.48   25.80
  -7  12   2  204.88   18.30
  -7  12   2  184.68   16.90
  12  -5   2  215.88   19.30
  12  -5   2  230.78   22.30
  12  -5   2  210.88   17.50
  12  -5   2  168.08   18.10
  -5  -7   2  184.08   18.90
  -5  -7   2  188.48   15.10
  12  -5   2  201.98   16.60
  -5  -7   2  209.18   18.60
  -7  12   2  169.78   16.20
  -5  -7   2  168.98   18.40
   8   4  -2  152.78   17.60
   4 -12  -2  136.99   15.00
   8   4  -2  117.59   14.30
   4 -12  -2  230.28   26.50
   8   4  -2  140.59   26.50
   8   4  -2  129.69   15.90
   4 -12  -2  136.09   14.90
   8   4  -2  138.89   15.30
   8   4  -2  113.29   16.30
   4 -12  -2  142.79   18.20
 -12   8  -2  166.08   17.50
   4 -12  -2  159.28   16.60
 -12   8  -2  134.49   14.00
   8   4  -2  106.99   17.30
 -12   8  -2  157.38   17.10
   4 -12  -2  124.49   15.70
 -12   8  -2  106.29   13.80
   8   4  -2  169.08   15.90
 -12   8  -2  169.48   14.80
 -12   8  -2  123.69   25.20
   4 -12  -2  147.09   16.00
  -4  12   2  145.99   14.90
  12  -8   2  114.79   17.20
  -8  -4   2  176.58   17.00
  -4  12   2  154.08   15.00
  12  -8   2  134.29   17.30
  -8  -4   2  151.68   16.90
  -4  12   2  154.38   18.40
  12  -8   2  129.89   15.30
  12  -8   2  128.89   15.00
  -8  -4   2  134.09   13.90
  -4  12   2  141.19   16.10
  -8  -4   2  131.69   13.10
  -4  12   2  145.39   18.80
  12  -8   2  138.29   16.00
  -4  12   2  132.69   17.80
  -4  12   2  135.09   14.10
  12  -8   2  147.79   15.10
  -8  -4   2  188.58   18.50
  -4  12   2  123.89   21.20
 -12  11  -2  676.93   39.00
 -12  11  -2  725.93   40.20
  11   1  -2  719.03   39.00
  11   1  -2  667.83   53.59
   1 -12  -2  567.44   38.10
  11   1  -2  655.73   35.60
   1 -12  -2  751.62   49.00
  11   1  -2  696.83   42.20
   1 -12  -2  715.23   49.30
  11   1  -2  590.54   37.40
 -12  11  -2  708.23   39.00
 -12  11  -2  731.33   40.60
   1 -12  -2  695.63   37.30
 -12  11  -2  679.63   38.10
 -12  11  -2  729.03   38.30
   1 -12  -2  665.83   39.40
   1 -12  -2  692.43   38.70
 -11  -1   2  651.63   40.10
  12 -11   2  690.83   39.60
  -1  12   2  682.03   37.30
  12 -11   2  747.63   42.30
  -1  12   2  764.32   42.40
  -1  12   2  686.33   40.50
 -11  -1   2  590.04   44.80
  -1  12   2  698.63   39.30
  12 -11   2  676.33   37.80
  -1  12   2  625.94   34.30
  -1  12   2  667.23   40.00
  -1  12   2  718.73   38.10
  12 -11   2  666.63   39.70
  -1  12   2  685.73   48.50
 -11  -1   2  672.73   39.20
  12 -11   2  684.23   38.90
  12 -11   2  694.83   40.50
 -12  14  -2   75.79   17.80
  -2 -12  -2   23.00   15.30
  -2 -12  -2   77.39   23.00
  -2 -12  -2   62.09   13.00
  14  -2  -2   42.40    9.40
  14  -2  -2   43.50   12.40
  14  -2  -2   57.29   16.50
  -2 -12  -2   45.30   24.70
 -12  14  -2   40.80   12.80
  14  -2  -2   28.80   29.20
  14  -2  -2   72.69   20.10
 -12  14  -2   37.90   11.50
  -2 -12  -2   49.90   23.10
 -12  14  -2   58.39   13.30
   2  12   2   52.29   16.50
   2  12   2   18.30   17.10
 -14   2   2   36.70   16.40
 -14   2   2   41.80   14.10
 -14   2   2   37.80   15.80
  12 -14   2   52.19   13.30
   2  12   2   20.30   12.70
   2  12   2   64.89   15.70
   2  12   2   52.59    8.40
  12 -14   2   62.19   15.50
 -14   2   2   64.59   18.30
  12 -14   2   33.70   13.80
 -14   2   2   53.09   12.20
  12 -14   2   39.60   13.80
  17  -5  -2  622.44   48.40
 -12  17  -2  687.03   44.10
  -5 -12  -2  624.34   42.10
 -12  17  -2  645.64   49.90
  17  -5  -2  630.24   36.80
  17  -5  -2  632.44   44.50
  -5 -12  -2  620.94   59.19
  -5 -12  -2  710.23   62.79
 -12  17  -2  616.94   42.00
  17  -5  -2  759.92   71.79
  12 -17   2  641.24   45.90
   5  12   2  733.13   41.90
   5  12   2  678.53   44.50
 -17   5   2  704.83   45.70
   5  12   2  605.14   41.90
  12 -17   2  674.93   47.40
 -17   5   2  684.63   55.09
  12 -17   2  652.63   44.20
   5  12   2  629.94   50.09
 -17   5   2  680.83   48.40
  18 -13  -2   21.00   16.00
  18 -13  -2   67.49   21.90
 -18  13   2   36.90   15.80
 -18  13   2   66.09   23.10
   5 -18   2   56.99   21.20
  13   5   2   50.49   15.60
   5 -18   2   30.90   20.90
  -2  15  -2   23.20   18.70
  15 -13  -2   95.89   17.70
  -2  15  -2   62.99   11.80
  15 -13  -2   59.19   16.60
  15 -13  -2   65.99   28.00
 -13  -2  -2   95.39   18.50
 -13  -2  -2   61.09   15.00
  -2  15  -2   84.49   20.50
 -13  -2  -2   37.20   28.60
 -13  -2  -2  101.79   17.20
  15 -13  -2   54.29   17.10
  -2  15  -2   69.09   16.00
   2 -15   2   69.79   16.90
  13   2   2   62.49   14.70
 -15  13   2   83.79   18.70
   2 -15   2  102.39   19.70
   2 -15   2   22.40   26.00
 -15  13   2   48.20   15.90
  13   2   2   86.49   18.30
  13   2   2   54.29   13.40
 -15  13   2   60.39   18.90
  13   2   2   11.10   20.40
 -15  13   2   56.59   16.50
   2 -15   2   85.19   17.80
   2 -15   2   69.59   14.60
  12 -13  -2   51.09   13.00
   1  12  -2   31.50    8.30
   1  12  -2   39.10   14.50
 -13   1  -2   28.60   13.10
  12 -13  -2   26.40   12.40
  12 -13  -2   49.60   17.10
   1  12  -2   67.29   15.90
   1  12  -2   39.40   11.00
 -13   1  -2   52.99   13.00
  12 -13  -2   41.20   11.30
   1  12  -2   36.80   11.40
  12 -13  -2   41.60   23.00
 -13   1  -2   35.60   20.80
   1  12  -2   49.50   15.00
 -13   1  -2   40.70    7.30
 -13   1  -2   44.20   12.00
 -13   1  -2   44.40   21.90
 -12  13   2   41.50   13.30
 -12  13   2   42.80   14.00
  13  -1   2   44.00   12.70
 -12  13   2   38.90   10.50
  13  -1   2   36.60   10.30
 -12  13   2    3.00   23.40
  -1 -12   2   40.50   13.20
 -12  13   2   33.20   12.30
  -1 -12   2   71.69   15.50
  -1 -12   2   49.99   11.00
  -1 -12   2   60.19   14.60
  13  -1   2   46.10   11.80
  -1 -12   2   17.50   19.10
  13  -1   2   31.00   13.10
  -1 -12   2   33.30   17.30
 -13   4  -2   94.99   13.30
   4   9  -2   77.79   13.30
 -13   4  -2  134.79   13.50
   9 -13  -2  113.69   17.90
   4   9  -2   77.99   15.60
   4   9  -2   98.79   15.80
 -13   4  -2  127.29   16.60
   9 -13  -2  152.18   17.80
   9 -13  -2  130.69   15.60
   4   9  -2   92.09   17.00
 -13   4  -2  149.49   28.40
   9 -13  -2  126.29   16.00
 -13   4  -2  114.29   15.20
   9 -13  -2  109.99   14.60
 -13   4  -2  130.79   15.60
   9 -13  -2  116.99   23.50
  -4  -9   2  139.49   17.50
  13  -4   2  111.19   15.00
  13  -4   2   89.19   12.90
  13  -4   2  114.19   21.10
  -9  13   2  130.09   25.30
  -9  13   2  129.89   18.60
  -9  13   2  135.29   15.90
  -9  13   2  123.29   15.50
  13  -4   2  133.19   14.70
  -4  -9   2  127.49   16.40
  -4  -9   2  147.29   18.30
  13  -4   2   75.59   14.20
  -4  -9   2  117.49   13.60
  -4  -9   2  153.18   18.70
  -4  -9   2  133.29   20.30
  -9  13   2  107.39   15.50
   6 -13  -2  117.39   14.90
   6 -13  -2  139.69   17.00
   7   6  -2   98.99   15.50
   7   6  -2  151.48   17.10
   6 -13  -2  118.09   14.70
 -13   7  -2  115.99   14.50
   7   6  -2  127.19   16.50
 -13   7  -2  117.29   15.40
   7   6  -2  158.48   17.40
 -13   7  -2  161.58   28.50
 -13   7  -2  146.59   16.80
   6 -13  -2  156.78   19.30
   6 -13  -2  115.29   23.00
   7   6  -2  168.08   26.70
   6 -13  -2  144.19   16.50
 -13   7  -2  140.29   17.20
   7   6  -2  142.39   19.30
   7   6  -2  116.19   16.40
   6 -13  -2  112.89   14.20
 -13   7  -2  163.98   17.90
  -6  13   2  122.49   15.70
  -6  13   2   98.49   13.50
  -6  13   2  140.89   15.80
  -7  -6   2  173.48   18.50
  -6  13   2  132.59   17.90
  13  -7   2  115.69   19.10
  13  -7   2  153.98   17.60
  13  -7   2  133.99   16.00
  -6  13   2  147.99   18.60
  -6  13   2  125.99   18.60
  -7  -6   2  115.59   15.60
  -7  -6   2  141.79   13.80
  -6  13   2  158.78   23.80
  13  -7   2  153.68   18.60
  -7  -6   2  111.59   15.10
  13  -7   2  131.99   16.50
  -6  13   2  129.79   17.60
  -7  -6   2  139.79   17.60
  10   3  -2    9.50   23.80
 -13  10  -2    3.10    9.70
 -13  10  -2    4.80   10.00
 -13  10  -2   22.40   20.70
 -13  10  -2   19.10   10.50
  10   3  -2   11.20    9.90
   3 -13  -2   17.80   16.70
  10   3  -2   20.40    8.50
  10   3  -2   20.20   12.70
   3 -13  -2  -28.20   17.00
  10   3  -2   15.90    8.20
 -13  10  -2   -7.00   10.90
 -13  10  -2   18.70    8.40
 -13  10  -2    2.80   10.00
  10   3  -2   21.50   11.10
   3 -13  -2    3.60   11.70
   3 -13  -2    8.60    9.00
   3 -13  -2  -17.40    9.60
  -3  13   2    9.50    8.00
 -10  -3   2   19.90    7.40
  -3  13   2    9.70   10.60
  -3  13   2   24.60    9.40
 -10  -3   2    3.90    8.80
  13 -10   2   14.00   10.80
  -3  13   2   35.60   13.80
  -3  13   2    9.30   19.70
 -10  -3   2    7.90   11.00
  -3  13   2   17.10    8.60
  13 -10   2   19.40   10.90
  -3  13   2    7.20   12.00
  13 -10   2   24.00    9.90
 -10  -3   2    7.90   10.70
  13 -10   2    1.20   10.80
 -10  -3   2   15.40    8.20
  13 -10   2   24.40   11.40
 -13  13  -2  281.97   24.70
   0 -13  -2  270.57   26.00
 -13  13  -2  295.97   29.10
   0 -13  -2  358.96   42.40
   0 -13  -2  304.57   24.20
  13   0  -2  237.28   39.60
   0 -13  -2  222.98   28.70
  13   0  -2  291.57   43.90
  13   0  -2  322.87   21.40
  13   0  -2  306.77   25.90
 -13  13  -2  307.17   25.10
   0 -13  -2  300.77   37.80
  13   0  -2  268.77   29.30
  13 -13   2  300.77   29.00
  13 -13   2  280.97   27.30
 -13   0   2  281.27   27.40
   0  13   2  288.77   20.50
   0  13   2  244.98   28.10
  13 -13   2  294.87   26.50
 -13   0   2  276.67   34.90
   0  13   2  277.07   30.10
   0  13   2  300.67   25.90
  13 -13   2  279.57   35.20
  13 -13   2  256.27   31.70
   0  13   2  294.97   24.20
 -13   0   2  250.37   28.40
  -3 -13  -2  -31.10   26.40
  -3 -13  -2   27.00   15.90
 -13  16  -2   -0.60   14.00
  16  -3  -2   27.10   14.60
  -3 -13  -2   -9.80   26.10
  -3 -13  -2    9.70   33.80
  -3 -13  -2   14.80   14.30
 -13  16  -2    2.40   12.80
  16  -3  -2   38.40   38.10
  16  -3  -2   -9.40    9.10
 -13  16  -2   17.50   18.60
  16  -3  -2   29.10   18.90
 -16   3   2   33.30   20.80
   3  13   2   -2.20   18.10
 -16   3   2   24.40   16.40
  13 -16   2  -10.00   15.60
  13 -16   2  -18.40   16.60
  13 -16   2   -9.10   15.30
 -16   3   2   11.30   12.00
  13 -16   2    2.70   24.40
  13 -16   2    3.00   19.70
   3  13   2  -22.50   12.10
   3  13   2   13.50   12.50
   3  13   2    3.80   14.70
 -14  -3  -2   30.50   35.00
  17 -14  -2   -9.80   32.70
  -3  17  -2   -1.20   16.90
  -3  17  -2   13.00   21.10
 -14  -3  -2   11.70   18.10
  17 -14  -2   13.80   14.60
  17 -14  -2   10.20   18.00
  -3  17  -2  -10.10   12.00
  14   3   2   -4.70   14.00
 -17  14   2   -3.70   20.40
   3 -17   2    2.40   15.30
  14   3   2   14.40   13.50
 -17  14   2  -23.40   14.70
 -17  14   2   14.30   18.60
  14   3   2    4.70   18.90
   3 -17   2   16.50   25.70
   3 -17   2  -10.90   17.60
   3 -17   2   -5.70   33.60
 -14   0  -2  -35.50   23.30
   0  14  -2   21.80   15.90
  14 -14  -2  -13.40   25.80
  14 -14  -2    4.20   14.30
   0  14  -2    0.00   11.20
 -14   0  -2   -6.60    7.90
   0  14  -2  -22.30   14.80
 -14   0  -2    9.80    5.90
  14 -14  -2    2.50   15.10
 -14   0  -2  -16.60   23.30
   0  14  -2   -1.30    8.40
  14 -14  -2   19.00   12.60
 -14   0  -2   20.60   13.60
 -14   0  -2  -19.70   15.90
   0 -14   2   18.20   13.70
   0 -14   2   -3.00   19.70
  14   0   2   -5.10   22.50
  14   0   2   -7.70   11.20
 -14  14   2  -23.10   13.30
   0 -14   2   20.60   15.20
  14   0   2   16.70   11.30
   0 -14   2   22.40   19.80
   0 -14   2   10.10   10.40
 -14  14   2   -0.60   12.60
 -14  14   2  -17.30   14.90
  14   0   2   21.10   15.80
 -14   3  -2   49.70   25.60
  11 -14  -2  -11.60   20.20
  11 -14  -2    5.80   11.50
   3  11  -2   12.00   13.00
 -14   3  -2    1.40    9.60
   3  11  -2    5.70    7.20
   3  11  -2    4.90    9.80
 -14   3  -2    9.30   11.10
 -14   3  -2   -2.70    7.30
  11 -14  -2    7.60   18.30
 -14   3  -2   30.60   14.00
  11 -14  -2   21.70   11.90
  11 -14  -2   17.40   10.60
  14  -3   2    9.60    9.60
  -3 -11   2   15.40    8.40
  14  -3   2   11.40   10.20
 -11  14   2   16.50   11.50
  -3 -11   2    0.80   11.10
  14  -3   2   20.30   13.40
 -11  14   2    3.50   17.60
  -3 -11   2   31.80   16.90
  -3 -11   2   -3.50   11.20
 -11  14   2   17.10   13.60
 -11  14   2    9.40    8.20
 -11  14   2  -18.60   24.40
  14  -3   2   14.40   11.30
 -14   6  -2    8.70    8.60
   8 -14  -2   -9.90   15.20
 -14   6  -2  -10.30    7.90
   6   8  -2   -7.80   11.00
 -14   6  -2   24.10   21.70
   6   8  -2   27.30   10.70
   8 -14  -2   -0.80    9.60
   6   8  -2   27.10   14.50
   8 -14  -2    3.20   10.70
   6   8  -2    8.90   16.10
 -14   6  -2   -4.20   11.90
   6   8  -2  -25.60   17.60
   8 -14  -2   -9.20    9.10
   6   8  -2   -3.60    9.70
 -14   6  -2  -12.30   10.20
   8 -14  -2   -4.10   18.70
  14  -6   2    5.50   11.60
  -8  14   2   39.80   19.80
  -6  -8   2   21.10   11.40
  -6  -8   2    1.50   10.30
  -6  -8   2   -0.30    9.80
  -8  14   2    5.10    8.90
  -6  -8   2    5.30   15.10
  14  -6   2   10.70    9.50
  -6  -8   2   -1.10    7.00
  -6  -8   2   16.40   10.80
  -8  14   2   13.90   11.30
  -8  14   2   -7.00    9.30
  14  -6   2    4.10    8.50
   9   5  -2   11.30   13.00
   9   5  -2   13.90   11.60
 -14   9  -2   13.30   10.70
   5 -14  -2   36.90   20.50
 -14   9  -2   14.40   12.80
   9   5  -2    9.50    9.00
 -14   9  -2    5.00   10.30
   5 -14  -2   64.79   15.50
   5 -14  -2    7.30   10.40
   9   5  -2   16.50   12.20
 -14   9  -2    8.80    7.90
   5 -14  -2  -24.60   20.60
   9   5  -2   21.20   12.10
   9   5  -2    5.60    8.90
   5 -14  -2   13.20   13.70
   9   5  -2   15.40   23.50
   5 -14  -2   11.80    8.70
 -14   9  -2    3.40   21.50
  -5  14   2   19.10   10.10
  -9  -5   2   14.30    7.40
  -9  -5   2   10.90    9.40
  -9  -5   2    6.20   11.20
  14  -9   2    5.60    9.90
  -5  14   2   12.60   10.40
  -5  14   2   18.00    9.60
  -5  14   2   37.60   13.80
  -5  14   2  -13.00   20.70
  -9  -5   2   17.90   10.60
  -5  14   2   12.40   13.20
  14  -9   2   -2.50   12.20
  -9  -5   2    4.30    9.50
  14  -9   2   13.10   10.30
  -5  14   2   17.80    9.80
 -14  12  -2   45.30   27.10
   2 -14  -2   67.29   14.60
  12   2  -2   52.09   12.40
   2 -14  -2   34.10   23.70
 -14  12  -2   70.39   16.50
  12   2  -2   54.09   16.20
  12   2  -2   67.69   32.70
   2 -14  -2   46.30   11.30
 -14  12  -2   39.60   14.40
  12   2  -2   51.29   11.60
 -14  12  -2   79.49   13.90
  12   2  -2   38.40   15.90
   2 -14  -2    2.70   26.40
   2 -14  -2   51.79   16.90
 -12  -2   2   40.80   22.70
  -2  14   2   23.90    9.70
 -12  -2   2   59.39   10.90
 -12  -2   2   71.09   15.80
  14 -12   2   48.90   16.90
  -2  14   2   40.50   16.30
 -12  -2   2   77.29   15.60
  -2  14   2   55.29   17.20
  14 -12   2   34.10   13.30
  -2  14   2   17.30   25.00
  14 -12   2   38.30   13.80
  14 -12   2   52.09   13.80
 -12  -2   2   62.99   13.40
  -2  14   2   40.40   16.80
  -1 -14  -2   81.79   31.50
  15  -1  -2   47.00   11.60
  -1 -14  -2   38.10   30.10
 -14  15  -2   40.00   15.60
  -1 -14  -2  -36.20   21.90
 -14  15  -2   44.30   14.50
  15  -1  -2   52.49   15.80
  15  -1  -2   66.59   19.10
 -14  15  -2   54.99   20.20
  -1 -14  -2   83.09   18.00
  15  -1  -2   24.40   39.00
  -1 -14  -2   36.20   14.50
   1  14   2   42.50   13.70
   1  14   2   38.70   17.60
   1  14   2   40.40   13.40
   1  14   2   76.29   15.50
 -15   1   2   72.39   17.40
  14 -15   2   57.19   17.70
  14 -15   2  100.29   22.60
  14 -15   2   59.99   18.40
   1  14   2   72.39   20.30
  14 -15   2   75.59   19.60
  14 -15   2   39.70   23.60
 -15   1   2   32.20   28.70
 -15   1   2   46.20   18.30
  -1  16  -2   43.50   12.90
  16 -15  -2   70.79   34.90
 -15  -1  -2   37.50   18.60
  -1  16  -2   19.80   20.90
 -15  -1  -2   22.70   31.90
 -15  -1  -2   31.60   29.60
  16 -15  -2   67.89   17.10
  -1  16  -2    2.60   20.30
  16 -15  -2   30.20   19.60
  -1  16  -2   16.10   14.40
   1 -16   2   46.30   15.20
   1 -16   2   49.70   24.10
   1 -16   2   40.90   19.10
  15   1   2   42.40   19.80
 -16  15   2   45.50   20.20
  15   1   2    7.00   14.80
  15   1   2   15.10   14.30
   1 -16   2   55.79   18.00
 -16  15   2   30.00   14.20
 -16  15   2   13.70   17.30
 -15   2  -2   65.09   28.10
 -15   2  -2   55.59   30.50
  13 -15  -2   51.09   17.10
  13 -15  -2   59.49   16.20
 -15   2  -2   45.90   12.70
  13 -15  -2  111.79   19.30
 -15   2  -2   77.69   17.70
   2  13  -2   53.49   18.40
   2  13  -2   46.90   17.50
   2  13  -2   51.29   11.20
 -15   2  -2   62.09   10.30
   2  13  -2  126.29   20.40
  -2 -13   2   49.60   15.90
  -2 -13   2  102.89   24.40
  -2 -13   2   95.49   20.00
  15  -2   2   50.09   12.80
 -13  15   2   93.59   17.30
 -13  15   2   49.10   15.70
 -13  15   2   27.80   14.20
  15  -2   2   40.60   12.90
  -2 -13   2   69.39   13.00
 -13  15   2   60.29   19.50
  15  -2   2   80.99   19.80
  10 -15  -2   55.49   13.70
 -15   5  -2   86.99   12.20
   5  10  -2   57.69   14.10
 -15   5  -2   61.49   13.40
 -15   5  -2   70.29   16.50
  10 -15  -2   57.59   15.60
   5  10  -2   53.19   17.80
  10 -15  -2   68.09   14.40
   5  10  -2   65.39   17.00
 -15   5  -2   67.39   14.80
   5  10  -2   88.29   18.80
   5  10  -2   60.19   20.00
 -15   5  -2   48.70   28.80
   5  10  -2   57.09   10.20
  15  -5   2   79.99   14.60
 -10  15   2   71.09   15.30
  -5 -10   2   45.50   14.20
 -10  15   2   50.39   13.10
 -10  15   2   70.39   26.30
  -5 -10   2   85.89   22.10
 -10  15   2   73.69   15.10
  15  -5   2   81.49   13.60
  -5 -10   2   88.89   17.00
  -5 -10   2   77.89   12.60
 -10  15   2   39.80   16.00
  -5 -10   2   80.09   17.60
  15  -5   2   58.49   14.50
   8   7  -2   61.59   13.50
   8   7  -2   60.09   18.40
 -15   8  -2   60.89   12.40
 -15   8  -2   79.99   14.40
   7 -15  -2   58.79   24.00
   7 -15  -2   38.30   12.30
   8   7  -2   57.59   23.10
   8   7  -2   52.19   12.70
 -15   8  -2   75.39   26.50
 -15   8  -2   73.59   16.00
   7 -15  -2   30.80   18.10
   8   7  -2   61.59   27.30
   7 -15  -2   67.99   14.50
   8   7  -2   94.69   17.20
  -7  15   2   70.69   13.10
  15  -8   2   60.29   12.20
  -7  15   2   48.70   24.70
  -8  -7   2   65.69   15.50
  15  -8   2   50.59   13.60
  -7  15   2   58.59   18.00
  -8  -7   2   89.59   16.80
  -7  15   2   75.19   16.80
  -7  15   2   68.39   14.30
  -8  -7   2   38.20   12.00
  -8  -7   2   48.50    9.90
   4 -15  -2  -27.10   16.70
 -15  11  -2   18.30    9.90
  11   4  -2    7.60   10.90
 -15  11  -2   -3.90   13.90
 -15  11  -2   11.00   26.50
  11   4  -2   47.60   29.60
  11   4  -2    7.90   15.80
   4 -15  -2    7.40   11.30
   4 -15  -2  -11.30   22.60
   4 -15  -2    6.80   10.80
  11   4  -2   -2.30    9.90
  11   4  -2   -7.40   14.40
  15 -11   2   12.10   16.70
  15 -11   2   14.00   14.20
  -4  15   2    6.00   10.80
 -11  -4   2   30.90   14.50
  -4  15   2  -10.60   13.20
  15 -11   2   -6.80   10.30
  -4  15   2   30.00   17.00
 -11  -4   2   -9.90   14.20
 -11  -4   2   26.30   13.60
 -11  -4   2    1.90    7.90
  15 -11   2   -5.70   13.20
  -4  15   2   20.60   11.30
  -4  15   2   34.10   28.70
 -11  -4   2    6.00   11.20
  -4  15   2    3.50   10.10
  14   1  -2   38.70   18.80
   1 -15  -2   30.60   15.40
 -15  14  -2   48.60   13.90
  14   1  -2   51.69   15.20
  14   1  -2   38.30   12.50
  14   1  -2   84.69   40.80
 -15  14  -2   66.89   18.40
   1 -15  -2   38.10   30.20
   1 -15  -2  110.39   18.60
 -15  14  -2   22.40   31.10
 -15  14  -2   66.49   18.70
 -14  -1   2   28.90   16.70
  -1  15   2   42.50   18.80
  -1  15   2   51.89   13.60
  -1  15   2   47.90   17.90
 -14  -1   2   32.70   11.60
  15 -14   2   58.79   18.60
 -14  -1   2   22.40   13.60
  -1  15   2   29.10   11.70
  -1  15   2   55.49   13.70
  15 -14   2   20.40   14.30
  15 -14   2   17.50   21.00
  15 -14   2   48.30   21.70
 -14  -1   2    9.20   35.20
 -15  17  -2  -23.50   16.80
  -2 -15  -2    8.30   17.60
  17  -2  -2   23.50   30.70
  15 -17   2    2.90   17.40
   2  15   2    3.90   15.10
  15 -17   2   19.00   18.40
  15 -16  -2   37.10   15.40
   1  15  -2   46.00   19.30
   1  15  -2   59.59   13.10
  15 -16  -2  -21.90   34.80
 -16   1  -2   55.89   33.50
   1  15  -2   67.49   22.70
 -16   1  -2   31.60   31.50
 -16   1  -2   35.40   18.70
   1  15  -2   16.80   19.90
  15 -16  -2   37.10   19.00
  16  -1   2   67.09   21.50
  -1 -15   2   49.99   18.20
  -1 -15   2   22.90   13.70
  16  -1   2   52.29   15.60
 -15  16   2   46.00   18.90
 -15  16   2   24.50   21.50
  -1 -15   2   10.60   19.50
  16  -1   2   44.50   15.00
 -15  16   2   38.10   16.40
  -1 -15   2   -5.20   27.00
 -16   4  -2   80.99   17.70
 -16   4  -2   33.70   11.40
   4  12  -2   45.80   19.30
  12 -16  -2   34.90   15.00
 -16   4  -2   74.89   32.30
 -16   4  -2   29.30   12.40
  12 -16  -2   46.30   31.20
   4  12  -2   60.09   11.30
   4  12  -2   51.79   19.20
   4  12  -2   82.19   26.40
  12 -16  -2   65.39   18.60
   4  12  -2   63.39   16.60
  -4 -12   2   44.60   17.30
  16  -4   2   80.69   25.30
 -12  16   2   43.40   14.80
  16  -4   2   60.89   19.00
  -4 -12   2   42.50   12.20
  16  -4   2   18.00   12.40
  -4 -12   2   18.10   23.80
 -12  16   2   59.39   18.80
  16  -4   2   44.90   14.70
  -4 -12   2   55.99   18.30
 -12  16   2   52.69   15.00
 -16   7  -2   27.00   12.20
   9 -16  -2   38.70   25.20
   7   9  -2   77.09   21.40
   9 -16  -2   38.60   14.30
   7   9  -2   25.60   13.20
 -16   7  -2   45.50   30.80
   7   9  -2   38.70   18.20
   7   9  -2   11.10   16.20
   7   9  -2   73.39   25.20
   9 -16  -2   20.30   13.50
  -9  16   2   38.60   27.90
  16  -7   2   36.10   13.40
  -7  -9   2   48.70   13.80
  -7  -9   2    6.40   23.40
  -7  -9   2   28.90   14.20
  -9  16   2   54.19   14.20
  -7  -9   2   49.30   11.10
  -9  16   2   -2.10   15.70
  -9  16   2   42.70   17.40
  -9  16   2   22.80   12.30
  10   6  -2    7.70   12.40
  10   6  -2   -0.70   10.30
  10   6  -2   20.80   15.40
 -16  10  -2   -0.30   11.40
   6 -16  -2   -5.80   15.70
 -16  10  -2  -11.60   29.20
 -16  10  -2   19.40   29.40
  10   6  -2   11.90   17.30
   6 -16  -2   20.40   13.20
   6 -16  -2  -16.90   24.50
  10   6  -2   25.20   30.30
   6 -16  -2   25.00   12.80
  16 -10   2    9.90   14.00
  16 -10   2   10.90   13.30
  -6  16   2    1.30   17.10
  -6  16   2   28.00   11.90
 -10  -6   2   20.80   14.70
  -6  16   2    7.80   16.20
 -10  -6   2   27.00   10.00
 -10  -6   2   24.80   12.80
  -6  16   2   27.30   12.00
  16 -10   2   16.70   11.60
  16 -10   2   11.90    9.20
  -6  16   2   14.00   16.20
  13   3  -2  -36.00   36.60
 -16  13  -2   18.50   32.90
  13   3  -2   21.70   15.10
   3 -16  -2  -18.90   26.20
   3 -16  -2   35.80   15.20
   3 -16  -2   24.10   28.80
 -16  13  -2   21.90   17.40
  13   3  -2   23.40   13.00
  13   3  -2    1.40   19.00
 -16  13  -2   14.80   14.10
   3 -16  -2   -2.70   13.10
 -13  -3   2   -4.80   29.80
  16 -13   2   -1.90   19.30
  16 -13   2   49.30   17.50
 -13  -3   2    2.60   10.20
  16 -13   2   10.10   12.60
  -3  16   2    7.40   18.10
 -13  -3   2    3.70   15.60
 -13  -3   2   -5.30   13.00
  -3  16   2    2.70   11.90
  16 -13   2    2.90   18.20
  -3  16   2    5.30   18.20
  -3  16   2   19.60   13.20
  16   0  -2   43.80   48.20
   0 -16  -2   11.60   17.60
 -16  16  -2   17.80   18.70
   0 -16  -2   37.00   33.80
 -16  16  -2   11.20   37.40
  16   0  -2   27.40   21.00
 -16  16  -2   41.90   18.90
  16   0  -2    3.80   22.00
   0 -16  -2   -9.20   35.80
  16   0  -2    2.00   25.00
 -16  16  -2   51.79   21.70
  16 -16   2   31.50   30.60
   0  16   2   14.30   12.80
  16 -16   2    8.50   18.90
   0  16   2   40.80   16.40
   0  16   2   25.20   22.10
   0  16   2  -49.50   21.40
 -16   0   2   23.00   19.10
 -16   0   2   28.60   14.70
 -16   0   2    1.70   18.90
  16 -16   2    5.60   15.50
 -17   3  -2   38.50   34.20
  14 -17  -2   41.20   20.50
 -17   3  -2  -26.50   31.80
   3  14  -2   10.70   20.00
   3  14  -2   17.20   12.60
  14 -17  -2   11.10   18.60
  14 -17  -2  -13.30   36.80
 -17   3  -2   24.10   19.00
   3  14  -2   21.60   20.00
   3  14  -2    9.00   20.40
  -3 -14   2    4.70   18.10
  17  -3   2    3.40   13.90
 -14  17   2   24.10   17.20
  -3 -14   2   43.70   30.30
 -14  17   2   15.20   14.20
 -14  17   2  -24.20   19.60
  -3 -14   2   -1.10   12.90
  17  -3   2   20.00   15.80
  -3 -14   2   15.90   20.20
  17  -3   2    5.30   18.80
 -17   6  -2  907.01   48.40
  11 -17  -2  894.41   52.69
   6  11  -2  834.62   56.69
 -17   6  -2  878.51   72.49
   6  11  -2  856.91   54.79
   6  11  -2  829.22   45.50
  11 -17  -2  887.91   55.09
 -17   6  -2  852.71   51.99
   6  11  -2  873.21   52.49
 -17   6  -2  809.22   50.69
  11 -17  -2  880.31   68.39
  17  -6   2  891.71   51.49
  -6 -11   2  841.02   53.29
  -6 -11   2  837.42   46.30
  17  -6   2  849.12   49.50
  -6 -11   2  892.31   65.29
 -11  17   2  869.71   51.19
  17  -6   2  802.22   55.69
 -11  17   2  888.01   50.49
 -11  17   2  855.71   56.39
  -6 -11   2  894.51   54.09
 -17   9  -2  -14.50   32.20
   8 -17  -2  -26.50   28.20
   8 -17  -2   -8.90   13.80
 -17   9  -2   15.60   14.40
   9   8  -2   11.70   13.70
   9   8  -2   75.69   32.50
 -17   9  -2   32.30   16.30
   9   8  -2   -0.40   19.30
   8 -17  -2   34.40   15.60
   9   8  -2    2.70   14.50
   8 -17  -2   51.29   25.50
  -9  -8   2   35.60   17.80
  -9  -8   2   21.30   24.50
  -8  17   2  -17.40   10.70
  -8  17   2   13.10   13.20
  -9  -8   2   19.80   10.40
  -8  17   2    4.30   19.20
  17  -9   2   12.50   17.40
  17  -9   2   11.60   12.80
  -9  -8   2    4.20   15.70
 -17  12  -2  635.14   42.70
  12   5  -2  588.04   43.20
 -17  12  -2  670.13   45.40
   5 -17  -2  582.44   60.39
  12   5  -2  592.74   48.20
 -17  12  -2  751.72   68.59
   5 -17  -2  678.73   42.10
  12   5  -2  569.34   71.59
  12   5  -2  606.44   42.00
 -12  -5   2  579.84   44.60
  -5  17   2  611.94   48.50
  17 -12   2  734.93   47.80
 -12  -5   2  613.04   36.90
  17 -12   2  621.94   58.39
  -5  17   2  618.14   41.20
  -5  17   2  684.93   41.20
 -12  -5   2  613.64   46.20
  -5  17   2  644.34   48.90
  17 -12   2  620.94   43.90
 -17  15  -2   13.90   18.70
   2 -17  -2   15.00   16.50
  15   2  -2   29.90   19.40
  -2  17   2  -14.80   14.50
  17 -15   2    8.40   19.40
  17 -15   2  -12.20   14.40
  13 -18  -2   31.10   19.70
  13 -18  -2   -3.50   23.00
  18  -5   2   55.79   17.70
  18  -5   2   45.40   21.30
 -13  18   2   40.60   17.80
 -18   8  -2   68.39   20.10
  10 -18  -2  129.89   38.40
  10 -18  -2   79.99   19.50
 -18   8  -2  -26.00   40.20
   8  10  -2   51.59   20.30
   8  10  -2   14.80   17.90
   8  10  -2   61.09   23.70
  -8 -10   2   50.59   30.50
  18  -8   2   44.50   21.00
 -10  18   2   23.30   15.30
  -8 -10   2   63.39   21.70
  -8 -10   2   51.19   13.90
  18  -8   2   64.19   15.90
  18  -8   2   46.70   17.30
 -10  18   2   58.59   15.70
  -8 -10   2   22.90   18.10
 -10  18   2   93.69   23.00
  11   7  -2  222.58   28.00
 -18  11  -2   81.99   22.10
   7 -18  -2  192.98   24.30
  11   7  -2  182.38   24.70
  11   7  -2  114.59   25.70
   7 -18  -2  162.88   40.50
  11   7  -2  240.88   46.30
 -18  11  -2  143.49   44.30
 -18  11  -2  172.78   26.40
  18 -11   2  150.28   25.50
  -7  18   2  172.98   30.70
  -7  18   2  101.69   18.50
 -11  -7   2  147.49   17.40
  -7  18   2  165.68   21.20
 -11  -7   2   89.29   33.50
 -11  -7   2  167.18   26.50
  18 -11   2  209.48   25.50
 -11  -7   2   87.99   20.40
   0   0  -3  -11.90    7.10
   0   0  -3    1.90    4.50
   0   0   3    1.50    1.20
   0   0   3    0.00    1.00
   0   0   3    3.60    4.80
   0   0   3    2.20    2.10
   0   0   3   -6.90    4.20
   0   0   3  -13.20    7.60
   0   0   3    1.00    1.40
   0   0   3   -7.50    5.20
  -1   2  -3   33.70    3.80
   2  -1  -3   41.20    3.90
   2  -1  -3   34.40    3.40
  -1   2  -3   37.70    3.60
   2  -1  -3   29.90    3.30
   2  -1  -3   40.70    8.40
  -1   2  -3   35.00    4.70
  -1  -1  -3   66.29    9.00
   2  -1  -3   25.20   10.70
  -1   2  -3   18.70    7.30
  -2   1   3   36.90    4.10
   1  -2   3   41.10    5.10
   1   1   3   37.30    8.40
   1  -2   3   38.90    7.10
  -2   1   3   34.90    3.50
  -2   1   3   46.70   11.40
  -2   1   3   34.70    3.70
   1  -2   3   34.60    6.10
  -2   1   3   48.30   10.00
   1  -2   3   34.90    4.30
   1  -2   3   31.40   12.00
   1  -2   3   35.00    3.50
   1  -2   3   42.00    3.80
  -2   1   3   32.40    3.30
   1  -2   3   28.50    3.50
  -2   1   3   38.00    3.90
  -2   1   3   31.70    5.80
  -2   1  -3   40.00    4.50
   1   1  -3   36.70    3.70
   1  -2  -3   49.20    9.40
  -2   1  -3   37.10    6.90
   1   1  -3   37.50    3.00
   1   1  -3   30.50    2.90
   1   1  -3   22.70   10.20
   1   1  -3   37.00    5.60
   1   1  -3   33.90    3.60
  -2   1  -3   28.60    7.60
   1  -2  -3   39.90   10.80
  -1  -1   3   38.60    4.60
  -1  -1   3   33.20    3.90
  -1   2   3   31.80    8.40
  -1  -1   3   51.19   12.20
  -1  -1   3   26.90    5.30
  -1   2   3   38.40   10.70
  -1   2   3   42.30    7.80
   2  -1   3   32.10    3.20
  -1   2   3   36.90    4.40
   2  -1   3   30.30    7.40
  -1   2   3   46.20    8.70
  -1   2   3   38.70    3.00
   2  -1   3   33.20    2.70
   2  -1   3   33.20    2.70
  -1  -1   3   34.30    3.70
  -1   2   3   36.20    2.40
   2  -1   3   45.80    8.80
  -1   2   3   38.90    3.10
   2  -1   3   31.00   12.00
   2  -1   3   36.30    3.20
  -1  -1   3   35.30    2.70
  -1   2   3   37.40    3.50
   2  -1   3   36.60    6.70
  -1  -1   3   42.80    4.80
  -1   2   3   35.00    2.40
  -1  -1   3   35.10    4.00
   4  -2  -3 5201.08  223.58
   4  -2  -3 5219.38  234.48
  -2   4  -3 5417.46  223.48
  -2  -2  -3 5375.06  222.18
  -2  -2  -3 5687.93  230.48
  -2   4  -3 5109.39  224.68
  -2   4  -3 5174.48  223.78
  -2  -2  -3 5394.36  228.78
  -2   4  -3 5417.06  228.88
   4  -2  -3 5350.56  223.78
  -2  -2  -3 5480.15  230.58
   4  -2  -3 5377.36  231.18
   4  -2  -3 4794.22  224.38
   4  -2  -3 5176.58  223.58
   4  -2  -3 5264.97  223.78
   2  -4   3 5305.17  224.18
   2  -4   3 5366.06  224.78
   2  -4   3 5248.98  224.08
   2  -4   3 5122.19  236.58
   2  -4   3 5156.68  221.88
   2   2   3 5197.08  222.38
   2   2   3 5416.26  227.58
  -4   2   3 4951.90  225.88
   2  -4   3 5133.79  224.28
   2   2   3 5439.76  222.48
   2   2   3 5533.25  222.58
  -4   2   3 5008.80  223.68
   2   2   3 5482.25  224.58
  -4   2   3 5263.07  223.88
   2  -4   3 5019.60  223.68
  -4   2   3 5068.59  223.78
  -4   2   3 5256.87  224.38
   2   2   3 5543.25  229.88
   2   2   3 5573.04  232.08
   2  -4   3 5277.77  224.98
   2   2   3 5176.38  222.58
   2   2   3 5137.89  222.48
  -4   2   3 5143.58  230.68
   3  -3  -3   -0.40    1.90
   0   3  -3   -1.10    2.00
   3  -3  -3    1.90    8.20
   3  -3  -3    3.00    2.50
   3  -3  -3    4.80    6.90
  -3   0  -3   -1.40    1.40
   0   3  -3    1.00    8.40
   0   3  -3    1.00    2.50
  -3   0  -3   -7.40    5.30
  -3   0  -3   -3.30    6.20
   0   3  -3   -2.30    2.10
   0   3  -3   -1.40    4.40
   3  -3  -3   -1.10    1.70
   0   3  -3    3.10    3.20
   0  -3   3    0.20    2.20
   3   0   3   -1.30    1.40
   3   0   3    7.10    9.00
   0  -3   3   -3.10    2.20
   3   0   3    4.80    5.70
   0  -3   3    2.90    3.20
  -3   3   3    6.40    7.70
   0  -3   3   -0.60   11.00
   3   0   3   -1.30    1.60
  -3   3   3    1.00    1.20
   0  -3   3   -3.20    3.40
  -3   3   3   -4.90    6.40
  -3   3   3    2.80    1.90
   3   0   3   -2.60    1.30
   3   0   3   -1.10    1.40
   3   0   3   -5.50    4.80
   3   0   3   -0.90    7.00
  -3   3   3    0.10    2.20
  -3   3   3   -0.10    1.80
  -3   3   3   -1.30    2.40
  -3   3   3    1.50    2.60
   0  -3   3   -0.20    2.40
   3   0   3    1.30    1.50
   0  -3  -3   -3.80    7.20
   3   0  -3    2.40    2.60
   3   0  -3   -1.60    1.60
  -3   3  -3   -0.40    3.50
  -3   3  -3   -0.50    2.10
   3   0  -3   -4.20    9.30
  -3   3  -3    5.80    3.10
   0  -3  -3    1.80    2.20
  -3   3  -3   -0.50    1.70
   0  -3  -3    7.60    5.80
   3   0  -3   -1.00    2.00
  -3   3  -3    0.20    1.40
  -3   3  -3    3.10    6.10
   3   0  -3   -3.50    2.30
   0  -3  -3   -7.10    5.30
  -3   3  -3    0.90    1.40
   0   3   3   -1.40    2.10
   0   3   3    1.00    1.50
  -3   0   3   -1.40    2.90
  -3   0   3    2.20    2.20
  -3   0   3    8.20    9.00
  -3   0   3   -1.20    1.80
   0   3   3    0.60    1.40
   3  -3   3    1.50    2.10
   3  -3   3    1.30    2.10
   3  -3   3   -0.60    2.00
   0   3   3    5.60    6.20
   3  -3   3   -4.30    3.20
   3  -3   3    0.60    2.00
   0   3   3   -2.10    1.40
   0   3   3    1.40    2.20
   3  -3   3    0.70    2.60
   0   3   3    4.90    6.80
   0   3   3    5.50    7.60
  -3   0   3   -0.90    1.30
   0   3   3   -1.70    1.50
  -3   0   3    2.70    2.00
  -3   0   3    2.10    3.00
  -3   0   3  -10.30    6.60
   0   3   3    9.30    6.50
  -3  -3  -3   11.70    6.80
  -3  -3  -3   20.20    9.40
   6  -3  -3   14.00    8.70
  -3  -3  -3   14.40    3.20
   6  -3  -3   12.10    4.10
   6  -3  -3   16.10    4.20
  -3   6  -3   17.80    5.00
  -3   6  -3   14.20    4.50
  -3   6  -3   16.00    4.00
  -3  -3  -3   16.10    3.60
   6  -3  -3   12.50    4.10
   6  -3  -3   14.90    4.50
  -3   6  -3   12.90    2.90
  -3   6  -3    2.30    4.20
   6  -3  -3    6.90    4.70
   6  -3  -3   10.80   10.70
   3  -6   3   10.50    2.30
   3  -6   3   14.60    6.30
   3   3   3    6.60    8.30
  -6   3   3    0.10    8.40
   3   3   3   10.40    3.40
  -6   3   3   11.00    3.30
  -6   3   3   14.20    4.40
   3  -6   3   11.70    4.10
  -6   3   3   15.30    5.00
   3   3   3   12.90    9.50
   3   3   3   13.90    4.40
   3  -6   3    1.00    5.00
   3   3   3   13.50    3.30
   3   3   3   16.40    3.40
   3   3   3   12.70    1.70
   3  -6   3    9.70    3.60
  -6   3   3   12.90    3.70
   3  -6   3  -14.20   12.70
   3  -6   3   16.50    4.70
   3   3   3   13.30    1.50
   3  -6   3   12.80    3.90
  -6   3   3    6.80    7.10
   3   3   3   16.90   10.20
   3   3   3   16.50    4.10
  -1   5  -3   27.60    4.90
  -4  -1  -3   28.40    7.50
  -1   5  -3   26.20    4.60
  -4  -1  -3   29.10    4.10
  -1   5  -3   30.10    2.30
   5  -4  -3   29.50    5.00
  -1   5  -3   20.70    5.10
   5  -4  -3   28.90    1.90
  -4  -1  -3   38.40   10.20
  -4  -1  -3   30.80    8.90
  -1   5  -3   30.20    5.40
   5  -4  -3   31.40    4.60
  -4  -1  -3   33.00    4.40
   5  -4  -3   34.20   10.20
   5  -4  -3   43.30   12.40
  -1   5  -3   39.70    5.90
   5  -4  -3   33.90    5.30
   4   1   3   30.30    4.10
  -5   4   3   27.10    5.00
  -5   4   3   35.60    5.40
   1  -5   3   28.50    4.80
  -5   4   3   27.60    4.20
   4   1   3   28.30    5.10
   1  -5   3   26.50    4.70
   1  -5   3   26.20    4.30
  -5   4   3   24.90    5.20
  -5   4   3   36.10    5.50
   4   1   3   30.10    4.20
  -5   4   3   26.70   10.00
   4   1   3   23.60    4.10
   4   1   3   32.40    3.90
   1  -5   3   31.90    6.80
   4   1   3   14.10    8.30
   1  -5   3   40.40    7.40
   4   1   3   31.40   10.30
   4   1   3   29.50    6.40
   4   1   3   32.90    2.80
   1  -5   3   27.00    5.00
  -4   2  -3 5592.84  226.68
   2   2  -3 5288.57  226.88
   2   2  -3 5221.48  238.38
   2   2  -3 5023.60  226.18
   2  -4  -3 5289.37  226.18
   2   2  -3 5042.40  224.88
  -4   2  -3 5684.23  234.78
  -4   2  -3 5464.25  226.18
   2  -4  -3 5185.18  225.68
   2  -4  -3 5811.82  227.78
   2  -4  -3 5442.96  234.18
   2  -4  -3 5471.85  235.68
  -4   2  -3 5424.86  225.98
   2  -4  -3 5253.87  225.78
  -2  -2   3 5058.49  227.38
   4  -2   3 5291.07  230.18
  -2  -2   3 5099.29  227.18
  -2   4   3 5746.62  233.88
  -2  -2   3 5139.69  227.48
  -2  -2   3 5273.77  228.28
  -2   4   3 5330.77  226.58
   4  -2   3 5272.87  226.28
   4  -2   3 5193.08  226.28
   4  -2   3 5272.67  226.28
  -2   4   3 5338.27  226.08
  -2   4   3 5217.58  226.08
  -2   4   3 5300.77  226.28
   4  -2   3 5315.47  226.48
   4  -2   3 5484.15  234.28
   4  -2   3 5369.26  226.68
   4  -2   3 5633.94  229.48
  -2   4   3 5047.29  235.58
  -2  -2   3 5375.36  227.98
  -2  -2   3 5249.37  226.88
  -2  -2   3 5653.43  237.98
  -2   4   3 5372.96  226.28
  -2   4   3 5438.66  227.58
  -4   5  -3   26.20    4.50
   5  -1  -3   13.10    4.00
  -1  -4  -3   20.20    8.50
   5  -1  -3   22.70   11.90
   5  -1  -3   17.40    3.70
  -1  -4  -3   15.80    3.90
   5  -1  -3   16.10    4.80
   5  -1  -3   13.60    4.80
  -4   5  -3   26.30    4.90
   5  -1  -3   22.40    2.60
  -1  -4  -3   28.30    9.80
  -1  -4  -3   25.20    3.80
   5  -1  -3   23.90    4.30
  -4   5  -3   28.20    5.00
  -1  -4  -3   31.40    3.80
  -4   5  -3   20.90    4.70
  -4   5  -3   33.70    9.40
  -5   1   3   23.20    4.50
   1   4   3   19.20    3.50
  -5   1   3   21.70    4.40
  -5   1   3   22.80    4.70
   1   4   3   28.80    4.10
   1   4   3   34.00    8.80
   1   4   3   20.30    3.60
   4  -5   3   17.60    4.00
   4  -5   3   23.00    3.50
   4  -5   3   25.30    5.70
   4  -5   3   26.70    4.40
   1   4   3   15.00    9.00
   1   4   3   12.60    8.00
  -5   1   3    7.80    8.70
   4  -5   3   21.40    4.80
  -5   1   3   17.70    5.00
   1   4   3   23.90    4.40
   1   4   3   25.40    4.70
   1   4   3   25.50    9.30
   4  -5   3   22.80    4.90
  -5   1   3    9.90    4.40
   8  -4  -3 2301.37  100.89
  -4  -4  -3 2485.25  101.99
   8  -4  -3 2101.69   96.69
  -4  -4  -3 2450.75  105.09
  -4   8  -3 2313.87  101.59
   8  -4  -3 2171.58  100.69
   8  -4  -3 2236.38  113.69
  -4  -4  -3 2438.96   99.99
   8  -4  -3 2227.08  108.19
  -4  -4  -3 2350.06  109.89
  -4  -4  -3 2404.46   97.99
  -4  -4  -3 2354.66   99.49
   8  -4  -3 2233.78  100.99
  -4  -4  -3 2337.07   97.79
  -4   8  -3 2375.16  102.09
  -4   8  -3 2229.58  101.19
  -4   8  -3 2212.98   98.69
   8  -4  -3 2243.38  101.89
  -4   8  -3 2272.37  101.39
   8  -4  -3 2278.07  101.69
   4   4   3 2400.46  107.99
  -8   4   3 2166.58  106.79
  -8   4   3 2164.58  100.89
   4   4   3 2370.26  106.09
   4   4   3 2424.16  110.69
   4  -8   3 2236.58  101.69
   4  -8   3 2191.48  101.19
   4   4   3 2438.26  100.09
   4   4   3 2530.45  101.39
   4  -8   3 2273.67  101.79
  -8   4   3 2225.88  102.09
  -8   4   3 2157.38  101.79
   4   4   3 2377.26  101.59
  -8   4   3 2142.99  100.99
   4   4   3 2348.17   99.89
   4  -8   3 2007.60  102.99
   4  -8   3 2226.98   98.19
   4  -8   3 2241.68  103.29
   4  -8   3 2293.07  115.29
  -8   4   3 2211.18  101.19
   4  -8   3 2272.17  101.39
   4   4   3 2146.49  101.89
  -2   7  -3   73.99    5.40
   7  -5  -3   69.69    8.30
   7  -5  -3   65.29    4.40
  -5  -2  -3   67.09    5.30
   7  -5  -3   61.99    7.50
  -5  -2  -3   76.09    7.30
  -2   7  -3   76.39    8.50
   7  -5  -3   73.89    8.80
   7  -5  -3   76.99   17.30
   7  -5  -3   88.79   10.00
   7  -5  -3   63.79   14.80
  -5  -2  -3   81.79    7.50
  -5  -2  -3   80.99   10.80
  -5  -2  -3   62.79    5.20
  -2   7  -3   71.19    9.20
  -5  -2  -3   77.29   14.50
  -5  -2  -3   85.99   14.50
  -2   7  -3   70.89    8.90
  -2   7  -3   63.79    9.30
  -2   7  -3   66.59    8.60
   7  -5  -3   67.19    8.60
   5   2   3   65.29    8.10
   5   2   3   65.49   14.20
   2  -7   3   72.39    9.00
  -7   5   3   77.49    9.60
   2  -7   3   66.19   10.00
   5   2   3   58.39    6.60
   5   2   3   63.69    6.90
  -7   5   3   57.39   12.50
   5   2   3   73.29    8.70
  -7   5   3   67.39    7.70
   2  -7   3   80.89    9.40
   2  -7   3   68.09    6.10
   2  -7   3   72.69    8.90
  -7   5   3   69.49    8.70
   2  -7   3   68.69    8.50
   5   2   3   79.09    8.10
  -7   5   3   78.19    9.50
  -7   5   3   58.69    7.90
   2  -7   3   84.99   20.60
   2  -7   3   66.59   10.50
   1   4  -3   38.90    5.40
   4  -5  -3   45.50   10.90
   1   4  -3   25.70    5.00
   1   4  -3   27.50    2.10
   4  -5  -3   36.30    5.00
   1   4  -3   29.90    5.80
  -5   1  -3   40.80    8.20
   4  -5  -3   33.20    4.50
   4  -5  -3   29.70    5.20
  -5   1  -3   28.40    3.40
   1   4  -3   27.90    5.50
   1   4  -3   17.80    4.30
   1   4  -3   40.70   13.60
  -5   1  -3   28.90    3.50
  -5   1  -3   21.30    9.10
   4  -5  -3   13.90   10.00
  -5   1  -3   35.70    4.40
  -5   1  -3   25.50    2.40
   1   4  -3   31.90    5.80
   1   4  -3   30.70    2.40
   4  -5  -3   25.90    3.90
   4  -5  -3   26.00    3.60
  -5   1  -3   28.10    4.10
   4  -5  -3   30.60    4.10
  -4   5   3   22.90    4.30
  -4   5   3   28.10    9.30
   5  -1   3   35.70    4.70
   5  -1   3   40.70   12.10
   5  -1   3   28.00    5.80
  -1  -4   3   27.30    7.20
  -4   5   3   33.50    4.30
   5  -1   3   29.50    3.70
  -4   5   3   32.40    5.10
  -1  -4   3   22.10    4.70
   5  -1   3   26.30    4.30
  -1  -4   3   32.70    5.60
  -4   5   3   30.80    4.70
   5  -1   3   36.90    4.50
   5  -1   3   38.00    4.50
  -1  -4   3   40.60    5.90
  -1  -4   3   35.90    5.80
  -1  -4   3   33.70    5.70
  -4   5   3   25.00    4.00
  -4   5   3   18.50    9.30
   4   1  -3   21.90    3.60
   4   1  -3   20.30    5.20
  -5   4  -3   20.90    4.30
  -5   4  -3   26.50    4.40
   1  -5  -3   18.50    3.80
  -5   4  -3   19.20    9.30
   1  -5  -3   24.20    8.60
   4   1  -3   11.00    4.40
  -5   4  -3   20.90    5.30
   4   1  -3   15.50   11.20
   1  -5  -3   25.40    3.90
  -5   4  -3   26.30    3.90
   4   1  -3   26.80    5.00
  -5   4  -3   22.90    3.90
  -5   4  -3   22.30    4.30
   1  -5  -3   17.90    9.00
   4   1  -3   24.10    4.20
   4   1  -3   26.50    4.40
   1  -5  -3   20.50    3.50
  -4  -1   3   19.30    4.40
  -4  -1   3   19.80    5.00
  -1   5   3   19.80    3.80
  -1   5   3   29.80    8.60
   5  -4   3   18.60    4.10
   5  -4   3   19.40    4.20
   5  -4   3   24.20    4.70
  -1   5   3   19.70    8.90
  -4  -1   3   24.80    3.30
   5  -4   3   24.20    5.30
  -1   5   3   26.10    4.90
  -4  -1   3   26.90    5.70
  -1   5   3   28.50    4.50
   5  -4   3   17.80    4.00
   5  -4   3   21.70    4.10
  -1   5   3   28.60    4.60
  -1   5   3   24.80    3.90
  -1   5   3   25.60    4.00
  -4  -1   3   13.30   11.60
  -5   7  -3  101.09   10.00
  -2  -5  -3   96.59    6.30
  -2  -5  -3   95.59    6.10
  -5   7  -3  119.69   10.70
  -2  -5  -3  102.49   16.60
   7  -2  -3   99.69   11.00
  -5   7  -3   98.89   10.20
   7  -2  -3  102.59    9.50
  -5   7  -3  111.89    8.90
  -2  -5  -3   97.59    8.10
  -2  -5  -3  100.69    8.30
   7  -2  -3   95.09    5.90
   7  -2  -3  100.09   20.20
  -2  -5  -3  110.89   15.10
   7  -2  -3   91.79   15.60
  -5   7  -3   96.39   10.30
   7  -2  -3   85.49    8.90
  -5   7  -3  102.39    9.00
  -2  -5  -3  101.09    9.90
   7  -2  -3   98.49    9.70
  -7   2   3   97.89   16.50
  -7   2   3   92.09    9.50
   2   5   3   90.29    8.20
  -7   2   3  101.69   11.20
   2   5   3  122.99   17.70
   5  -7   3  109.49   12.00
   5  -7   3  112.19   10.20
   2   5   3   96.39   13.10
   5  -7   3  103.39   10.10
   2   5   3  106.59    6.10
  -7   2   3  106.29    9.70
  -7   2   3   95.09   10.40
   5  -7   3   94.39   10.00
   2   5   3   98.09    9.80
   2   5   3  105.29   16.90
   2   5   3  101.39    9.10
   5  -7   3  109.59    7.70
   2   5   3  104.09    8.30
   5  -7   3  105.79   10.00
  -7   2   3   80.49    9.10
   2   5   3  112.39    9.50
  10  -5  -3   23.00    8.40
  10  -5  -3   17.40   13.30
  10  -5  -3   13.40    3.00
  -5  10  -3   36.20    8.80
  -5  -5  -3    8.80    5.20
  -5  -5  -3    2.00    4.80
  -5  -5  -3   19.50    5.60
  10  -5  -3   25.20   16.60
  10  -5  -3   11.20    8.40
  -5  10  -3   26.60    8.70
  -5  -5  -3   -1.30   12.90
  10  -5  -3   15.40    6.60
  -5  -5  -3   20.50    7.40
  10  -5  -3   24.80    7.30
  -5  10  -3   13.60    7.70
  -5  -5  -3   10.30    4.50
  -5  -5  -3   16.40    9.80
   5   5   3    7.80    6.70
   5   5   3   17.50    5.30
   5   5   3  -12.00   15.70
   5   5   3    8.00    7.10
   5 -10   3   16.50    4.80
 -10   5   3   14.70    7.80
   5 -10   3   21.20    6.60
 -10   5   3    6.30    5.20
 -10   5   3   13.40    8.20
 -10   5   3   29.40    7.30
 -10   5   3   13.90   11.60
 -10   5   3   12.80    7.50
   5   5   3    4.90    6.50
   5 -10   3   23.20    7.00
   5   5   3   -3.60   10.90
   5 -10   3   11.10    7.20
   5 -10   3   25.80    7.20
   5   5   3    6.90    4.80
   9  -6  -3    9.80    6.50
   9  -6  -3    9.40    5.40
   9  -6  -3    7.70    3.40
   9  -6  -3   27.30   13.20
  -3   9  -3    4.90    6.50
  -3   9  -3    2.00    6.70
  -3   9  -3    5.70    6.30
  -6  -3  -3   16.50    5.30
   9  -6  -3    6.00   14.40
   9  -6  -3   10.70    6.00
   9  -6  -3   11.80    5.30
  -6  -3  -3    7.60    4.60
  -6  -3  -3   57.39   15.40
  -6  -3  -3   10.30    7.60
  -6  -3  -3    8.90    4.10
  -3   9  -3    9.40    3.50
  -6  -3  -3   11.50    4.20
  -3   9  -3   -1.20    6.20
  -6  -3  -3   14.10   11.20
  -9   6   3    6.00    6.00
  -9   6   3   14.20    7.40
   6   3   3   11.40    4.30
   6   3   3   11.30    5.80
   6   3   3    1.80    5.20
  -9   6   3   10.50    6.40
   3  -9   3    2.60    5.40
   6   3   3   10.00    3.90
   6   3   3  -12.20   14.20
   3  -9   3    7.90    5.70
  -9   6   3    4.50   11.50
   3  -9   3    3.40    5.20
   6   3   3   -6.00    4.60
  -9   6   3    4.80    5.00
   3  -9   3    3.80    7.10
  -9   6   3    6.60    5.30
   3  -9   3   -0.10    5.50
   3  -9   3    5.40    9.10
   3  -9   3   19.90   19.40
   0   6  -3   -0.50    1.60
   0   6  -3   -1.30    4.70
  -6   0  -3   -0.40    1.60
  -6   0  -3   -2.50    2.20
   0   6  -3   -4.60    3.20
   6  -6  -3   -1.30   10.10
   6  -6  -3   -2.20    2.00
   0   6  -3    9.20    4.90
   6  -6  -3    3.80    3.70
  -6   0  -3    4.90    9.70
  -6   0  -3    8.20    8.50
  -6   0  -3    2.30    3.10
   0   6  -3    2.40    5.10
   6  -6  -3   -0.50    4.20
  -6   0  -3   -2.00    2.50
   6  -6  -3   -7.70    9.10
   6  -6  -3   -0.20    2.80
   6  -6  -3   -0.40    4.50
   0   6  -3   -1.80    4.20
   6  -6  -3   -4.30    4.00
  -6   0  -3   -2.20    2.30
   6   0   3    1.00    2.80
   6   0   3   -4.80    3.10
   0  -6   3   -2.80    5.60
   0  -6   3    2.10    4.30
   0  -6   3    1.00    5.50
   6   0   3   -3.80   10.80
  -6   6   3   -1.30    3.20
  -6   6   3    2.20    3.30
   6   0   3    1.70    3.90
   0  -6   3    3.70   12.60
   6   0   3   -4.00    2.50
   6   0   3   -0.70    3.60
   0  -6   3    0.30    3.90
  -6   6   3    8.60    8.90
   0  -6   3   -2.70    3.60
  -6   6   3   -2.70    3.60
   6   0   3   -0.20    1.90
   0  -6   3   -2.50    4.00
  -6   6   3    6.00    4.50
  -6   6   3   -2.10    4.40
   3   3  -3   14.40    2.80
   3   3  -3   20.30    5.80
   3   3  -3   17.70   11.70
   3  -6  -3   10.40    9.40
   3  -6  -3   15.80    3.60
  -6   3  -3   21.00    4.00
  -6   3  -3    4.20    6.30
  -6   3  -3   14.60    3.30
  -6   3  -3   12.50    3.50
   3   3  -3    9.40    4.80
   3  -6  -3   12.80    2.90
   3   3  -3   10.00    4.10
   3  -6  -3   13.90    3.20
   3  -6  -3   27.60    9.90
  -6   3  -3   16.60    3.70
   3  -6  -3   15.60    3.60
   3   3  -3   16.60    4.70
   3   3  -3   14.90    4.70
   3  -6  -3   16.20    4.70
  -6   3  -3   11.00    9.70
   3  -6  -3   17.30    3.90
  -6   3  -3   12.20    3.40
   6  -3   3   15.90    4.20
  -3  -3   3    4.90    4.30
   6  -3   3   11.00    3.40
  -3   6   3   14.90    3.70
   6  -3   3   17.20    4.00
  -3  -3   3   11.90    4.20
   6  -3   3   17.10    4.10
  -3   6   3   19.00    4.80
  -3   6   3   13.70   10.00
  -3  -3   3   20.40   11.60
  -3  -3   3   26.40    5.30
   6  -3   3   15.00    5.90
  -3   6   3   11.40    4.60
  -3   6   3   17.20    4.30
   6  -3   3   23.30   10.90
  -3   6   3   13.10    4.10
  -3  -3   3   23.50    6.50
  -3  -3   3   17.70    4.10
  -3   6   3   18.00    3.90
  -3  -3   3   17.50    4.00
  -3   6   3    7.10    7.70
   6  -3   3   12.80    5.00
   6  -3   3   16.80    4.90
   6   0  -3    0.10    8.60
  -6   6  -3   -0.50    3.50
   0  -6  -3   -0.30    3.40
   6   0  -3   11.50   13.10
   0  -6  -3    0.90    2.00
   6   0  -3    3.10    3.30
   0  -6  -3   -1.50    3.60
  -6   6  -3   -2.80    3.70
   0  -6  -3   -0.40    2.80
   6   0  -3    2.30    2.80
   0  -6  -3    5.20    7.20
   6   0  -3    0.00    5.00
  -6   6  -3    3.90    4.10
   6   0  -3    3.40    3.40
  -6   6  -3    1.90    9.40
   0  -6  -3    7.00    9.70
   0  -6  -3    8.70    8.80
  -6   6  -3    2.10    3.30
  -6   6  -3   10.60    4.70
   6   0  -3    5.80    3.80
  -6   6  -3   -2.70    2.70
   0  -6  -3    0.90    2.30
   6  -6   3    2.20    3.50
  -6   0   3   -2.20    3.30
   6  -6   3   -3.10    4.10
   0   6   3   -3.90    3.30
   0   6   3    1.60    3.80
   0   6   3   -2.10    3.10
   0   6   3   -3.30    2.80
   0   6   3    1.00    3.70
  -6   0   3    0.00    2.00
  -6   0   3    2.60    3.20
   0   6   3    1.30    9.40
   0   6   3   -0.60    4.10
  -6   0   3    1.10   10.50
   6  -6   3    1.80    3.80
   6  -6   3    5.60    4.10
  -6   0   3   -0.70    4.30
  -6   0   3   -4.50    4.90
   0   6   3    0.10    2.90
   6  -6   3   -0.10    5.40
   6  -6   3    0.00    3.40
   9  -3  -3    1.50    5.50
  -3  -6  -3    8.80    5.80
   9  -3  -3    6.60    7.60
   9  -3  -3    6.70    4.50
   9  -3  -3    9.60    6.90
  -6   9  -3   -3.00    6.90
   9  -3  -3    8.80   15.10
  -3  -6  -3    9.90   10.10
  -6   9  -3    4.80    4.50
  -6   9  -3    6.20    5.90
  -3  -6  -3    1.80    4.00
  -6   9  -3   -3.00    6.30
  -3  -6  -3    2.20    3.70
   9  -3  -3    8.60    5.40
  -3  -6  -3   -7.80   11.30
  -3  -6  -3    3.60    4.10
  -3  -6  -3    6.10    4.70
  -6   9  -3    1.40    4.30
  -6   9  -3    5.80    6.20
   9  -3  -3    4.00    2.40
  -9   3   3   14.20    8.00
  -9   3   3    3.70    5.00
  -9   3   3   -7.80    6.10
   3   6   3    8.80   12.40
   6  -9   3    6.80    5.60
   3   6   3    3.10    5.40
   3   6   3   -1.70   14.00
   3   6   3    2.60    5.10
   6  -9   3    4.80    4.00
   3   6   3    9.00    7.00
   6  -9   3    3.80    5.30
  -9   3   3    6.50   12.10
   6  -9   3    7.20    6.10
   6  -9   3    0.60    5.00
   3   6   3    4.70    1.60
   3   6   3    8.30    6.20
   6  -9   3   -4.30    7.80
  -9   3   3    4.20    5.80
  -9   3   3    7.10    5.80
   3   6   3    5.40    4.10
   6  -9   3    8.10    8.00
  -6  12  -3   12.70    9.90
  12  -6  -3   14.90    7.50
  -6  12  -3    7.50   10.80
  12  -6  -3   27.40    9.90
  12  -6  -3   13.90    8.50
  12  -6  -3   18.20   12.40
  -6  12  -3    8.70    5.60
  12  -6  -3   12.90    4.10
  -6  -6  -3   11.30   11.70
  -6  12  -3   21.50    8.60
  12  -6  -3   22.90    9.50
  -6  -6  -3   -2.40   15.50
  -6  -6  -3   17.30    6.40
  12  -6  -3   29.20   21.20
   6   6   3    4.40    9.20
   6 -12   3    9.40    8.80
   6   6   3   10.30    7.70
   6   6   3    4.60    7.30
   6   6   3   13.40   11.70
 -12   6   3    8.10    7.10
   6 -12   3    2.10    5.20
 -12   6   3   -7.70    8.60
   6   6   3   15.80   10.20
   6   6   3   16.90   22.90
   6 -12   3   19.10   13.90
 -12   6   3   14.80   10.00
   6 -12   3   12.70    8.80
   6 -12   3    0.50    7.10
 -12   6   3    8.90   14.30
 -12   6   3   10.20   11.40
   6 -12   3    0.20    8.40
   6   6   3    6.90    5.90
 -12   6   3   19.70    9.40
  -4  11  -3  103.99   13.60
  -7  -4  -3  125.09   11.20
  11  -7  -3  118.19   10.70
  -4  11  -3   78.69   12.60
  11  -7  -3  109.79   20.90
  -4  11  -3   99.19    9.60
  -7  -4  -3   99.09   11.50
  -4  11  -3  105.09   14.80
  -7  -4  -3  123.19   14.80
  -4  11  -3  111.29   13.40
  11  -7  -3  119.19   14.00
  -7  -4  -3  103.69   20.10
  -4  11  -3  109.89   14.40
  11  -7  -3   99.59   13.20
  11  -7  -3  102.59   13.50
  11  -7  -3  115.29   13.10
   4 -11   3   88.89   12.40
   7   4   3  125.09   24.30
 -11   7   3  108.69   13.80
   4 -11   3  110.39   14.60
   7   4   3  116.19   12.30
 -11   7   3   71.79   12.10
   4 -11   3   97.49   15.20
   4 -11   3  110.79   28.80
   4 -11   3  103.69   15.80
 -11   7   3   84.39   12.70
 -11   7   3  108.19   17.10
   7   4   3  113.29   13.40
   7   4   3  117.49   11.60
   7   4   3  120.89   12.90
   7   4   3  119.89   13.80
   4 -11   3  109.69   13.30
 -11   7   3  116.09   13.20
 -11   7   3  108.99   13.80
  -1   8  -3   11.30    3.00
  -1   8  -3   -6.70    6.00
  -7  -1  -3    6.80    4.30
   8  -7  -3   25.10   15.20
  -7  -1  -3    3.20   11.20
  -7  -1  -3    6.60    5.50
  -7  -1  -3   14.10    4.40
  -1   8  -3    6.00    6.00
  -1   8  -3   18.80    7.70
  -1   8  -3    5.30    6.60
   8  -7  -3   15.80    3.70
  -7  -1  -3   22.50   12.90
  -7  -1  -3   14.00    4.70
   8  -7  -3    6.00    6.30
   8  -7  -3   22.20    6.30
   8  -7  -3   13.90    4.90
   8  -7  -3    8.70    6.20
   8  -7  -3   20.10    5.50
  -7  -1  -3   15.60    4.20
   8  -7  -3   11.80   12.00
  -8   7   3   13.30   10.80
  -8   7   3   12.80    6.70
   7   1   3   19.10    5.90
  -8   7   3   19.10    6.80
  -8   7   3   23.10    5.70
   1  -8   3    9.90    5.90
   7   1   3   18.90    5.80
   7   1   3   12.30    5.10
   1  -8   3   17.90    6.30
   1  -8   3    5.80    8.00
  -8   7   3   17.00    5.80
   1  -8   3   16.90    6.00
   7   1   3   12.90    4.70
   1  -8   3   26.30   15.90
  -8   7   3   19.50    6.40
   1  -8   3   13.90    6.90
   7   1   3   15.10    4.50
   1  -8   3    6.90    5.70
   7   1   3   15.50   14.10
   1  -8   3   18.30    6.40
   2   5  -3   61.09    9.00
  -7   2  -3   74.69    6.60
   5  -7  -3   66.09   14.30
  -7   2  -3   74.09    7.70
  -7   2  -3   78.69   11.70
  -7   2  -3   66.09    6.90
   5  -7  -3   60.99    8.10
   2   5  -3   69.79   16.10
   2   5  -3   77.59    9.10
   5  -7  -3   61.09    7.50
   5  -7  -3   68.19    8.50
  -7   2  -3   79.29    8.80
   2   5  -3   86.29   10.70
   5  -7  -3   63.89    6.50
  -7   2  -3   68.69   14.90
  -7   2  -3   69.49    6.20
   2   5  -3   58.09    8.30
   5  -7  -3   71.39    8.10
   5  -7  -3   51.09   13.00
   7  -2   3   46.30   14.70
  -2  -5   3   67.89    8.60
   7  -2   3   72.09    7.30
  -5   7   3   80.59   10.00
  -5   7   3   85.19    8.80
   7  -2   3   72.79    7.50
  -2  -5   3   74.89    9.60
  -5   7   3   59.69    7.80
  -2  -5   3   62.19    8.60
  -5   7   3   71.59    8.80
  -5   7   3   65.49    8.30
  -5   7   3   71.69   13.60
   7  -2   3   83.69    8.60
  -2  -5   3   82.79   17.30
  -2  -5   3   61.99    9.90
  -2  -5   3   76.69    9.40
  -2  -5   3   76.39    9.00
  -5   7   3   68.89   15.30
   7  -2   3   59.49    7.60
   7  -2   3   62.39    7.60
  -5   7   3   78.89    7.80
   2  -7  -3   99.29   16.20
  -7   5  -3  101.89    9.30
  -7   5  -3   91.49   12.60
   2  -7  -3  107.69   16.50
   5   2  -3   93.89    8.90
   2  -7  -3   98.59   15.80
   2  -7  -3   99.69    8.40
   5   2  -3   87.09   11.50
   2  -7  -3   99.79    7.60
   5   2  -3   95.89   10.00
  -7   5  -3  105.59    8.80
   2  -7  -3  109.69    9.40
   5   2  -3  112.49   21.00
   5   2  -3   86.69    8.10
   2  -7  -3  107.29    8.40
   5   2  -3  114.59   11.00
  -7   5  -3  102.39    9.00
  -7   5  -3  102.29   17.30
   2  -7  -3  102.59    8.00
   5   2  -3   94.19    9.40
  -7   5  -3  110.89    9.20
  -2   7   3   95.89    8.70
  -2   7   3   87.09    9.20
  -5  -2   3   88.79    9.00
  -2   7   3  102.59    9.00
   7  -5   3   95.49    8.90
   7  -5   3  105.29    9.00
  -2   7   3   96.89    9.90
   7  -5   3  111.39   11.90
  -5  -2   3   69.69    9.60
   7  -5   3  110.79    9.70
   7  -5   3  120.89    9.60
  -2   7   3   94.39   16.40
  -2   7   3   94.29    9.30
  -5  -2   3  106.39   10.10
   7  -5   3   93.99    9.70
  -2   7   3   99.09    9.40
  -5  -2   3   94.79    7.70
  -5  -2   3  103.79   10.00
  -5  -2   3   95.89   10.50
  -2   7   3   86.39    8.10
  -1  -7  -3   12.40   11.90
  -7   8  -3   11.90    6.20
   8  -1  -3   13.20    5.20
   8  -1  -3    2.80    5.30
   8  -1  -3   14.50    7.30
   8  -1  -3   13.70    5.30
  -1  -7  -3   12.30    5.30
  -7   8  -3   12.00    4.60
  -7   8  -3   14.10    5.80
  -7   8  -3    2.20    4.80
  -1  -7  -3   11.80    4.00
   8  -1  -3   -0.80   15.30
  -1  -7  -3   18.50    5.30
  -7   8  -3    6.60    5.80
   8  -1  -3    5.10    4.90
  -1  -7  -3    7.90   10.60
  -1  -7  -3    4.70    3.80
  -7   8  -3   18.50   12.90
  -1  -7  -3    8.60    4.40
   8  -1  -3   18.30    7.30
  -7   8  -3    8.90    6.10
   1   7   3  -13.80   11.50
   1   7   3   17.00    6.20
   1   7   3   11.90   12.50
   7  -8   3   10.80    6.00
   7  -8   3   10.50    5.80
  -8   1   3    2.00    4.40
   1   7   3    9.30    5.50
   7  -8   3   12.40    4.60
   1   7   3   13.40    4.50
   1   7   3    1.50    5.20
  -8   1   3   11.10    7.30
  -8   1   3   -1.90   10.90
   7  -8   3   13.00    5.60
   1   7   3   13.60    3.40
  -8   1   3   10.40    5.70
  -8   1   3   14.70    5.60
   1   7   3   10.50    5.60
   7  -8   3    2.90    6.50
  -8   1   3   18.60    7.00
   7  -8   3    5.60    5.30
   1   7   3    9.40    4.60
  11  -4  -3  162.08   29.60
  11  -4  -3  107.59   13.90
  -7  11  -3  116.99   14.40
  -7  11  -3  142.39   14.70
  -4  -7  -3  150.78   12.80
  11  -4  -3  114.39    8.90
  11  -4  -3  137.39   15.30
  -7  11  -3  127.39   16.10
  11  -4  -3   99.89   13.30
  11  -4  -3  152.38   17.50
  11  -4  -3  118.99   15.70
  -7  11  -3  159.08   17.90
  -4  -7  -3  153.38   23.50
  -4  -7  -3  146.29   11.60
  -4  -7  -3  134.79   18.70
  -4  -7  -3  156.48   14.60
  -7  11  -3  118.09   12.10
 -11   4   3  127.59   16.60
   7 -11   3  113.59   11.20
 -11   4   3  121.89   13.90
 -11   4   3  118.39   15.10
   4   7   3  120.29   15.90
 -11   4   3  145.09   16.10
   7 -11   3  155.28   16.40
   7 -11   3  131.79   15.00
   4   7   3  148.39   17.30
   7 -11   3  145.69   14.20
   4   7   3  130.09   12.80
   4   7   3  147.79   13.90
   4   7   3  115.19   24.50
   7 -11   3  133.89   17.80
   7 -11   3  112.09   14.60
 -11   4   3  100.59   19.50
 -11   4   3  105.69   15.20
 -11   4   3  125.49   15.80
  -7  14  -3   13.30   14.10
  14  -7  -3   10.80    4.80
  14  -7  -3  -15.30   10.90
  -7  -7  -3   -0.20   15.80
  -7  -7  -3   11.00    8.40
  -7  -7  -3    5.50   25.30
  -7  14  -3   13.80    9.70
  14  -7  -3   12.20   10.50
  -7  -7  -3   16.50    9.20
  -7  -7  -3   14.40   10.20
  -7  14  -3   17.00    7.80
   7   7   3   -4.40   15.30
   7   7   3   15.10    8.20
 -14   7   3    5.40   11.90
   7 -14   3   23.80   11.80
   7 -14   3  -43.70   34.00
   7   7   3   16.00    9.80
   7 -14   3    5.50    9.20
 -14   7   3   17.20   12.00
   7 -14   3   11.50   13.50
   7   7   3   11.00    6.80
   7   7   3   12.40   12.70
 -14   7   3    6.30   16.70
   7 -14   3   17.40   13.80
 -14   7   3    7.10   17.40
 -14   7   3   11.50   11.60
 -14   7   3   11.40    8.20
   7   7   3   13.90    8.40
   7 -14   3   13.10    7.50
  13  -8  -3   60.39   20.80
  -5  13  -3   24.90   10.90
  -8  -5  -3   54.79   10.50
  -8  -5  -3   39.10   10.00
  -5  13  -3   20.80   11.40
  -8  -5  -3   29.20   12.10
  13  -8  -3   41.40   10.60
  -5  13  -3   38.10   13.30
  13  -8  -3   36.20   11.60
  13  -8  -3   46.60    8.90
  13  -8  -3   36.00    5.70
  -8  -5  -3   33.10    8.90
  -5  13  -3   47.80    8.20
  -5  13  -3   57.39   11.50
  -8  -5  -3   49.90   22.20
 -13   8   3   44.00   13.00
 -13   8   3   35.20   10.40
   8   5   3   48.10   13.30
   8   5   3   43.40   10.30
   5 -13   3   52.59   30.60
   5 -13   3   39.30   10.70
 -13   8   3   50.89   10.50
   8   5   3   45.80   10.70
   8   5   3   14.60   11.80
   5 -13   3   35.90   11.60
   8   5   3   18.10   25.40
   8   5   3   31.60    8.20
 -13   8   3   40.70   12.00
 -13   8   3   55.89   17.30
   5 -13   3   46.40   12.30
   5 -13   3   40.70   12.20
  -8  -2  -3 1187.38   63.09
  10  -8  -3 1038.40   52.89
  10  -8  -3 1170.18   64.19
  -2  10  -3 1101.39   54.59
  -2  10  -3 1141.09   56.49
  10  -8  -3 1147.59   54.39
  10  -8  -3 1097.59   54.59
  -2  10  -3 1129.19   54.89
  -2  10  -3 1106.49   53.79
  -8  -2  -3 1076.99   51.89
  -8  -2  -3 1180.68   50.99
  -8  -2  -3 1050.59   61.89
  -8  -2  -3 1184.78   50.89
  -2  10  -3 1035.40   52.99
  10  -8  -3 1088.69   53.29
  10  -8  -3 1098.49   49.99
  -2  10  -3 1096.39   49.40
  10  -8  -3 1090.79   53.09
 -10   8   3 1115.39   53.29
   8   2   3 1051.29   52.89
   2 -10   3 1093.89   51.49
   8   2   3 1066.79   64.09
 -10   8   3 1067.79   54.29
 -10   8   3 1063.19   53.39
   8   2   3 1054.99   53.29
   2 -10   3 1148.69   54.59
   2 -10   3 1070.99   52.99
   2 -10   3 1102.89   57.29
 -10   8   3 1058.99   55.29
   8   2   3 1082.49   51.89
   2 -10   3 1062.69   54.39
   8   2   3 1124.79   53.99
   2 -10   3 1018.60   66.99
 -10   8   3 1110.19   59.79
 -10   8   3 1141.19   54.09
   8   2   3 1107.49   52.19
   2 -10   3 1131.19   54.99
   2 -10   3  986.30   54.19
   7  -8  -3   20.00    6.40
  -8   1  -3   13.70    4.60
   7  -8  -3   16.00    4.40
  -8   1  -3   12.40    2.90
   7  -8  -3    8.70    5.00
   1   7  -3   11.70    3.00
   7  -8  -3  -14.50   12.20
   1   7  -3    5.30    7.20
  -8   1  -3   28.10   11.30
   1   7  -3   13.20    7.90
   1   7  -3    7.60    6.30
   1   7  -3   22.90    6.50
   1   7  -3   30.50    7.60
   7  -8  -3   11.40    5.90
  -8   1  -3    8.90    4.10
  -8   1  -3   12.40    5.20
   7  -8  -3   38.20   13.50
   7  -8  -3   18.20    5.20
  -8   1  -3   -6.00   11.90
   1   7  -3    8.80    5.20
  -1  -7   3   16.30    8.30
   8  -1   3   12.60    5.80
   8  -1   3   13.20    6.20
  -1  -7   3    9.50    6.00
   8  -1   3   16.90    5.30
   8  -1   3   20.40    5.80
  -7   8   3   13.00    5.10
   8  -1   3    9.90    4.60
  -7   8   3   11.40   11.10
  -1  -7   3   10.70    5.90
  -7   8   3   22.00    6.70
  -7   8   3   13.30    4.80
  -1  -7   3   15.40    6.40
  -7   8   3   10.00    5.90
   8  -1   3   -5.60   13.30
  -1  -7   3   -2.50   15.20
  -1  -7   3    9.90    5.60
  -7   8   3    0.20   12.40
  -7   8   3   17.50    7.40
  -1  -7   3   14.50    6.80
  -7   8   3   11.10    6.90
   4  -8  -3 2322.67   99.99
   4   4  -3 2258.57  101.89
  -8   4  -3 2365.66  100.19
  -8   4  -3 2347.97  100.09
   4   4  -3 2172.48  101.99
  -8   4  -3 2385.36  101.29
   4  -8  -3 2394.26  102.09
   4  -8  -3 2232.08  109.59
   4   4  -3 2173.18   99.39
   4  -8  -3 2252.17  100.69
   4  -8  -3 2311.57  100.79
   4   4  -3 2238.38  103.49
  -8   4  -3 2528.35  100.69
  -8   4  -3 2330.77  111.79
  -8   4  -3 2242.18  104.29
   4   4  -3 2121.59  112.89
   4   4  -3 2242.28  101.99
   4  -8  -3 2320.17  108.79
   4   4  -3 2226.88  101.99
   4  -8  -3 2092.39  101.69
  -4   8   3 2420.26  102.29
  -4   8   3 2296.17  101.59
   8  -4   3 2381.36  102.09
  -4   8   3 2415.86  101.89
  -4   8   3 2305.87  109.89
   8  -4   3 2350.36  102.19
  -4  -4   3 2086.69  100.59
  -4   8   3 2351.66  102.69
  -4   8   3 2276.17  101.29
  -4   8   3 2323.97  101.29
  -4  -4   3 2188.38  103.59
   8  -4   3 2213.88  100.79
   8  -4   3 2434.26  102.49
  -4   8   3 2326.37  101.29
  -4  -4   3 2253.77  111.39
  -4  -4   3 2267.27  101.59
  -4  -4   3 2247.68  102.89
   8  -4   3 2318.67  100.39
   8  -4   3 2367.06  101.39
  -4  -4   3 2272.87  102.69
   8  -4   3 2432.86  101.29
   7   1  -3   20.90    6.40
   1  -8  -3   17.30    5.50
  -8   7  -3    4.40    4.20
   1  -8  -3   20.60    5.70
   7   1  -3   51.29   17.60
  -8   7  -3   11.20    5.70
  -8   7  -3    5.30    5.30
   7   1  -3   20.50    7.10
   7   1  -3   13.70    4.20
   1  -8  -3    7.90    4.50
  -8   7  -3   15.50    5.40
   1  -8  -3   13.10    4.40
  -8   7  -3   12.70    5.80
   1  -8  -3   18.70   12.40
   1  -8  -3   14.90    8.30
  -8   7  -3   11.80    5.60
   7   1  -3   19.50    5.60
   1  -8  -3    9.50    4.70
  -8   7  -3   27.80   14.30
   1  -8  -3   21.10   12.30
   7   1  -3   10.30    7.30
  -7  -1   3   16.40    4.00
  -7  -1   3   22.70    6.80
   8  -7   3   20.10    5.70
  -1   8   3   11.60    5.30
  -1   8   3   16.60    6.40
  -1   8   3   12.70    4.60
   8  -7   3   12.00    5.70
  -1   8   3    5.10    4.20
  -1   8   3   -0.70   12.10
  -1   8   3    7.30    4.20
  -7  -1   3    9.60    7.20
  -1   8   3   10.10    5.90
  -7  -1   3    6.20    5.20
   8  -7   3   10.50    5.70
  -1   8   3   19.00    5.90
   8  -7   3   16.40    5.70
  -7  -1   3   23.20   13.40
   8  -7   3   11.70    5.00
  -2  -8  -3 1152.88   54.59
  10  -2  -3 1090.49   56.29
  -8  10  -3 1145.29   54.49
  -2  -8  -3 1184.78   52.09
  -2  -8  -3 1134.39   61.89
  10  -2  -3 1151.98   70.49
  10  -2  -3 1148.89   54.59
  -8  10  -3 1091.49   54.29
  -8  10  -3 1203.78   56.39
  10  -2  -3 1044.20   50.29
  10  -2  -3 1065.89   53.59
  -2  -8  -3 1189.68   65.19
  -8  10  -3 1132.59   53.59
  10  -2  -3 1108.49   54.79
  -8  10  -3 1173.88   55.59
  -2  -8  -3 1185.78   51.49
  10  -2  -3 1133.99   56.69
   2   8   3 1123.49   54.59
 -10   2   3 1089.39   54.79
   8 -10   3 1158.78   54.99
   8 -10   3 1163.18   55.49
 -10   2   3 1082.29   60.79
   2   8   3 1146.09   53.79
   2   8   3 1236.68   55.69
 -10   2   3 1099.59   55.79
   8 -10   3 1125.49   52.19
   2   8   3 1208.88   56.39
   2   8   3 1159.38   53.69
   2   8   3 1127.29   49.50
   2   8   3 1115.89   62.79
   8 -10   3 1174.88   55.29
   2   8   3 1165.18   54.39
   8 -10   3 1103.09   55.39
   2   8   3 1003.70   63.59
 -10   2   3 1015.20   54.39
 -10   2   3  979.50   55.99
   8 -10   3 1012.70   56.79
 -10   2   3 1069.99   54.79
  -5  -8  -3   37.10    8.50
  -8  13  -3   43.50   14.30
  -5  -8  -3   53.79   22.90
  -5  -8  -3   42.10   10.20
  -8  13  -3   28.60   10.00
  -8  13  -3   44.70    9.00
  13  -5  -3   39.10    5.80
  -5  -8  -3   42.60   16.10
  13  -5  -3   34.30   16.20
  13  -5  -3   42.00   12.60
  13  -5  -3   45.40   10.40
  13  -5  -3    7.60   11.40
  -8  13  -3   70.99   14.80
  -8  13  -3   28.30   13.90
  13  -5  -3    2.90   25.80
  13  -5  -3   47.40   11.60
   8 -13   3   32.40   10.10
 -13   5   3   57.19   15.70
 -13   5   3   46.90   11.90
   8 -13   3   39.50   12.00
 -13   5   3   23.80   11.20
   5   8   3   47.40   11.40
   5   8   3  -47.80   39.40
   5   8   3   26.10    9.20
   5   8   3   37.20   13.00
   8 -13   3   30.60    8.30
   8 -13   3   30.30   10.90
   5   8   3   41.60   12.10
 -13   5   3   55.29   11.40
   8 -13   3   50.39   12.50
 -13   5   3   20.50    7.80
 -13   5   3   18.30   16.70
   5   8   3   54.09   10.30
  16  -8  -3  140.39   14.10
  16  -8  -3   65.89   38.10
  -8  -8  -3  103.09   32.30
  -8  -8  -3  176.88   23.70
  -8  16  -3  178.58   19.70
  -8  16  -3  181.48   25.00
  -8  16  -3  129.99   19.50
  -8  -8  -3  188.38   28.90
  -8  -8  -3  213.18   21.80
  16  -8  -3  222.48   25.40
  16  -8  -3  188.48   24.10
  -8  -8  -3  152.18   18.80
   8 -16   3  173.68   22.60
   8 -16   3  204.88   20.70
 -16   8   3  196.58   31.00
   8   8   3  182.78   25.80
   8   8   3  193.48   21.20
   8 -16   3  193.68   22.60
 -16   8   3  183.68   24.70
 -16   8   3  174.08   22.10
   8   8   3  141.39   20.00
 -16   8   3  150.38   22.20
 -16   8   3  179.28   22.60
   8 -16   3  172.28   22.40
  -9  -6  -3   13.30   10.70
  15  -9  -3    6.90    5.60
  -9  -6  -3    8.30    9.90
  -6  15  -3   -0.10    8.10
  -9  -6  -3   17.50   23.70
  -9  -6  -3   -2.60   15.80
  15  -9  -3   -5.20   22.00
  15  -9  -3   17.10   14.10
  15  -9  -3   31.60   10.70
  15  -9  -3    3.10    9.90
  -9  -6  -3   23.20   12.10
  -6  15  -3    9.20   11.60
 -15   9   3   -8.40   12.90
 -15   9   3   18.10    9.50
   6 -15   3   -2.50   13.10
   9   6   3    3.10    9.00
   6 -15   3   -2.10   13.60
   6 -15   3    5.20   12.10
 -15   9   3    1.20   13.00
   6 -15   3    7.40   11.60
 -15   9   3   26.50   14.00
   9   6   3    5.00   10.50
   6 -15   3    6.00   39.70
   9   6   3   16.70   14.80
   9   6   3   22.20   11.30
  -9  -3  -3   60.79   10.30
  12  -9  -3   75.69   21.20
  -3  12  -3   63.39   12.30
  -3  12  -3   73.09   13.10
  12  -9  -3   77.59   12.50
  -9  -3  -3   49.50   20.80
  -3  12  -3   34.40   12.10
  12  -9  -3   62.39   11.90
  -3  12  -3   78.59   15.50
  -3  12  -3   76.09    9.20
  12  -9  -3   66.59    9.50
  12  -9  -3   25.20   13.40
  -9  -3  -3   80.79   16.10
  12  -9  -3   49.60   12.10
  12  -9  -3   48.40   11.40
  -3  12  -3   38.90   12.70
  -9  -3  -3   52.59    9.10
  -9  -3  -3   57.09   10.20
   3 -12   3   54.09   10.60
 -12   9   3   63.29   15.70
   9   3   3   65.09   12.20
 -12   9   3   73.29   12.40
   9   3   3   88.49   12.80
 -12   9   3   56.59   10.40
   3 -12   3   92.89   25.00
   3 -12   3   47.20   26.60
   9   3   3   63.39   10.10
   9   3   3  140.99   28.90
   3 -12   3   52.79   11.40
   3 -12   3   69.49    9.40
   9   3   3   94.69   14.30
 -12   9   3   69.99   12.90
 -12   9   3   72.09   11.50
   3 -12   3   60.69   12.80
   3 -12   3   93.39   15.10
   9   3   3   84.29   12.20
   0   9  -3   -5.50    7.90
  -9   0  -3   -0.50    1.90
   0   9  -3    3.90    7.50
   0   9  -3    2.80    5.00
   9  -9  -3   -8.30    6.10
   9  -9  -3    4.50    8.90
  -9   0  -3   -2.00    4.80
   9  -9  -3    4.30    4.80
  -9   0  -3   -8.70   13.50
  -9   0  -3   10.90   18.20
   9  -9  -3  -11.10    6.40
   0   9  -3   -0.20    3.20
   9  -9  -3   -7.60    6.70
   9  -9  -3   16.30   15.10
   9  -9  -3   -1.60    5.00
   0   9  -3    0.90    6.90
   0   9  -3   -4.10    8.60
  -9   0  -3   -0.40    5.30
   0   9  -3    6.10    9.20
  -9   0  -3    4.40    5.40
   9   0   3   -2.10    4.70
   0  -9   3    0.40    7.70
   0  -9   3    1.80    6.80
  -9   9   3   -0.10    6.60
   9   0   3   10.50    7.60
  -9   9   3   -7.40    5.70
   0  -9   3   -2.70    7.30
   0  -9   3  -10.10    9.60
   0  -9   3   -4.00    5.80
   0  -9   3  -10.20   17.40
  -9   9   3  -13.90    7.30
   9   0   3    3.50   17.20
  -9   9   3   16.20    8.40
  -9   9   3    7.90    7.90
   0  -9   3   -2.20    5.50
   9   0   3   -4.10    4.40
  -9   9   3    4.80    5.30
   9   0   3    6.10    7.30
   0  -9   3    0.70    7.00
   9   0   3    4.90    5.90
   3   6  -3   11.20    6.80
   6  -9  -3    4.10    4.40
   6  -9  -3   17.00    5.80
  -9   3  -3   10.70    5.10
   3   6  -3    9.30    5.90
   6  -9  -3   17.00   12.60
   3   6  -3    5.50    7.00
  -9   3  -3   -2.40   12.90
   6  -9  -3    7.90    4.50
  -9   3  -3    5.30    4.20
  -9   3  -3   10.50    5.00
  -9   3  -3   17.70    9.40
   6  -9  -3    8.70    6.20
   3   6  -3   10.60   14.80
  -9   3  -3   16.20    4.40
   6  -9  -3    8.30   12.10
   3   6  -3    6.40    8.10
  -9   3  -3   13.80    5.30
   6  -9  -3    2.30    6.60
  -3  -6   3    3.20    4.70
  -3  -6   3    8.70    5.80
  -6   9   3    1.40   12.80
   9  -3   3   15.60    5.20
   9  -3   3    5.40    7.70
  -6   9   3    2.80    6.40
   9  -3   3    9.20    6.10
  -3  -6   3   12.60    6.30
  -6   9   3   17.90    6.10
  -3  -6   3    0.70   14.50
  -3  -6   3   17.40    5.90
   9  -3   3    8.40    4.20
  -6   9   3    2.90    6.10
  -6   9   3    3.50    4.10
  -6   9   3    4.90    4.60
  -3  -6   3   10.70    8.30
   9  -3   3   14.80   13.70
  -6   9   3   10.30    6.00
   9  -3   3    5.80    4.70
   9  -3   3   11.70    6.80
  -3  -6   3    5.40    6.10
   6   3  -3   -1.90    5.20
   6   3  -3   11.40   16.00
  -9   6  -3    4.90    4.70
  -9   6  -3   17.70   13.30
  -9   6  -3    8.10    6.80
  -9   6  -3    6.50    4.30
   6   3  -3    8.50    4.60
   3  -9  -3    4.90    4.10
   3  -9  -3   17.00   11.50
   6   3  -3   -1.50    7.30
   3  -9  -3   -2.30    4.40
   3  -9  -3    0.20    4.30
   6   3  -3    7.80    4.80
  -9   6  -3    0.30    5.10
  -9   6  -3    1.20    5.30
   6   3  -3    4.50    6.40
   6   3  -3    3.50    4.70
   3  -9  -3    2.30   10.30
   3  -9  -3    5.00    5.50
  -9   6  -3    3.50    5.10
   3  -9  -3   24.10   12.10
  -3   9   3  -10.90   12.10
  -3   9   3    2.30    4.90
  -3   9   3    5.40    6.60
  -6  -3   3   -0.60    5.30
  -6  -3   3    4.20    4.30
   9  -6   3    0.70    4.40
   9  -6   3    9.70    6.00
  -6  -3   3    8.90    6.80
  -6  -3   3    7.70    6.60
   9  -6   3    6.00    5.40
  -6  -3   3    7.90    5.30
  -6  -3   3    2.60    7.00
  -3   9   3    3.20    4.80
  -3   9   3    6.10    6.00
  -3   9   3    5.40    5.40
  -3   9   3    7.20    5.10
   9  -6   3    5.60    6.00
  -3   9   3   -0.40    5.70
   9  -6   3    5.30    7.70
   9  -6   3    9.50    4.90
   0  -9  -3    3.30    4.50
   0  -9  -3    1.70   12.90
   9   0  -3    0.60    7.00
   9   0  -3    1.30    5.10
   9   0  -3   -9.30    5.80
   9   0  -3   -2.50    3.80
  -9   9  -3    2.10    5.00
  -9   9  -3    1.70    4.50
  -9   9  -3   -8.00    6.50
  -9   9  -3    4.90   15.80
   0  -9  -3    1.60    6.80
   0  -9  -3    4.70    5.80
   9   0  -3   23.30   20.30
  -9   9  -3    0.30    7.00
  -9   9  -3    6.80    7.40
   9   0  -3    3.90    8.50
  -9   9  -3    4.40    6.70
   9   0  -3   -3.50    9.00
  -9   9  -3   -1.40    6.80
   0  -9  -3    8.50   13.50
   0  -9  -3    4.30    6.40
  -9   0   3   -1.10    8.70
   9  -9   3    6.90    5.70
  -9   0   3   -0.50    6.60
   9  -9   3    8.20    6.90
   0   9   3    3.90    5.90
   0   9   3   -0.40    5.80
   9  -9   3    0.10    5.50
   0   9   3   18.30   14.80
   0   9   3   -1.40    6.90
   9  -9   3    2.70    6.50
   0   9   3   10.60    7.40
   9  -9   3   -6.90    6.60
  -9   0   3    5.20    5.80
   0   9   3    4.90    7.90
  -9   0   3  -14.10   13.50
   9  -9   3    7.20    8.30
   0   9   3   -0.30    4.10
   0   9   3   -3.90    4.80
  -9   0   3    1.50    6.50
  -3  -9  -3   44.70   10.80
  12  -3  -3   38.80   13.80
  -9  12  -3   26.10   12.60
  -9  12  -3   47.00    9.10
  12  -3  -3   31.00   24.10
  -3  -9  -3   43.00    9.40
  -9  12  -3   65.89   13.80
  -3  -9  -3   55.69    8.70
  -3  -9  -3   24.20   18.20
  -3  -9  -3   29.40   16.70
  -9  12  -3   35.00    8.80
  12  -3  -3   57.29   10.20
  12  -3  -3   34.00   13.30
  12  -3  -3   43.80    6.40
  12  -3  -3   68.69   12.00
  -9  12  -3   36.40   11.60
  12  -3  -3   23.80   10.30
   3   9   3   37.50   10.40
 -12   3   3   24.80   16.50
   9 -12   3   28.50   10.80
 -12   3   3   56.29   12.70
 -12   3   3   39.00   11.60
   9 -12   3   34.90    8.10
   3   9   3   55.69   11.00
 -12   3   3   57.29   11.10
   3   9   3   55.89   10.20
   9 -12   3   35.30   10.20
   3   9   3   49.90   11.70
 -12   3   3   33.50    9.80
   3   9   3   38.10    4.60
   3   9   3  100.39   24.30
   3   9   3   32.10   12.20
   3   9   3   30.30   10.00
   9 -12   3   41.00   10.80
   9 -12   3   47.00   11.20
  -9  15  -3   -6.20   11.30
  -9  15  -3    9.50    9.40
  15  -6  -3  -27.60   30.10
  -6  -9  -3  -10.30   10.40
  15  -6  -3   19.40   13.00
  15  -6  -3   -9.60   22.00
  -6  -9  -3   10.40   12.30
  -6  -9  -3   27.90   20.80
  15  -6  -3    4.10    5.60
  -6  -9  -3   13.10   24.20
  -6  -9  -3    1.90    9.20
   6   9   3   23.80   11.40
   9 -15   3   -8.60   13.70
   9 -15   3   12.50   12.30
   6   9   3   30.60   15.40
   9 -15   3    5.00   12.10
 -15   6   3    1.00   19.70
   6   9   3   30.80   10.70
 -15   6   3   14.70   14.10
 -15   6   3   22.50   12.80
   9 -15   3    9.70   11.20
 -15   6   3  -23.20   17.90
   6   9   3   11.30   11.10
   9 -15   3   -7.60    9.60
 -15   6   3   10.40   14.70
  18  -9  -3  117.59   24.10
  -9  18  -3  177.18   30.30
  -9  -9  -3  146.09   20.10
  18  -9  -3   94.29   47.80
  -9  18  -3  110.59   17.70
  -9  -9  -3   89.59   39.10
  -9  18  -3   84.09   21.10
  -9  -9  -3  168.38   31.90
   9 -18   3  131.39   22.90
   9 -18   3  106.69   22.20
 -18   9   3  171.08   28.00
 -18   9   3  126.99   21.10
   9 -18   3  152.58   25.50
   9   9   3  137.29   21.10
   9   9   3  123.99   27.00
 -18   9   3   54.19   34.00
   9   9   3   86.79   20.70
  17 -10  -3   58.39   18.50
  17 -10  -3   49.60   19.70
 -10  -7  -3   49.99   14.60
  17 -10  -3   37.70    9.00
  -7  17  -3   34.90   15.10
  -7  17  -3   50.89   12.20
 -10  -7  -3   29.10   22.70
 -10  -7  -3   78.19   33.60
 -17  10   3   46.90   19.40
  10   7   3   61.29   15.20
 -17  10   3   32.80   13.70
  10   7   3   66.69   23.00
   7 -17   3   49.80   17.70
  10   7   3    7.90   15.30
   7 -17   3   31.10   16.50
 -17  10   3    7.40   16.60
   7 -17   3   50.59   15.60
 -17  10   3   74.29   32.10
 -10  -4  -3  243.78   21.90
  14 -10  -3  216.28   19.90
 -10  -4  -3  251.07   21.90
  14 -10  -3  209.28   31.90
 -10  -4  -3  280.97   37.60
 -10  -4  -3  200.08   20.00
  14 -10  -3  210.58   21.20
 -10  -4  -3  205.28   22.00
  -4  14  -3  220.58   26.50
  -4  14  -3  200.68   16.80
  -4  14  -3  246.88   23.70
  14 -10  -3  205.88   25.00
 -14  10   3  211.38   22.50
 -14  10   3  204.38   24.00
   4 -14   3  217.68   25.00
  10   4   3  211.78   21.10
   4 -14   3  256.97   41.60
  10   4   3  237.48   22.80
  10   4   3  230.58   22.10
   4 -14   3  295.77   26.70
   4 -14   3  220.58   24.60
  10   4   3  196.38   25.10
  11 -10  -3  -10.00    9.40
 -10  -1  -3   -2.90    7.50
  -1  11  -3   33.30   12.00
  -1  11  -3    4.70    8.80
  -1  11  -3    4.20    4.40
  -1  11  -3   16.00   10.10
  -1  11  -3    2.50   10.10
  11 -10  -3   -1.20    6.80
  11 -10  -3   10.40    8.80
 -10  -1  -3   15.70    6.90
  -1  11  -3  -15.60   11.50
  -1  11  -3    7.40    7.80
 -10  -1  -3   35.50   17.70
  11 -10  -3   17.80   11.00
  11 -10  -3   -5.20   16.60
  11 -10  -3   -9.60    8.30
 -10  -1  -3    7.30   15.30
 -10  -1  -3    8.40    6.70
 -11  10   3    8.40    9.40
   1 -11   3    4.10    9.10
  10   1   3    4.80    7.30
   1 -11   3   12.90    8.80
 -11  10   3    5.60    6.80
  10   1   3   -9.50    9.50
   1 -11   3   10.50    9.30
  10   1   3    6.10    5.70
   1 -11   3   13.00    8.30
   1 -11   3  -44.60   21.80
 -11  10   3    6.10   10.50
  10   1   3    9.60    8.90
 -11  10   3   -3.60    8.00
  10   1   3    4.00   22.90
   1 -11   3   -3.90   10.30
  10   1   3    7.20    7.70
   1 -11   3   17.30    9.30
 -11  10   3   -1.40    7.00
   2   8  -3 1062.29   49.30
   8 -10  -3 1103.69   52.89
   2   8  -3 1101.69   54.79
   8 -10  -3 1125.49   54.49
   2   8  -3 1111.79   56.39
   2   8  -3 1132.99   53.99
   8 -10  -3 1124.89   52.99
   8 -10  -3 1097.39   63.39
   2   8  -3 1059.89   55.79
   8 -10  -3 1091.19   53.79
 -10   2  -3 1140.69   60.49
 -10   2  -3  974.10   53.79
 -10   2  -3 1126.49   49.20
   2   8  -3 1064.29   52.69
   8 -10  -3 1279.77   68.39
 -10   2  -3 1142.09   64.89
   8 -10  -3 1065.09   52.99
 -10   2  -3 1157.48   51.79
   8 -10  -3 1112.99   51.19
   2   8  -3 1058.99   54.39
 -10   2  -3 1056.39   51.99
  -8  10   3 1114.19   53.89
  10  -2   3 1056.49   53.59
  -8  10   3 1124.19   55.99
  -8  10   3 1146.39   54.19
  10  -2   3 1104.19   52.59
  10  -2   3 1124.39   55.69
  -8  10   3 1085.99   53.99
  -2  -8   3 1075.49   56.99
  10  -2   3 1097.79   53.59
  -8  10   3 1074.19   53.99
  -2  -8   3 1129.19   55.19
  -2  -8   3 1063.49   53.49
  10  -2   3 1110.09   54.39
  -2  -8   3 1079.89   54.89
  -2  -8   3 1174.08   53.29
  -8  10   3 1080.19   52.99
  -2  -8   3 1057.29   57.89
  -8  10   3 1067.39   62.39
  -2  -8   3 1043.40   63.79
  10  -2   3 1151.88   64.69
  10  -2   3 1098.89   52.39
   5 -10  -3   11.40    5.80
   5 -10  -3   17.30    5.70
 -10   5  -3   18.40    5.70
 -10   5  -3   24.90    6.50
   5   5  -3   33.40   17.90
   5 -10  -3   15.80    6.30
   5   5  -3   16.70    6.10
   5   5  -3   29.90    7.90
   5 -10  -3   10.40    5.60
 -10   5  -3   47.60   17.70
 -10   5  -3   13.00    6.30
   5   5  -3   13.60    7.20
   5 -10  -3    3.00    6.50
   5   5  -3   13.90    4.10
   5   5  -3   12.30    6.90
   5   5  -3   17.40    8.60
 -10   5  -3   15.70    6.00
   5 -10  -3   14.50   13.90
   5   5  -3    6.30    5.50
 -10   5  -3   11.80    8.60
   5 -10  -3   17.50   13.20
 -10   5  -3   10.60    5.10
  -5  10   3   21.60   15.90
  -5  -5   3    8.90    6.10
  -5  10   3   20.10    6.50
  -5  10   3   -1.50    6.90
  -5  10   3    3.60    7.30
  -5  10   3    0.60    6.30
  -5  10   3    2.20    6.80
  -5  -5   3   12.30    6.00
  -5  -5   3   26.40    7.90
  10  -5   3   20.80    5.80
  10  -5   3   13.70    5.50
  -5  -5   3   22.20    7.70
  -5  -5   3    8.90    5.70
  10  -5   3    8.20    7.40
  10  -5   3   11.20    5.70
  -5  10   3   15.30    5.90
  10  -5   3    7.60    4.90
  -5  -5   3   16.40   10.20
  10  -5   3   17.10    7.70
  10  -5   3   10.20    9.10
  -5  10   3    7.30    6.50
   8   2  -3 1240.28   54.79
   8   2  -3 1185.78   56.99
   2 -10  -3 1058.39   64.49
 -10   8  -3 1145.49   55.69
   8   2  -3 1219.38   56.79
 -10   8  -3 1276.07   69.89
   2 -10  -3 1175.38   53.89
   8   2  -3 1230.98   72.99
   2 -10  -3 1152.38   65.09
   2 -10  -3 1184.18   54.99
   8   2  -3 1070.49   54.59
   2 -10  -3 1187.78   55.99
 -10   8  -3 1152.78   55.39
   8   2  -3 1188.18   57.79
   8   2  -3 1246.38   59.99
   2 -10  -3 1176.98   56.79
 -10   8  -3 1213.58   56.59
 -10   8  -3 1130.99   56.29
 -10   8  -3 1165.08   55.79
 -10   8  -3 1107.59   55.29
  10  -8   3 1213.28   56.79
  -2  10   3 1173.68   58.29
  -8  -2   3 1201.08   57.59
  -2  10   3 1132.99   55.89
  10  -8   3 1144.19   55.99
  10  -8   3 1169.98   57.39
  -2  10   3 1134.89   56.19
  -8  -2   3 1239.18   58.19
  -2  10   3 1143.59   64.99
  -2  10   3 1170.68   55.59
  10  -8   3 1191.88   55.59
  -2  10   3 1201.98   57.39
  -8  -2   3 1169.18   55.49
  -8  -2   3 1139.89   53.59
  -2  10   3 1120.79   53.69
  10  -8   3 1138.39   56.39
  -2  10   3 1121.29   56.19
  11  -1  -3   13.90   11.90
 -10  11  -3   28.80   10.10
  11  -1  -3   13.80    7.10
  -1 -10  -3    8.30   14.00
  -1 -10  -3    0.40   15.60
  11  -1  -3   14.20   10.30
  -1 -10  -3   31.00    9.80
 -10  11  -3   -0.80    6.60
  11  -1  -3    6.70    9.10
 -10  11  -3   21.00    9.60
  -1 -10  -3   13.20    6.60
 -10  11  -3    9.10    9.10
  11  -1  -3    9.90    9.20
  11  -1  -3  -10.60   21.00
  11  -1  -3    8.70    5.20
 -10  11  -3   -1.70    9.40
 -10  11  -3    4.50    8.30
  -1 -10  -3    2.70    6.70
  -1 -10  -3   10.70    8.00
   1  10   3   10.50    8.00
 -11   1   3    7.70    7.40
   1  10   3   11.60    6.90
  10 -11   3  -12.00   15.10
  10 -11   3    6.70    8.70
  10 -11   3   11.20    8.30
 -11   1   3   -4.70    6.80
   1  10   3   -4.90    9.00
   1  10   3    3.90    6.90
   1  10   3    4.00    7.80
  10 -11   3    6.50    7.20
  10 -11   3    9.90    9.90
   1  10   3    2.30    9.80
   1  10   3   51.99   22.30
  10 -11   3  -11.30   11.80
  10 -11   3    6.50    7.90
 -11   1   3    6.20    9.10
 -11   1   3  -14.80   16.60
 -11   1   3   -4.10    7.50
   1  10   3   15.30   20.10
   1  10   3    5.10    4.70
 -11   1   3   -7.10   15.80
 -10  14  -3  200.98   21.70
  14  -4  -3  236.58   22.50
  14  -4  -3  200.68   15.10
  -4 -10  -3  232.98   22.80
  -4 -10  -3  209.08   19.30
  -4 -10  -3  219.08   21.80
 -10  14  -3  245.38   28.10
  -4 -10  -3  260.37   32.70
 -10  14  -3  237.68   20.60
  14  -4  -3  225.88   27.10
 -14   4   3  192.18   24.80
   4  10   3  205.38   21.10
  10 -14   3  191.68   19.10
  10 -14   3  296.77   27.00
 -14   4   3  158.98   26.60
  10 -14   3  189.28   21.70
  10 -14   3  154.78   27.70
 -14   4   3  200.88   25.10
   4  10   3  197.18   22.40
   4  10   3  259.87   27.70
   4  10   3  191.88   25.90
 -14   4   3  232.48   23.20
 -14   4   3  220.48   24.20
  10 -14   3  207.68   23.80
  -7 -10  -3   93.79   29.10
  -7 -10  -3   27.80   32.50
  17  -7  -3   91.59   40.00
  17  -7  -3   32.80    9.30
  17  -7  -3   44.90   15.60
  -7 -10  -3   67.29   14.90
 -10  17  -3   47.40   14.60
 -10  17  -3   85.19   19.20
  17  -7  -3   12.20   17.80
 -10  17  -3   52.59   22.00
 -17   7   3   76.09   27.30
 -17   7   3   63.79   16.70
   7  10   3   70.29   15.90
   7  10   3   85.09   24.40
  10 -17   3   41.40   18.00
   7  10   3   54.19   16.80
  10 -17   3   56.19   17.40
 -17   7   3   56.89   17.90
  10 -17   3   47.20   17.60
 -11  -5  -3   51.89   30.00
  -5  16  -3    1.10   18.60
  -5  16  -3   28.70    9.90
 -11  -5  -3   31.30   14.90
 -11  -5  -3   39.20   13.90
 -11  -5  -3   28.60   15.50
  16 -11  -3   13.30   15.70
  -5  16  -3   13.00   13.50
  16 -11  -3   33.90   27.30
  16 -11  -3   23.20   12.80
 -11  -5  -3   35.00   14.60
 -16  11   3   45.20   17.60
  11   5   3   -2.40   13.10
   5 -16   3   34.30   18.90
   5 -16   3   20.40   15.80
   5 -16   3    2.30   43.30
  11   5   3   16.30   16.80
   5 -16   3   70.89   15.90
  11   5   3   33.50   11.70
   5 -16   3   31.40   26.70
 -16  11   3   14.40   11.60
 -16  11   3   22.20   17.20
 -16  11   3   36.80   18.30
  -2  13  -3   68.79   13.40
 -11  -2  -3   94.09   13.10
 -11  -2  -3   86.69   13.30
  13 -11  -3   71.19   18.20
 -11  -2  -3   97.09   24.20
  13 -11  -3   61.79   13.40
 -11  -2  -3  109.89   13.70
  -2  13  -3   81.39   17.80
 -11  -2  -3   96.19   24.90
  13 -11  -3  145.29   28.40
  13 -11  -3   75.59   11.90
  -2  13  -3   63.49    9.10
  13 -11  -3   99.29   15.70
   2 -13   3   21.80   29.40
   2 -13   3   77.29   14.00
 -13  11   3  104.99   15.20
   2 -13   3   96.59   16.50
  11   2   3   69.89   14.70
 -13  11   3  117.59   16.30
   2 -13   3   69.49   13.70
  11   2   3   92.49   14.80
  11   2   3   61.69   15.30
   2 -13   3  102.09   16.90
 -13  11   3   76.99   16.90
 -13  11   3   97.49   18.40
  11   2   3   93.09   14.10
   2 -13   3   78.69   24.10
 -11   1  -3   44.50   19.60
  10 -11  -3    8.70    7.80
   1  10  -3   -2.70    7.10
 -11   1  -3   11.60    7.40
  10 -11  -3    8.50    6.90
  10 -11  -3    2.20   11.20
   1  10  -3    3.20   10.10
   1  10  -3   25.50   12.00
   1  10  -3    5.00    9.70
 -11   1  -3   -1.90   15.60
   1  10  -3    8.30   10.90
  10 -11  -3    3.40    7.00
 -11   1  -3    1.90    3.40
  10 -11  -3   -3.20    9.40
  10 -11  -3   -2.70   17.00
 -11   1  -3   12.50    7.20
 -11   1  -3    3.00    6.00
   1  10  -3    3.40    4.30
   1  10  -3  -12.70    9.40
  11  -1   3   11.40    9.20
 -10  11   3   -3.80    8.20
 -10  11   3   -8.50    9.40
  -1 -10   3    8.00    7.50
  11  -1   3   13.30    7.60
 -10  11   3    9.10   19.80
  -1 -10   3   -5.90    7.60
  -1 -10   3    6.80    7.60
  11  -1   3   22.70   12.70
  11  -1   3    9.00    7.80
  11  -1   3   -5.90   10.70
  11  -1   3    6.60    7.80
 -10  11   3    2.00    5.90
  11  -1   3    1.30   22.40
  -1 -10   3    9.30    8.70
 -10  11   3    7.50    9.90
 -10  11   3    2.10    8.30
  -1 -10   3   22.20   10.00
  -1 -10   3  -12.70   19.20
 -10  11   3    3.80   11.00
  -1 -10   3    2.30   10.20
   7 -11  -3  124.29   12.50
   4   7  -3  112.99   13.90
   4   7  -3   92.89   23.30
   4   7  -3   71.49   13.20
 -11   4  -3  104.99   12.40
   7 -11  -3  104.79   13.20
   4   7  -3   82.89   12.90
   7 -11  -3   99.29   13.00
 -11   4  -3  107.39   12.70
 -11   4  -3   92.69   10.60
 -11   4  -3  123.29   18.70
   4   7  -3  123.99   16.10
   7 -11  -3  142.69   16.10
   7 -11  -3  112.19   13.30
   7 -11  -3  114.79   22.50
   4   7  -3  116.69   15.90
   4   7  -3   95.99   12.60
 -11   4  -3  120.19   24.30
   7 -11  -3  159.38   23.80
 -11   4  -3  115.19   13.20
  11  -4   3  151.08   15.70
  -4  -7   3  125.39   15.40
  -7  11   3  121.99   13.10
  -4  -7   3   91.09   13.60
  11  -4   3   95.49   13.80
  -4  -7   3  135.69   23.10
  -7  11   3  107.99   14.20
  -4  -7   3  101.99   13.60
  -7  11   3   89.69   12.70
  11  -4   3  104.19   12.40
  11  -4   3  111.69   13.00
  -7  11   3  125.69   22.90
  -7  11   3  112.49   14.00
  11  -4   3  135.59   16.40
  -4  -7   3   90.99   11.30
  -7  11   3  103.19   13.10
  -4  -7   3  108.29   14.40
  -7  11   3  124.19   15.10
   7   4  -3  116.19   15.60
   7   4  -3  116.59   13.10
 -11   7  -3  116.99   12.90
   7   4  -3  122.49   14.30
   7   4  -3  102.89   13.50
 -11   7  -3  159.98   25.90
   7   4  -3  106.29   15.00
   4 -11  -3  122.99   13.10
   4 -11  -3  114.49   12.70
 -11   7  -3  138.09   15.10
 -11   7  -3  130.19   13.40
 -11   7  -3  132.79   16.10
   4 -11  -3  129.09   13.50
 -11   7  -3  127.19   14.70
   4 -11  -3  142.19   22.60
   7   4  -3  151.38   27.90
 -11   7  -3  128.09   14.60
   4 -11  -3  149.99   19.40
   7   4  -3  124.39   16.00
   4 -11  -3  153.18   15.60
  11  -7   3  146.19   14.40
  -7  -4   3  109.09   12.90
  -4  11   3  127.19   15.90
  -4  11   3  125.39   13.10
  -4  11   3  113.89   13.20
  -7  -4   3  123.09   12.20
  -4  11   3  125.49   22.50
  11  -7   3  126.49   13.80
  -4  11   3  142.49   14.50
  11  -7   3  131.99   15.60
  11  -7   3  132.09   16.50
  -7  -4   3  126.69   16.20
  -7  -4   3  132.29   15.60
  -4  11   3  132.39   16.20
  -4  11   3  127.19   15.70
  -4  11   3  120.89   13.50
  -7  -4   3  143.59   16.50
  11  -7   3  111.39   14.00
  11  -7   3  137.29   16.00
   1 -11  -3    4.70   16.40
   1 -11  -3   16.80    9.20
  10   1  -3   -2.10   11.00
 -11  10  -3    6.00    8.90
   1 -11  -3    5.30    7.00
  10   1  -3    1.80    6.10
  10   1  -3    3.50    8.20
  10   1  -3    0.70    6.40
   1 -11  -3   -0.70    8.30
 -11  10  -3    8.60    8.20
 -11  10  -3    3.00    7.30
   1 -11  -3    8.60    6.30
  10   1  -3   34.50    9.90
 -11  10  -3   13.00    9.30
  10   1  -3   11.40   10.80
 -11  10  -3   14.20    8.90
 -11  10  -3   24.80   18.90
  10   1  -3   26.60   23.90
   1 -11  -3  -16.20   15.50
 -11  10  -3   14.50    9.20
  11 -10   3    2.60   11.50
  -1  11   3    7.00   18.60
 -10  -1   3  -28.60   16.50
  -1  11   3   11.70    9.10
  -1  11   3    6.60    9.70
  11 -10   3   -3.00    7.90
  11 -10   3    4.90    8.10
 -10  -1   3    9.70    9.10
  -1  11   3    2.10    7.90
  -1  11   3    1.00    9.80
  -1  11   3    4.00    7.00
  -1  11   3   13.10    6.50
  -1  11   3    2.40    6.10
  11 -10   3   12.10    7.90
  11 -10   3    8.30    9.50
 -10  -1   3    9.30    9.20
  11 -10   3    7.10    8.10
 -11  13  -3   87.39   13.60
  13  -2  -3   91.09   19.00
 -11  13  -3   59.79   15.10
 -11  13  -3   76.29   13.30
  -2 -11  -3   97.79   13.60
  -2 -11  -3   93.49   12.30
  -2 -11  -3   86.89   13.00
  13  -2  -3   57.79   12.10
  -2 -11  -3   85.09   25.70
 -11  13  -3   79.99   15.90
  13  -2  -3   23.00   15.90
  13  -2  -3   89.99   11.80
  -2 -11  -3  100.59   25.20
  13  -2  -3   96.39   33.80
 -13   2   3  103.39   15.90
   2  11   3   76.99   13.70
  11 -13   3   69.39   12.70
   2  11   3   92.89   19.50
   2  11   3   89.29   14.70
   2  11   3   93.49   10.10
  11 -13   3   80.09   15.20
 -13   2   3  108.99   14.80
   2  11   3   96.69   14.80
 -13   2   3   57.99   22.50
   2  11   3   81.09   14.70
  11 -13   3   83.29   15.50
  11 -13   3  122.79   18.30
 -13   2   3  152.48   18.80
  11 -13   3   75.39   15.20
 -13   2   3  108.89   19.30
  -5 -11  -3  -17.90   27.70
  -5 -11  -3   21.40   14.20
 -11  16  -3   -3.30   18.70
  16  -5  -3   20.20   14.10
 -11  16  -3   19.70   12.90
  16  -5  -3   13.30   18.90
 -11  16  -3   33.90   13.70
  -5 -11  -3   54.39   13.10
  16  -5  -3   11.80    8.40
  16  -5  -3   73.19   38.80
  -5 -11  -3   63.49   17.60
  -5 -11  -3   61.99   28.00
   5  11   3   16.80   18.20
  11 -16   3   33.20   17.00
   5  11   3   26.80   12.30
   5  11   3   18.00   14.30
   5  11   3   37.90   13.90
  11 -16   3   34.20   15.80
 -16   5   3   34.80   15.00
 -16   5   3   33.40   16.90
 -16   5   3   13.80   21.30
 -16   5   3  -46.30   22.80
 -16   5   3   24.30   20.20
  11 -16   3    0.90   15.20
 -12  -3  -3   29.70   13.60
  15 -12  -3   26.20   13.60
 -12  -3  -3   33.20   27.00
 -12  -3  -3   22.70   12.00
  15 -12  -3   16.10   12.50
  15 -12  -3   22.00   14.90
  -3  15  -3   15.10   13.10
  -3  15  -3   -4.50    8.50
  -3  15  -3    5.80   16.30
  15 -12  -3   -1.80   27.00
 -12  -3  -3   20.40   14.20
 -15  12   3   17.00   10.60
  12   3   3   29.80   11.90
   3 -15   3   25.10   17.10
 -15  12   3    9.60   14.40
  12   3   3    9.20   15.50
   3 -15   3    2.70   14.40
   3 -15   3   -5.90   11.50
 -15  12   3   -5.90   15.50
   3 -15   3   -7.70   13.80
   3 -15   3   28.40   35.50
  12   3   3   26.90   12.20
 -15  12   3    9.20   17.30
  12   3   3    6.20   15.40
   3 -15   3   24.20   12.80
  12 -12  -3    5.40   10.30
 -12   0  -3    6.10    9.00
  12 -12  -3   11.70    9.00
   0  12  -3  -10.00   12.20
 -12   0  -3   14.00    9.80
  12 -12  -3   38.80   16.60
   0  12  -3  -20.10   12.90
 -12   0  -3   -6.30   20.60
  12 -12  -3   -1.90    7.60
 -12   0  -3  -15.10   20.00
   0  12  -3   -2.20    5.40
   0  12  -3    0.30    8.50
   0  12  -3   -3.70   12.30
  12 -12  -3   -2.80   20.00
  12   0   3    1.90    9.10
   0 -12   3   -5.70   10.10
  12   0   3   12.50   11.90
  12   0   3    8.50    7.30
  12   0   3    1.70    8.80
   0 -12   3   11.90   11.90
 -12  12   3    7.10    9.70
   0 -12   3   30.70   25.30
   0 -12   3    3.60    9.90
 -12  12   3    0.00   12.10
   0 -12   3   17.80   12.90
 -12  12   3    1.10    8.80
   0 -12   3   -0.50    8.50
 -12  12   3   -6.00   10.40
 -12   3  -3   53.99    9.50
   9 -12  -3   57.89   20.20
   3   9  -3   71.49   15.50
   9 -12  -3   99.79   12.50
 -12   3  -3   99.89   12.50
   3   9  -3   53.79   12.90
 -12   3  -3   61.79    8.90
 -12   3  -3   74.79   11.30
   3   9  -3   72.39   14.60
   3   9  -3   74.09    8.70
   3   9  -3   73.29   12.50
   9 -12  -3  111.19   15.00
 -12   3  -3   50.79   22.60
 -12   3  -3   67.19   17.70
  12  -3   3   60.29    9.90
  -3  -9   3   65.79   16.30
  -3  -9   3   61.09   22.10
  -3  -9   3   64.39   14.10
  -9  12   3   90.79   22.30
  12  -3   3   81.49   12.10
  12  -3   3   58.09   13.40
  -3  -9   3   73.69   10.90
  -3  -9   3   61.89   12.40
  -9  12   3  104.99   15.30
  -3  -9   3   75.99   12.60
  -3  -9   3   65.79   12.40
  12  -3   3   57.69   14.40
  -9  12   3   84.59   12.80
  12  -3   3   69.69   13.70
  12  -3   3   60.39   11.20
 -12   6  -3   10.00    6.60
   6   6  -3    9.90    7.60
   6   6  -3   14.80    7.90
   6   6  -3   23.50   11.40
   6   6  -3    1.00   10.30
   6 -12  -3   31.10    8.40
   6   6  -3    3.70    8.60
   6 -12  -3    4.20    7.20
 -12   6  -3   -5.30   12.90
   6   6  -3   16.70    9.10
 -12   6  -3   19.80    8.60
 -12   6  -3   21.40    8.90
   6 -12  -3   30.40   17.50
   6 -12  -3   12.80   10.20
   6 -12  -3   18.20    8.20
 -12   6  -3    2.90    6.40
 -12   6  -3   11.80    8.50
 -12   6  -3   12.70   19.50
   6 -12  -3   26.60    8.10
   6 -12  -3   19.40   15.60
   6   6  -3    7.70   21.50
   6   6  -3   18.60    6.30
  -6  12   3   32.90   19.80
  -6  12   3   17.30   10.10
  -6  12   3   30.40    9.30
  12  -6   3   21.70   10.00
  -6  12   3   30.10   10.70
  -6  -6   3   22.40    8.90
  -6  -6   3    9.40    8.70
  12  -6   3    0.90    7.20
  -6  -6   3   22.20    7.70
  -6  12   3   32.70   11.00
  -6  12   3   19.50    7.30
  -6  12   3   23.40    8.30
  -6  -6   3   -0.70    7.80
  -6  -6   3    9.40    7.20
  12  -6   3    5.40   12.00
  -6  12   3   21.00    7.60
  12  -6   3   11.40    8.90
  12  -6   3   13.70    7.00
 -12   9  -3   57.79   11.50
   3 -12  -3   33.40   19.60
   9   3  -3   39.30   10.90
   3 -12  -3   36.00    9.60
   3 -12  -3   43.80   11.00
   3 -12  -3   34.60    8.50
   9   3  -3   28.80    9.30
   3 -12  -3   50.09    9.00
   9   3  -3   50.59   14.50
 -12   9  -3   59.59   11.40
   9   3  -3   88.09   29.20
   3 -12  -3   52.99   19.50
 -12   9  -3   22.20    8.90
   9   3  -3   71.69   11.90
   9   3  -3   25.90    8.70
 -12   9  -3   63.69   12.00
 -12   9  -3   49.60   22.10
   9   3  -3   25.70   11.60
   3 -12  -3   44.50   10.70
 -12   9  -3   32.90   10.20
  -9  -3   3   32.80    9.90
  12  -9   3   40.40   10.00
  12  -9   3   51.69   14.90
  -9  -3   3   39.30    9.10
  -9  -3   3   41.10    8.20
  -9  -3   3   33.30   10.90
  -3  12   3   45.40   10.10
  -3  12   3   47.60   10.10
  12  -9   3   46.70   11.10
  12  -9   3   49.90   11.00
  -3  12   3   41.20    8.50
  -3  12   3   62.59   21.50
  -3  12   3   51.29   12.40
  -3  12   3   55.19   12.50
  -3  12   3   50.39   12.20
  -9  -3   3   29.00   11.20
  12  -9   3   64.79   11.60
  -3  12   3   47.20   11.50
  12  -9   3   50.99   11.40
   0 -12  -3    3.20   21.00
 -12  12  -3    4.10   11.30
  12   0  -3   -6.80    8.70
   0 -12  -3    4.20    8.60
  12   0  -3   -9.50   13.60
 -12  12  -3   10.00   24.10
   0 -12  -3   43.40   21.90
 -12  12  -3   -4.60    7.90
  12   0  -3   19.20   29.40
 -12  12  -3    2.80   10.00
  12   0  -3  -17.70   10.70
 -12  12  -3    0.60   13.40
  12   0  -3   -0.50    6.90
 -12  12  -3    2.20    7.10
   0 -12  -3   -0.50    8.00
 -12  12  -3   -4.00    8.30
   0 -12  -3  -27.40   10.10
   0  12   3  -31.90   11.60
 -12   0   3   18.10   21.60
   0  12   3   13.60    9.00
   0  12   3   12.10   11.00
   0  12   3    6.90    7.50
  12 -12   3   -8.70   10.10
  12 -12   3   -0.10   12.10
 -12   0   3   -0.80   12.00
  12 -12   3   -8.00    8.40
  12 -12   3    2.00   10.30
   0  12   3    4.00    6.80
  12 -12   3   -1.30   10.30
 -12   0   3  -15.10   10.90
   0  12   3    2.40   10.40
  -3 -12  -3   -8.40   12.40
 -12  15  -3   17.70   11.70
 -12  15  -3   14.10   16.70
  -3 -12  -3    7.20   11.10
  -3 -12  -3  -26.10   29.40
 -12  15  -3   -0.80   12.60
  15  -3  -3    4.80    8.20
  15  -3  -3   24.90   14.20
  15  -3  -3   16.00   17.00
  -3 -12  -3   14.00   14.70
  15  -3  -3   23.50   35.10
  -3 -12  -3    8.10   25.00
   3  12   3    8.30   17.30
  12 -15   3   -4.40   14.70
   3  12   3   26.80   14.60
 -15   3   3  -11.30   14.60
   3  12   3   -3.50   11.40
  12 -15   3    2.50   12.80
 -15   3   3   10.00   23.50
 -15   3   3    0.70   14.70
   3  12   3  -12.10    9.70
  12 -15   3    2.80   17.40
 -15   3   3  -13.10   10.90
  12 -15   3   19.40   14.60
 -15   3   3   23.50   15.90
 -13  -4  -3   85.29   39.30
 -13  -4  -3   86.69   17.60
  -4  17  -3   55.79   18.40
  17 -13  -3    2.20   15.90
  -4  17  -3   49.30   12.40
  -4  17  -3   62.39   23.00
  17 -13  -3   35.30   21.20
  13   4   3   69.89   17.70
 -17  13   3   38.30   19.50
   4 -17   3   48.90   21.40
   4 -17   3   65.79   20.30
  13   4   3   43.20   14.40
   4 -17   3   39.60   17.10
 -17  13   3   40.20   22.80
 -17  13   3   52.29   18.80
  13   4   3    9.80   21.90
 -13  -1  -3   16.70   11.60
 -13  -1  -3   41.40   26.70
  -1  14  -3   46.40   18.90
 -13  -1  -3   23.80   13.70
  -1  14  -3   12.70   17.50
  14 -13  -3   19.00   12.10
 -13  -1  -3    6.20   11.30
  14 -13  -3   27.90   11.60
  14 -13  -3   24.60   14.50
  -1  14  -3   15.20   10.30
  -1  14  -3   18.60    8.10
  14 -13  -3   38.10   29.10
   1 -14   3   26.50   16.20
   1 -14   3   12.50   11.10
 -14  13   3   25.50   11.30
   1 -14   3   23.90   14.90
  13   1   3    1.00   15.60
   1 -14   3    2.60   14.90
  13   1   3   24.30   12.60
   1 -14   3   -1.00   14.50
 -14  13   3   25.20   17.20
 -14  13   3   27.80   15.60
   1 -14   3    7.30   30.70
  13   1   3   23.60    9.90
 -14  13   3    1.70   12.70
   2  11  -3   73.49   21.70
 -13   2  -3   73.19   12.80
   2  11  -3   91.99   16.20
  11 -13  -3   47.40   16.70
 -13   2  -3   98.39   10.10
 -13   2  -3   65.29   12.60
  11 -13  -3   72.09   12.90
   2  11  -3   87.09   17.30
  11 -13  -3  100.29   15.80
   2  11  -3   70.69   16.70
  11 -13  -3   94.39   15.20
 -13   2  -3  116.29   26.20
 -13   2  -3  110.09   28.50
  11 -13  -3   73.49   24.50
   2  11  -3   66.79    9.20
 -13   2  -3   85.89   13.10
  13  -2   3   78.49   14.70
  -2 -11   3  103.69   25.70
 -11  13   3   10.40   26.60
 -11  13   3   73.69   16.90
  -2 -11   3  103.69   19.10
  13  -2   3   74.39   13.10
  -2 -11   3   69.99   12.30
  13  -2   3   76.79   12.90
 -11  13   3  107.89   15.50
  13  -2   3   67.49   11.80
 -11  13   3   58.09   22.30
  -2 -11   3  101.99   17.00
 -11  13   3  103.79   19.80
  -2 -11   3   84.69   15.20
  -2 -11   3   84.09   23.20
 -13   5  -3   60.89   18.80
   5   8  -3   35.10   12.70
   5   8  -3   60.59   24.40
   8 -13  -3   53.49   11.00
 -13   5  -3   12.00   22.00
 -13   5  -3   55.69   12.10
 -13   5  -3   37.30   10.60
 -13   5  -3   19.10    8.50
   8 -13  -3   56.89   11.70
   5   8  -3   31.40   10.10
   5   8  -3   64.29   13.40
   8 -13  -3   25.70   21.50
   8 -13  -3   69.79   23.40
   8 -13  -3   28.60   13.70
 -13   5  -3   47.10    8.60
   5   8  -3   54.79   14.60
   5   8  -3   44.30   11.90
   8 -13  -3   44.80   10.40
  13  -5   3   44.90   12.40
  -5  -8   3   38.50   11.70
  13  -5   3   51.79   20.50
  -8  13   3   44.50   10.30
  13  -5   3   32.20    9.30
  -8  13   3   34.30   12.10
  13  -5   3   34.40    9.20
  -8  13   3   25.80   23.30
  -5  -8   3   59.99   13.90
  -5  -8   3   43.30   11.80
  -5  -8   3   47.50   10.50
  -5  -8   3   58.49    9.70
  -8  13   3   43.40   11.60
  -8  13   3   42.90   11.50
   5 -13  -3   55.39   12.60
   8   5  -3   36.90   10.10
 -13   8  -3   50.49   14.60
   5 -13  -3   30.50   11.30
 -13   8  -3   15.10    9.20
   8   5  -3   47.40   12.10
   5 -13  -3   33.30   15.60
   8   5  -3   36.60   10.90
   8   5  -3   15.50   15.30
 -13   8  -3   36.20   10.90
   8   5  -3   24.60   25.80
   5 -13  -3   47.60   22.00
   8   5  -3   36.20   13.50
   8   5  -3   39.40   10.80
   5 -13  -3   56.59   11.10
 -13   8  -3   39.60   23.00
 -13   8  -3   29.70   10.80
   5 -13  -3   34.00    9.40
  -8  -5   3   60.29   13.30
  13  -8   3    0.90   11.40
  -5  13   3   37.90   12.50
  -5  13   3   32.70   13.60
  13  -8   3   57.19   12.10
  -8  -5   3   44.60    9.50
  -5  13   3   65.59   23.60
  -8  -5   3   56.69   11.90
  -5  13   3   36.20    9.00
  13  -8   3   56.89   13.70
  -5  13   3   38.30   11.30
  13  -8   3   53.19    8.40
  -5  13   3   46.20   10.80
  -8  -5   3   44.40   10.10
  -8  -5   3   46.00   12.50
  -5  13   3   52.79   13.20
  13  -8   3   32.40    9.60
  -5  13   3   48.10   10.40
  11   2  -3   80.89   14.20
 -13  11  -3  177.48   38.00
   2 -13  -3  104.59   12.80
  11   2  -3  151.88   30.10
   2 -13  -3   91.29   25.40
  11   2  -3   88.89   18.30
 -13  11  -3  113.09   15.10
  11   2  -3  122.59   32.40
   2 -13  -3  119.09   15.80
 -13  11  -3  105.19   14.40
  11   2  -3   93.49   12.50
 -13  11  -3   99.69   15.10
  11   2  -3  103.69   15.10
   2 -13  -3   77.19   25.60
 -13  11  -3   83.79   15.50
   2 -13  -3   98.69   14.80
  -2  13   3   69.59   13.20
  -2  13   3   68.69   12.00
  13 -11   3   71.79   13.30
  13 -11   3   71.89   12.70
 -11  -2   3   56.09   25.00
  -2  13   3  120.19   18.40
 -11  -2   3  125.69   17.20
  -2  13   3   84.79   18.40
 -11  -2   3  100.89   24.50
  13 -11   3   94.89   16.10
  13 -11   3   76.89   14.90
  13 -11   3   70.09   15.00
 -11  -2   3  120.89   14.40
  -2  13   3   87.59   15.30
  -2  13   3   95.19   11.80
 -11  -2   3  107.49   15.70
  -1 -13  -3    2.10   12.00
  14  -1  -3    8.90    8.90
  -1 -13  -3   12.60   14.90
  14  -1  -3   10.00   12.70
 -13  14  -3   44.20   12.60
  14  -1  -3   11.60   37.60
  -1 -13  -3   30.90   10.90
 -13  14  -3   -2.70   29.60
 -13  14  -3   13.50   13.50
  -1 -13  -3   50.29   28.40
  14  -1  -3   26.00   17.50
  -1 -13  -3   54.79   28.40
   1  13   3   15.60   14.40
   1  13   3   21.90   18.10
   1  13   3   28.60   12.20
  13 -14   3    5.00   12.50
   1  13   3   33.80   15.20
 -14   1   3   -5.30   25.90
   1  13   3   25.00   11.10
  13 -14   3  -41.10   15.20
 -14   1   3   14.50   13.90
  13 -14   3    9.70   14.80
  13 -14   3   40.20   15.40
 -14   1   3   26.70   14.70
 -13  17  -3   63.89   22.90
  -4 -13  -3  116.79   36.60
  17  -4  -3   46.30   22.60
  -4 -13  -3   39.50   38.30
 -13  17  -3   58.39   18.00
 -13  17  -3   77.49   19.00
  17  -4  -3   27.30   11.30
  17  -4  -3    9.50   45.60
  -4 -13  -3   54.19   16.30
  17  -4  -3   57.99   18.90
 -17   4   3   21.40   17.00
  13 -17   3   55.89   20.00
   4  13   3   30.70   23.70
   4  13   3   66.69   17.50
  13 -17   3   40.80   18.30
  13 -17   3   19.70   19.20
   4  13   3   33.50   19.40
   4  13   3   43.60   14.60
 -17   4   3   72.79   22.40
  16 -14  -3   81.69   20.10
  -2  16  -3  115.09   22.20
  -2  16  -3  121.59   25.40
  16 -14  -3  136.39   38.70
 -14  -2  -3  106.19   38.30
  -2  16  -3   89.39   14.20
 -14  -2  -3  129.29   19.90
   2 -16   3  114.99   22.30
   2 -16   3  101.19   19.40
  14   2   3   82.99   19.70
 -16  14   3  125.29   22.10
 -16  14   3  104.19   18.30
 -16  14   3  132.29   24.90
   2 -16   3  122.69   22.50
  14   2   3  100.69   18.30
  14   2   3   91.49   21.50
   1  13  -3   22.10   18.00
   1  13  -3   25.40    8.30
   1  13  -3  -14.00   15.50
 -14   1  -3   25.80   13.70
 -14   1  -3   20.80   12.50
 -14   1  -3   10.60    4.40
  13 -14  -3  -16.80   12.30
 -14   1  -3   -1.00   26.60
  13 -14  -3   -5.80   13.00
   1  13  -3   -6.30    9.70
 -14   1  -3  -17.60   30.90
  13 -14  -3   17.80   11.80
  14  -1   3   27.00   18.70
  14  -1   3   23.90   15.80
 -13  14   3   15.60   11.30
 -13  14   3   24.50   13.70
  -1 -13   3    3.90   15.70
 -13  14   3   11.90   13.80
  -1 -13   3    4.70   14.40
  14  -1   3   27.40   12.00
 -13  14   3   21.60   16.50
  -1 -13   3   30.40   26.20
  14  -1   3   16.90   10.40
  -1 -13   3   20.30   14.70
  -1 -13   3  -28.50   17.70
   4  10  -3  198.18   22.80
 -14   4  -3  248.78   17.50
   4  10  -3  211.08   16.30
 -14   4  -3  194.98   33.90
   4  10  -3  219.28   25.00
 -14   4  -3  284.97   22.80
   4  10  -3  238.18   37.80
  10 -14  -3  239.48   22.50
 -14   4  -3  198.38   20.40
  10 -14  -3  163.98   23.00
   4  10  -3  192.28   22.70
  10 -14  -3  232.48   25.20
 -14   4  -3  181.28   22.90
  10 -14  -3  314.87   42.00
  10 -14  -3  261.97   22.40
 -14   4  -3  223.38   32.00
  10 -14  -3  216.38   39.50
  -4 -10   3  210.88   20.70
  -4 -10   3  228.98   24.00
 -10  14   3  180.28   24.60
  -4 -10   3  179.08   24.40
  14  -4   3  199.38   26.10
 -10  14   3  219.28   25.80
  -4 -10   3  208.38   24.60
  -4 -10   3  252.87   30.40
  14  -4   3  200.88   23.00
 -10  14   3  190.38   21.30
 -10  14   3  182.68   22.40
 -14   7  -3   31.40   18.40
   7   7  -3    3.80   12.80
   7 -14  -3    1.90   20.00
 -14   7  -3    9.30    9.90
   7   7  -3   21.40   11.70
 -14   7  -3   16.00   10.80
   7 -14  -3   25.70   10.50
   7 -14  -3    2.90   10.70
 -14   7  -3   16.20   23.80
   7 -14  -3   24.50   10.20
 -14   7  -3   15.40   11.70
   7 -14  -3   -1.50   24.70
   7   7  -3  -19.20   10.10
   7   7  -3    4.20   25.60
   7 -14  -3   14.80   13.10
   7   7  -3    4.40   14.00
   7   7  -3   11.90   10.30
   7   7  -3    4.50    8.50
  -7  -7   3   -0.50    9.70
  -7  14   3    5.60   12.40
  -7  -7   3   -1.30   16.10
  -7  -7   3   20.00   13.00
  -7  14   3    0.80    7.60
  -7  14   3    7.10   12.20
  -7  14   3    8.70   10.50
  -7  -7   3    6.70    8.60
  -7  14   3    2.80   24.60
  -7  -7   3   -2.40   10.20
  14  -7   3   -3.10    9.50
  14  -7   3   -2.40   11.10
  -7  14   3    1.20    9.80
  14  -7   3    2.70    8.10
  10   4  -3  189.28   39.30
   4 -14  -3  219.28   22.70
   4 -14  -3  232.48   20.80
   4 -14  -3  238.38   35.90
   4 -14  -3  228.88   20.70
  10   4  -3  257.37   23.20
  10   4  -3  201.48   20.50
 -14  10  -3  248.38   24.30
 -14  10  -3  221.48   20.80
 -14  10  -3  195.48   24.90
  10   4  -3  263.97   33.30
   4 -14  -3  191.08   25.20
 -14  10  -3  198.18   36.70
  10   4  -3  216.08   23.00
  14 -10   3  195.18   25.00
  14 -10   3  205.88   21.00
  14 -10   3  243.08   26.30
  -4  14   3  212.68   25.10
  -4  14   3  215.98   20.20
  -4  14   3  238.38   28.40
  -4  14   3  205.98   20.30
 -10  -4   3  182.08   19.30
  -4  14   3  227.48   23.40
 -10  -4   3  230.48   25.90
  14 -10   3  223.88   22.20
 -10  -4   3  226.18   24.40
  -4  14   3  222.68   26.10
 -10  -4   3  214.88   20.30
 -10  -4   3  235.18   25.90
 -14  13  -3   51.69   16.40
 -14  13  -3   -0.30   11.20
   1 -14  -3   31.70   26.30
  13   1  -3   19.60   10.50
 -14  13  -3   31.70   11.70
 -14  13  -3   10.60   30.20
  13   1  -3   21.90   13.20
   1 -14  -3   13.90   12.20
  13   1  -3   18.70   17.00
   1 -14  -3   18.50   10.30
   1 -14  -3    1.10   15.00
   1 -14  -3   32.80   27.20
  13   1  -3    7.10   36.80
 -13  -1   3   24.20   15.60
  14 -13   3   22.80   18.20
  -1  14   3   10.60   10.60
 -13  -1   3   22.00   10.60
 -13  -1   3    8.10   15.90
  14 -13   3    2.40   14.70
  -1  14   3   25.30   15.80
 -13  -1   3    4.10   12.60
  14 -13   3   25.50   14.70
  -1  14   3   18.40   10.00
  -1  14   3   40.20   12.70
  -1  14   3   42.00   20.10
  14 -13   3   -4.10   12.90
  14 -13   3   34.70   13.90
  -1  14   3  -11.00   26.30
 -13  -1   3    4.10   28.00
  16  -2  -3   89.69   19.20
  -2 -14  -3   83.89   16.30
  16  -2  -3   64.19   22.50
 -14  16  -3  104.19   21.20
 -14  16  -3  107.39   19.80
  16  -2  -3   70.99   48.20
 -14  16  -3  142.19   26.00
  -2 -14  -3  113.99   36.90
  -2 -14  -3   90.39   37.40
 -14  16  -3   58.89   36.60
  16  -2  -3  108.49   15.10
  14 -16   3  115.09   23.00
   2  14   3   97.39   17.70
 -16   2   3   82.19   21.80
  14 -16   3   58.29   20.10
   2  14   3  138.59   19.40
   2  14   3  114.69   23.90
   2  14   3   68.49   22.40
  14 -16   3   75.99   18.60
  15 -15  -3   26.30   33.20
  15 -15  -3   -0.60   14.60
 -15   0  -3  -43.70   32.40
   0  15  -3  -47.30   17.70
   0  15  -3   11.00   19.90
  15 -15  -3  -14.50   16.10
   0  15  -3   18.90   13.20
   0  15  -3   -0.60    9.60
 -15   0  -3   37.40   32.10
 -15   0  -3   17.10   15.40
   0 -15   3  -32.60   17.60
   0 -15   3  -11.10   16.60
   0 -15   3   46.20   23.30
 -15  15   3   14.50   15.60
  15   0   3   -7.80   14.10
   0 -15   3   -7.50   12.50
  15   0   3   -4.60   11.70
 -15  15   3   -2.20   13.60
 -15  15   3  -42.60   19.60
  15   0   3   -2.60   17.40
  12 -15  -3   13.80   12.90
   3  12  -3   17.70    8.50
 -15   3  -3    3.40   29.00
   3  12  -3   32.50   17.70
 -15   3  -3   15.90    8.70
  12 -15  -3   42.30   14.30
 -15   3  -3   19.00   13.00
  12 -15  -3   33.20   28.00
   3  12  -3   24.80   14.80
 -15   3  -3   10.60   12.70
 -15   3  -3   34.50   26.00
   3  12  -3   14.10   16.50
 -15   3  -3  -16.70   15.00
  12 -15  -3   27.70   14.60
  -3 -12   3   11.60   12.30
 -12  15   3    7.20   21.10
  15  -3   3   27.80   15.90
 -12  15   3  -27.50   16.00
  -3 -12   3   17.50   17.30
 -12  15   3   -1.50    9.30
  -3 -12   3   25.20   15.70
  15  -3   3   27.30   12.50
  -3 -12   3   25.30   21.30
  -3 -12   3   -8.00   10.50
  15  -3   3   23.70   14.80
  15  -3   3   35.10   12.60
 -12  15   3    3.30   12.70
 -15   6  -3    6.50   11.80
   9 -15  -3  -39.10   17.10
   9 -15  -3   30.60   27.10
 -15   6  -3  -11.20   19.60
   9 -15  -3   -1.70   12.80
 -15   6  -3    6.20   10.60
   6   9  -3    9.70   12.50
   6   9  -3  -13.10   14.20
   6   9  -3    0.30   26.50
   9 -15  -3    7.50   12.70
   6   9  -3   28.60   14.30
   6   9  -3  -11.90   16.10
 -15   6  -3   21.70   10.80
   9 -15  -3    6.40   11.00
 -15   6  -3   -3.00   26.60
 -15   6  -3   -8.00   13.20
   9 -15  -3   15.60   26.70
  -9  15   3    3.60   13.40
  -6  -9   3   24.60   13.00
  15  -6   3    3.40   10.20
  -9  15   3  -10.60   17.50
  15  -6   3    1.50   10.80
  -9  15   3    3.20   10.80
  -6  -9   3   -4.00   17.30
  15  -6   3   -2.40   10.50
  -6  -9   3    9.90    9.80
  -6  -9   3   19.20   14.80
  -9  15   3    1.50    9.00
  -6  -9   3    7.00   10.70
   6 -15  -3    8.90   24.00
 -15   9  -3    6.50   12.30
 -15   9  -3   18.70   17.50
   9   6  -3   10.70   11.50
 -15   9  -3    3.60   12.30
 -15   9  -3  -31.80   13.70
   9   6  -3   28.10   31.10
 -15   9  -3  -25.90    9.90
   6 -15  -3   -0.90   15.40
   6 -15  -3    2.50   10.60
   9   6  -3   -6.70   12.90
   9   6  -3   20.50   12.00
   6 -15  -3   -1.00   17.90
   6 -15  -3  -13.20   12.30
   9   6  -3  -14.90   15.00
 -15   9  -3   33.20   30.30
  15  -9   3   13.60   11.40
  -9  -6   3    5.40   13.00
  -6  15   3    2.90   10.50
  -9  -6   3  -15.50   12.10
  15  -9   3   -8.80   10.00
  15  -9   3   15.40   13.90
  -6  15   3  -14.40   19.80
  -6  15   3   -4.00   15.10
  -9  -6   3   -2.50   11.30
  -9  -6   3   12.60    9.30
  -6  15   3   -6.90   10.60
  -9  -6   3   -8.90   14.20
  -6  15   3    0.10   11.50
  12   3  -3   13.10   13.70
   3 -15  -3   -7.10   10.60
   3 -15  -3   -3.60   11.10
   3 -15  -3   11.60   26.80
 -15  12  -3    9.00   15.30
 -15  12  -3   10.20   11.30
 -15  12  -3   11.80   15.10
   3 -15  -3    1.90   16.40
  12   3  -3    8.80   11.30
 -15  12  -3   27.40   29.70
  12   3  -3   16.40   18.40
  12   3  -3   16.10   35.50
  -3  15   3   -4.10   16.10
 -12  -3   3   -8.90   10.00
  -3  15   3   -8.50   11.80
  -3  15   3   -0.90   24.50
 -12  -3   3    7.40   16.60
 -12  -3   3  -12.00   31.30
  15 -12   3   10.00   15.30
  15 -12   3   13.10   14.80
  -3  15   3   -3.10   10.20
 -12  -3   3   11.00   13.50
 -12  -3   3  -10.60   12.30
  -3  15   3   20.50   12.20
  15 -12   3   -2.00   10.90
  -3  15   3  -28.20   16.20
  15   0  -3    5.80   11.70
 -15  15  -3   -8.10   15.80
  15   0  -3   51.89   51.79
 -15  15  -3    1.80   34.80
  15   0  -3   33.60   16.40
   0 -15  -3    2.90   33.00
 -15  15  -3   -9.90   18.60
   0 -15  -3  -12.50   33.40
  15   0  -3  -21.10   20.30
   0 -15  -3    0.20   13.10
 -15  15  -3  -22.30   16.80
   0  15   3   -2.00   12.80
  15 -15   3  -14.10   22.10
 -15   0   3    9.60   17.60
   0  15   3  -14.10   18.30
   0  15   3  -26.60   13.70
   0  15   3   33.10   22.00
  15 -15   3   18.90   17.10
  15 -15   3   -9.30   16.60
  15 -15   3   25.50   14.30
 -15   0   3  -13.60   12.50
 -15   0   3  -11.80   15.90
   2  14  -3   94.89   19.90
   2  14  -3  100.39   25.60
   2  14  -3  123.09   25.40
 -16   2  -3  139.79   21.90
   2  14  -3  111.79   14.70
 -16   2  -3   55.59   37.20
  14 -16  -3   66.69   19.70
 -16   2  -3  123.29   38.10
  14 -16  -3  120.89   43.80
  -2 -14   3  111.79   23.00
  -2 -14   3  152.98   19.60
  -2 -14   3  128.79   24.70
  16  -2   3   95.79   18.30
 -14  16   3   83.29   18.80
  16  -2   3  132.39   18.80
 -14  16   3  101.59   16.90
 -14  16   3  112.59   24.70
  16  -2   3  114.29   24.70
  -2 -14   3  110.49   27.70
 -16   5  -3   45.60   17.20
  11 -16  -3  -18.50   32.90
   5  11  -3   32.90   15.80
   5  11  -3   29.60   17.80
   5  11  -3   16.60   17.80
  11 -16  -3   37.30   15.40
 -16   5  -3   35.70   15.20
   5  11  -3   37.70    9.70
 -16   5  -3   31.70   14.80
 -16   5  -3    6.40   30.70
  11 -16  -3   41.10   16.10
 -16   5  -3   76.39   30.40
  11 -16  -3    8.90   30.40
 -16   5  -3   42.90   15.90
  16  -5   3   46.60   14.70
  -5 -11   3   27.00   12.20
 -11  16   3   27.30   18.60
 -11  16   3   37.30   14.50
  -5 -11   3  -14.60   22.40
  -5 -11   3   23.50   15.10
 -11  16   3   22.90   11.90
  16  -5   3   22.10   11.60
  16  -5   3    5.00   15.70
  -5 -11   3   33.80   16.60
   8   8  -3  183.78   18.70
   8 -16  -3  207.48   24.70
 -16   8  -3  248.58   32.80
   8 -16  -3  177.08   25.60
 -16   8  -3  205.58   23.00
   8   8  -3  243.68   41.00
 -16   8  -3  152.98   19.20
   8 -16  -3  179.58   20.60
   8   8  -3  171.08   25.30
 -16   8  -3  199.38   24.90
   8   8  -3  132.49   20.60
   8   8  -3  167.58   25.70
   8 -16  -3  208.98   34.10
   8   8  -3  221.48   25.70
   8 -16  -3  197.08   37.90
 -16   8  -3  184.98   40.60
  16  -8   3  165.48   23.50
  -8  16   3  265.07   25.10
  -8  -8   3  165.58   23.90
  -8  16   3  189.68   23.60
  -8  -8   3  157.58   22.10
  16  -8   3  192.68   25.70
  -8  -8   3  186.38   21.50
  -8  -8   3  191.48   24.70
  16  -8   3  251.27   34.20
  11   5  -3   33.30   13.90
   5 -16  -3   -9.10   27.60
   5 -16  -3   12.70   12.60
   5 -16  -3   47.00   19.10
   5 -16  -3   22.40   15.60
  11   5  -3   38.00   40.10
  11   5  -3   10.00   19.20
  11   5  -3   27.80   16.10
 -16  11  -3   26.70   14.20
 -16  11  -3   -4.70   33.20
 -16  11  -3   17.80   19.80
  -5  16   3   14.80   18.00
  16 -11   3   11.20   12.60
 -11  -5   3   33.70   11.90
 -11  -5   3   17.60   14.20
 -11  -5   3   27.80   16.50
  16 -11   3    7.60   15.70
  -5  16   3    9.40   11.00
  -5  16   3   19.20   20.10
  -5  16   3   -1.80   12.20
   2 -16  -3  113.69   36.00
  14   2  -3   78.79   19.90
 -16  14  -3   77.49   42.20
   2 -16  -3   94.19   17.20
   2 -16  -3  109.09   38.20
 -16  14  -3   42.00   18.60
  14   2  -3   77.69   16.80
  14   2  -3  153.28   51.49
 -16  14  -3  119.99   23.60
  14   2  -3   74.19   25.10
 -14  -2   3   93.19   19.40
  16 -14   3   88.19   21.20
  -2  16   3  112.89   25.30
  -2  16   3   85.89   24.20
  16 -14   3  124.99   21.10
  16 -14   3   98.49   25.30
  -2  16   3   83.29   16.30
  -2  16   3   86.79   17.80
 -14  -2   3   75.59   20.50
 -14  -2   3  117.29   22.40
  13 -17  -3   27.80   44.90
   4  13  -3   40.20   15.90
  13 -17  -3   61.19   37.80
  13 -17  -3   56.79   19.90
 -17   4  -3  117.49   38.60
   4  13  -3   51.09   12.40
   4  13  -3   53.19   23.60
   4  13  -3   77.09   23.00
 -17   4  -3  145.19   40.80
  17  -4   3   41.70   16.70
  -4 -13   3   70.09   19.50
  17  -4   3   65.89   18.20
 -13  17   3   47.10   17.90
 -13  17   3  106.99   25.20
 -13  17   3   65.09   17.00
  -4 -13   3   78.29   17.10
  -4 -13   3   65.19   21.70
  17  -4   3   57.19   22.10
  -4 -13   3   45.90   30.80
 -17   7  -3    7.80   14.50
  10 -17  -3   67.39   37.00
  10 -17  -3   25.90   25.60
 -17   7  -3   68.29   30.00
   7  10  -3   25.60   18.30
 -17   7  -3   62.39   20.50
  10 -17  -3    6.40   17.00
 -17   7  -3   24.10   39.10
  10 -17  -3   88.49   34.80
   7  10  -3   33.90   20.10
   7  10  -3   66.49   18.20
  -7 -10   3   50.69   19.00
  -7 -10   3   32.80   26.90
 -10  17   3   50.49   16.10
  -7 -10   3  118.59   31.80
 -10  17   3   52.99   21.80
 -10  17   3   37.40   16.10
  17  -7   3   47.30   16.10
  17  -7   3   60.99   20.50
  17  -7   3   64.59   16.80
  10   7  -3   20.10   39.00
  10   7  -3   28.40   18.20
 -17  10  -3   45.00   25.80
   7 -17  -3   37.20   23.60
  10   7  -3   78.99   18.70
 -17  10  -3   44.40   37.70
 -17  10  -3   42.90   18.20
 -17  10  -3    4.10   15.40
   7 -17  -3   35.00   15.70
  10   7  -3   57.89   21.20
   7 -17  -3   97.79   34.80
  -7  17   3   45.80   20.70
  -7  17   3   28.90   14.10
  17 -10   3   74.79   17.40
  17 -10   3   62.09   20.50
  -7  17   3   77.19   17.00
 -10  -7   3   47.90   13.20
  -7  17   3   59.79   22.80
 -10  -7   3   84.99   20.40
 -10  -7   3   58.49   22.60
   4 -17  -3   66.39   39.70
  13   4  -3   64.19   54.89
  13   4  -3   83.29   25.40
 -17  13  -3   70.49   21.60
 -17  13  -3   67.99   44.00
 -17  13  -3   -7.90   16.80
   4 -17  -3   40.90   16.30
  13   4  -3   95.39   20.90
  -4  17   3   59.99   24.00
  17 -13   3   77.29   21.40
  -4  17   3   49.90   14.60
  -4  17   3   54.49   15.60
 -13  -4   3   42.20   20.20
  -4  17   3   38.00   23.30
 -13  -4   3   41.80   19.40
  17 -13   3   82.29   19.10
 -13  -4   3  106.79   23.10
   9   9  -3  108.09   21.40
 -18   9  -3  180.48   24.70
   9   9  -3  111.99   23.30
 -18   9  -3  169.68   45.60
   9   9  -3  160.18   44.30
 -18   9  -3  134.59   37.20
   9 -18  -3  139.49   22.30
   9 -18  -3  160.18   41.60
   9   9  -3   98.09   28.40
  -9  18   3  103.39   20.30
  -9  -9   3   90.99   33.60
  18  -9   3  151.28   22.90
  -9  -9   3  166.68   20.20
  -9  -9   3  119.49   24.20
  18  -9   3  129.19   19.90
  -9  -9   3  103.79   23.30
  -9  18   3  125.79   19.80
  18  -9   3  154.18   26.80
   0   1  -4  130.09   21.10
  -1   0  -4  129.19   14.50
   1  -1  -4  135.09   21.00
  -1   0  -4  180.08   21.40
   0   1  -4  144.79    7.50
   0   1  -4  129.89   13.50
   0  -1   4  130.39   21.80
   0  -1   4  152.68   10.30
   0  -1   4  149.49    8.30
   0  -1   4  141.59    8.00
   1   0   4  141.29    9.90
   1   0   4  131.79   16.80
   0  -1   4  149.59   14.00
   1   0   4  141.69    9.40
   0  -1   4  141.89   16.80
   0  -1   4  154.98   14.30
   1   0   4  125.89   18.10
   1   0   4  116.79   20.70
   0  -1   4  136.69    7.90
  -1   1   4  147.19    7.50
  -1   1   4  153.98   21.50
   1   0   4  152.88   15.60
  -1   1   4  159.68   18.20
  -1   1   4  136.59    7.50
   0  -1   4  141.89    8.50
  -1   1   4  129.99    9.30
  -1   1   4  138.99   14.60
  -1   1   4  155.48   16.90
  -1   1   4  151.98    7.40
   0  -1   4  145.99    7.70
  -1   3  -4  166.48   10.10
  -2  -1  -4  180.28   17.20
  -1   3  -4  195.28   16.30
  -1   3  -4  166.58   11.90
   3  -2  -4  173.88   10.60
  -2  -1  -4  174.08   16.70
  -2  -1  -4  216.98   18.30
   3  -2  -4  209.78   24.20
   3  -2  -4  158.88   18.40
   3  -2  -4  180.58    9.70
   3  -2  -4  169.48    9.60
  -1   3  -4  167.48   10.30
  -3   2   4  179.68   10.60
   1  -3   4  170.58   11.50
   1  -3   4  166.88   10.40
  -3   2   4  183.58   10.00
  -3   2   4  169.38    9.90
   2   1   4  171.78   20.60
   1  -3   4  184.28    8.00
   1  -3   4  167.78    7.90
   1  -3   4  143.89   13.00
  -3   2   4  181.68   10.80
   2   1   4  199.48   18.10
  -3   2   4  159.98   21.60
   2   1   4  185.58   11.50
  -3   2   4  181.38   15.10
   1  -3   4  169.28   14.00
   2   1   4  202.38   10.60
  -3   2   4  148.49   18.90
   2   1   4  183.38   17.20
  -3   2   4  157.98   10.50
   1  -3   4  213.88   26.00
   1  -3   4  182.18   11.90
  -3   2   4  176.08    8.50
   1  -3   4  178.78   10.40
  -2   2  -4  735.13   39.60
  -2   2  -4  779.52   32.20
   2   0  -4  712.63   31.70
  -2   2  -4  731.33   31.10
   2   0  -4  709.73   31.90
   0  -2  -4  691.73   40.20
   2   0  -4  694.83   31.70
   0  -2  -4  742.43   45.40
   2   0  -4  660.83   45.80
   2  -2   4  701.23   31.80
   0   2   4  726.43   33.20
  -2   0   4  708.53   32.40
   0   2   4  661.13   39.80
   2  -2   4  664.83   42.60
  -2   0   4  738.83   33.10
   2  -2   4  735.73   33.70
  -2   0   4  721.63   31.80
  -2   0   4  671.13   41.20
   2  -2   4  679.03   38.70
   2  -2   4  726.83   36.70
   2  -2   4  722.43   31.70
  -2   0   4  689.23   32.20
  -2   0   4  705.33   46.10
   0   2   4  743.73   32.90
   0   2   4  666.93   39.70
   2  -2   4  697.93   31.90
   2  -2   4  712.83   47.00
   0   2   4  712.63   44.90
  -2   0   4  642.34   35.50
  -2   5  -4   14.00    3.70
  -2   5  -4   26.80    5.20
  -3  -2  -4   14.80   10.80
   5  -3  -4   27.40    4.30
   5  -3  -4   23.50    4.50
   5  -3  -4   28.40   14.60
  -3  -2  -4   24.50    9.60
   5  -3  -4   25.80    4.50
   5  -3  -4   18.10    4.90
  -2   5  -4   14.90    9.10
   5  -3  -4   24.40    3.90
  -3  -2  -4   16.40    8.20
  -2   5  -4   23.20    4.40
  -2   5  -4   24.60    6.30
   5  -3  -4    5.10   11.20
   3   2   4   17.40   12.90
   2  -5   4   24.80    5.50
   3   2   4   21.80    3.10
   2  -5   4   17.70    4.70
   3   2   4   28.50    8.80
  -5   3   4   21.70    5.30
   2  -5   4   36.50   17.30
   2  -5   4   13.70    7.40
  -5   3   4   21.30    4.40
  -5   3   4   11.80   11.20
   3   2   4   18.60    9.70
   3   2   4   25.40    3.70
   3   2   4   15.80    3.00
  -5   3   4   19.70    4.80
   3   2   4   21.80   13.30
   2  -5   4   21.00    4.70
  -5   3   4   17.50    4.40
   3   2   4   19.70    3.20
  -5   3   4    8.70    3.80
   3   2   4   25.50    3.40
   2  -5   4   24.40    5.40
   2  -5   4   21.40    5.40
   3   2   4   22.60    4.80
   1   2  -4  169.78   10.50
  -3   1  -4  180.18   15.60
   1   2  -4  179.68    9.00
   1   2  -4  178.28   10.50
   1   2  -4  174.28   13.60
   1   2  -4  201.18   24.70
   2  -3  -4  174.38   18.80
   2  -3  -4  185.08   24.50
  -3   1  -4  184.58   18.50
  -2   3   4  199.38    9.60
   3  -1   4  182.88    9.30
   3  -1   4  187.48   19.60
  -2   3   4  192.38    9.90
  -1  -2   4  169.98   10.90
  -2   3   4  181.28    9.90
  -2   3   4  154.68   16.80
  -1  -2   4  170.68   11.90
   3  -1   4  186.68   15.90
  -1  -2   4  184.78   12.20
  -2   3   4  187.18   11.30
   3  -1   4  178.38   17.20
  -1  -2   4  172.98   13.40
   3  -1   4  183.18    9.10
  -1  -2   4  193.18   12.40
  -1  -2   4  174.78    8.30
  -2   3   4  164.08   19.30
   3  -1   4  172.78    9.40
   3  -1   4  178.88    9.20
  -2   3   4  175.98    9.70
  -1  -2   4  174.58   11.40
  -1  -2   4  191.38   24.60
  -1  -2   4  186.78   10.70
  -2   3   4  188.38   20.90
  -2   3   4  187.78   19.00
  -2   3   4  187.58    9.70
   3  -1   4  153.88   23.80
   3  -1   4  178.48   10.90
   4  -1  -4    1.10    2.70
  -3   4  -4    0.10    3.00
  -3   4  -4  -22.20    7.50
  -1  -3  -4   -9.90    7.20
   4  -1  -4    1.70    2.80
   4  -1  -4    0.60    2.90
  -3   4  -4    1.40    2.60
  -3   4  -4    3.70    2.60
  -3   4  -4    5.60    4.10
   4  -1  -4    1.70    2.70
  -1  -3  -4    6.70    8.30
  -3   4  -4    0.60    1.40
   4  -1  -4   14.90   14.80
   4  -1  -4    2.80    2.80
   1   3   4   -0.70    3.10
   3  -4   4    0.10    2.90
   3  -4   4   30.30   16.80
   1   3   4    3.00    1.90
  -4   1   4   -1.40    2.80
  -4   1   4   12.80   12.60
  -4   1   4    0.70    0.90
   1   3   4    3.60   10.10
  -4   1   4   11.40   10.10
   1   3   4    0.50    1.70
   1   3   4   -3.50   11.00
   3  -4   4   -3.70    2.80
   3  -4   4    1.00    2.60
   1   3   4    8.30    9.20
  -4   1   4    1.60    3.40
  -4   1   4    3.10    5.20
   1   3   4    1.40    1.80
   3  -4   4    1.10    3.10
  -4   1   4    3.30    4.00
   1   3   4   -1.10    3.00
   1   3   4   -6.80    7.50
   3  -4   4    3.10    4.80
   3  -4   4    1.30    2.20
  -4   1   4   -0.70    2.60
  -4   1   4    3.70    2.80
   3  -4   4   -0.10    3.70
  -3   7  -4   97.89   11.50
   7  -4  -4  120.99   24.30
   7  -4  -4  109.79   10.50
   7  -4  -4  112.29   20.10
   7  -4  -4  112.29   10.90
  -3   7  -4  142.89   12.40
  -4  -3  -4  129.59   16.70
  -4  -3  -4  131.99    8.70
  -3   7  -4  125.89   10.70
  -3   7  -4  151.68   18.80
  -3   7  -4  128.79   12.00
  -3   7  -4  134.19   11.60
  -4  -3  -4  158.38   20.90
   7  -4  -4  124.19   10.90
  -4  -3  -4  127.59    8.60
   3  -7   4  128.29   11.60
   4   3   4  128.89   10.20
   4   3   4  131.09    8.80
   4   3   4  128.39    6.10
   4   3   4  122.79    6.30
  -7   4   4  121.29   10.80
   4   3   4  168.78   23.10
  -7   4   4  121.09   11.00
   3  -7   4  116.29   15.50
   4   3   4  125.49    9.10
   3  -7   4  104.39   10.80
  -7   4   4  134.99   10.80
  -7   4   4  125.29   20.10
  -7   4   4  133.09   12.10
   3  -7   4  147.49   12.60
   3  -7   4  150.38   14.30
   4   3   4  136.39   21.30
  -7   4   4  116.49   12.30
   3  -7   4  119.19   11.60
   4   3   4  117.39   18.30
   3  -7   4  121.99    6.70
   4   3   4  119.69   11.60
   3  -7   4  103.69   25.20
   4   3   4  126.09   10.00
   0   4  -4   64.79    9.40
   4  -4  -4   65.19    6.30
   0   4  -4   62.89   10.30
   0   4  -4   72.49    6.70
   4  -4  -4   73.99   14.80
   0   4  -4   72.39    6.90
   4  -4  -4   61.49    6.00
   4  -4  -4   68.59   16.50
   0   4  -4   70.99    7.50
  -4   0  -4   68.79   13.30
  -4   0  -4   71.69   13.50
   0   4  -4   32.90   16.50
   4  -4  -4   70.69    7.40
  -4   4   4   56.59    6.70
  -4   4   4   58.99    6.40
   4   0   4   66.49    5.50
   0  -4   4   60.39    8.60
  -4   4   4   84.29   14.90
   0  -4   4   73.99    7.30
  -4   4   4   64.59    7.60
  -4   4   4   53.99    7.10
   4   0   4   68.59   12.10
   0  -4   4   78.19    8.00
  -4   4   4   67.79    6.10
  -4   4   4   53.99   12.70
   4   0   4   52.79   11.00
   4   0   4   58.29    5.40
  -4   4   4   68.19    4.80
   0  -4   4   64.29    9.00
   0  -4   4   70.39    8.40
   4   0   4   63.69    5.20
   4   0   4   73.29   18.30
   4   0   4   63.89    5.40
   0  -4   4   39.60   17.40
   0  -4   4   56.99    7.10
   4   0   4   79.19   16.40
   4   0   4   66.39    7.90
   3   1  -4    0.80    2.70
  -4   3  -4   -0.70    4.20
   3   1  -4   -5.10    3.30
   3   1  -4    1.70    3.10
   1  -4  -4    8.90   11.30
  -4   3  -4    2.80    2.40
  -4   3  -4   -1.20    2.60
  -4   3  -4  -11.70    7.60
   3   1  -4    8.80   14.00
   3   1  -4   -0.40    1.90
   3   1  -4    0.20    2.90
  -4   3  -4    4.00    6.10
   1  -4  -4   17.70    9.90
   4  -3   4   11.60    9.40
  -3  -1   4    2.60   12.80
  -1   4   4    0.10    2.70
  -1   4   4    8.40   10.00
  -1   4   4    4.40   10.00
  -3  -1   4    5.80    4.20
  -1   4   4    2.60    3.40
  -1   4   4   -2.90    7.60
   4  -3   4    4.50    3.80
  -3  -1   4    4.90    4.80
   4  -3   4    0.40    5.50
   4  -3   4    2.30    2.90
   4  -3   4   19.90   16.40
  -3  -1   4    2.00    3.00
  -3  -1   4   -3.30    3.10
  -1   4   4    2.50    2.40
  -1   4   4    3.20    1.90
   4  -3   4    0.80    2.70
  -3  -1   4    2.60   10.00
   4  -3   4    2.70    2.60
  -3  -1   4    1.10    2.40
  -1   4   4   22.40   10.70
  -3  -1   4    4.60    2.80
  -1   4   4    5.70    2.60
  -3  -1   4    3.60    3.10
  -1   4   4    2.40    2.30
   4  -3   4    0.00    3.20
  -3  -1   4    7.30    3.90
  -2  -4  -4  157.28   21.60
  -4   6  -4  133.89   11.10
   6  -2  -4  147.79   10.70
   6  -2  -4  135.19   24.80
  -2  -4  -4  121.59   16.60
  -2  -4  -4  134.59    7.90
  -4   6  -4  148.29   12.40
  -4   6  -4  144.59   10.10
  -4   6  -4  134.39   10.60
   6  -2  -4  128.49   11.40
  -2  -4  -4  139.09    8.00
  -4   6  -4  137.09   18.20
   6  -2  -4  138.09   10.50
   6  -2  -4  128.79   11.10
   4  -6   4  128.49   11.00
  -6   2   4  104.89   17.50
   4  -6   4  140.49   11.00
  -6   2   4  127.69   10.70
   2   4   4  136.79   16.50
  -6   2   4  123.49   10.50
   4  -6   4  150.98   12.00
   2   4   4  134.09   10.70
   4  -6   4  125.99   10.80
   4  -6   4  136.79   26.00
   4  -6   4  139.39   13.10
  -6   2   4  138.89   10.70
  -6   2   4  140.39   11.70
   2   4   4  156.18   20.90
  -6   2   4  122.49   12.40
   2   4   4  146.59    9.00
   2   4   4  128.29    9.80
   4  -6   4  135.39    8.20
   2   4   4  150.58    9.30
   2   4   4  188.28   21.60
   2   4   4  173.18   21.50
   9  -5  -4   10.70   19.40
   9  -5  -4    8.80    5.20
   9  -5  -4  -20.10   13.80
   9  -5  -4    9.20    6.80
  -5  -4  -4   -2.70   13.30
  -4   9  -4    9.90    7.50
  -4   9  -4   10.30    3.90
  -5  -4  -4   12.10   10.30
  -5  -4  -4    3.80    4.50
  -4   9  -4    5.80    5.30
  -5  -4  -4   13.00    4.80
   9  -5  -4    4.30    6.70
   9  -5  -4    0.80    5.30
  -4   9  -4   10.10    7.10
  -4   9  -4    3.70    7.40
  -4   9  -4    8.50    6.80
  -9   5   4   18.50    7.60
   5   4   4   10.70    5.80
  -9   5   4   -0.70   13.20
   4  -9   4    9.00    6.20
  -9   5   4    4.50    5.40
   5   4   4    7.80    6.00
   4  -9   4   10.60    6.60
   4  -9   4  -20.10   22.30
  -9   5   4   13.60    7.00
   4  -9   4   21.80    9.70
   4  -9   4    6.90    5.80
   4  -9   4   -1.40    5.80
   4  -9   4    7.40    3.00
   5   4   4   10.00    4.20
   5   4   4   38.60   18.30
   5   4   4    5.30    4.60
   5   4   4    7.30    5.60
   5   4   4   10.70   15.50
  -9   5   4    9.90    5.60
   4  -9   4    6.90    8.70
  -9   5   4   -1.00    7.00
   6  -5  -4  334.57   18.00
  -5  -1  -4  293.37   27.30
  -1   6  -4  305.27   23.00
  -1   6  -4  324.97   18.80
  -5  -1  -4  332.37   16.70
  -1   6  -4  328.77   18.90
  -1   6  -4  325.47   20.10
  -5  -1  -4  339.67   16.60
  -5  -1  -4  312.47   22.60
   6  -5  -4  326.27   33.10
   6  -5  -4  361.76   19.70
  -1   6  -4  345.27   20.00
   6  -5  -4  336.17   29.40
  -5  -1  -4  371.16   27.70
   6  -5  -4  360.86   18.50
  -1   6  -4  329.97   19.90
   6  -5  -4  334.87   17.90
   1  -6   4  331.27   36.10
   5   1   4  358.56   25.90
   5   1   4  324.57   17.50
   5   1   4  349.87   30.10
   5   1   4  330.67   17.10
  -6   5   4  337.67   27.40
   5   1   4  337.37   21.60
   5   1   4  332.77   15.60
   5   1   4  341.47   17.10
   1  -6   4  333.57   20.10
   1  -6   4  339.67   20.00
  -6   5   4  322.17   18.40
   1  -6   4  362.46   22.20
   1  -6   4  322.97   19.70
   5   1   4  335.77   19.90
   5   1   4  325.27   33.00
  -6   5   4  315.27   19.40
  -6   5   4  342.97   19.80
   5   1   4  332.17   18.10
   1  -6   4  329.97   21.60
   1  -6   4  316.07   19.00
  -6   5   4  304.47   18.20
  -6   5   4  344.27   19.50
  -5   2  -4   21.10    3.30
   2   3  -4   13.40    4.50
  -5   2  -4   18.10    3.70
   2   3  -4   12.60   15.40
   2   3  -4   21.20    4.70
  -5   2  -4   15.30    4.00
  -5   2  -4   41.20   12.10
   3  -5  -4   23.70    3.60
   3  -5  -4   13.60    4.90
  -5   2  -4   24.90    7.90
   3  -5  -4   19.40   11.60
   3  -5  -4   25.20   12.80
   2   3  -4   18.20    4.80
   3  -5  -4   20.60    3.50
   3  -5  -4   17.20    3.30
   2   3  -4   29.20    5.30
  -3   5   4   17.50    4.10
  -3   5   4   20.30    5.50
  -3   5   4   23.30   11.30
  -2  -3   4   19.10   14.80
  -3   5   4   27.30   11.50
  -2  -3   4   17.10    4.90
   5  -2   4   20.90    3.80
  -3   5   4   20.90    4.10
   5  -2   4   21.20    3.90
   5  -2   4   20.00    4.00
  -2  -3   4   17.90    5.10
  -3   5   4   22.10    4.90
   5  -2   4   20.40    8.60
   5  -2   4   11.10    3.80
   5  -2   4   23.50    4.60
   5  -2   4   14.50   11.60
  -2  -3   4   24.70    5.20
  -2  -3   4   20.60    5.70
   5  -2   4   21.70    7.30
  -3   5   4   20.50    3.80
  -2  -3   4   18.90    5.10
  -2  -3   4   20.80    5.00
  -3   5   4   -5.80    9.40
   0  -5  -4 1048.20   45.50
  -5   5  -4 1035.20   56.89
   5   0  -4 1013.70   47.90
  -5   5  -4 1048.00   45.90
   5   0  -4 1000.20   47.80
   5   0  -4  994.10   48.20
  -5   5  -4 1120.49   48.90
   0  -5  -4 1167.28   58.19
   0  -5  -4 1072.69   45.50
   0  -5  -4 1063.09   48.10
  -5   5  -4 1029.10   47.30
   5   0  -4 1013.20   63.79
   0  -5  -4 1091.69   56.99
   0  -5  -4 1122.29   58.09
   5   0  -4 1042.50   46.70
  -5   5  -4 1042.30   46.00
  -5   5  -4 1039.50   47.90
   5  -5   4 1083.19   46.90
  -5   0   4  952.30   45.00
   0   5   4 1038.60   47.20
   0   5   4 1071.69   46.50
  -5   0   4  998.50   48.70
   0   5   4 1082.39   46.60
  -5   0   4 1031.70   61.29
   5  -5   4 1050.79   48.10
   0   5   4 1105.59   48.30
   0   5   4 1069.79   55.49
   5  -5   4 1048.90   47.90
   0   5   4 1097.29   56.89
  -5   0   4  933.51   45.20
   0   5   4 1031.20   46.50
   5  -5   4 1047.30   48.50
   0   5   4 1131.89   55.29
   0   5   4 1096.79   49.00
   5  -5   4 1056.89   48.20
  -5   0   4 1001.80   47.20
  -5   0   4  963.40   56.89
   0   5   4 1023.40   56.99
  -5   0   4 1004.30   49.50
  -5   0   4  962.80   48.00
  -5   0   4  986.20   48.30
  -3  -5  -4   98.29   18.70
   8  -3  -4   88.39   10.20
  -3  -5  -4   91.09    8.30
  -5   8  -4  105.09   10.10
  -5   8  -4  107.59   19.60
  -5   8  -4   99.29   11.60
   8  -3  -4   82.69   10.40
  -5   8  -4   93.29   11.60
   8  -3  -4   66.19    9.30
  -3  -5  -4   84.69   15.50
  -5   8  -4   86.49   11.10
   8  -3  -4  105.09   25.10
  -5   8  -4   89.29   12.50
  -3  -5  -4   94.29   11.30
  -3  -5  -4   90.89    8.10
   8  -3  -4   88.19   10.40
   8  -3  -4   97.49   11.80
   5  -8   4   84.99    7.10
   5  -8   4   87.19   13.40
   3   5   4  102.59   20.80
   3   5   4   97.79    5.30
   3   5   4   80.69   17.00
   3   5   4  107.89   10.70
   5  -8   4   97.59   25.00
  -8   3   4   99.49   10.70
  -8   3   4   96.69   11.80
   3   5   4   79.69    8.30
   5  -8   4   93.49   11.40
   5  -8   4   87.59   11.00
   5  -8   4  115.39   14.30
   3   5   4   86.19    5.10
   3   5   4   63.19   16.90
  -8   3   4   94.69   12.00
   3   5   4  100.49   10.70
   5  -8   4   95.79   11.40
  -8   3   4   81.39   10.10
  -8   3   4  109.69   18.60
  -8   3   4   98.29   11.10
   5  -8   4   94.59   11.40
  -6  -5  -4  834.52   41.30
  -6  -5  -4  840.12   41.50
  -6  -5  -4  878.11   49.20
  11  -6  -4  850.11   43.60
  -5  11  -4  864.21   44.50
  11  -6  -4  868.41   45.00
  -6  -5  -4  900.91   56.29
  -5  11  -4  868.01   39.90
  -5  11  -4  836.82   54.99
  -5  11  -4  835.62   45.90
  11  -6  -4  801.42   43.50
  11  -6  -4  859.41   43.60
  -5  11  -4  794.12   45.10
  11  -6  -4  992.50   67.09
   6   5   4  860.51   43.10
   6   5   4  843.32   52.29
   5 -11   4  829.52   44.90
   5 -11   4  852.31   44.60
   6   5   4  861.31   44.60
 -11   6   4  837.72   43.80
 -11   6   4  835.32   45.40
   6   5   4  820.02   41.40
   5 -11   4  798.92   48.10
   5 -11   4  873.81   49.10
   6   5   4  911.31   59.79
   6   5   4  910.41   42.20
   5 -11   4  755.32   68.29
   5 -11   4  788.92   38.90
 -11   6   4  882.01   45.90
   5 -11   4  823.82   44.10
   5 -11   4  875.01   45.20
   6   5   4  906.81   44.70
 -11   6   4  842.72   44.60
 -11   6   4  783.92   53.09
 -11   6   4  805.92   43.90
  -6  -2  -4  632.94   41.40
  -2   8  -4  631.64   32.70
  -6  -2  -4  659.93   41.50
  -6  -2  -4  592.54   34.10
  -2   8  -4  602.54   31.60
  -6  -2  -4  606.44   29.10
  -6  -2  -4  619.44   29.00
   8  -6  -4  588.14   31.10
   8  -6  -4  576.24   31.10
   8  -6  -4  575.44   30.90
   8  -6  -4  596.84   42.00
  -2   8  -4  646.14   33.10
  -2   8  -4  561.74   31.50
  -2   8  -4  562.14   32.00
   8  -6  -4  641.24   31.00
   8  -6  -4  638.04   47.60
  -2   8  -4  588.14   26.40
   2  -8   4  608.34   35.20
  -8   6   4  589.94   30.90
   6   2   4  616.84   29.40
   6   2   4  588.84   30.30
   2  -8   4  581.54   31.60
   2  -8   4  604.04   34.50
   6   2   4  613.34   44.40
   6   2   4  585.14   30.10
  -8   6   4  550.94   31.80
  -8   6   4  569.34   39.50
  -8   6   4  577.94   31.30
   2  -8   4  601.14   32.40
   6   2   4  602.64   29.40
   6   2   4  614.14   32.10
   2  -8   4  566.84   28.00
   2  -8   4  607.94   32.30
   6   2   4  597.44   43.70
  -8   6   4  574.84   30.70
   2  -8   4  588.74   32.30
   2  -8   4  602.04   49.10
  -8   6   4  628.14   32.70
  -6   1  -4  340.17   28.90
   5  -6  -4  354.36   31.70
   5  -6  -4  324.57   17.60
   5  -6  -4  321.57   16.10
   1   5  -4  323.77   20.10
   5  -6  -4  324.77   17.80
   1   5  -4  326.07   18.80
  -6   1  -4  347.87   25.70
  -6   1  -4  341.57   16.60
   5  -6  -4  331.47   16.00
  -6   1  -4  322.87   16.90
  -6   1  -4  323.17   16.60
   5  -6  -4  352.96   29.90
   1   5  -4  320.07   20.50
   1   5  -4  329.17   33.00
   1   5  -4  333.77   18.90
   5  -6  -4  344.87   19.40
   5  -6  -4  316.77   15.90
   6  -1   4  323.97   18.00
   6  -1   4  317.27   29.10
  -1  -5   4  306.87   35.10
   6  -1   4  336.47   18.20
  -1  -5   4  351.96   19.40
  -1  -5   4  332.37   19.90
   6  -1   4  322.87   21.50
  -5   6   4  330.87   18.00
  -5   6   4  316.17   16.90
  -1  -5   4  311.17   20.00
  -5   6   4  349.17   19.30
  -1  -5   4  310.37   21.10
  -1  -5   4  319.17   19.80
  -5   6   4  309.87   28.00
   6  -1   4  345.17   17.40
  -5   6   4  295.67   26.30
   6  -1   4  350.46   17.40
  -5   6   4  299.07   19.30
  -5   6   4  336.37   18.20
  -1  -5   4  359.86   20.40
  -6   4  -4  137.99   10.50
  -6   4  -4  141.39   20.80
  -6   4  -4  146.69    7.40
   2  -6  -4  173.18   22.30
   2  -6  -4  147.09   21.00
   2  -6  -4  137.79    9.00
  -6   4  -4  136.59   10.80
  -6   4  -4  136.09   14.50
   4   2  -4  131.39    8.40
   4   2  -4  172.88   26.90
   2  -6  -4  133.89    9.00
   4   2  -4  157.28   11.80
   4   2  -4  146.19   11.30
  -6   4  -4  141.79    9.60
   4   2  -4  133.89   10.60
   2  -6  -4  143.79   10.10
  -6   4  -4  137.19    7.40
   4   2  -4  149.79   12.30
  -2   6   4  141.29    9.50
   6  -4   4  135.69   10.20
  -4  -2   4  127.19   13.20
  -2   6   4  149.79   11.20
  -4  -2   4  131.69   11.60
   6  -4   4  140.69   11.70
  -2   6   4  153.38   18.60
  -2   6   4  131.69    9.70
   6  -4   4  149.19   10.50
  -2   6   4  137.29   20.70
  -2   6   4  144.29   11.40
  -4  -2   4  146.39   11.70
  -4  -2   4  140.69    9.60
  -4  -2   4  154.38   11.50
   6  -4   4  138.39   12.50
  -2   6   4  154.88   10.60
   6  -4   4  148.89   10.90
  -2   6   4  132.59   10.00
  -4  -2   4  171.58   25.10
   6  -4   4  141.69   10.50
  -4  -2   4  129.19   11.80
  -6   7  -4   18.40   13.20
   7  -1  -4   10.50    5.60
   7  -1  -4   15.60    4.90
  -1  -6  -4   21.80   12.20
  -1  -6  -4   16.00    4.20
  -1  -6  -4   17.10    4.10
  -6   7  -4   13.80    5.50
   7  -1  -4   17.20    6.80
  -6   7  -4   14.60    5.80
  -1  -6  -4   14.30    5.90
  -6   7  -4   13.50    5.30
   7  -1  -4   18.60    5.30
   7  -1  -4   28.30   18.80
   7  -1  -4   10.30    6.50
  -1  -6  -4   15.60   12.00
  -6   7  -4   20.90    5.50
   6  -7   4   16.00    5.80
   1   6   4   37.90   15.10
  -7   1   4   10.60    5.00
  -7   1   4   16.90    6.60
  -7   1   4   16.70    5.30
   1   6   4    5.90   13.80
   1   6   4    7.90    5.00
   1   6   4   13.30    4.00
   1   6   4   17.00    4.80
   1   6   4    9.90    4.90
   6  -7   4    7.70    5.20
   6  -7   4   18.60    5.80
   1   6   4   13.80    5.70
   1   6   4   17.80    9.80
   6  -7   4   18.10    4.40
  -7   1   4   12.70    3.50
  -7   1   4   -1.40   12.70
   1   6   4   11.30    4.40
   6  -7   4   10.20    5.40
  -7   1   4   17.40    6.00
   1   6   4   -1.10    4.80
  -7   1   4    4.30    6.70
   6  -7   4   10.30    6.70
  10  -4  -4   43.10   23.60
  10  -4  -4   23.60   10.50
  10  -4  -4   25.80    7.50
  -6  10  -4   36.70   16.40
  -6  10  -4   24.00    8.20
  -4  -6  -4   18.80    8.40
  -4  -6  -4   18.40   16.60
  -6  10  -4   49.70   10.70
  -4  -6  -4   17.20   13.60
  -6  10  -4   36.80    9.00
  -6  10  -4   30.00    6.30
  -4  -6  -4   21.50    6.10
  -6  10  -4   29.50    8.80
  10  -4  -4   25.90    8.10
  -6  10  -4   32.70    7.40
  10  -4  -4   42.10    8.80
  -4  -6  -4   39.20    7.00
  10  -4  -4   45.40   10.60
 -10   4   4   31.00    9.10
 -10   4   4   24.90    8.80
   4   6   4   26.80    7.90
   4   6   4   23.00    8.70
 -10   4   4   26.60    7.50
   6 -10   4   -2.70   26.20
   4   6   4   26.40    6.60
   6 -10   4   36.10    5.40
   4   6   4   21.40   20.30
   6 -10   4   42.80    9.50
 -10   4   4   26.90    7.00
   4   6   4   15.70   17.40
 -10   4   4   28.10   17.50
   6 -10   4   25.30    8.20
   4   6   4   35.20    6.90
   6 -10   4   31.30    8.10
   4   6   4   25.90   12.60
   6 -10   4   37.50    9.10
   6 -10   4   24.70   12.50
   6 -10   4   18.00   10.50
 -10   4   4   32.90   10.80
   4   6   4   28.00    7.50
  13  -7  -4   17.90   11.90
  -7  -6  -4   10.30    8.80
  -7  -6  -4   17.50    5.50
  -7  -6  -4   39.80   16.40
  -6  13  -4   26.30   13.50
  -6  13  -4   31.20   14.50
  -6  13  -4   25.20    7.40
  -7  -6  -4   32.60   25.40
  13  -7  -4   25.50    9.80
  -6  13  -4   15.80    8.60
  13  -7  -4   19.50   33.00
   6 -13   4    5.20    9.00
   7   6   4   25.10   12.50
   7   6   4   16.70   12.50
   6 -13   4   29.20   15.20
   7   6   4   17.90   10.50
   6 -13   4   38.30   12.30
   7   6   4   33.90   18.60
   6 -13   4   30.10   41.00
   7   6   4   45.60   13.50
 -13   7   4   29.90   11.50
 -13   7   4   28.70   10.80
 -13   7   4   23.10   13.40
 -13   7   4    9.00   21.00
   6 -13   4   35.00   11.90
   7   6   4   20.60    8.80
  -7  -3  -4   10.40   15.00
  -3  10  -4   -4.80    8.50
  10  -7  -4    6.70    5.40
  -7  -3  -4   -1.50    5.80
  -7  -3  -4    9.10    9.40
  -3  10  -4    3.80    7.70
  10  -7  -4   -1.80    7.10
  -7  -3  -4    8.40    5.60
  -7  -3  -4    1.20   13.50
  10  -7  -4  -15.50   19.10
  10  -7  -4    1.10    7.50
  -3  10  -4   -1.50    4.20
  -3  10  -4   18.50    9.30
  -3  10  -4  -13.50    8.20
  10  -7  -4   10.80    7.40
  -3  10  -4    0.10    6.70
  10  -7  -4   -8.00    8.30
  10  -7  -4   -0.80   15.60
   7   3   4   -0.40    7.10
 -10   7   4   -2.30    7.20
 -10   7   4    9.10    7.30
   3 -10   4  -13.70    9.30
   7   3   4    5.70    7.00
   3 -10   4    3.00   12.20
   3 -10   4    8.80    7.20
   7   3   4    4.20   19.80
   7   3   4    0.70    4.70
 -10   7   4   12.70   15.60
   3 -10   4    0.90    6.90
 -10   7   4   -6.30    5.40
   7   3   4    0.10    6.60
   3 -10   4    6.90    7.20
   3 -10   4  -11.00   23.50
   7   3   4    2.70    4.90
 -10   7   4   -6.80    6.80
 -10   7   4    9.20    8.60
   3 -10   4   -0.20    7.30
   0   7  -4   21.30    6.80
  -7   0  -4   21.60    5.20
   7  -7  -4   31.90    6.70
   0   7  -4   23.60    8.10
   7  -7  -4   23.60    3.30
  -7   0  -4   14.40   12.20
   7  -7  -4   36.10   15.20
   0   7  -4   31.80    8.80
   0   7  -4   21.10    5.70
   7  -7  -4   22.90    5.50
   7  -7  -4   17.30    6.10
  -7   0  -4   21.20   14.40
   7  -7  -4   23.40    6.90
   0   7  -4   35.40    8.40
   7  -7  -4   38.00   19.00
   0   7  -4   14.60    6.70
  -7   7   4   30.40   13.80
   7   0   4   67.89   19.30
   0  -7   4    1.80   18.70
   0  -7   4   13.80    8.20
   7   0   4   29.00    5.60
  -7   7   4   14.10   14.80
   7   0   4   28.10    6.90
   7   0   4   20.80    6.20
  -7   7   4   17.70    6.90
   7   0   4   26.20    3.60
   0  -7   4   17.60    6.20
   0  -7   4   25.70    7.90
   0  -7   4   30.60    7.90
   0  -7   4   26.00    7.60
   0  -7   4   33.00    7.40
   7   0   4   26.90    5.30
  -7   7   4   33.40    7.30
  -7   7   4   22.20    6.30
  -7   7   4   29.00    6.70
  -7   7   4   29.10    6.50
   7   0   4   25.20    6.60
   4  -7  -4  125.79   20.10
   4  -7  -4  156.68   23.40
  -7   3  -4  143.89   21.10
   3   4  -4  117.29    6.90
   3   4  -4  124.09   11.10
   4  -7  -4  124.49    9.50
  -7   3  -4  133.59    9.90
   3   4  -4  121.39    7.20
   3   4  -4  149.39   12.80
   3   4  -4  116.59   11.20
  -7   3  -4  127.39    9.50
   3   4  -4  125.79   11.80
   3   4  -4   82.79   23.00
   4  -7  -4  131.39    9.20
  -7   3  -4  155.68   16.30
  -7   3  -4  130.89    9.90
   4  -7  -4  136.39    9.70
   4  -7  -4  161.78   12.70
  -4   7   4  130.49   10.40
   7  -3   4  129.39    9.80
  -3  -4   4  122.09   24.30
  -4   7   4  130.19   12.00
  -3  -4   4  124.69   14.20
  -4   7   4  143.29   10.10
  -4   7   4  131.19   11.30
   7  -3   4  128.39   12.00
  -4   7   4  119.89    9.90
  -3  -4   4  114.89   11.20
   7  -3   4  121.69    9.40
   7  -3   4  132.29   15.10
  -3  -4   4  112.59   11.30
  -4   7   4  137.79   19.20
   7  -3   4  118.59    9.90
   7  -3   4  123.29   20.30
  -4   7   4  118.19   19.90
  -3  -4   4  125.19   11.80
   7  -3   4  126.39   10.80
   7  -3   4  150.28   13.60
  -4   7   4  107.99   13.10
  -3  -4   4  118.29   12.30
  -7   6  -4    6.30    5.20
   6   1  -4    8.90    4.50
   1  -7  -4   16.20   12.30
  -7   6  -4   24.30   14.50
  -7   6  -4   18.20    4.80
   6   1  -4   15.20    5.60
   6   1  -4   26.30   19.40
  -7   6  -4   13.50    6.70
   1  -7  -4    8.20    4.90
   1  -7  -4   18.50   13.30
  -7   6  -4   17.70    4.70
   6   1  -4    6.20    4.60
  -7   6  -4   19.90    5.90
   6   1  -4   11.20    6.20
   1  -7  -4   15.20    4.80
  -7   6  -4   14.00    4.60
   1  -7  -4   18.70    4.20
   1  -7  -4   16.80   12.70
   6   1  -4    1.70    5.90
   7  -6   4    4.00    5.50
  -1   7   4   13.50    4.50
   7  -6   4   15.50    5.40
  -1   7   4    9.00    5.10
  -6  -1   4   16.90    5.40
  -6  -1   4   15.00    3.40
   7  -6   4   21.90    5.70
  -1   7   4   20.40   13.40
  -1   7   4   12.20    4.10
   7  -6   4   12.80    5.20
  -6  -1   4   39.20   14.70
  -6  -1   4    3.90    5.70
  -1   7   4    9.90   13.60
  -1   7   4    9.70    5.10
   7  -6   4   11.80    5.40
  -1   7   4   19.90    6.20
  -1   7   4   14.90    5.80
  -6  -1   4   16.40    7.50
   9  -2  -4  337.17   23.90
  -7   9  -4  352.86   22.10
  -7   9  -4  338.87   20.80
  -2  -7  -4  304.97   31.30
  -2  -7  -4  361.76   22.30
   9  -2  -4  303.77   39.00
   9  -2  -4  330.77   21.00
   9  -2  -4  317.97   20.60
  -2  -7  -4  329.47   19.10
  -7   9  -4  367.06   22.90
   9  -2  -4  314.17   16.00
  -7   9  -4  329.17   21.30
   9  -2  -4  313.07   21.70
  -2  -7  -4  398.36   34.50
  -7   9  -4  314.67   33.40
  -7   9  -4  348.77   21.90
  -2  -7  -4  348.67   18.90
   9  -2  -4  295.77   23.10
   7  -9   4  343.97   21.60
   2   7   4  338.77   19.70
  -9   2   4  317.97   19.00
   2   7   4  353.36   22.10
  -9   2   4  286.77   21.50
   7  -9   4  370.76   22.30
   2   7   4  364.26   20.90
   2   7   4  379.36   22.10
   2   7   4  345.77   21.60
  -9   2   4  295.47   22.50
  -9   2   4  311.37   21.40
   7  -9   4  320.57   25.10
  -9   2   4  302.87   23.60
   7  -9   4  352.06   21.80
   7  -9   4  323.57   22.30
  -9   2   4  275.77   30.20
   2   7   4  336.87   19.50
   2   7   4  369.26   23.20
   2   7   4  340.47   16.30
  -9   2   4  312.77   21.00
  -7  12  -4   22.10    7.50
  12  -5  -4   24.80    9.60
  -5  -7  -4   28.90   16.00
  12  -5  -4   11.50   10.50
  12  -5  -4   41.60   12.40
  -7  12  -4   12.00   11.60
  -7  12  -4    9.10    9.40
  -5  -7  -4   25.50    4.40
  -5  -7  -4   29.70   21.30
  12  -5  -4   59.19   27.60
  12  -5  -4   11.60   12.60
  -5  -7  -4   23.40    4.40
  -5  -7  -4   32.20    8.70
  -7  12  -4   38.30   11.40
   7 -12   4   27.50    9.40
   5   7   4   36.90   10.30
   7 -12   4   21.90   10.80
 -12   5   4   19.90    9.50
   5   7   4   36.20   10.90
   5   7   4   41.90    8.90
   7 -12   4   29.70   10.70
 -12   5   4   38.40   20.40
   5   7   4   27.20    7.80
 -12   5   4   41.20   11.40
 -12   5   4   48.80   11.50
   5   7   4   22.80   11.10
   7 -12   4   38.60   11.20
   7 -12   4   28.40    6.80
   5   7   4   18.10   10.00
   7 -12   4    9.90   35.10
 -12   5   4   23.70    8.50
  -7  15  -4  157.98   17.70
  15  -8  -4  164.68   47.60
  -8  -7  -4  207.58   37.80
  -8  -7  -4  148.09   16.30
  15  -8  -4  193.98   23.50
  15  -8  -4  140.49   10.00
  -7  15  -4  190.08   24.90
  15  -8  -4  156.78   12.40
  -8  -7  -4  185.08   14.80
  -8  -7  -4  200.08   27.80
  -8  -7  -4  168.58   19.20
  -7  15  -4  173.68   29.70
  15  -8  -4  174.68   23.20
   8   7   4  168.08   19.90
   7 -15   4  226.98   26.30
   8   7   4  167.28   21.20
   7 -15   4  173.08   20.80
   7 -15   4  188.48   25.80
 -15   8   4  133.79   20.60
 -15   8   4  178.68   22.80
   8   7   4  169.78   22.50
   8   7   4  167.68   23.80
 -15   8   4  158.48   22.30
   8   7   4  191.58   21.40
   7 -15   4  230.68   25.00
  -8  -4  -4   74.79   11.00
  12  -8  -4   73.49    5.70
  12  -8  -4   62.69    4.90
  -4  12  -4   78.79    8.90
  12  -8  -4   82.39   15.30
  -8  -4  -4   78.29   15.70
  12  -8  -4   45.40   28.70
  -8  -4  -4   83.89   23.70
  -4  12  -4   70.09   13.90
  -4  12  -4   72.89   14.90
  12  -8  -4   91.39   13.20
  -8  -4  -4   64.99    6.70
  12  -8  -4   85.39   23.00
  12  -8  -4   66.79   13.20
  -4  12  -4   66.79   11.10
 -12   8   4   89.69   13.90
   4 -12   4   74.09   13.40
   8   4   4   41.90   23.40
   8   4   4   80.99   14.00
   8   4   4   93.99   12.10
 -12   8   4   58.49   20.20
   8   4   4   88.69   14.10
 -12   8   4   66.39   13.50
   4 -12   4   68.19   35.90
 -12   8   4  100.69   14.40
   8   4   4   93.39   13.40
   4 -12   4  111.99   15.40
   8   4   4   76.29   11.20
 -12   8   4   77.39   13.40
   4 -12   4   73.59   13.00
   4 -12   4   68.29   13.00
  -1   9  -4  316.37   22.30
  -1   9  -4  265.87   20.60
  -8  -1  -4  284.77   18.10
   9  -8  -4  287.27   18.80
  -1   9  -4  270.67   21.40
  -1   9  -4  272.57   20.50
  -8  -1  -4  313.77   29.90
   9  -8  -4  304.27   14.50
  -8  -1  -4  313.07   31.40
   9  -8  -4  348.77   20.00
  -1   9  -4  270.07   14.30
   9  -8  -4  327.97   20.80
   9  -8  -4  331.67   35.50
   9  -8  -4  337.17   22.20
   9  -8  -4  405.46   39.50
  -8  -1  -4  312.27   18.40
  -1   9  -4  321.77   23.30
   8   1   4  306.87   20.30
   8   1   4  293.77   20.30
   1  -9   4  267.27   21.60
  -9   8   4  320.37   22.30
  -9   8   4  358.26   22.80
  -9   8   4  315.87   19.80
   1  -9   4  256.37   21.40
   8   1   4  287.77   20.20
  -9   8   4  288.47   20.10
   1  -9   4  284.37   20.90
   8   1   4  302.67   35.00
   8   1   4  278.37   17.90
   1  -9   4  282.37   20.10
   8   1   4  268.67   17.80
  -9   8   4  280.67   20.10
  -9   8   4  359.26   31.60
   1  -9   4  292.97   21.40
   1  -9   4  322.87   40.20
   1  -9   4  214.28   24.10
   2   6  -4  593.24   32.90
  -8   2  -4  569.64   28.90
   6  -8  -4  580.94   29.70
   6  -8  -4  580.24   31.10
   2   6  -4  578.64   25.90
   6  -8  -4  581.64   29.50
  -8   2  -4  606.54   37.90
   6  -8  -4  604.04   28.60
  -8   2  -4  602.74   27.90
  -8   2  -4  587.14   26.00
  -8   2  -4  588.74   42.90
   6  -8  -4  584.24   29.20
   2   6  -4  582.64   26.10
   6  -8  -4  592.74   42.20
   2   6  -4  574.44   31.20
   6  -8  -4  589.64   28.00
   6  -8  -4  624.54   44.00
   2   6  -4  635.44   48.90
  -8   2  -4  576.54   26.00
   2   6  -4  552.74   30.30
  -8   2  -4  586.74   29.20
   2   6  -4  588.74   31.30
  -2  -6   4  604.14   32.50
   8  -2   4  518.25   41.70
  -2  -6   4  541.75   33.70
   8  -2   4  594.44   29.60
  -2  -6   4  611.04   31.90
   8  -2   4  643.74   31.00
  -2  -6   4  616.84   31.60
   8  -2   4  595.74   28.20
  -6   8   4  570.24   29.70
  -6   8   4  590.54   31.30
  -2  -6   4  568.24   31.20
  -6   8   4  604.74   30.60
  -2  -6   4  597.74   32.10
  -6   8   4  610.44   31.40
   8  -2   4  616.54   30.70
   8  -2   4  563.34   29.60
   8  -2   4  597.14   29.50
  -6   8   4  567.84   38.30
  -6   8   4  535.95   40.50
  -6   8   4  583.84   32.10
  -6   8   4  615.14   30.30
  -2  -6   4  621.94   47.90
   3  -8  -4   94.79    9.10
  -8   5  -4   90.89   12.50
  -8   5  -4  110.29   21.40
   5   3  -4  110.69   12.20
   3  -8  -4   90.49    8.80
  -8   5  -4  103.29    9.00
  -8   5  -4  100.49   10.10
   5   3  -4   98.99   25.70
  -8   5  -4  102.89    8.50
   3  -8  -4   87.89   18.80
   3  -8  -4  101.69   19.90
   5   3  -4  108.49   10.80
   5   3  -4   82.79   10.10
   3  -8  -4   96.79    9.60
   5   3  -4   91.49    8.10
  -8   5  -4   81.19   10.20
   5   3  -4   99.49   12.60
   5   3  -4   77.69   10.20
  -8   5  -4   97.59    9.00
  -5  -3   4   86.79   11.70
  -5  -3   4   94.09   22.60
   8  -5   4  123.19   10.10
  -5  -3   4   81.79   12.50
  -3   8   4   81.69    8.90
  -5  -3   4   87.89   10.90
  -5  -3   4   93.49   11.70
   8  -5   4   89.69    9.80
  -3   8   4   98.09   10.60
  -5  -3   4   94.79    9.10
  -3   8   4   73.49   10.20
   8  -5   4   97.09    9.60
  -3   8   4   92.09   10.20
   8  -5   4   94.79   11.10
  -3   8   4   96.79   20.00
   8  -5   4   99.39   12.30
  -3   8   4   79.49    9.80
   8  -5   4  116.09   12.00
  -5  -3   4   98.69   12.60
  -3   8   4   86.79   10.10
  -3   8   4   99.29    9.60
   0  -8  -4 1135.69   63.39
  -8   8  -4 1104.19   51.99
   8   0  -4 1013.20   51.59
   8   0  -4  985.70   52.09
   8   0  -4 1046.90   50.19
   0  -8  -4 1048.30   61.69
   8   0  -4 1055.29   53.59
   0  -8  -4 1035.90   49.40
   8   0  -4  981.30   68.79
  -8   8  -4 1138.39   51.09
   0  -8  -4 1106.69   51.59
  -8   8  -4 1108.89   50.59
  -8   8  -4 1099.59   64.39
   8   0  -4 1056.49   51.59
  -8   8  -4 1027.70   50.79
   0  -8  -4 1085.99   49.40
   0   8   4 1102.99   50.99
   0   8   4  995.90   61.19
  -8   0   4 1015.10   51.99
  -8   0   4 1055.39   52.89
  -8   0   4 1043.80   52.29
   8  -8   4  991.20   53.29
   0   8   4 1122.19   52.59
   0   8   4 1174.28   52.59
  -8   0   4 1040.80   62.79
   0   8   4 1105.79   48.70
   8  -8   4 1129.79   50.19
   0   8   4 1141.99   52.69
  -8   0   4  999.80   53.99
   0   8   4 1047.00   49.99
   8  -8   4 1085.09   51.89
   8  -8   4 1116.59   52.89
   8  -8   4 1113.29   51.89
   0   8   4 1060.19   50.39
   8  -8   4 1114.29   52.19
  11  -3  -4   35.60   11.80
  -8  11  -4   19.60   10.70
  11  -3  -4   41.70   27.50
  11  -3  -4   17.30    4.10
  -8  11  -4   13.70   10.20
  -3  -8  -4   25.40   16.10
  11  -3  -4   32.10   10.40
  11  -3  -4   27.30    9.70
  -3  -8  -4    4.30   19.20
  -3  -8  -4   23.30    7.40
  11  -3  -4   23.90    8.10
  -3  -8  -4   10.70    7.10
  -8  11  -4   25.00   21.50
  -3  -8  -4    8.10    9.60
  -8  11  -4   25.70    8.40
  -8  11  -4   16.80    9.80
  -8  11  -4   16.80   10.90
  -8  11  -4   14.80    7.40
  11  -3  -4   11.50   10.50
   8 -11   4   21.40    8.70
 -11   3   4   41.50   10.40
 -11   3   4   17.70   18.60
   3   8   4    6.10    8.50
   3   8   4   15.10    8.40
   8 -11   4   19.00    9.20
   3   8   4  -10.80   25.80
   8 -11   4   17.40    9.40
   8 -11   4   16.10   14.00
   8 -11   4   32.40    9.50
   3   8   4   32.00    7.70
   8 -11   4   12.00    6.30
   3   8   4   25.50   10.70
 -11   3   4   10.70    7.00
 -11   3   4   17.00   12.40
 -11   3   4   20.00   10.60
   3   8   4   20.50    9.10
  14  -6  -4  293.97   17.90
  -6  -8  -4  323.57   24.70
  14  -6  -4  312.67   16.40
  -6  -8  -4  360.36   45.20
  -8  14  -4  343.17   23.60
  -8  14  -4  329.77   27.20
  -6  -8  -4  365.56   39.20
  14  -6  -4  296.77   52.19
  -6  -8  -4  333.67   18.60
  -6  -8  -4  314.87   19.20
  -8  14  -4  325.17   31.70
  14  -6  -4  330.47   26.50
  14  -6  -4  376.86   31.10
   8 -14   4  341.17   21.40
   8 -14   4  324.17   29.20
   8 -14   4  288.07   25.90
   8 -14   4  288.37   28.80
 -14   6   4  315.77   29.10
   6   8   4  334.37   27.60
   6   8   4  372.16   25.10
 -14   6   4  355.36   43.40
 -14   6   4  358.26   30.20
   8 -14   4  299.17   36.90
 -14   6   4  292.07   27.20
 -14   6   4  330.27   32.80
   6   8   4  342.07   23.70
   6   8   4  431.86   31.50
  -9  -8  -4   69.69   26.80
  -8  17  -4   21.50   16.80
  -8  17  -4   37.70   13.00
  17  -9  -4   24.00   45.60
  17  -9  -4   30.50   21.30
  -8  17  -4   27.50   23.00
  -9  -8  -4   29.50   35.20
  17  -9  -4   31.40   16.70
   9   8   4   28.80   12.60
   9   8   4   18.40   20.60
 -17   9   4   24.70   15.40
   8 -17   4   22.20   18.80
 -17   9   4   25.80   19.30
   9   8   4   23.20   16.70
   8 -17   4    9.50   17.20
 -17   9   4  -15.40   28.30
   8 -17   4    5.30   16.50
 -17   9   4   40.60   20.30
  -9  -5  -4   87.79   14.20
  -5  14  -4   70.39    9.60
  14  -9  -4   76.09   16.00
  14  -9  -4   77.89    6.80
  14  -9  -4   48.80   18.30
  -9  -5  -4   76.99    9.00
  -5  14  -4   60.59   12.90
  14  -9  -4   64.79    8.90
  -9  -5  -4   55.99   17.40
  14  -9  -4   77.59   14.70
  14  -9  -4  115.29   29.90
  -9  -5  -4   80.39    9.70
  14  -9  -4  100.09   38.30
  -9  -5  -4   36.80   26.80
   5 -14   4  106.59   19.60
   9   5   4   75.49   14.60
 -14   9   4   85.39   16.70
   5 -14   4  147.69   47.80
   5 -14   4   64.29   14.90
   5 -14   4   35.60   14.70
 -14   9   4   96.49   16.10
   9   5   4   66.29   16.80
   9   5   4  105.39   29.10
   9   5   4   71.99   12.90
   5 -14   4   81.29   14.30
   9   5   4   77.69   12.50
 -14   9   4   85.49   18.20
 -14   9   4   79.39   15.90
  -2  11  -4   27.00   11.70
  11  -9  -4   29.60   19.60
  11  -9  -4   19.90    7.60
  -2  11  -4   23.90   12.80
  11  -9  -4    5.10    8.40
  -9  -2  -4   14.90   18.00
  -2  11  -4    9.90    6.90
  -2  11  -4   23.70    4.90
  -9  -2  -4   26.60    5.00
  11  -9  -4   -4.80   10.60
  -9  -2  -4   25.80    8.40
  11  -9  -4    9.20   10.80
  -2  11  -4   29.60   11.90
  11  -9  -4  -24.20   22.40
  11  -9  -4   28.40    4.60
  -9  -2  -4   37.90   18.30
 -11   9   4   29.60   10.30
 -11   9   4   25.10    8.10
 -11   9   4  -17.20   17.90
   9   2   4   29.20   10.30
   2 -11   4   27.80   10.30
   2 -11   4   14.40    9.30
   2 -11   4   25.10   11.60
 -11   9   4   22.90    8.90
   2 -11   4   11.40    7.00
   9   2   4   13.50    8.00
   9   2   4   11.10    6.50
   2 -11   4    6.50   28.10
   9   2   4   23.00    9.90
   2 -11   4    3.60   10.80
   9   2   4   15.60    6.50
   2 -11   4   35.80    9.90
 -11   9   4   21.70   10.10
 -11   9   4    7.60   13.10
  -9   1  -4  284.57   17.20
   8  -9  -4  299.47   18.20
   8  -9  -4  308.27   35.30
  -9   1  -4  271.37   14.00
  -9   1  -4  256.67   14.10
   8  -9  -4  227.78   30.10
   1   8  -4  267.07   13.20
  -9   1  -4  265.37   27.40
   8  -9  -4  262.97   19.80
   8  -9  -4  259.27   15.10
   1   8  -4  260.97   20.30
  -9   1  -4  268.97   17.70
  -9   1  -4  298.77   33.60
   1   8  -4  268.07   20.10
   1   8  -4  271.77   22.40
  -9   1  -4  265.47   15.70
   1   8  -4  245.48   20.40
   9  -1   4  272.27   19.60
  -1  -8   4  253.97   20.30
   9  -1   4  289.37   20.20
  -8   9   4  294.47   29.80
  -1  -8   4  288.57   19.80
   9  -1   4  318.87   34.30
  -1  -8   4  232.88   23.60
   9  -1   4  273.77   17.50
  -8   9   4  286.67   18.40
  -8   9   4  290.77   22.00
  -1  -8   4  262.27   20.60
   9  -1   4  268.67   19.70
  -8   9   4  250.07   30.90
   9  -1   4  276.87   17.60
  -8   9   4  296.67   19.80
  -1  -8   4  272.67   21.00
  -1  -8   4  284.27   20.50
  -8   9   4  295.97   21.00
  -8   9   4  267.87   18.60
  -1  -8   4  289.97   38.10
  -8   9   4  302.87   22.70
  -9   4  -4   -0.40    5.10
  -9   4  -4    7.20   15.10
   5  -9  -4   -2.00    6.50
   5  -9  -4    7.00   15.10
   5  -9  -4    4.50    5.00
   5  -9  -4    6.00    4.40
   4   5  -4   12.70    5.90
   4   5  -4    4.50    6.80
  -9   4  -4    8.00    4.50
   5  -9  -4   13.80    5.00
   4   5  -4   10.00    6.10
   4   5  -4    5.70    3.50
  -9   4  -4    4.20    4.30
  -9   4  -4    2.10    4.80
   4   5  -4   -1.00    7.20
   4   5  -4   -1.30    7.70
  -9   4  -4   30.50   10.70
   5  -9  -4    1.60    5.20
  -9   4  -4    9.10    4.10
   4   5  -4   -2.50   18.50
   5  -9  -4   -9.40   14.20
   5  -9  -4    8.40    4.90
  -4  -5   4    3.80    7.10
  -4  -5   4    6.80    5.90
  -4  -5   4   14.20    9.20
  -4  -5   4   10.10    5.50
   9  -4   4    7.50    6.50
  -5   9   4   -5.30    5.10
  -5   9   4   12.70   15.70
  -4  -5   4    4.90    5.40
   9  -4   4    4.80    8.20
   9  -4   4   14.10    7.90
  -5   9   4   13.20    7.20
  -5   9   4   -1.20    6.10
   9  -4   4    8.10    4.80
  -5   9   4   -2.70    6.40
  -5   9   4    6.30    6.00
  -5   9   4    3.70    4.50
   9  -4   4    6.70    5.00
   9  -4   4    9.70    7.60
  -5   9   4    8.70    7.30
  -4  -5   4   -0.90    5.70
   9  -4   4   10.00    4.80
  -4  -5   4   10.00   19.60
   7   2  -4  391.76   43.80
   2  -9  -4  322.67   29.50
  -9   7  -4  304.47   34.20
   2  -9  -4  367.76   21.00
   7   2  -4  352.66   22.10
  -9   7  -4  327.77   21.50
   2  -9  -4  368.76   34.10
  -9   7  -4  314.37   22.60
   2  -9  -4  346.87   19.60
  -9   7  -4  359.36   20.10
  -9   7  -4  310.17   20.80
   7   2  -4  317.17   23.00
   7   2  -4  322.87   24.20
   7   2  -4  326.57   20.20
   7   2  -4  348.87   21.80
   2  -9  -4  319.57   20.00
   7   2  -4  302.07   19.30
   2  -9  -4  400.66   32.70
   2  -9  -4  335.67   15.70
   2  -9  -4  336.57   16.50
   9  -7   4  357.76   21.40
  -7  -2   4  345.37   22.60
  -2   9   4  347.07   22.80
   9  -7   4  347.37   21.10
  -2   9   4  336.77   20.00
  -2   9   4  371.26   22.20
  -7  -2   4  345.07   22.40
   9  -7   4  350.06   21.10
  -7  -2   4  318.87   23.10
   9  -7   4  319.27   24.20
  -2   9   4  350.26   19.90
  -2   9   4  319.27   32.60
  -7  -2   4  332.07   21.60
  -2   9   4  321.97   20.20
   9  -7   4  342.07   22.30
  -7  -2   4  351.26   34.20
  -2   9   4  348.67   22.10
  -7  -2   4  291.37   18.00
   9  -7   4  341.67   21.40
  -7  -2   4  328.67   24.50
  -2   9   4  333.97   21.20
  -9  10  -4   19.60    9.70
  10  -1  -4   27.50   11.10
  -1  -9  -4   13.60    6.50
  -1  -9  -4    7.50   18.50
  -1  -9  -4   28.00    8.80
  10  -1  -4   38.20   26.10
  -1  -9  -4   25.90   16.90
  -9  10  -4    5.50    8.20
  -1  -9  -4   14.50    3.50
  -9  10  -4   17.30    7.90
  -9  10  -4   -3.90   17.50
  -9  10  -4    0.20    8.30
  10  -1  -4   14.30    5.30
  10  -1  -4   12.00    8.20
  10  -1  -4    9.60   11.80
  10  -1  -4   22.30    8.90
  -1  -9  -4    9.70    7.80
  -9  10  -4   23.10    9.00
  10  -1  -4   10.00    9.00
   9 -10   4   29.50   12.00
 -10   1   4   23.70    8.70
 -10   1   4   25.90   10.40
   9 -10   4   23.50    8.40
   9 -10   4   21.30    7.00
   1   9   4   25.20    7.70
 -10   1   4   13.90    9.00
 -10   1   4   40.90   18.90
   1   9   4   19.00    4.80
   1   9   4   15.10    8.60
   1   9   4   13.20    7.50
   1   9   4   12.70    7.20
   1   9   4   36.10    8.50
   9 -10   4   24.20   10.20
   1   9   4    6.80    9.50
   1   9   4   53.69   20.50
   9 -10   4   19.30    9.20
 -10   1   4   34.20   12.50
   9 -10   4   19.20    8.40
  -9  13  -4  191.88   24.70
  -9  13  -4  232.18   19.70
  13  -4  -4  223.18   21.20
  -9  13  -4  176.38   20.40
  -4  -9  -4  211.78   19.50
  -4  -9  -4  199.58   14.10
  -4  -9  -4  202.38   28.20
  13  -4  -4  217.58   25.80
  -9  13  -4  210.68   20.70
  13  -4  -4  250.37   30.40
[truncated: 213,560 more chars]
