# Supplementary material for: Orientation Relationship of the Intergrowth Al13Fe3 and Al13Fe4 Intermetallics Determined by Single-Crystal X-ray Diffraction
Source: MDPI journal article supplement (doi:10.3390/met14040463), 2024-04-15
Supplement: s1 [file s1 › Al13Fe4 crystallographic information.pdf]

**Abstract****Table 1**

## Experimental details

|                                                                               |                                                      |
|-------------------------------------------------------------------------------|------------------------------------------------------|
| Crystal data                                                                  |                                                      |
| Chemical formula                                                              | Al <sub>3.25</sub> Fe                                |
| $M_r$                                                                         | 143.53                                               |
| Crystal system, space group                                                   | Monoclinic, $C2/m$                                   |
| Temperature (K)                                                               | 300                                                  |
| $a, b, c$ (Å)                                                                 | 15.498 (4), 8.0814 (17), 12.488 (3)                  |
| $\beta$ (°)                                                                   | 107.790 (8)                                          |
| $V$ (Å <sup>3</sup> )                                                         | 1489.2 (6)                                           |
| $Z$                                                                           | 24                                                   |
| Radiation type                                                                | Mo $K\alpha$                                         |
| $\mu$ (mm <sup>-1</sup> )                                                     | 6.82                                                 |
| Crystal size (mm)                                                             | 0.10 × 0.06 × 0.06                                   |
| Data collection                                                               |                                                      |
| Diffractometer                                                                | Bruker D8 Venture Photon 100 CMOS                    |
| Absorption correction                                                         | Multi-scan<br>( <i>SADABS</i> ; Krause et al., 2015) |
| $T_{\min}, T_{\max}$                                                          | 0.552, 0.746                                         |
| No. of measured, independent and<br>observed [ $I > 2\sigma(I)$ ] reflections | 3922, 1423, 756                                      |
| $R_{\text{int}}$                                                              | 0.102                                                |
| $(\sin \theta/\lambda)_{\text{max}}$ (Å <sup>-1</sup> )                       | 0.650                                                |
| Refinement                                                                    |                                                      |
| $R[F^2 > 2\sigma(F^2)], wR(F^2), S$                                           | 0.080, 0.223, 1.06                                   |
| No. of reflections                                                            | 1423                                                 |
| No. of parameters                                                             | 128                                                  |
| No. of restraints                                                             | 104                                                  |
| $\Delta\rho_{\text{max}}, \Delta\rho_{\text{min}}$ (e Å <sup>-3</sup> )       | 1.71, -2.04                                          |

Computer programs: *SHELXL2019/1* (Sheldrick, 2019).

**References**

NOT FOUND

## full crystallographic data

## Computing details

Program(s) used to refine structure: *SHELXL2019/1* (Sheldrick, 2019).

## (Al13Fe4\_a)

## Crystal data

|                                |                                                         |
|--------------------------------|---------------------------------------------------------|
| Al <sub>13.25</sub> Fe         | $F(000) = 1638$                                         |
| $M_r = 143.53$                 | $D_x = 3.841 \text{ Mg m}^{-3}$                         |
| Monoclinic, $C2/m$             | Mo $K\alpha$ radiation, $\lambda = 0.71073 \text{ \AA}$ |
| $a = 15.498 (4) \text{ \AA}$   | Cell parameters from 3129 reflections                   |
| $b = 8.0814 (17) \text{ \AA}$  | $\theta = 3.1\text{--}27.5^\circ$                       |
| $c = 12.488 (3) \text{ \AA}$   | $\mu = 6.82 \text{ mm}^{-1}$                            |
| $\beta = 107.790 (8)^\circ$    | $T = 300 \text{ K}$                                     |
| $V = 1489.2 (6) \text{ \AA}^3$ | Lump, gray                                              |
| $Z = 24$                       | $0.10 \times 0.06 \times 0.06 \text{ mm}$               |

## Data collection

|                                                                             |                                                                        |
|-----------------------------------------------------------------------------|------------------------------------------------------------------------|
| Bruker D8 Venture Photon 100 CMOS<br>diffractometer                         | 1423 independent reflections                                           |
| phi and $\omega$ scans                                                      | 756 reflections with $I > 2\sigma(I)$                                  |
| Absorption correction: multi-scan<br>( <i>SADABS</i> ; Krause et al., 2015) | $R_{\text{int}} = 0.102$                                               |
| $T_{\text{min}} = 0.552$ , $T_{\text{max}} = 0.746$                         | $\theta_{\text{max}} = 27.5^\circ$ , $\theta_{\text{min}} = 2.8^\circ$ |
| 3922 measured reflections                                                   | $h = -18 \rightarrow 11$                                               |
|                                                                             | $k = -9 \rightarrow 9$                                                 |
|                                                                             | $l = -16 \rightarrow 13$                                               |

## Refinement

|                                 |                                                      |
|---------------------------------|------------------------------------------------------|
| Refinement on $F^2$             | 104 restraints                                       |
| Least-squares matrix: full      | $w = 1/[\sigma^2(F_o^2) + (0.0834P)^2]$              |
| $R[F^2 > 2\sigma(F^2)] = 0.080$ | where $P = (F_o^2 + 2F_c^2)/3$                       |
| $wR(F^2) = 0.223$               | $(\Delta/\sigma)_{\text{max}} < 0.001$               |
| $S = 1.06$                      | $\Delta\rho_{\text{max}} = 1.71 \text{ e \AA}^{-3}$  |
| 1423 reflections                | $\Delta\rho_{\text{min}} = -2.04 \text{ e \AA}^{-3}$ |
| 128 parameters                  |                                                      |

## Special details

*Geometry.* All esds (except the esd in the dihedral angle between two l.s. planes) are estimated using the full covariance matrix. The cell esds are taken into account individually in the estimation of esds in distances, angles and torsion angles; correlations between esds in cell parameters are only used when they are defined by crystal symmetry. An approximate (isotropic) treatment of cell esds is used for estimating esds involving l.s. planes.

Fractional atomic coordinates and isotropic or equivalent isotropic displacement parameters ( $\text{\AA}^2$ ) for (Al13Fe4\_a)

|     | <i>x</i>     | <i>y</i>   | <i>z</i>     | $U_{\text{iso}}^*/U_{\text{eq}}$ |
|-----|--------------|------------|--------------|----------------------------------|
| Fe1 | 0.0855 (3)   | 0.000000   | 0.3823 (3)   | 0.0043 (9)                       |
| Fe2 | 0.4019 (3)   | 0.000000   | 0.6228 (3)   | 0.0065 (9)                       |
| Fe3 | 0.0908 (3)   | 0.000000   | 0.9885 (3)   | 0.0056 (10)                      |
| Fe4 | 0.4028 (3)   | 0.000000   | 0.9863 (3)   | 0.0046 (9)                       |
| Fe5 | 0.32011 (18) | 0.2933 (3) | 0.27793 (19) | 0.0068 (7)                       |
| Al1 | 0.0670 (6)   | 0.000000   | 0.1738 (6)   | 0.0113 (18)                      |

|      |            |            |            |             |
|------|------------|------------|------------|-------------|
| Al2  | 0.3213 (6) | 0.000000   | 0.2812 (6) | 0.0112 (11) |
| Al3  | 0.2381 (6) | 0.000000   | 0.5339 (6) | 0.0112 (11) |
| Al4  | 0.0734 (6) | 0.000000   | 0.5801 (6) | 0.0111 (18) |
| Al5  | 0.2415 (6) | 0.000000   | 0.9614 (7) | 0.0104 (17) |
| Al6  | 0.4786 (6) | 0.000000   | 0.8297 (6) | 0.0112 (11) |
| Al7  | 0.500000   | 0.000000   | 0.500000   | 0.011 (2)   |
| Al8  | 0.3060 (6) | 0.000000   | 0.7729 (6) | 0.0109 (17) |
| Al9  | 0.0862 (6) | 0.000000   | 0.7888 (6) | 0.0098 (18) |
| Al10 | 0.1859 (4) | 0.2172 (7) | 0.1112 (4) | 0.0096 (14) |
| Al11 | 0.3673 (4) | 0.2116 (7) | 0.1101 (4) | 0.0103 (13) |
| Al12 | 0.1772 (4) | 0.2211 (7) | 0.3343 (4) | 0.0118 (13) |
| Al13 | 0.4920 (4) | 0.2328 (6) | 0.3296 (4) | 0.0082 (13) |
| Al14 | 0.3636 (4) | 0.2198 (7) | 0.4781 (4) | 0.0108 (13) |
| Al15 | 0.000000   | 0.2495 (9) | 0.000000   | 0.0086 (19) |

*Atomic displacement parameters ( $\text{\AA}^2$ ) for (Al13Fe4\_a)*

|      | $U^{11}$    | $U^{22}$    | $U^{33}$    | $U^{12}$     | $U^{13}$     | $U^{23}$     |
|------|-------------|-------------|-------------|--------------|--------------|--------------|
| Fe1  | 0.004 (2)   | 0.0021 (18) | 0.0064 (17) | 0.000        | 0.0011 (16)  | 0.000        |
| Fe2  | 0.008 (2)   | 0.0018 (18) | 0.0055 (17) | 0.000        | −0.0047 (16) | 0.000        |
| Fe3  | 0.006 (2)   | 0.0039 (18) | 0.0052 (17) | 0.000        | −0.0009 (16) | 0.000        |
| Fe4  | 0.005 (2)   | 0.0023 (18) | 0.0073 (17) | 0.000        | 0.0020 (16)  | 0.000        |
| Fe5  | 0.0063 (17) | 0.0076 (14) | 0.0046 (12) | −0.0001 (12) | −0.0012 (11) | −0.0001 (10) |
| Al1  | 0.014 (5)   | 0.014 (4)   | 0.004 (3)   | 0.000        | −0.001 (3)   | 0.000        |
| Al2  | 0.011 (3)   | 0.008 (2)   | 0.0100 (19) | 0.000        | −0.0040 (18) | 0.000        |
| Al3  | 0.011 (3)   | 0.008 (2)   | 0.0100 (19) | 0.000        | −0.0040 (18) | 0.000        |
| Al4  | 0.009 (4)   | 0.015 (4)   | 0.007 (3)   | 0.000        | 0.000 (3)    | 0.000        |
| Al5  | 0.006 (4)   | 0.004 (4)   | 0.017 (4)   | 0.000        | −0.004 (3)   | 0.000        |
| Al6  | 0.011 (3)   | 0.008 (2)   | 0.0100 (19) | 0.000        | −0.0040 (18) | 0.000        |
| Al7  | 0.016 (6)   | 0.011 (5)   | 0.003 (4)   | 0.000        | −0.002 (4)   | 0.000        |
| Al8  | 0.017 (4)   | 0.005 (4)   | 0.008 (3)   | 0.000        | 0.001 (3)    | 0.000        |
| Al9  | 0.011 (5)   | 0.008 (4)   | 0.007 (3)   | 0.000        | −0.002 (3)   | 0.000        |
| Al10 | 0.008 (3)   | 0.012 (3)   | 0.007 (3)   | 0.002 (2)    | −0.001 (2)   | −0.002 (2)   |
| Al11 | 0.007 (3)   | 0.012 (3)   | 0.008 (2)   | 0.001 (3)    | −0.003 (2)   | −0.003 (2)   |
| Al12 | 0.014 (3)   | 0.010 (3)   | 0.007 (3)   | −0.004 (2)   | −0.002 (2)   | −0.001 (2)   |
| Al13 | 0.011 (3)   | 0.009 (3)   | 0.004 (3)   | −0.002 (2)   | 0.002 (2)    | −0.001 (2)   |
| Al14 | 0.007 (3)   | 0.014 (3)   | 0.009 (2)   | 0.000 (2)    | −0.001 (2)   | 0.002 (2)    |
| Al15 | 0.010 (4)   | 0.003 (4)   | 0.006 (3)   | 0.000        | −0.006 (3)   | 0.000        |

*Bond lengths ( $\text{\AA}$ ) for (Al13Fe4\_a)*

|                         |            |                        |            |
|-------------------------|------------|------------------------|------------|
| Fe1—Al12 <sup>i</sup>   | 2.468 (6)  | Al2—Al11 <sup>i</sup>  | 2.989 (9)  |
| Fe1—Al12                | 2.468 (6)  | Al2—Al11               | 2.989 (9)  |
| Fe1—Al1                 | 2.530 (8)  | Al3—Al14 <sup>vi</sup> | 2.736 (8)  |
| Fe1—Al4                 | 2.534 (8)  | Al3—Al14 <sup>v</sup>  | 2.736 (8)  |
| Fe1—Al3                 | 2.538 (9)  | Al3—Al4                | 2.783 (14) |
| Fe1—Al13 <sup>ii</sup>  | 2.572 (6)  | Al3—Al8                | 2.845 (10) |
| Fe1—Al13 <sup>iii</sup> | 2.572 (6)  | Al3—Al12 <sup>v</sup>  | 2.862 (7)  |
| Fe1—Al4 <sup>iv</sup>   | 2.645 (10) | Al3—Al12 <sup>vi</sup> | 2.862 (7)  |
| Fe1—Al14 <sup>v</sup>   | 2.819 (6)  | Al3—Al14 <sup>i</sup>  | 2.872 (9)  |
| Fe1—Al14 <sup>vi</sup>  | 2.819 (6)  | Al3—Al14               | 2.872 (9)  |

|                          |            |                          |            |
|--------------------------|------------|--------------------------|------------|
| Fe1—Al9 <sup>iv</sup>    | 2.859 (8)  | Al3—Al12 <sup>i</sup>    | 2.977 (8)  |
| Fe2—Al3                  | 2.440 (9)  | Al3—Al12                 | 2.977 (8)  |
| Fe2—Al13 <sup>vii</sup>  | 2.449 (6)  | Al4—Al4 <sup>iv</sup>    | 2.530 (15) |
| Fe2—Al13 <sup>viii</sup> | 2.449 (6)  | Al4—Al9                  | 2.552 (11) |
| Fe2—Al7                  | 2.468 (4)  | Al4—Al14 <sup>v</sup>    | 2.654 (7)  |
| Fe2—Al14 <sup>i</sup>    | 2.473 (6)  | Al4—Al14 <sup>vi</sup>   | 2.654 (7)  |
| Fe2—Al14                 | 2.473 (6)  | Al4—Al13 <sup>v</sup>    | 2.768 (8)  |
| Fe2—Al6                  | 2.492 (8)  | Al4—Al13 <sup>vi</sup>   | 2.768 (8)  |
| Fe2—Al12 <sup>vi</sup>   | 2.697 (6)  | Al5—Al9                  | 2.695 (11) |
| Fe2—Al12 <sup>v</sup>    | 2.697 (6)  | Al5—Al10 <sup>v</sup>    | 2.817 (8)  |
| Fe2—Al8                  | 2.725 (10) | Al5—Al10 <sup>vi</sup>   | 2.817 (8)  |
| Fe3—Al1 <sup>ix</sup>    | 2.453 (9)  | Al5—Al11 <sup>ix</sup>   | 2.822 (8)  |
| Fe3—Al5                  | 2.459 (10) | Al5—Al11 <sup>x</sup>    | 2.822 (8)  |
| Fe3—Al9                  | 2.473 (8)  | Al5—Al8                  | 2.824 (12) |
| Fe3—Al15 <sup>iv</sup>   | 2.488 (6)  | Al5—Al11 <sup>vi</sup>   | 2.855 (7)  |
| Fe3—Al15 <sup>ix</sup>   | 2.488 (6)  | Al5—Al11 <sup>v</sup>    | 2.855 (7)  |
| Fe3—Al10 <sup>ix</sup>   | 2.494 (6)  | Al5—Al10 <sup>ix</sup>   | 2.883 (9)  |
| Fe3—Al10 <sup>x</sup>    | 2.494 (6)  | Al5—Al10 <sup>x</sup>    | 2.883 (9)  |
| Fe3—Al1 <sup>iv</sup>    | 2.657 (9)  | Al6—Al8                  | 2.550 (12) |
| Fe3—Al11 <sup>vi</sup>   | 2.803 (6)  | Al6—Al11 <sup>vii</sup>  | 2.845 (9)  |
| Fe3—Al11 <sup>v</sup>    | 2.803 (6)  | Al6—Al11 <sup>viii</sup> | 2.845 (9)  |
| Fe3—Fe3 <sup>xi</sup>    | 2.916 (8)  | Al6—Al13 <sup>viii</sup> | 2.873 (8)  |
| Fe4—Al5                  | 2.424 (10) | Al6—Al13 <sup>vii</sup>  | 2.873 (8)  |
| Fe4—Al6 <sup>xii</sup>   | 2.465 (8)  | Al6—Al15 <sup>v</sup>    | 2.881 (7)  |
| Fe4—Al11 <sup>ix</sup>   | 2.477 (6)  | Al6—Al15 <sup>xiii</sup> | 2.881 (7)  |
| Fe4—Al11 <sup>x</sup>    | 2.477 (6)  | Al7—Al14                 | 2.711 (6)  |
| Fe4—Al15 <sup>v</sup>    | 2.497 (6)  | Al7—Al14 <sup>i</sup>    | 2.711 (6)  |
| Fe4—Al15 <sup>xiii</sup> | 2.497 (6)  | Al7—Al14 <sup>vii</sup>  | 2.711 (6)  |
| Fe4—Al6                  | 2.571 (10) | Al7—Al14 <sup>viii</sup> | 2.711 (6)  |
| Fe4—Al8                  | 2.628 (8)  | Al7—Al13 <sup>vii</sup>  | 2.814 (5)  |
| Fe4—Al10 <sup>vi</sup>   | 2.752 (6)  | Al7—Al13 <sup>i</sup>    | 2.814 (5)  |
| Fe4—Al10 <sup>v</sup>    | 2.752 (6)  | Al7—Al13 <sup>viii</sup> | 2.814 (5)  |
| Fe4—Fe4 <sup>xii</sup>   | 2.926 (8)  | Al7—Al13                 | 2.814 (5)  |
| Fe5—Al2                  | 2.370 (2)  | Al8—Al12 <sup>vi</sup>   | 2.675 (7)  |
| Fe5—Al14                 | 2.455 (6)  | Al8—Al12 <sup>v</sup>    | 2.675 (7)  |
| Fe5—Al8 <sup>v</sup>     | 2.501 (7)  | Al8—Al10 <sup>v</sup>    | 2.687 (7)  |
| Fe5—Al11                 | 2.510 (6)  | Al8—Al10 <sup>vi</sup>   | 2.687 (7)  |
| Fe5—Al9 <sup>v</sup>     | 2.516 (7)  | Al9—Al11 <sup>v</sup>    | 2.644 (6)  |
| Fe5—Al10                 | 2.529 (6)  | Al9—Al11 <sup>vi</sup>   | 2.644 (6)  |
| Fe5—Al12                 | 2.586 (7)  | Al9—Al13 <sup>vi</sup>   | 2.688 (7)  |
| Fe5—Al13                 | 2.589 (6)  | Al9—Al13 <sup>v</sup>    | 2.688 (7)  |
| Fe5—Al4 <sup>v</sup>     | 2.621 (6)  | Al10—Al11 <sup>xv</sup>  | 2.694 (7)  |
| Al1—Al9 <sup>iv</sup>    | 2.556 (14) | Al10—Al15                | 2.802 (6)  |
| Al1—Al10 <sup>i</sup>    | 2.822 (9)  | Al10—Al11                | 2.817 (9)  |
| Al1—Al10                 | 2.822 (9)  | Al10—Al12                | 2.829 (8)  |
| Al1—Al12 <sup>i</sup>    | 2.834 (8)  | Al11—Al15 <sup>xv</sup>  | 2.819 (6)  |
| Al1—Al12                 | 2.834 (8)  | Al11—Al13                | 2.836 (7)  |
| Al1—Al15 <sup>xiv</sup>  | 2.912 (7)  | Al12—Al14 <sup>v</sup>   | 2.650 (8)  |
| Al1—Al15                 | 2.912 (7)  | Al12—Al13 <sup>iii</sup> | 2.878 (8)  |
| Al2—Al14                 | 2.941 (8)  | Al12—Al14                | 2.897 (8)  |
| Al2—Al14 <sup>i</sup>    | 2.941 (8)  | Al13—Al14 <sup>vii</sup> | 2.739 (7)  |

Symmetry codes: (i)  $x, -y, z$ ; (ii)  $x-1/2, y-1/2, z$ ; (iii)  $x-1/2, -y+1/2, z$ ; (iv)  $-x, -y, -z+1$ ; (v)  $-x+1/2, -y+1/2, -z+1$ ; (vi)  $-x+1/2, y-1/2, -z+1$ ; (vii)  $-x+1, y, -z+1$ ; (viii)  $-x+1, -y, -z+1$ ; (ix)  $x, y, z+1$ ; (x)  $x, -y, z+1$ ; (xi)  $-x, -y, -z+2$ ; (xii)  $-x+1, -y, -z+2$ ; (xiii)  $x+1/2, y-1/2, z+1$ ; (xiv)  $-x, -y, -z$ ; (xv)  $-x+1/2, -y+1/2, -z$ .
