# Supplementary material for: Orientation Relationship of the Intergrowth Al13Fe3 and Al13Fe4 Intermetallics Determined by Single-Crystal X-ray Diffraction
Source: MDPI journal article supplement (doi:10.3390/met14040463), 2024-04-15
Supplement: s1 [file s1 › Al13Fe4.cif]

data_Al13Fe4_a

_audit_update_record
;
2024-03-28 # Formatted by publCIF

;
_publcif_datablock.id '{db8cb23e-3a23-4c8e-812a-91270e5a6c8d}'

_publ_section_exptl_refinement
;
(type here to add)
;

_publ_section_exptl_prep
;
(type here to add)
;

_publ_manuscript_text
;
(type here to add)
;
 
_audit_creation_method            'SHELXL-2019/1'
_shelx_SHELXL_version_number      '2019/1'
_chemical_name_systematic         ?
_chemical_name_common             ?
_chemical_melting_point           ?
_chemical_formula_moiety          ?
_chemical_formula_sum
 'Al3.25 Fe' 
_chemical_formula_weight          143.53

loop_
 _atom_type_symbol
 _atom_type_description
 _atom_type_scat_dispersion_real
 _atom_type_scat_dispersion_imag
 _atom_type_scat_source
 'Al'  'Al'   0.0645   0.0514
 'International Tables Vol C Tables 4.2.6.8 and 6.1.1.4'
 'Fe'  'Fe'   0.3463   0.8444
 'International Tables Vol C Tables 4.2.6.8 and 6.1.1.4'
 
_space_group_crystal_system       monoclinic
_space_group_IT_number            12
_space_group_name_H-M_alt         'C 2/m'
_space_group_name_Hall            '-C 2y'
 
_shelx_space_group_comment
;
The symmetry employed for this shelxl refinement is uniquely defined
by the following loop, which should always be used as a source of
symmetry information in preference to the above space-group names.
They are only intended as comments.
;
 
loop_
 _space_group_symop_operation_xyz
 'x, y, z'
 '-x, y, -z'
 'x+1/2, y+1/2, z'
 '-x+1/2, y+1/2, -z'
 '-x, -y, -z'
 'x, -y, z'
 '-x+1/2, -y+1/2, -z'
 'x+1/2, -y+1/2, z'
 
_cell_length_a                    15.498(4)
_cell_length_b                    8.0814(17)
_cell_length_c                    12.488(3)
_cell_angle_alpha                 90
_cell_angle_beta                  107.790(8)
_cell_angle_gamma                 90
_cell_volume                      1489.2(6)
_cell_formula_units_Z             24
_cell_measurement_temperature     300(2)
_cell_measurement_reflns_used     3129
_cell_measurement_theta_min       3.12
_cell_measurement_theta_max       27.49
 
_exptl_crystal_description        lump
_exptl_crystal_colour             gray
_exptl_crystal_density_meas       ?
_exptl_crystal_density_method     ?
_exptl_crystal_density_diffrn     3.841          
_exptl_crystal_F_000              1638
_exptl_transmission_factor_min    ?
_exptl_transmission_factor_max    ?
_exptl_crystal_size_max           0.10
_exptl_crystal_size_mid           0.06
_exptl_crystal_size_min           0.06
_exptl_absorpt_coefficient_mu     6.824
_shelx_estimated_absorpt_T_min    ?
_shelx_estimated_absorpt_T_max    ?
_exptl_absorpt_correction_type    multi-scan
_exptl_absorpt_correction_T_min   0.5520
_exptl_absorpt_correction_T_max   0.7456
_exptl_absorpt_process_details    '(SADABS; Krause et al., 2015)'
_diffrn_ambient_temperature       300(2)
_diffrn_radiation_wavelength      0.71073
_diffrn_radiation_type            MoK\a
_diffrn_source                    ?
_diffrn_measurement_device_type   'Bruker D8 Venture Photon 100 CMOS'
_diffrn_measurement_method        'phi and omega scans'
_diffrn_detector_area_resol_mean  ?
_diffrn_reflns_number             3922
_diffrn_reflns_av_unetI/netI      0.1776
_diffrn_reflns_av_R_equivalents   0.1019
_diffrn_reflns_limit_h_min        -18
_diffrn_reflns_limit_h_max        11
_diffrn_reflns_limit_k_min        -9
_diffrn_reflns_limit_k_max        9
_diffrn_reflns_limit_l_min        -16
_diffrn_reflns_limit_l_max        13
_diffrn_reflns_theta_min          2.761
_diffrn_reflns_theta_max          27.536
_diffrn_reflns_theta_full         25.242
_diffrn_measured_fraction_theta_max   0.770
_diffrn_measured_fraction_theta_full  0.820
_diffrn_reflns_Laue_measured_fraction_max    0.770
_diffrn_reflns_Laue_measured_fraction_full   0.820
_diffrn_reflns_point_group_measured_fraction_max   0.770
_diffrn_reflns_point_group_measured_fraction_full  0.820
_reflns_number_total              1423
_reflns_number_gt                 756
_reflns_threshold_expression      'I > 2\s(I)'
_reflns_Friedel_coverage          0.000
_reflns_Friedel_fraction_max      .
_reflns_Friedel_fraction_full     .
 
_reflns_special_details
;
 Reflections were merged by SHELXL according to the crystal
 class for the calculation of statistics and refinement.
 
 _reflns_Friedel_fraction is defined as the number of unique
 Friedel pairs measured divided by the number that would be
 possible theoretically, ignoring centric projections and
 systematic absences.
;
 
_computing_data_collection        ?
_computing_cell_refinement        ?
_computing_data_reduction         ?
_computing_structure_solution     ?
_computing_structure_refinement 'SHELXL-2019/1 (Sheldrick, 2019)'
_computing_molecular_graphics     ?
_computing_publication_material   ?
_refine_special_details           ?
_refine_ls_structure_factor_coef  Fsqd
_refine_ls_matrix_type            full
_refine_ls_weighting_scheme       calc
_refine_ls_weighting_details
'w=1/[\s^2^(Fo^2^)+(0.0834P)^2^] where P=(Fo^2^+2Fc^2^)/3'
_atom_sites_solution_primary      ?
_atom_sites_solution_secondary    ?
_atom_sites_solution_hydrogens    .
_refine_ls_hydrogen_treatment     undef
_refine_ls_extinction_method      none
_refine_ls_extinction_coef        .
_refine_ls_number_reflns          1423
_refine_ls_number_parameters      128
_refine_ls_number_restraints      104
_refine_ls_R_factor_all           0.1721
_refine_ls_R_factor_gt            0.0803
_refine_ls_wR_factor_ref          0.2230
_refine_ls_wR_factor_gt           0.1727
_refine_ls_goodness_of_fit_ref    1.064
_refine_ls_restrained_S_all       1.030
_refine_ls_shift/su_max           0.000
_refine_ls_shift/su_mean          0.000
 
loop_
 _atom_site_label
 _atom_site_type_symbol
 _atom_site_fract_x
 _atom_site_fract_y
 _atom_site_fract_z
 _atom_site_U_iso_or_equiv
 _atom_site_adp_type
 _atom_site_occupancy
 _atom_site_site_symmetry_order  
 _atom_site_calc_flag
 _atom_site_refinement_flags_posn
 _atom_site_refinement_flags_adp
 _atom_site_refinement_flags_occupancy
 _atom_site_disorder_assembly
 _atom_site_disorder_group
Fe1 Fe 0.0855(3) 0.000000 0.3823(3) 0.0043(9) Uani 1 2 d S TU P . .
Fe2 Fe 0.4019(3) 0.000000 0.6228(3) 0.0065(9) Uani 1 2 d S TU P . .
Fe3 Fe 0.0908(3) 0.000000 0.9885(3) 0.0056(10) Uani 1 2 d S TU P . .
Fe4 Fe 0.4028(3) 0.000000 0.9863(3) 0.0046(9) Uani 1 2 d S TU P . .
Fe5 Fe 0.32011(18) 0.2933(3) 0.27793(19) 0.0068(7) Uani 1 1 d . U . . .
Al1 Al 0.0670(6) 0.000000 0.1738(6) 0.0113(18) Uani 1 2 d S TU P . .
Al2 Al 0.3213(6) 0.000000 0.2812(6) 0.0112(11) Uani 1 2 d S TU P . .
Al3 Al 0.2381(6) 0.000000 0.5339(6) 0.0112(11) Uani 1 2 d S TU P . .
Al4 Al 0.0734(6) 0.000000 0.5801(6) 0.0111(18) Uani 1 2 d S TU P . .
Al5 Al 0.2415(6) 0.000000 0.9614(7) 0.0104(17) Uani 1 2 d S TU P . .
Al6 Al 0.4786(6) 0.000000 0.8297(6) 0.0112(11) Uani 1 2 d S TU P . .
Al7 Al 0.500000 0.000000 0.500000 0.011(2) Uani 1 4 d S TU P . .
Al8 Al 0.3060(6) 0.000000 0.7729(6) 0.0109(17) Uani 1 2 d S TU P . .
Al9 Al 0.0862(6) 0.000000 0.7888(6) 0.0098(18) Uani 1 2 d S TU P . .
Al10 Al 0.1859(4) 0.2172(7) 0.1112(4) 0.0096(14) Uani 1 1 d . U . . .
Al11 Al 0.3673(4) 0.2116(7) 0.1101(4) 0.0103(13) Uani 1 1 d . U . . .
Al12 Al 0.1772(4) 0.2211(7) 0.3343(4) 0.0118(13) Uani 1 1 d . U . . .
Al13 Al 0.4920(4) 0.2328(6) 0.3296(4) 0.0082(13) Uani 1 1 d . U . . .
Al14 Al 0.3636(4) 0.2198(7) 0.4781(4) 0.0108(13) Uani 1 1 d . U . . .
Al15 Al 0.000000 0.2495(9) 0.000000 0.0086(19) Uani 1 2 d S TU P . .
 
loop_
 _atom_site_aniso_label
 _atom_site_aniso_U_11
 _atom_site_aniso_U_22
 _atom_site_aniso_U_33
 _atom_site_aniso_U_23
 _atom_site_aniso_U_13
 _atom_site_aniso_U_12
Fe1 0.004(2) 0.0021(18) 0.0064(17) 0.000 0.0011(16) 0.000
Fe2 0.008(2) 0.0018(18) 0.0055(17) 0.000 -0.0047(16) 0.000
Fe3 0.006(2) 0.0039(18) 0.0052(17) 0.000 -0.0009(16) 0.000
Fe4 0.005(2) 0.0023(18) 0.0073(17) 0.000 0.0020(16) 0.000
Fe5 0.0063(17) 0.0076(14) 0.0046(12) -0.0001(10) -0.0012(11) -0.0001(12)
Al1 0.014(5) 0.014(4) 0.004(3) 0.000 -0.001(3) 0.000
Al2 0.011(3) 0.008(2) 0.0100(19) 0.000 -0.0040(18) 0.000
Al3 0.011(3) 0.008(2) 0.0100(19) 0.000 -0.0040(18) 0.000
Al4 0.009(4) 0.015(4) 0.007(3) 0.000 0.000(3) 0.000
Al5 0.006(4) 0.004(4) 0.017(4) 0.000 -0.004(3) 0.000
Al6 0.011(3) 0.008(2) 0.0100(19) 0.000 -0.0040(18) 0.000
Al7 0.016(6) 0.011(5) 0.003(4) 0.000 -0.002(4) 0.000
Al8 0.017(4) 0.005(4) 0.008(3) 0.000 0.001(3) 0.000
Al9 0.011(5) 0.008(4) 0.007(3) 0.000 -0.002(3) 0.000
Al10 0.008(3) 0.012(3) 0.007(3) -0.002(2) -0.001(2) 0.002(2)
Al11 0.007(3) 0.012(3) 0.008(2) -0.003(2) -0.003(2) 0.001(3)
Al12 0.014(3) 0.010(3) 0.007(3) -0.001(2) -0.002(2) -0.004(2)
Al13 0.011(3) 0.009(3) 0.004(3) -0.001(2) 0.002(2) -0.002(2)
Al14 0.007(3) 0.014(3) 0.009(2) 0.002(2) -0.001(2) 0.000(2)
Al15 0.010(4) 0.003(4) 0.006(3) 0.000 -0.006(3) 0.000
 
_geom_special_details
;
 All esds (except the esd in the dihedral angle between two l.s. planes)
 are estimated using the full covariance matrix.  The cell esds are taken
 into account individually in the estimation of esds in distances, angles
 and torsion angles; correlations between esds in cell parameters are only
 used when they are defined by crystal symmetry.  An approximate (isotropic)
 treatment of cell esds is used for estimating esds involving l.s. planes.
;
 
loop_
 _geom_bond_atom_site_label_1
 _geom_bond_atom_site_label_2
 _geom_bond_distance
 _geom_bond_site_symmetry_2
 _geom_bond_publ_flag
Fe1 Al12 2.468(6) 6 ?
Fe1 Al12 2.468(6) . ?
Fe1 Al1 2.530(8) . ?
Fe1 Al4 2.534(8) . ?
Fe1 Al3 2.538(9) . ?
Fe1 Al13 2.572(6) 3_445 ?
Fe1 Al13 2.572(6) 8_455 ?
Fe1 Al4 2.645(10) 5_556 ?
Fe1 Al14 2.819(6) 7_556 ?
Fe1 Al14 2.819(6) 4_546 ?
Fe1 Al9 2.859(8) 5_556 ?
Fe2 Al3 2.440(9) . ?
Fe2 Al13 2.449(6) 2_656 ?
Fe2 Al13 2.449(6) 5_656 ?
Fe2 Al7 2.468(4) . ?
Fe2 Al14 2.473(6) 6 ?
Fe2 Al14 2.473(6) . ?
Fe2 Al6 2.492(8) . ?
Fe2 Al12 2.697(6) 4_546 ?
Fe2 Al12 2.697(6) 7_556 ?
Fe2 Al8 2.725(10) . ?
Fe3 Al1 2.453(9) 1_556 ?
Fe3 Al5 2.459(10) . ?
Fe3 Al9 2.473(8) . ?
Fe3 Al15 2.488(6) 5_556 ?
Fe3 Al15 2.488(6) 1_556 ?
Fe3 Al10 2.494(6) 1_556 ?
Fe3 Al10 2.494(6) 6_556 ?
Fe3 Al1 2.657(9) 5_556 ?
Fe3 Al11 2.803(6) 4_546 ?
Fe3 Al11 2.803(6) 7_556 ?
Fe3 Fe3 2.916(8) 5_557 ?
Fe4 Al5 2.424(10) . ?
Fe4 Al6 2.465(8) 5_657 ?
Fe4 Al11 2.477(6) 1_556 ?
Fe4 Al11 2.477(6) 6_556 ?
Fe4 Al15 2.497(6) 7_556 ?
Fe4 Al15 2.497(6) 3_546 ?
Fe4 Al6 2.571(10) . ?
Fe4 Al8 2.628(8) . ?
Fe4 Al10 2.752(6) 4_546 ?
Fe4 Al10 2.752(6) 7_556 ?
Fe4 Fe4 2.926(8) 5_657 ?
Fe5 Al2 2.370(2) . ?
Fe5 Al14 2.455(6) . ?
Fe5 Al8 2.501(7) 7_556 ?
Fe5 Al11 2.510(6) . ?
Fe5 Al9 2.516(7) 7_556 ?
Fe5 Al10 2.529(6) . ?
Fe5 Al12 2.586(7) . ?
Fe5 Al13 2.589(6) . ?
Fe5 Al4 2.621(6) 7_556 ?
Al1 Al9 2.556(14) 5_556 ?
Al1 Al10 2.822(9) 6 ?
Al1 Al10 2.822(9) . ?
Al1 Al12 2.834(8) 6 ?
Al1 Al12 2.834(8) . ?
Al1 Al15 2.912(7) 5 ?
Al1 Al15 2.912(7) . ?
Al2 Al14 2.941(8) . ?
Al2 Al14 2.941(8) 6 ?
Al2 Al11 2.989(9) 6 ?
Al2 Al11 2.989(9) . ?
Al3 Al14 2.736(8) 4_546 ?
Al3 Al14 2.736(8) 7_556 ?
Al3 Al4 2.783(14) . ?
Al3 Al8 2.845(10) . ?
Al3 Al12 2.862(7) 7_556 ?
Al3 Al12 2.862(7) 4_546 ?
Al3 Al14 2.872(9) 6 ?
Al3 Al14 2.872(9) . ?
Al3 Al12 2.977(8) 6 ?
Al3 Al12 2.977(8) . ?
Al4 Al4 2.530(15) 5_556 ?
Al4 Al9 2.552(11) . ?
Al4 Al14 2.654(7) 7_556 ?
Al4 Al14 2.654(7) 4_546 ?
Al4 Al13 2.768(8) 7_556 ?
Al4 Al13 2.768(8) 4_546 ?
Al5 Al9 2.695(11) . ?
Al5 Al10 2.817(8) 7_556 ?
Al5 Al10 2.817(8) 4_546 ?
Al5 Al11 2.822(8) 1_556 ?
Al5 Al11 2.822(8) 6_556 ?
Al5 Al8 2.824(12) . ?
Al5 Al11 2.855(7) 4_546 ?
Al5 Al11 2.855(7) 7_556 ?
Al5 Al10 2.883(9) 1_556 ?
Al5 Al10 2.883(9) 6_556 ?
Al6 Al8 2.550(12) . ?
Al6 Al11 2.845(9) 2_656 ?
Al6 Al11 2.845(9) 5_656 ?
Al6 Al13 2.873(8) 5_656 ?
Al6 Al13 2.873(8) 2_656 ?
Al6 Al15 2.881(7) 7_556 ?
Al6 Al15 2.881(7) 3_546 ?
Al7 Al14 2.711(6) . ?
Al7 Al14 2.711(6) 6 ?
Al7 Al14 2.711(6) 2_656 ?
Al7 Al14 2.711(6) 5_656 ?
Al7 Al13 2.814(5) 2_656 ?
Al7 Al13 2.814(5) 6 ?
Al7 Al13 2.814(5) 5_656 ?
Al7 Al13 2.814(5) . ?
Al8 Al12 2.675(7) 4_546 ?
Al8 Al12 2.675(7) 7_556 ?
Al8 Al10 2.687(7) 7_556 ?
Al8 Al10 2.687(7) 4_546 ?
Al9 Al11 2.644(6) 7_556 ?
Al9 Al11 2.644(6) 4_546 ?
Al9 Al13 2.688(7) 4_546 ?
Al9 Al13 2.688(7) 7_556 ?
Al10 Al11 2.694(7) 7 ?
Al10 Al15 2.802(6) . ?
Al10 Al11 2.817(9) . ?
Al10 Al12 2.829(8) . ?
Al11 Al15 2.819(6) 7 ?
Al11 Al13 2.836(7) . ?
Al12 Al14 2.650(8) 7_556 ?
Al12 Al13 2.878(8) 8_455 ?
Al12 Al14 2.897(8) . ?
Al13 Al14 2.739(7) 2_656 ?
 
loop_
 _geom_angle_atom_site_label_1
 _geom_angle_atom_site_label_2
 _geom_angle_atom_site_label_3
 _geom_angle
 _geom_angle_site_symmetry_1
 _geom_angle_site_symmetry_3
 _geom_angle_publ_flag
Al12 Fe1 Al12 92.8(3) 6 . ?
Al12 Fe1 Al1 69.1(2) 6 . ?
Al12 Fe1 Al1 69.1(2) . . ?
Al12 Fe1 Al4 117.16(19) 6 . ?
Al12 Fe1 Al4 117.16(19) . . ?
Al1 Fe1 Al4 169.8(3) . . ?
Al12 Fe1 Al3 73.0(2) 6 . ?
Al12 Fe1 Al3 73.0(2) . . ?
Al1 Fe1 Al3 123.7(3) . . ?
Al4 Fe1 Al3 66.6(3) . . ?
Al12 Fe1 Al13 69.60(19) 6 3_445 ?
Al12 Fe1 Al13 150.1(2) . 3_445 ?
Al1 Fe1 Al13 81.89(17) . 3_445 ?
Al4 Fe1 Al13 92.61(18) . 3_445 ?
Al3 Fe1 Al13 120.97(14) . 3_445 ?
Al12 Fe1 Al13 150.1(2) 6 8_455 ?
Al12 Fe1 Al13 69.60(19) . 8_455 ?
Al1 Fe1 Al13 81.89(17) . 8_455 ?
Al4 Fe1 Al13 92.61(18) . 8_455 ?
Al3 Fe1 Al13 120.97(14) . 8_455 ?
Al13 Fe1 Al13 114.2(3) 3_445 8_455 ?
Al12 Fe1 Al4 132.82(16) 6 5_556 ?
Al12 Fe1 Al4 132.82(16) . 5_556 ?
Al1 Fe1 Al4 111.3(3) . 5_556 ?
Al4 Fe1 Al4 58.4(3) . 5_556 ?
Al3 Fe1 Al4 125.0(3) . 5_556 ?
Al13 Fe1 Al4 64.07(16) 3_445 5_556 ?
Al13 Fe1 Al4 64.07(16) 8_455 5_556 ?
Al12 Fe1 Al14 131.2(2) 6 7_556 ?
Al12 Fe1 Al14 59.71(18) . 7_556 ?
Al1 Fe1 Al14 123.95(15) . 7_556 ?
Al4 Fe1 Al14 59.16(15) . 7_556 ?
Al3 Fe1 Al14 61.16(15) . 7_556 ?
Al13 Fe1 Al14 149.5(2) 3_445 7_556 ?
Al13 Fe1 Al14 60.86(16) 8_455 7_556 ?
Al4 Fe1 Al14 89.44(19) 5_556 7_556 ?
Al12 Fe1 Al14 59.71(18) 6 4_546 ?
Al12 Fe1 Al14 131.2(2) . 4_546 ?
Al1 Fe1 Al14 123.95(15) . 4_546 ?
Al4 Fe1 Al14 59.16(15) . 4_546 ?
Al3 Fe1 Al14 61.16(15) . 4_546 ?
Al13 Fe1 Al14 60.86(16) 3_445 4_546 ?
Al13 Fe1 Al14 149.5(2) 8_455 4_546 ?
Al4 Fe1 Al14 89.44(19) 5_556 4_546 ?
Al14 Fe1 Al14 106.9(2) 7_556 4_546 ?
Al12 Fe1 Al9 107.00(18) 6 5_556 ?
Al12 Fe1 Al9 107.00(18) . 5_556 ?
Al1 Fe1 Al9 56.2(3) . 5_556 ?
Al4 Fe1 Al9 113.5(3) . 5_556 ?
Al3 Fe1 Al9 179.9(3) . 5_556 ?
Al13 Fe1 Al9 59.04(14) 3_445 5_556 ?
Al13 Fe1 Al9 59.04(14) 8_455 5_556 ?
Al4 Fe1 Al9 55.1(2) 5_556 5_556 ?
Al14 Fe1 Al9 118.87(16) 7_556 5_556 ?
Al14 Fe1 Al9 118.87(16) 4_546 5_556 ?
Al3 Fe2 Al13 129.67(14) . 2_656 ?
Al3 Fe2 Al13 129.67(14) . 5_656 ?
Al13 Fe2 Al13 100.4(3) 2_656 5_656 ?
Al3 Fe2 Al7 118.0(2) . . ?
Al13 Fe2 Al7 69.83(16) 2_656 . ?
Al13 Fe2 Al7 69.83(16) 5_656 . ?
Al3 Fe2 Al14 71.5(2) . 6 ?
Al13 Fe2 Al14 136.3(3) 2_656 6 ?
Al13 Fe2 Al14 67.62(18) 5_656 6 ?
Al7 Fe2 Al14 66.55(17) . 6 ?
Al3 Fe2 Al14 71.5(2) . . ?
Al13 Fe2 Al14 67.62(18) 2_656 . ?
Al13 Fe2 Al14 136.3(3) 5_656 . ?
Al7 Fe2 Al14 66.55(17) . . ?
Al14 Fe2 Al14 91.8(3) 6 . ?
Al3 Fe2 Al6 124.9(3) . . ?
Al13 Fe2 Al6 71.11(18) 2_656 . ?
Al13 Fe2 Al6 71.11(18) 5_656 . ?
Al7 Fe2 Al6 117.1(3) . . ?
Al14 Fe2 Al6 133.58(14) 6 . ?
Al14 Fe2 Al6 133.58(14) . . ?
Al3 Fe2 Al12 67.50(16) . 4_546 ?
Al13 Fe2 Al12 155.0(2) 2_656 4_546 ?
Al13 Fe2 Al12 67.80(18) 5_656 4_546 ?
Al7 Fe2 Al12 121.83(15) . 4_546 ?
Al14 Fe2 Al12 61.48(18) 6 4_546 ?
Al14 Fe2 Al12 136.3(2) . 4_546 ?
Al6 Fe2 Al12 84.03(18) . 4_546 ?
Al3 Fe2 Al12 67.50(16) . 7_556 ?
Al13 Fe2 Al12 67.80(18) 2_656 7_556 ?
Al13 Fe2 Al12 155.0(2) 5_656 7_556 ?
Al7 Fe2 Al12 121.83(15) . 7_556 ?
Al14 Fe2 Al12 136.3(2) 6 7_556 ?
Al14 Fe2 Al12 61.48(18) . 7_556 ?
Al6 Fe2 Al12 84.03(18) . 7_556 ?
Al12 Fe2 Al12 113.4(3) 4_546 7_556 ?
Al3 Fe2 Al8 66.6(3) . . ?
Al13 Fe2 Al8 107.46(18) 2_656 . ?
Al13 Fe2 Al8 107.46(18) 5_656 . ?
Al7 Fe2 Al8 175.4(2) . . ?
Al14 Fe2 Al8 116.3(2) 6 . ?
Al14 Fe2 Al8 116.3(2) . . ?
Al6 Fe2 Al8 58.3(3) . . ?
Al12 Fe2 Al8 59.11(15) 4_546 . ?
Al12 Fe2 Al8 59.11(15) 7_556 . ?
Al1 Fe3 Al5 123.6(3) 1_556 . ?
Al1 Fe3 Al9 170.2(3) 1_556 . ?
Al5 Fe3 Al9 66.2(3) . . ?
Al1 Fe3 Al15 72.21(14) 1_556 5_556 ?
Al5 Fe3 Al15 125.83(13) . 5_556 ?
Al9 Fe3 Al15 102.47(15) . 5_556 ?
Al1 Fe3 Al15 72.21(14) 1_556 1_556 ?
Al5 Fe3 Al15 125.83(13) . 1_556 ?
Al9 Fe3 Al15 102.47(15) . 1_556 ?
Al15 Fe3 Al15 108.3(3) 5_556 1_556 ?
Al1 Fe3 Al10 69.6(2) 1_556 1_556 ?
Al5 Fe3 Al10 71.2(2) . 1_556 ?
Al9 Fe3 Al10 116.7(2) . 1_556 ?
Al15 Fe3 Al10 140.6(2) 5_556 1_556 ?
Al15 Fe3 Al10 68.43(16) 1_556 1_556 ?
Al1 Fe3 Al10 69.6(2) 1_556 6_556 ?
Al5 Fe3 Al10 71.2(2) . 6_556 ?
Al9 Fe3 Al10 116.7(2) . 6_556 ?
Al15 Fe3 Al10 68.43(16) 5_556 6_556 ?
Al15 Fe3 Al10 140.6(2) 1_556 6_556 ?
Al10 Fe3 Al10 89.4(3) 1_556 6_556 ?
Al1 Fe3 Al1 110.6(2) 1_556 5_556 ?
Al5 Fe3 Al1 125.9(3) . 5_556 ?
Al9 Fe3 Al1 59.7(3) . 5_556 ?
Al15 Fe3 Al1 68.85(14) 5_556 5_556 ?
Al15 Fe3 Al1 68.85(14) 1_556 5_556 ?
Al10 Fe3 Al1 134.59(15) 1_556 5_556 ?
Al10 Fe3 Al1 134.59(15) 6_556 5_556 ?
Al1 Fe3 Al11 122.42(13) 1_556 4_546 ?
Al5 Fe3 Al11 65.33(16) . 4_546 ?
Al9 Fe3 Al11 59.76(13) . 4_546 ?
Al15 Fe3 Al11 64.06(15) 5_556 4_546 ?
Al15 Fe3 Al11 155.54(19) 1_556 4_546 ?
Al10 Fe3 Al11 133.0(3) 1_556 4_546 ?
Al10 Fe3 Al11 60.81(17) 6_556 4_546 ?
Al1 Fe3 Al11 87.01(18) 5_556 4_546 ?
Al1 Fe3 Al11 122.42(13) 1_556 7_556 ?
Al5 Fe3 Al11 65.33(16) . 7_556 ?
Al9 Fe3 Al11 59.76(13) . 7_556 ?
Al15 Fe3 Al11 155.54(19) 5_556 7_556 ?
Al15 Fe3 Al11 64.06(15) 1_556 7_556 ?
Al10 Fe3 Al11 60.81(17) 1_556 7_556 ?
Al10 Fe3 Al11 133.0(3) 6_556 7_556 ?
Al1 Fe3 Al11 87.01(18) 5_556 7_556 ?
Al11 Fe3 Al11 112.5(3) 4_546 7_556 ?
Al1 Fe3 Fe3 58.6(2) 1_556 5_557 ?
Al5 Fe3 Fe3 177.9(3) . 5_557 ?
Al9 Fe3 Fe3 111.6(3) . 5_557 ?
Al15 Fe3 Fe3 54.14(13) 5_556 5_557 ?
Al15 Fe3 Fe3 54.14(13) 1_556 5_557 ?
Al10 Fe3 Fe3 110.2(2) 1_556 5_557 ?
Al10 Fe3 Fe3 110.2(2) 6_556 5_557 ?
Al1 Fe3 Fe3 52.0(2) 5_556 5_557 ?
Al11 Fe3 Fe3 113.80(17) 4_546 5_557 ?
Al11 Fe3 Fe3 113.80(16) 7_556 5_557 ?
Al5 Fe4 Al6 124.4(3) . 5_657 ?
Al5 Fe4 Al11 70.3(2) . 1_556 ?
Al6 Fe4 Al11 70.3(2) 5_657 1_556 ?
Al5 Fe4 Al11 70.3(2) . 6_556 ?
Al6 Fe4 Al11 70.3(2) 5_657 6_556 ?
Al11 Fe4 Al11 87.3(3) 1_556 6_556 ?
Al5 Fe4 Al15 125.85(12) . 7_556 ?
Al6 Fe4 Al15 70.97(14) 5_657 7_556 ?
Al11 Fe4 Al15 69.02(16) 1_556 7_556 ?
Al11 Fe4 Al15 139.55(19) 6_556 7_556 ?
Al5 Fe4 Al15 125.85(12) . 3_546 ?
Al6 Fe4 Al15 70.97(14) 5_657 3_546 ?
Al11 Fe4 Al15 139.55(19) 1_556 3_546 ?
Al11 Fe4 Al15 69.02(16) 6_556 3_546 ?
Al15 Fe4 Al15 108.3(2) 7_556 3_546 ?
Al5 Fe4 Al6 126.5(3) . . ?
Al6 Fe4 Al6 109.0(2) 5_657 . ?
Al11 Fe4 Al6 135.65(16) 1_556 . ?
Al11 Fe4 Al6 135.65(16) 6_556 . ?
Al15 Fe4 Al6 69.27(14) 7_556 . ?
Al15 Fe4 Al6 69.27(14) 3_546 . ?
Al5 Fe4 Al8 67.8(3) . . ?
Al6 Fe4 Al8 167.7(3) 5_657 . ?
Al11 Fe4 Al8 117.8(2) 1_556 . ?
Al11 Fe4 Al8 117.8(2) 6_556 . ?
Al15 Fe4 Al8 102.42(15) 7_556 . ?
Al15 Fe4 Al8 102.42(15) 3_546 . ?
Al6 Fe4 Al8 58.7(3) . . ?
Al5 Fe4 Al10 65.61(17) . 4_546 ?
Al6 Fe4 Al10 122.80(13) 5_657 4_546 ?
Al11 Fe4 Al10 132.3(2) 1_556 4_546 ?
Al11 Fe4 Al10 61.75(17) 6_556 4_546 ?
Al15 Fe4 Al10 155.9(2) 7_556 4_546 ?
Al15 Fe4 Al10 64.30(15) 3_546 4_546 ?
Al6 Fe4 Al10 86.89(18) . 4_546 ?
Al8 Fe4 Al10 59.88(14) . 4_546 ?
Al5 Fe4 Al10 65.61(17) . 7_556 ?
Al6 Fe4 Al10 122.80(13) 5_657 7_556 ?
Al11 Fe4 Al10 61.75(17) 1_556 7_556 ?
Al11 Fe4 Al10 132.3(2) 6_556 7_556 ?
Al15 Fe4 Al10 64.30(15) 7_556 7_556 ?
Al15 Fe4 Al10 155.9(2) 3_546 7_556 ?
Al6 Fe4 Al10 86.89(18) . 7_556 ?
Al8 Fe4 Al10 59.88(13) . 7_556 ?
Al10 Fe4 Al10 112.3(2) 4_546 7_556 ?
Al5 Fe4 Fe4 179.4(3) . 5_657 ?
Al6 Fe4 Fe4 56.2(2) 5_657 5_657 ?
Al11 Fe4 Fe4 110.12(19) 1_556 5_657 ?
Al11 Fe4 Fe4 110.12(19) 6_556 5_657 ?
Al15 Fe4 Fe4 54.14(12) 7_556 5_657 ?
Al15 Fe4 Fe4 54.14(12) 3_546 5_657 ?
Al6 Fe4 Fe4 52.8(2) . 5_657 ?
Al8 Fe4 Fe4 111.5(3) . 5_657 ?
Al10 Fe4 Fe4 114.14(17) 4_546 5_657 ?
Al10 Fe4 Fe4 114.14(17) 7_556 5_657 ?
Al2 Fe5 Al14 75.1(2) . . ?
Al2 Fe5 Al8 132.3(3) . 7_556 ?
Al14 Fe5 Al8 111.7(2) . 7_556 ?
Al2 Fe5 Al11 75.5(3) . . ?
Al14 Fe5 Al11 136.7(2) . . ?
Al8 Fe5 Al11 111.6(2) 7_556 . ?
Al2 Fe5 Al9 131.9(3) . 7_556 ?
Al14 Fe5 Al9 119.4(2) . 7_556 ?
Al8 Fe5 Al9 87.6(2) 7_556 7_556 ?
Al11 Fe5 Al9 63.5(2) . 7_556 ?
Al2 Fe5 Al10 76.8(2) . . ?
Al14 Fe5 Al10 132.9(2) . . ?
Al8 Fe5 Al10 64.59(19) 7_556 . ?
Al11 Fe5 Al10 67.98(19) . . ?
Al9 Fe5 Al10 107.6(2) 7_556 . ?
Al2 Fe5 Al12 76.8(3) . . ?
Al14 Fe5 Al12 70.10(19) . . ?
Al8 Fe5 Al12 63.4(2) 7_556 . ?
Al11 Fe5 Al12 131.3(2) . . ?
Al9 Fe5 Al12 150.2(2) 7_556 . ?
Al10 Fe5 Al12 67.15(19) . . ?
Al2 Fe5 Al13 78.8(3) . . ?
Al14 Fe5 Al13 76.07(19) . . ?
Al8 Fe5 Al13 148.7(2) 7_556 . ?
Al11 Fe5 Al13 67.56(19) . . ?
Al9 Fe5 Al13 63.5(2) 7_556 . ?
Al10 Fe5 Al13 133.2(2) . . ?
Al12 Fe5 Al13 142.26(19) . . ?
Al2 Fe5 Al4 128.7(2) . 7_556 ?
Al14 Fe5 Al4 63.0(2) . 7_556 ?
Al8 Fe5 Al4 91.6(2) 7_556 7_556 ?
Al11 Fe5 Al4 116.6(3) . 7_556 ?
Al9 Fe5 Al4 59.5(2) 7_556 7_556 ?
Al10 Fe5 Al4 154.4(2) . 7_556 ?
Al12 Fe5 Al4 112.0(2) . 7_556 ?
Al13 Fe5 Al4 64.2(2) . 7_556 ?
Fe3 Al1 Fe1 165.6(4) 1_554 . ?
Fe3 Al1 Al9 126.0(4) 1_554 5_556 ?
Fe1 Al1 Al9 68.4(3) . 5_556 ?
Fe3 Al1 Fe3 69.4(2) 1_554 5_556 ?
Fe1 Al1 Fe3 125.0(4) . 5_556 ?
Al9 Al1 Fe3 56.6(3) 5_556 5_556 ?
Fe3 Al1 Al10 55.9(2) 1_554 6 ?
Fe1 Al1 Al10 114.0(3) . 6 ?
Al9 Al1 Al10 140.53(18) 5_556 6 ?
Fe3 Al1 Al10 108.4(2) 5_556 6 ?
Fe3 Al1 Al10 55.9(2) 1_554 . ?
Fe1 Al1 Al10 114.0(3) . . ?
Al9 Al1 Al10 140.53(18) 5_556 . ?
Fe3 Al1 Al10 108.4(2) 5_556 . ?
Al10 Al1 Al10 76.9(3) 6 . ?
Fe3 Al1 Al12 115.8(3) 1_554 6 ?
Fe1 Al1 Al12 54.43(18) . 6 ?
Al9 Al1 Al12 105.3(3) 5_556 6 ?
Fe3 Al1 Al12 139.0(2) 5_556 6 ?
Al10 Al1 Al12 60.0(2) 6 6 ?
Al10 Al1 Al12 106.5(3) . 6 ?
Fe3 Al1 Al12 115.8(3) 1_554 . ?
Fe1 Al1 Al12 54.43(18) . . ?
Al9 Al1 Al12 105.3(3) 5_556 . ?
Fe3 Al1 Al12 139.0(2) 5_556 . ?
Al10 Al1 Al12 106.5(3) 6 . ?
Al10 Al1 Al12 60.0(2) . . ?
Al12 Al1 Al12 78.2(3) 6 . ?
Fe3 Al1 Al15 54.45(15) 1_554 5 ?
Fe1 Al1 Al15 132.0(2) . 5 ?
Al9 Al1 Al15 89.8(2) 5_556 5 ?
Fe3 Al1 Al15 52.84(14) 5_556 5 ?
Al10 Al1 Al15 58.47(16) 6 5 ?
Al10 Al1 Al15 109.8(3) . 5 ?
Al12 Al1 Al15 95.22(16) 6 5 ?
Al12 Al1 Al15 164.6(4) . 5 ?
Fe3 Al1 Al15 54.45(15) 1_554 . ?
Fe1 Al1 Al15 132.0(2) . . ?
Al9 Al1 Al15 89.8(2) 5_556 . ?
Fe3 Al1 Al15 52.84(14) 5_556 . ?
Al10 Al1 Al15 109.8(3) 6 . ?
Al10 Al1 Al15 58.47(16) . . ?
Al12 Al1 Al15 164.6(4) 6 . ?
Al12 Al1 Al15 95.22(16) . . ?
Al15 Al1 Al15 87.7(3) 5 . ?
Fe5 Al2 Fe5 178.1(4) . 6 ?
Fe5 Al2 Al14 53.77(15) . . ?
Fe5 Al2 Al14 128.1(3) 6 . ?
Fe5 Al2 Al14 128.1(3) . 6 ?
Fe5 Al2 Al14 53.77(15) 6 6 ?
Al14 Al2 Al14 74.3(3) . 6 ?
Fe5 Al2 Al11 124.2(3) . 6 ?
Fe5 Al2 Al11 54.39(17) 6 6 ?
Al14 Al2 Al11 154.5(4) . 6 ?
Al14 Al2 Al11 102.20(17) 6 6 ?
Fe5 Al2 Al11 54.39(17) . . ?
Fe5 Al2 Al11 124.2(3) 6 . ?
Al14 Al2 Al11 102.20(17) . . ?
Al14 Al2 Al11 154.5(4) 6 . ?
Al11 Al2 Al11 69.8(3) 6 . ?
Fe2 Al3 Fe1 160.4(4) . . ?
Fe2 Al3 Al14 121.77(19) . 4_546 ?
Fe1 Al3 Al14 64.5(2) . 4_546 ?
Fe2 Al3 Al14 121.77(19) . 7_556 ?
Fe1 Al3 Al14 64.5(2) . 7_556 ?
Al14 Al3 Al14 111.7(4) 4_546 7_556 ?
Fe2 Al3 Al4 143.0(4) . . ?
Fe1 Al3 Al4 56.7(3) . . ?
Al14 Al3 Al4 57.5(2) 4_546 . ?
Al14 Al3 Al4 57.5(2) 7_556 . ?
Fe2 Al3 Al8 61.5(3) . . ?
Fe1 Al3 Al8 138.1(4) . . ?
Al14 Al3 Al8 94.6(3) 4_546 . ?
Al14 Al3 Al8 94.6(3) 7_556 . ?
Al4 Al3 Al8 81.4(3) . . ?
Fe2 Al3 Al12 60.53(19) . 7_556 ?
Fe1 Al3 Al12 126.0(2) . 7_556 ?
Al14 Al3 Al12 147.0(4) 4_546 7_556 ?
Al14 Al3 Al12 62.29(17) 7_556 7_556 ?
Al4 Al3 Al12 99.7(3) . 7_556 ?
Al8 Al3 Al12 55.89(17) . 7_556 ?
Fe2 Al3 Al12 60.53(19) . 4_546 ?
Fe1 Al3 Al12 126.0(2) . 4_546 ?
Al14 Al3 Al12 62.29(17) 4_546 4_546 ?
Al14 Al3 Al12 147.0(4) 7_556 4_546 ?
Al4 Al3 Al12 99.7(3) . 4_546 ?
Al8 Al3 Al12 55.89(17) . 4_546 ?
Al12 Al3 Al12 103.9(3) 7_556 4_546 ?
Fe2 Al3 Al14 54.8(2) . 6 ?
Fe1 Al3 Al14 111.4(2) . 6 ?
Al14 Al3 Al14 84.0(2) 4_546 6 ?
Al14 Al3 Al14 156.9(3) 7_556 6 ?
Al4 Al3 Al14 141.43(17) . 6 ?
Al8 Al3 Al14 101.2(3) . 6 ?
Al12 Al3 Al14 113.7(3) 7_556 6 ?
Al12 Al3 Al14 55.05(19) 4_546 6 ?
Fe2 Al3 Al14 54.8(2) . . ?
Fe1 Al3 Al14 111.4(2) . . ?
Al14 Al3 Al14 156.9(3) 4_546 . ?
Al14 Al3 Al14 84.0(2) 7_556 . ?
Al4 Al3 Al14 141.43(17) . . ?
Al8 Al3 Al14 101.2(3) . . ?
Al12 Al3 Al14 55.05(19) 7_556 . ?
Al12 Al3 Al14 113.7(3) 4_546 . ?
Al14 Al3 Al14 76.4(3) 6 . ?
Fe2 Al3 Al12 113.6(3) . 6 ?
Fe1 Al3 Al12 52.44(17) . 6 ?
Al14 Al3 Al12 55.07(18) 4_546 6 ?
Al14 Al3 Al12 114.9(3) 7_556 6 ?
Al4 Al3 Al12 95.6(3) . 6 ?
Al8 Al3 Al12 143.09(13) . 6 ?
Al12 Al3 Al12 157.9(3) 7_556 6 ?
Al12 Al3 Al12 88.92(15) 4_546 6 ?
Al14 Al3 Al12 59.35(19) 6 6 ?
Al14 Al3 Al12 103.5(3) . 6 ?
Fe2 Al3 Al12 113.6(3) . . ?
Fe1 Al3 Al12 52.44(17) . . ?
Al14 Al3 Al12 114.9(3) 4_546 . ?
Al14 Al3 Al12 55.07(18) 7_556 . ?
Al4 Al3 Al12 95.6(3) . . ?
Al8 Al3 Al12 143.09(13) . . ?
Al12 Al3 Al12 88.92(15) 7_556 . ?
Al12 Al3 Al12 157.9(3) 4_546 . ?
Al14 Al3 Al12 103.5(3) 6 . ?
Al14 Al3 Al12 59.35(19) . . ?
Al12 Al3 Al12 73.8(3) 6 . ?
Al4 Al4 Fe1 63.0(3) 5_556 . ?
Al4 Al4 Al9 125.3(6) 5_556 . ?
Fe1 Al4 Al9 171.7(5) . . ?
Al4 Al4 Fe5 139.75(17) 5_556 7_556 ?
Fe1 Al4 Fe5 116.1(3) . 7_556 ?
Al9 Al4 Fe5 58.2(2) . 7_556 ?
Al4 Al4 Fe5 139.75(16) 5_556 4_546 ?
Fe1 Al4 Fe5 116.1(3) . 4_546 ?
Al9 Al4 Fe5 58.2(2) . 4_546 ?
Fe5 Al4 Fe5 79.2(2) 7_556 4_546 ?
Al4 Al4 Fe1 58.6(4) 5_556 5_556 ?
Fe1 Al4 Fe1 121.6(3) . 5_556 ?
Al9 Al4 Fe1 66.7(3) . 5_556 ?
Fe5 Al4 Fe1 107.9(3) 7_556 5_556 ?
Fe5 Al4 Fe1 107.9(3) 4_546 5_556 ?
Al4 Al4 Al14 95.8(3) 5_556 7_556 ?
Fe1 Al4 Al14 65.8(2) . 7_556 ?
Al9 Al4 Al14 111.1(2) . 7_556 ?
Fe5 Al4 Al14 55.47(15) 7_556 7_556 ?
Fe5 Al4 Al14 121.4(3) 4_546 7_556 ?
Fe1 Al4 Al14 119.3(2) 5_556 7_556 ?
Al4 Al4 Al14 95.8(3) 5_556 4_546 ?
Fe1 Al4 Al14 65.8(2) . 4_546 ?
Al9 Al4 Al14 111.1(2) . 4_546 ?
Fe5 Al4 Al14 121.4(3) 7_556 4_546 ?
Fe5 Al4 Al14 55.47(15) 4_546 4_546 ?
Fe1 Al4 Al14 119.3(2) 5_556 4_546 ?
Al14 Al4 Al14 117.1(4) 7_556 4_546 ?
Al4 Al4 Al13 88.2(3) 5_556 7_556 ?
Fe1 Al4 Al13 122.85(19) . 7_556 ?
Al9 Al4 Al13 60.5(2) . 7_556 ?
Fe5 Al4 Al13 57.35(16) 7_556 7_556 ?
Fe5 Al4 Al13 117.1(3) 4_546 7_556 ?
Fe1 Al4 Al13 56.7(2) 5_556 7_556 ?
Al14 Al4 Al13 69.95(17) 7_556 7_556 ?
Al14 Al4 Al13 171.3(3) 4_546 7_556 ?
Al4 Al4 Al13 88.2(3) 5_556 4_546 ?
Fe1 Al4 Al13 122.85(19) . 4_546 ?
Al9 Al4 Al13 60.5(2) . 4_546 ?
Fe5 Al4 Al13 117.1(3) 7_556 4_546 ?
Fe5 Al4 Al13 57.35(16) 4_546 4_546 ?
Fe1 Al4 Al13 56.7(2) 5_556 4_546 ?
Al14 Al4 Al13 171.3(3) 7_556 4_546 ?
Al14 Al4 Al13 69.95(17) 4_546 4_546 ?
Al13 Al4 Al13 102.6(4) 7_556 4_546 ?
Al4 Al4 Al3 119.8(5) 5_556 . ?
Fe1 Al4 Al3 56.8(2) . . ?
Al9 Al4 Al3 114.9(4) . . ?
Fe5 Al4 Al3 73.3(3) 7_556 . ?
Fe5 Al4 Al3 73.3(2) 4_546 . ?
Fe1 Al4 Al3 178.4(4) 5_556 . ?
Al14 Al4 Al3 60.4(2) 7_556 . ?
Al14 Al4 Al3 60.4(2) 4_546 . ?
Al13 Al4 Al3 123.9(2) 7_556 . ?
Al13 Al4 Al3 123.9(2) 4_546 . ?
Fe4 Al5 Fe3 165.4(4) . . ?
Fe4 Al5 Al9 137.4(4) . . ?
Fe3 Al5 Al9 57.1(3) . . ?
Fe4 Al5 Al10 62.8(2) . 7_556 ?
Fe3 Al5 Al10 122.3(2) . 7_556 ?
Al9 Al5 Al10 95.1(2) . 7_556 ?
Fe4 Al5 Al10 62.8(2) . 4_546 ?
Fe3 Al5 Al10 122.3(2) . 4_546 ?
Al9 Al5 Al10 95.1(2) . 4_546 ?
Al10 Al5 Al10 108.4(4) 7_556 4_546 ?
Fe4 Al5 Al11 55.7(2) . 1_556 ?
Fe3 Al5 Al11 113.8(3) . 1_556 ?
Al9 Al5 Al11 142.64(15) . 1_556 ?
Al10 Al5 Al11 57.06(18) 7_556 1_556 ?
Al10 Al5 Al11 116.1(3) 4_546 1_556 ?
Fe4 Al5 Al11 55.7(2) . 6_556 ?
Fe3 Al5 Al11 113.8(3) . 6_556 ?
Al9 Al5 Al11 142.64(15) . 6_556 ?
Al10 Al5 Al11 116.1(3) 7_556 6_556 ?
Al10 Al5 Al11 57.06(17) 4_546 6_556 ?
Al11 Al5 Al11 74.6(3) 1_556 6_556 ?
Fe4 Al5 Al8 59.5(3) . . ?
Fe3 Al5 Al8 135.0(4) . . ?
Al9 Al5 Al8 77.9(3) . . ?
Al10 Al5 Al8 56.90(19) 7_556 . ?
Al10 Al5 Al8 56.90(19) 4_546 . ?
Al11 Al5 Al8 101.5(3) 1_556 . ?
Al11 Al5 Al8 101.5(3) 6_556 . ?
Fe4 Al5 Al11 121.8(2) . 4_546 ?
Fe3 Al5 Al11 63.1(2) . 4_546 ?
Al9 Al5 Al11 56.81(17) . 4_546 ?
Al10 Al5 Al11 144.9(3) 7_556 4_546 ?
Al10 Al5 Al11 59.54(18) 4_546 4_546 ?
Al11 Al5 Al11 157.5(3) 1_556 4_546 ?
Al11 Al5 Al11 86.23(17) 6_556 4_546 ?
Al8 Al5 Al11 93.7(2) . 4_546 ?
Fe4 Al5 Al11 121.8(2) . 7_556 ?
Fe3 Al5 Al11 63.1(2) . 7_556 ?
Al9 Al5 Al11 56.81(17) . 7_556 ?
Al10 Al5 Al11 59.54(18) 7_556 7_556 ?
Al10 Al5 Al11 144.9(3) 4_546 7_556 ?
Al11 Al5 Al11 86.23(16) 1_556 7_556 ?
Al11 Al5 Al11 157.5(3) 6_556 7_556 ?
Al8 Al5 Al11 93.7(2) . 7_556 ?
Al11 Al5 Al11 109.4(3) 4_546 7_556 ?
Fe4 Al5 Al10 114.7(3) . 1_556 ?
Fe3 Al5 Al10 55.0(2) . 1_556 ?
Al9 Al5 Al10 98.5(3) . 1_556 ?
Al10 Al5 Al10 86.74(18) 7_556 1_556 ?
Al10 Al5 Al10 158.6(3) 4_546 1_556 ?
Al11 Al5 Al10 59.2(2) 1_556 1_556 ?
Al11 Al5 Al10 103.0(3) 6_556 1_556 ?
Al8 Al5 Al10 142.48(15) . 1_556 ?
Al11 Al5 Al10 115.8(4) 4_546 1_556 ?
Al11 Al5 Al10 56.00(18) 7_556 1_556 ?
Fe4 Al5 Al10 114.7(3) . 6_556 ?
Fe3 Al5 Al10 55.0(2) . 6_556 ?
Al9 Al5 Al10 98.5(3) . 6_556 ?
Al10 Al5 Al10 158.6(3) 7_556 6_556 ?
Al10 Al5 Al10 86.74(18) 4_546 6_556 ?
Al11 Al5 Al10 103.0(3) 1_556 6_556 ?
Al11 Al5 Al10 59.2(2) 6_556 6_556 ?
Al8 Al5 Al10 142.48(15) . 6_556 ?
Al11 Al5 Al10 56.00(18) 4_546 6_556 ?
Al11 Al5 Al10 115.8(4) 7_556 6_556 ?
Al10 Al5 Al10 75.0(3) 1_556 6_556 ?
Fe4 Al6 Fe2 161.8(4) 5_657 . ?
Fe4 Al6 Al8 132.8(4) 5_657 . ?
Fe2 Al6 Al8 65.4(3) . . ?
Fe4 Al6 Fe4 71.0(2) 5_657 . ?
Fe2 Al6 Fe4 127.2(4) . . ?
Al8 Al6 Fe4 61.8(3) . . ?
Fe4 Al6 Al11 55.06(18) 5_657 2_656 ?
Fe2 Al6 Al11 111.7(3) . 2_656 ?
Al8 Al6 Al11 142.95(16) . 2_656 ?
Fe4 Al6 Al11 109.9(2) . 2_656 ?
Fe4 Al6 Al11 55.06(18) 5_657 5_656 ?
Fe2 Al6 Al11 111.7(3) . 5_656 ?
Al8 Al6 Al11 142.95(16) . 5_656 ?
Fe4 Al6 Al11 109.9(2) . 5_656 ?
Al11 Al6 Al11 73.9(3) 2_656 5_656 ?
Fe4 Al6 Al13 114.5(3) 5_657 5_656 ?
Fe2 Al6 Al13 53.75(18) . 5_656 ?
Al8 Al6 Al13 100.5(3) . 5_656 ?
Fe4 Al6 Al13 137.1(2) . 5_656 ?
Al11 Al6 Al13 106.2(3) 2_656 5_656 ?
Al11 Al6 Al13 59.5(2) 5_656 5_656 ?
Fe4 Al6 Al13 114.5(3) 5_657 2_656 ?
Fe2 Al6 Al13 53.75(18) . 2_656 ?
Al8 Al6 Al13 100.5(3) . 2_656 ?
Fe4 Al6 Al13 137.1(2) . 2_656 ?
Al11 Al6 Al13 59.5(2) 2_656 2_656 ?
Al11 Al6 Al13 106.2(3) 5_656 2_656 ?
Al13 Al6 Al13 81.8(3) 5_656 2_656 ?
Fe4 Al6 Al15 55.03(15) 5_657 7_556 ?
Fe2 Al6 Al15 132.55(17) . 7_556 ?
Al8 Al6 Al15 94.6(3) . 7_556 ?
Fe4 Al6 Al15 54.17(16) . 7_556 ?
Al11 Al6 Al15 58.97(16) 2_656 7_556 ?
Al11 Al6 Al15 109.2(3) 5_656 7_556 ?
Al13 Al6 Al15 164.6(4) 5_656 7_556 ?
Al13 Al6 Al15 92.54(15) 2_656 7_556 ?
Fe4 Al6 Al15 55.03(15) 5_657 3_546 ?
Fe2 Al6 Al15 132.55(17) . 3_546 ?
Al8 Al6 Al15 94.6(3) . 3_546 ?
Fe4 Al6 Al15 54.17(16) . 3_546 ?
Al11 Al6 Al15 109.2(3) 2_656 3_546 ?
Al11 Al6 Al15 58.97(16) 5_656 3_546 ?
Al13 Al6 Al15 92.54(15) 5_656 3_546 ?
Al13 Al6 Al15 164.6(4) 2_656 3_546 ?
Al15 Al6 Al15 89.3(3) 7_556 3_546 ?
Fe2 Al7 Fe2 180.0 5_656 . ?
Fe2 Al7 Al14 123.17(13) 5_656 . ?
Fe2 Al7 Al14 56.83(13) . . ?
Fe2 Al7 Al14 123.17(13) 5_656 6 ?
Fe2 Al7 Al14 56.83(13) . 6 ?
Al14 Al7 Al14 81.9(2) . 6 ?
Fe2 Al7 Al14 56.83(13) 5_656 2_656 ?
Fe2 Al7 Al14 123.17(13) . 2_656 ?
Al14 Al7 Al14 98.1(2) . 2_656 ?
Al14 Al7 Al14 180.00(17) 6 2_656 ?
Fe2 Al7 Al14 56.83(13) 5_656 5_656 ?
Fe2 Al7 Al14 123.17(13) . 5_656 ?
Al14 Al7 Al14 180.0 . 5_656 ?
Al14 Al7 Al14 98.1(2) 6 5_656 ?
Al14 Al7 Al14 81.9(2) 2_656 5_656 ?
Fe2 Al7 Al13 125.22(13) 5_656 2_656 ?
Fe2 Al7 Al13 54.78(13) . 2_656 ?
Al14 Al7 Al13 59.40(15) . 2_656 ?
Al14 Al7 Al13 111.53(17) 6 2_656 ?
Al14 Al7 Al13 68.47(17) 2_656 2_656 ?
Al14 Al7 Al13 120.60(15) 5_656 2_656 ?
Fe2 Al7 Al13 54.78(13) 5_656 6 ?
Fe2 Al7 Al13 125.22(13) . 6 ?
Al14 Al7 Al13 120.60(15) . 6 ?
Al14 Al7 Al13 68.47(17) 6 6 ?
Al14 Al7 Al13 111.53(17) 2_656 6 ?
Al14 Al7 Al13 59.40(15) 5_656 6 ?
Al13 Al7 Al13 180.0 2_656 6 ?
Fe2 Al7 Al13 125.22(13) 5_656 5_656 ?
Fe2 Al7 Al13 54.78(13) . 5_656 ?
Al14 Al7 Al13 111.53(17) . 5_656 ?
Al14 Al7 Al13 59.40(15) 6 5_656 ?
Al14 Al7 Al13 120.60(15) 2_656 5_656 ?
Al14 Al7 Al13 68.47(17) 5_656 5_656 ?
Al13 Al7 Al13 83.9(2) 2_656 5_656 ?
Al13 Al7 Al13 96.1(2) 6 5_656 ?
Fe2 Al7 Al13 54.78(13) 5_656 . ?
Fe2 Al7 Al13 125.22(13) . . ?
Al14 Al7 Al13 68.47(17) . . ?
Al14 Al7 Al13 120.60(15) 6 . ?
Al14 Al7 Al13 59.40(15) 2_656 . ?
Al14 Al7 Al13 111.53(17) 5_656 . ?
Al13 Al7 Al13 96.1(2) 2_656 . ?
Al13 Al7 Al13 83.9(2) 6 . ?
Al13 Al7 Al13 180.0 5_656 . ?
Fe5 Al8 Fe5 83.8(3) 4_546 7_556 ?
Fe5 Al8 Al6 137.96(15) 4_546 . ?
Fe5 Al8 Al6 137.96(15) 7_556 . ?
Fe5 Al8 Fe4 114.7(3) 4_546 . ?
Fe5 Al8 Fe4 114.7(3) 7_556 . ?
Al6 Al8 Fe4 59.5(3) . . ?
Fe5 Al8 Al12 59.86(17) 4_546 4_546 ?
Fe5 Al8 Al12 128.6(3) 7_556 4_546 ?
Al6 Al8 Al12 83.4(3) . 4_546 ?
Fe4 Al8 Al12 113.2(2) . 4_546 ?
Fe5 Al8 Al12 128.6(3) 4_546 7_556 ?
Fe5 Al8 Al12 59.86(17) 7_556 7_556 ?
Al6 Al8 Al12 83.4(3) . 7_556 ?
Fe4 Al8 Al12 113.2(2) . 7_556 ?
Al12 Al8 Al12 114.9(4) 4_546 7_556 ?
Fe5 Al8 Al10 127.6(4) 4_546 7_556 ?
Fe5 Al8 Al10 58.21(16) 7_556 7_556 ?
Al6 Al8 Al10 88.7(2) . 7_556 ?
Fe4 Al8 Al10 62.35(18) . 7_556 ?
Al12 Al8 Al10 172.1(4) 4_546 7_556 ?
Al12 Al8 Al10 63.70(17) 7_556 7_556 ?
Fe5 Al8 Al10 58.21(16) 4_546 4_546 ?
Fe5 Al8 Al10 127.6(4) 7_556 4_546 ?
Al6 Al8 Al10 88.7(2) . 4_546 ?
Fe4 Al8 Al10 62.35(18) . 4_546 ?
Al12 Al8 Al10 63.70(17) 4_546 4_546 ?
Al12 Al8 Al10 172.1(4) 7_556 4_546 ?
Al10 Al8 Al10 116.5(4) 7_556 4_546 ?
Fe5 Al8 Fe2 111.9(2) 4_546 . ?
Fe5 Al8 Fe2 111.9(2) 7_556 . ?
Al6 Al8 Fe2 56.3(3) . . ?
Fe4 Al8 Fe2 115.8(3) . . ?
Al12 Al8 Fe2 59.9(2) 4_546 . ?
Al12 Al8 Fe2 59.9(2) 7_556 . ?
Al10 Al8 Fe2 115.1(2) 7_556 . ?
Al10 Al8 Fe2 115.1(2) 4_546 . ?
Fe5 Al8 Al5 76.3(3) 4_546 . ?
Fe5 Al8 Al5 76.3(3) 7_556 . ?
Al6 Al8 Al5 112.2(3) . . ?
Fe4 Al8 Al5 52.6(2) . . ?
Al12 Al8 Al5 122.0(2) 4_546 . ?
Al12 Al8 Al5 122.0(2) 7_556 . ?
Al10 Al8 Al5 61.4(2) 7_556 . ?
Al10 Al8 Al5 61.4(2) 4_546 . ?
Fe2 Al8 Al5 168.4(4) . . ?
Fe5 Al8 Al3 74.0(2) 4_546 . ?
Fe5 Al8 Al3 74.0(2) 7_556 . ?
Al6 Al8 Al3 108.2(4) . . ?
Fe4 Al8 Al3 167.7(4) . . ?
Al12 Al8 Al3 62.37(19) 4_546 . ?
Al12 Al8 Al3 62.37(19) 7_556 . ?
Al10 Al8 Al3 120.41(18) 7_556 . ?
Al10 Al8 Al3 120.41(18) 4_546 . ?
Fe2 Al8 Al3 51.9(2) . . ?
Al5 Al8 Al3 139.7(4) . . ?
Fe3 Al9 Fe5 119.5(2) . 7_556 ?
Fe3 Al9 Fe5 119.5(2) . 4_546 ?
Fe5 Al9 Fe5 83.2(3) 7_556 4_546 ?
Fe3 Al9 Al4 177.3(5) . . ?
Fe5 Al9 Al4 62.3(2) 7_556 . ?
Fe5 Al9 Al4 62.3(2) 4_546 . ?
Fe3 Al9 Al1 63.8(3) . 5_556 ?
Fe5 Al9 Al1 136.26(18) 7_556 5_556 ?
Fe5 Al9 Al1 136.26(18) 4_546 5_556 ?
Al4 Al9 Al1 113.5(4) . 5_556 ?
Fe3 Al9 Al11 66.3(2) . 7_556 ?
Fe5 Al9 Al11 58.15(17) 7_556 7_556 ?
Fe5 Al9 Al11 130.0(4) 4_546 7_556 ?
Al4 Al9 Al11 114.4(2) . 7_556 ?
Al1 Al9 Al11 92.6(3) 5_556 7_556 ?
Fe3 Al9 Al11 66.3(2) . 4_546 ?
Fe5 Al9 Al11 130.0(4) 7_556 4_546 ?
Fe5 Al9 Al11 58.15(16) 4_546 4_546 ?
Al4 Al9 Al11 114.4(2) . 4_546 ?
Al1 Al9 Al11 92.6(3) 5_556 4_546 ?
Al11 Al9 Al11 123.7(3) 7_556 4_546 ?
Fe3 Al9 Al13 115.1(2) . 4_546 ?
Fe5 Al9 Al13 124.1(3) 7_556 4_546 ?
Fe5 Al9 Al13 59.56(17) 4_546 4_546 ?
Al4 Al9 Al13 63.7(2) . 4_546 ?
Al1 Al9 Al13 79.2(3) 5_556 4_546 ?
Al11 Al9 Al13 169.2(4) 7_556 4_546 ?
Al11 Al9 Al13 64.26(15) 4_546 4_546 ?
Fe3 Al9 Al13 115.1(2) . 7_556 ?
Fe5 Al9 Al13 59.56(17) 7_556 7_556 ?
Fe5 Al9 Al13 124.1(3) 4_546 7_556 ?
Al4 Al9 Al13 63.7(2) . 7_556 ?
Al1 Al9 Al13 79.2(3) 5_556 7_556 ?
Al11 Al9 Al13 64.26(15) 7_556 7_556 ?
Al11 Al9 Al13 169.2(4) 4_546 7_556 ?
Al13 Al9 Al13 106.9(3) 4_546 7_556 ?
Fe3 Al9 Al5 56.6(3) . . ?
Fe5 Al9 Al5 78.5(3) 7_556 . ?
Fe5 Al9 Al5 78.5(3) 4_546 . ?
Al4 Al9 Al5 126.0(5) . . ?
Al1 Al9 Al5 120.4(4) 5_556 . ?
Al11 Al9 Al5 64.64(18) 7_556 . ?
Al11 Al9 Al5 64.64(18) 4_546 . ?
Al13 Al9 Al5 125.61(18) 4_546 . ?
Al13 Al9 Al5 125.61(18) 7_556 . ?
Fe3 Al9 Fe1 119.1(4) . 5_556 ?
Fe5 Al9 Fe1 104.6(2) 7_556 5_556 ?
Fe5 Al9 Fe1 104.6(2) 4_546 5_556 ?
Al4 Al9 Fe1 58.2(3) . 5_556 ?
Al1 Al9 Fe1 55.4(2) 5_556 5_556 ?
Al11 Al9 Fe1 114.4(2) 7_556 5_556 ?
Al11 Al9 Fe1 114.4(2) 4_546 5_556 ?
Al13 Al9 Fe1 55.14(17) 4_546 5_556 ?
Al13 Al9 Fe1 55.14(17) 7_556 5_556 ?
Al5 Al9 Fe1 175.8(4) . 5_556 ?
Fe3 Al10 Fe5 149.3(3) 1_554 . ?
Fe3 Al10 Al8 148.3(3) 1_554 7_556 ?
Fe5 Al10 Al8 57.2(2) . 7_556 ?
Fe3 Al10 Al11 65.27(18) 1_554 7 ?
Fe5 Al10 Al11 135.2(3) . 7 ?
Al8 Al10 Al11 108.7(3) 7_556 7 ?
Fe3 Al10 Fe4 101.0(2) 1_554 7_556 ?
Fe5 Al10 Fe4 109.7(2) . 7_556 ?
Al8 Al10 Fe4 57.78(19) 7_556 7_556 ?
Al11 Al10 Fe4 54.11(17) 7 7_556 ?
Fe3 Al10 Al15 55.69(19) 1_554 . ?
Fe5 Al10 Al15 148.0(3) . . ?
Al8 Al10 Al15 93.4(3) 7_556 . ?
Al11 Al10 Al15 61.68(18) 7 . ?
Fe4 Al10 Al15 53.44(18) 7_556 . ?
Fe3 Al10 Al11 112.9(3) 1_554 . ?
Fe5 Al10 Al11 55.70(17) . . ?
Al8 Al10 Al11 97.7(3) 7_556 . ?
Al11 Al10 Al11 89.5(2) 7 . ?
Fe4 Al10 Al11 112.0(2) 7_556 . ?
Al15 Al10 Al11 151.1(2) . . ?
Fe3 Al10 Al5 126.3(3) 1_554 7_556 ?
Fe5 Al10 Al5 76.0(2) . 7_556 ?
Al8 Al10 Al5 61.7(2) 7_556 7_556 ?
Al11 Al10 Al5 61.6(2) 7 7_556 ?
Fe4 Al10 Al5 51.6(2) 7_556 7_556 ?
Al15 Al10 Al5 102.5(2) . 7_556 ?
Al11 Al10 Al5 60.9(2) . 7_556 ?
Fe3 Al10 Al1 54.5(2) 1_554 . ?
Fe5 Al10 Al1 111.4(2) . . ?
Al8 Al10 Al1 107.9(3) 7_556 . ?
Al11 Al10 Al1 113.3(3) 7 . ?
Fe4 Al10 Al1 111.0(3) 7_556 . ?
Al15 Al10 Al1 62.4(2) . . ?
Al11 Al10 Al1 136.8(3) . . ?
Al5 Al10 Al1 162.3(3) 7_556 . ?
Fe3 Al10 Al12 114.6(3) 1_554 . ?
Fe5 Al10 Al12 57.40(18) . . ?
Al8 Al10 Al12 57.9(2) 7_556 . ?
Al11 Al10 Al12 156.3(3) 7 . ?
Fe4 Al10 Al12 105.0(2) 7_556 . ?
Al15 Al10 Al12 97.8(2) . . ?
Al11 Al10 Al12 110.6(2) . . ?
Al5 Al10 Al12 116.8(3) 7_556 . ?
Al1 Al10 Al12 60.2(2) . . ?
Fe3 Al10 Al5 53.9(2) 1_554 1_554 ?
Fe5 Al10 Al5 110.4(3) . 1_554 ?
Al8 Al10 Al5 153.3(3) 7_556 1_554 ?
Al11 Al10 Al5 61.5(2) 7 1_554 ?
Fe4 Al10 Al5 115.2(2) 7_556 1_554 ?
Al15 Al10 Al5 101.6(2) . 1_554 ?
Al11 Al10 Al5 59.3(2) . 1_554 ?
Al5 Al10 Al5 93.26(18) 7_556 1_554 ?
Al1 Al10 Al5 98.7(2) . 1_554 ?
Al12 Al10 Al5 139.4(3) . 1_554 ?
Fe4 Al11 Fe5 151.6(3) 1_554 . ?
Fe4 Al11 Al9 145.8(3) 1_554 7_556 ?
Fe5 Al11 Al9 58.4(2) . 7_556 ?
Fe4 Al11 Al10 64.14(18) 1_554 7 ?
Fe5 Al11 Al10 136.4(3) . 7 ?
Al9 Al11 Al10 104.8(3) 7_556 7 ?
Fe4 Al11 Fe3 100.1(2) 1_554 7_556 ?
Fe5 Al11 Fe3 108.3(2) . 7_556 ?
Al9 Al11 Fe3 53.9(2) 7_556 7_556 ?
Al10 Al11 Fe3 53.93(17) 7 7_556 ?
Fe4 Al11 Al10 115.2(2) 1_554 . ?
Fe5 Al11 Al10 56.33(18) . . ?
Al9 Al11 Al10 96.3(3) 7_556 . ?
Al10 Al11 Al10 90.5(2) 7 . ?
Fe3 Al11 Al10 110.8(2) 7_556 . ?
Fe4 Al11 Al15 55.8(2) 1_554 7 ?
Fe5 Al11 Al15 145.1(3) . 7 ?
Al9 Al11 Al15 90.1(3) 7_556 7 ?
Al10 Al11 Al15 61.04(18) 7 7 ?
Fe3 Al11 Al15 52.5(2) 7_556 7 ?
Al10 Al11 Al15 151.5(2) . 7 ?
Fe4 Al11 Al5 54.0(2) 1_554 1_554 ?
Fe5 Al11 Al5 112.9(3) . 1_554 ?
Al9 Al11 Al5 151.8(3) 7_556 1_554 ?
Al10 Al11 Al5 61.4(2) 7 1_554 ?
Fe3 Al11 Al5 114.9(2) 7_556 1_554 ?
Al10 Al11 Al5 61.5(2) . 1_554 ?
Al15 Al11 Al5 101.9(3) 7 1_554 ?
Fe4 Al11 Al13 115.4(2) 1_554 . ?
Fe5 Al11 Al13 57.54(17) . . ?
Al9 Al11 Al13 58.6(2) 7_556 . ?
Al10 Al11 Al13 152.1(3) 7 . ?
Fe3 Al11 Al13 101.2(2) 7_556 . ?
Al10 Al11 Al13 112.4(3) . . ?
Al15 Al11 Al13 94.7(2) 7 . ?
Al5 Al11 Al13 143.4(3) 1_554 . ?
Fe4 Al11 Al6 54.66(19) 1_554 5_656 ?
Fe5 Al11 Al6 111.9(2) . 5_656 ?
Al9 Al11 Al6 108.6(3) 7_556 5_656 ?
Al10 Al11 Al6 111.6(3) 7 5_656 ?
Fe3 Al11 Al6 109.1(3) 7_556 5_656 ?
Al10 Al11 Al6 140.1(3) . 5_656 ?
Al15 Al11 Al6 61.1(2) 7 5_656 ?
Al5 Al11 Al6 99.5(2) 1_554 5_656 ?
Al13 Al11 Al6 60.8(2) . 5_656 ?
Fe4 Al11 Al5 126.2(3) 1_554 7_556 ?
Fe5 Al11 Al5 75.6(2) . 7_556 ?
Al9 Al11 Al5 58.5(2) 7_556 7_556 ?
Al10 Al11 Al5 62.5(2) 7 7_556 ?
Fe3 Al11 Al5 51.5(2) 7_556 7_556 ?
Al10 Al11 Al5 59.6(2) . 7_556 ?
Al15 Al11 Al5 101.9(3) 7 7_556 ?
Al5 Al11 Al5 93.77(16) 1_554 7_556 ?
Al13 Al11 Al5 114.6(2) . 7_556 ?
Al6 Al11 Al5 160.2(3) 5_656 7_556 ?
Fe4 Al11 Al2 101.4(2) 1_554 . ?
Fe5 Al11 Al2 50.15(15) . . ?
Al9 Al11 Al2 104.6(3) 7_556 . ?
Al10 Al11 Al2 142.3(3) 7 . ?
Fe3 Al11 Al2 158.1(2) 7_556 . ?
Al10 Al11 Al2 63.2(2) . . ?
Al15 Al11 Al2 141.4(3) 7 . ?
Al5 Al11 Al2 81.7(2) 1_554 . ?
Al13 Al11 Al2 65.4(2) . . ?
Al6 Al11 Al2 80.3(2) 5_656 . ?
Al5 Al11 Al2 116.3(3) 7_556 . ?
Fe1 Al12 Fe5 146.5(3) . . ?
Fe1 Al12 Al14 66.7(2) . 7_556 ?
Fe5 Al12 Al14 130.9(3) . 7_556 ?
Fe1 Al12 Al8 152.0(3) . 7_556 ?
Fe5 Al12 Al8 56.7(2) . 7_556 ?
Al14 Al12 Al8 112.1(3) 7_556 7_556 ?
Fe1 Al12 Fe2 103.1(2) . 7_556 ?
Fe5 Al12 Fe2 110.2(2) . 7_556 ?
Al14 Al12 Fe2 55.10(17) 7_556 7_556 ?
Al8 Al12 Fe2 61.0(2) 7_556 7_556 ?
Fe1 Al12 Al10 115.8(2) . . ?
Fe5 Al12 Al10 55.45(17) . . ?
Al14 Al12 Al10 165.5(3) 7_556 . ?
Al8 Al12 Al10 58.4(2) 7_556 . ?
Fe2 Al12 Al10 111.5(2) 7_556 . ?
Fe1 Al12 Al1 56.5(2) . . ?
Fe5 Al12 Al1 109.3(3) . . ?
Al14 Al12 Al1 118.9(3) 7_556 . ?
Al8 Al12 Al1 107.9(2) 7_556 . ?
Fe2 Al12 Al1 117.1(3) 7_556 . ?
Al10 Al12 Al1 59.8(2) . . ?
Fe1 Al12 Al3 128.8(3) . 7_556 ?
Fe5 Al12 Al3 72.5(2) . 7_556 ?
Al14 Al12 Al3 62.7(2) 7_556 7_556 ?
Al8 Al12 Al3 61.7(2) 7_556 7_556 ?
Fe2 Al12 Al3 52.0(2) 7_556 7_556 ?
Al10 Al12 Al3 115.1(3) . 7_556 ?
Al1 Al12 Al3 167.0(3) . 7_556 ?
Fe1 Al12 Al13 56.89(18) . 8_455 ?
Fe5 Al12 Al13 153.8(2) . 8_455 ?
Al14 Al12 Al13 59.2(2) 7_556 8_455 ?
Al8 Al12 Al13 97.5(3) 7_556 8_455 ?
Fe2 Al12 Al13 52.00(17) 7_556 8_455 ?
Al10 Al12 Al13 109.2(2) . 8_455 ?
Al1 Al12 Al13 71.7(2) . 8_455 ?
Al3 Al12 Al13 100.9(3) 7_556 8_455 ?
Fe1 Al12 Al14 112.7(2) . . ?
Fe5 Al12 Al14 52.82(17) . . ?
Al14 Al12 Al14 85.1(2) 7_556 . ?
Al8 Al12 Al14 94.7(3) 7_556 . ?
Fe2 Al12 Al14 107.9(2) 7_556 . ?
Al10 Al12 Al14 105.8(3) . . ?
Al1 Al12 Al14 135.0(3) . . ?
Al3 Al12 Al14 56.7(2) 7_556 . ?
Al13 Al12 Al14 144.3(3) 8_455 . ?
Fe1 Al12 Al3 54.6(2) . . ?
Fe5 Al12 Al3 106.5(3) . . ?
Al14 Al12 Al3 57.8(2) 7_556 . ?
Al8 Al12 Al3 150.5(3) 7_556 . ?
Fe2 Al12 Al3 112.5(2) 7_556 . ?
Al10 Al12 Al3 136.0(3) . . ?
Al1 Al12 Al3 100.5(2) . . ?
Al3 Al12 Al3 91.08(15) 7_556 . ?
Al13 Al12 Al3 98.8(3) 8_455 . ?
Al14 Al12 Al3 58.5(2) . . ?
Fe2 Al13 Fe1 107.4(2) 5_656 3 ?
Fe2 Al13 Fe5 140.3(2) 5_656 . ?
Fe1 Al13 Fe5 111.2(2) 3 . ?
Fe2 Al13 Al9 155.1(3) 5_656 7_556 ?
Fe1 Al13 Al9 65.8(2) 3 7_556 ?
Fe5 Al13 Al9 56.9(2) . 7_556 ?
Fe2 Al13 Al14 56.61(17) 5_656 2_656 ?
Fe1 Al13 Al14 64.04(17) 3 2_656 ?
Fe5 Al13 Al14 136.8(3) . 2_656 ?
Al9 Al13 Al14 128.6(3) 7_556 2_656 ?
Fe2 Al13 Al4 143.4(3) 5_656 7_556 ?
Fe1 Al13 Al4 59.2(2) 3 7_556 ?
Fe5 Al13 Al4 58.5(2) . 7_556 ?
Al9 Al13 Al4 55.8(2) 7_556 7_556 ?
Al14 Al13 Al4 88.6(2) 2_656 7_556 ?
Fe2 Al13 Al7 55.39(13) 5_656 . ?
Fe1 Al13 Al7 118.47(19) 3 . ?
Fe5 Al13 Al7 96.8(2) . . ?
Al9 Al13 Al7 149.5(3) 7_556 . ?
Al14 Al13 Al7 58.42(16) 2_656 . ?
Al4 Al13 Al7 98.7(2) 7_556 . ?
Fe2 Al13 Al11 113.4(2) 5_656 . ?
Fe1 Al13 Al11 117.5(2) 3 . ?
Fe5 Al13 Al11 54.90(16) . . ?
Al9 Al13 Al11 57.11(18) 7_556 . ?
Al14 Al13 Al11 168.0(3) 2_656 . ?
Al4 Al13 Al11 102.4(3) 7_556 . ?
Al7 Al13 Al11 123.4(2) . . ?
Fe2 Al13 Al6 55.14(18) 5_656 5_656 ?
Fe1 Al13 Al6 122.0(3) 3 5_656 ?
Fe5 Al13 Al6 108.6(2) . 5_656 ?
Al9 Al13 Al6 106.6(2) 7_556 5_656 ?
Al14 Al13 Al6 108.8(3) 2_656 5_656 ?
Al4 Al13 Al6 161.4(3) 7_556 5_656 ?
Al7 Al13 Al6 96.09(19) . 5_656 ?
Al11 Al13 Al6 59.8(2) . 5_656 ?
Fe2 Al13 Al12 60.20(18) 5_656 8 ?
Fe1 Al13 Al12 53.51(17) 3 8 ?
Fe5 Al13 Al12 157.6(2) . 8 ?
Al9 Al13 Al12 100.8(3) 7_556 8 ?
Al14 Al13 Al12 56.23(19) 2_656 8 ?
Al4 Al13 Al12 112.2(3) 7_556 8 ?
Al7 Al13 Al12 105.0(2) . 8 ?
Al11 Al13 Al12 114.1(2) . 8 ?
Al6 Al13 Al12 74.4(2) 5_656 8 ?
Fe5 Al14 Fe2 147.9(3) . . ?
Fe5 Al14 Al12 142.3(3) . 7_556 ?
Fe2 Al14 Al12 63.42(19) . 7_556 ?
Fe5 Al14 Al4 61.6(2) . 7_556 ?
Fe2 Al14 Al4 141.9(3) . 7_556 ?
Al12 Al14 Al4 107.2(3) 7_556 7_556 ?
Fe5 Al14 Al7 102.9(2) . . ?
Fe2 Al14 Al7 56.62(15) . . ?
Al12 Al14 Al7 114.7(2) 7_556 . ?
Al4 Al14 Al7 104.2(3) 7_556 . ?
Fe5 Al14 Al3 76.7(2) . 7_556 ?
Fe2 Al14 Al3 129.8(3) . 7_556 ?
Al12 Al14 Al3 67.1(2) 7_556 7_556 ?
Al4 Al14 Al3 62.1(3) 7_556 7_556 ?
Al7 Al14 Al3 165.0(3) . 7_556 ?
Fe5 Al14 Al13 141.2(3) . 2_656 ?
Fe2 Al14 Al13 55.77(17) . 2_656 ?
Al12 Al14 Al13 64.5(2) 7_556 2_656 ?
Al4 Al14 Al13 86.4(2) 7_556 2_656 ?
Al7 Al14 Al13 62.18(16) . 2_656 ?
Al3 Al14 Al13 108.6(3) 7_556 2_656 ?
Fe5 Al14 Fe1 111.9(2) . 7_556 ?
Fe2 Al14 Fe1 99.54(19) . 7_556 ?
Al12 Al14 Fe1 53.55(18) 7_556 7_556 ?
Al4 Al14 Fe1 55.1(2) 7_556 7_556 ?
Al7 Al14 Fe1 113.7(2) . 7_556 ?
Al3 Al14 Fe1 54.34(19) 7_556 7_556 ?
Al13 Al14 Fe1 55.10(16) 2_656 7_556 ?
Fe5 Al14 Al3 113.7(2) . . ?
Fe2 Al14 Al3 53.7(2) . . ?
Al12 Al14 Al3 62.3(2) 7_556 . ?
Al4 Al14 Al3 158.0(3) 7_556 . ?
Al7 Al14 Al3 97.8(2) . . ?
Al3 Al14 Al3 95.98(19) 7_556 . ?
Al13 Al14 Al3 104.1(3) 2_656 . ?
Fe1 Al14 Al3 115.4(3) 7_556 . ?
Fe5 Al14 Al12 57.08(17) . . ?
Fe2 Al14 Al12 115.3(3) . . ?
Al12 Al14 Al12 94.9(2) 7_556 . ?
Al4 Al14 Al12 102.0(3) 7_556 . ?
Al7 Al14 Al12 131.6(2) . . ?
Al3 Al14 Al12 61.0(2) 7_556 . ?
Al13 Al14 Al12 159.4(3) 2_656 . ?
Fe1 Al14 Al12 114.7(2) 7_556 . ?
Al3 Al14 Al12 62.1(2) . . ?
Fe5 Al14 Al2 51.16(14) . . ?
Fe2 Al14 Al2 96.9(2) . . ?
Al12 Al14 Al2 142.7(3) 7_556 . ?
Al4 Al14 Al2 107.0(3) 7_556 . ?
Al7 Al14 Al2 69.89(19) . . ?
Al3 Al14 Al2 118.4(3) 7_556 . ?
Al13 Al14 Al2 132.1(3) 2_656 . ?
Fe1 Al14 Al2 162.0(3) 7_556 . ?
Al3 Al14 Al2 80.5(2) . . ?
Al12 Al14 Al2 63.8(2) . . ?
Fe3 Al15 Fe3 71.7(3) 5_556 1_554 ?
Fe3 Al15 Fe4 173.09(11) 5_556 7_556 ?
Fe3 Al15 Fe4 108.72(10) 1_554 7_556 ?
Fe3 Al15 Fe4 108.72(10) 5_556 3_454 ?
Fe3 Al15 Fe4 173.09(11) 1_554 3_454 ?
Fe4 Al15 Fe4 71.7(2) 7_556 3_454 ?
Fe3 Al15 Al10 114.2(3) 5_556 . ?
Fe3 Al15 Al10 55.88(14) 1_554 . ?
Fe4 Al15 Al10 62.26(14) 7_556 . ?
Fe4 Al15 Al10 128.1(3) 3_454 . ?
Fe3 Al15 Al10 55.88(14) 5_556 2 ?
Fe3 Al15 Al10 114.2(3) 1_554 2 ?
Fe4 Al15 Al10 128.1(3) 7_556 2 ?
Fe4 Al15 Al10 62.26(14) 3_454 2 ?
Al10 Al15 Al10 169.3(4) . 2 ?
Fe3 Al15 Al11 128.9(3) 5_556 7 ?
Fe3 Al15 Al11 63.40(14) 1_554 7 ?
Fe4 Al15 Al11 55.16(15) 7_556 7 ?
Fe4 Al15 Al11 113.0(3) 3_454 7 ?
Al10 Al15 Al11 57.28(15) . 7 ?
Al10 Al15 Al11 124.15(15) 2 7 ?
Fe3 Al15 Al11 63.40(14) 5_556 8_455 ?
Fe3 Al15 Al11 128.9(3) 1_554 8_455 ?
Fe4 Al15 Al11 113.0(3) 7_556 8_455 ?
Fe4 Al15 Al11 55.16(15) 3_454 8_455 ?
Al10 Al15 Al11 124.15(15) . 8_455 ?
Al10 Al15 Al11 57.28(15) 2 8_455 ?
Al11 Al15 Al11 167.2(4) 7 8_455 ?
Fe3 Al15 Al6 117.78(17) 5_556 7_556 ?
Fe3 Al15 Al6 132.27(16) 1_554 7_556 ?
Fe4 Al15 Al6 56.6(2) 7_556 7_556 ?
Fe4 Al15 Al6 54.00(19) 3_454 7_556 ?
Al10 Al15 Al6 80.2(2) . 7_556 ?
Al10 Al15 Al6 107.5(2) 2 7_556 ?
Al11 Al15 Al6 110.2(3) 7 7_556 ?
Al11 Al15 Al6 59.9(2) 8_455 7_556 ?
Fe3 Al15 Al6 132.27(16) 5_556 3_454 ?
Fe3 Al15 Al6 117.78(17) 1_554 3_454 ?
Fe4 Al15 Al6 54.00(19) 7_556 3_454 ?
Fe4 Al15 Al6 56.6(2) 3_454 3_454 ?
Al10 Al15 Al6 107.5(2) . 3_454 ?
Al10 Al15 Al6 80.2(2) 2 3_454 ?
Al11 Al15 Al6 59.9(2) 7 3_454 ?
Al11 Al15 Al6 110.2(3) 8_455 3_454 ?
Al6 Al15 Al6 90.7(3) 7_556 3_454 ?
Fe3 Al15 Al1 58.3(2) 5_556 . ?
Fe3 Al15 Al1 53.3(2) 1_554 . ?
Fe4 Al15 Al1 116.10(15) 7_556 . ?
Fe4 Al15 Al1 133.05(17) 3_454 . ?
Al10 Al15 Al1 59.2(2) . . ?
Al10 Al15 Al1 112.5(3) 2 . ?
Al11 Al15 Al1 107.1(2) 7 . ?
Al11 Al15 Al1 82.0(2) 8_455 . ?
Al6 Al15 Al1 90.10(15) 7_556 . ?
Al6 Al15 Al1 166.2(3) 3_454 . ?
Fe3 Al15 Al1 53.3(2) 5_556 5 ?
Fe3 Al15 Al1 58.3(2) 1_554 5 ?
Fe4 Al15 Al1 133.05(17) 7_556 5 ?
Fe4 Al15 Al1 116.10(15) 3_454 5 ?
Al10 Al15 Al1 112.5(3) . 5 ?
Al10 Al15 Al1 59.2(2) 2 5 ?
Al11 Al15 Al1 82.0(2) 7 5 ?
Al11 Al15 Al1 107.1(2) 8_455 5 ?
Al6 Al15 Al1 166.2(3) 7_556 5 ?
Al6 Al15 Al1 90.10(15) 3_454 5 ?
Al1 Al15 Al1 92.3(3) . 5 ?
 
_refine_diff_density_max    1.706
_refine_diff_density_min   -2.043
_refine_diff_density_rms    0.433

_shelx_res_file
;
TITL Al13Fe4_a.res in C2/m
    Al13Fe4_a.res
    created by SHELXL-2019/1 at 16:04:16 on 28-Mar-2024
REM Old TITL Al13Fe4 in C2/m

REM SHELXT solution in C2/m
REM R1 0.168,  Rweak 0.009,  Alpha 0.059,  Orientation as input
REM Formula found by SHELXT:  Al13 Fe4

CELL  0.71073  15.4976   8.0814  12.4878   90.000  107.790   90.000
ZERR   24.000   0.0035   0.0017   0.0032    0.000    0.008    0.000
LATT  7
SYMM -X, Y, -Z
SFAC AL FE
UNIT 78 24
TEMP 27.600
L.S. 10
REM BOND $H
LIST 4
ACTA
FMAP 2
REM SHEL 999 0.84
REM EADP AL1 AL2 AL6 AL15
REM EADP AL2 AL6
EADP AL2 AL3 AL6
ISOR FE2
DELU
PLAN 20
WGHT    0.083400
FVAR       0.11411
FE1   2    0.085529    0.000000    0.382280    10.50000    0.00392    0.00209 =
         0.00645    0.00000    0.00108    0.00000
FE2   2    0.401898    0.000000    0.622820    10.50000    0.00770    0.00180 =
         0.00554    0.00000   -0.00474    0.00000
FE3   2    0.090805    0.000000    0.988455    10.50000    0.00578    0.00393 =
         0.00525    0.00000   -0.00090    0.00000
FE4   2    0.402822    0.000000    0.986289    10.50000    0.00450    0.00228 =
         0.00728    0.00000    0.00198    0.00000
FE5   2    0.320108    0.293264    0.277927    11.00000    0.00634    0.00757 =
         0.00458   -0.00006   -0.00116   -0.00007
AL1   1    0.066999    0.000000    0.173841    10.50000    0.01376    0.01381 =
         0.00401    0.00000   -0.00057    0.00000
AL2   1    0.321260    0.000000    0.281193    10.50000    0.01092    0.00783 =
         0.01003    0.00000   -0.00400    0.00000
AL3   1    0.238110    0.000000    0.533942    10.50000    0.01092    0.00783 =
         0.01003    0.00000   -0.00400    0.00000
AL4   1    0.073418    0.000000    0.580119    10.50000    0.00948    0.01469 =
         0.00746    0.00000    0.00022    0.00000
AL5   1    0.241461    0.000000    0.961350    10.50000    0.00571    0.00387 =
         0.01665    0.00000   -0.00397    0.00000
AL6   1    0.478604    0.000000    0.829668    10.50000    0.01092    0.00783 =
         0.01003    0.00000   -0.00400    0.00000
AL7   1    0.500000    0.000000    0.500000    10.25000    0.01584    0.01128 =
         0.00296    0.00000   -0.00227    0.00000
AL8   1    0.305975    0.000000    0.772938    10.50000    0.01708    0.00542 =
         0.00829    0.00000    0.00090    0.00000
AL9   1    0.086241    0.000000    0.788781    10.50000    0.01095    0.00832 =
         0.00671    0.00000   -0.00222    0.00000
AL10  1    0.185858    0.217166    0.111222    11.00000    0.00802    0.01151 =
         0.00703   -0.00185   -0.00099    0.00173
AL11  1    0.367309    0.211628    0.110089    11.00000    0.00681    0.01203 =
         0.00814   -0.00253   -0.00339    0.00110
AL12  1    0.177239    0.221095    0.334274    11.00000    0.01437    0.01043 =
         0.00728   -0.00103   -0.00163   -0.00354
AL13  1    0.492003    0.232778    0.329617    11.00000    0.01129    0.00865 =
         0.00426   -0.00112    0.00187   -0.00157
AL14  1    0.363551    0.219795    0.478119    11.00000    0.00697    0.01432 =
         0.00902    0.00247   -0.00052    0.00012
AL15  1    0.000000    0.249538    0.000000    10.50000    0.01042    0.00344 =
         0.00607    0.00000   -0.00599    0.00000
HKLF 4


REM  Al13Fe4_a.res in C2/m
REM wR2 = 0.2230, GooF = S = 1.064, Restrained GooF = 1.030 for all data
REM R1 = 0.0803 for 756 Fo > 4sig(Fo) and 0.1721 for all 1423 data
REM 128 parameters refined using 104 restraints

END

WGHT      0.0834      0.0000

REM Highest difference peak  1.706,  deepest hole -2.043,  1-sigma level  0.433
Q1    1   0.4050  0.3072  0.4880  11.00000  0.05    1.71
Q2    1   0.2179  0.0000  1.0358  10.50000  0.05    1.70
Q3    1   0.5423  0.0000  0.8996  10.50000  0.05    1.68
Q4    1   0.5000  0.2354  0.5000  10.50000  0.05    1.68
Q5    1   0.3570  0.0000  1.0453  10.50000  0.05    1.65
Q6    1   0.2817  0.0000  0.2193  10.50000  0.05    1.63
Q7    1   0.5063  0.0000  0.8234  10.50000  0.05    1.60
Q8    1   0.3439  0.0000  0.3337  10.50000  0.05    1.58
Q9    1   0.3598  0.0000  0.4256  10.50000  0.05    1.51
Q10   1   0.0286  0.2216  0.1574  11.00000  0.05    1.44
Q11   1   0.3075  0.1457  0.7231  11.00000  0.05    1.43
Q12   1   0.2790  0.0722  0.7793  11.00000  0.05    1.40
Q13   1   0.4526  0.2558  0.5540  11.00000  0.05    1.39
Q14   1   0.2132  0.0000  0.2421  10.50000  0.05    1.35
Q15   1   0.4597  0.2430  0.4202  11.00000  0.05    1.35
Q16   1   0.5604  0.2386  0.2349  11.00000  0.05    1.35
Q17   1   0.2465  0.2605  0.2187  11.00000  0.05    1.35
Q18   1   0.4149  0.0000  0.5556  10.50000  0.05    1.33
Q19   1   0.3786  0.0000  0.8800  10.50000  0.05    1.33
Q20   1   0.5000  0.0000  1.0000  10.25000  0.05    1.32
;
_shelx_res_checksum    1069

_shelx_hkl_file
;
  -2   0   0    1.20    2.60
  -2   0   0    5.80    4.90
  -2   0   0    4.40    2.00
   2   0   0    1.50    2.70
   2   0   0   -1.90    2.90
   2   0   0    3.40    4.90
   2   0   0   18.30   11.30
   2   0   0   -0.50    3.10
   2   0   0    4.60    2.90
   2   0   0    2.10    3.70
  -2   0   0    3.00    3.70
  -2   0   0    3.70   10.60
  -2   0   0   23.70   24.90
  -2   0   0    1.80    2.30
  -2   0   0    4.30    3.40
   4   0   0  809.42   71.09
   4   0   0  823.22   68.39
   4   0   0  810.52   69.29
   4   0   0  799.92   65.79
   4   0   0  797.52   69.79
   4   0   0  830.42   76.09
   4   0   0  760.22   68.59
  -4   0   0  828.02  118.99
  -4   0   0  810.92   68.89
  -4   0   0  789.82   69.49
  -4   0   0  774.12   86.49
  -4   0   0  800.22   71.19
  -4   0   0  856.61   68.89
  -4   0   0  751.52   71.19
  -6   0   0   30.00   10.50
   6   0   0   29.90   11.00
  -6   0   0   23.60   42.70
   6   0   0   30.60   12.70
   6   0   0   30.10   12.80
   6   0   0   55.39   23.70
  -6   0   0   89.79   99.59
  -6   0   0   23.00    9.40
  -6   0   0   35.00   18.70
   6   0   0   29.80   10.80
   6   0   0   42.40   15.60
  -6   0   0   29.40   11.70
   8   0   0  193.98   46.80
   8   0   0  144.19   21.50
   8   0   0  124.39   28.00
  -8   0   0  109.79  115.39
  -8   0   0  128.39   21.90
  -8   0   0  146.09   25.80
  -8   0   0  110.79   26.00
   8   0   0  118.49   25.20
   8   0   0  141.29   24.60
   8   0   0   86.69   17.40
  -8   0   0  177.38   35.10
   8   0   0  159.98   26.00
   1  -1   0   15.50    4.10
  -1  -1   0   16.00   12.10
  -1  -1   0   33.80   27.60
  -1  -1   0   21.70   18.20
   1  -1   0   10.60    5.60
  -1  -1   0   16.40   13.50
   1  -1   0  -10.00   31.10
   1  -1   0   61.59   38.80
   1  -1   0   12.10    4.10
   1  -1   0   18.00    4.80
   1  -1   0   19.20    7.00
  -1  -1   0   17.90    9.40
   1   1   0    6.00   12.10
  -1   1   0    9.20    4.20
  -1   1   0  -20.00   23.90
   1   1   0   15.70   11.70
   1   1   0   17.50   16.00
  -1   1   0   20.00    6.00
   1   1   0    9.40    9.60
  -1   1   0   33.40   29.80
   1   1   0   16.10   22.80
  -3  -1   0   -5.10   35.40
   3  -1   0   10.30   58.69
   3  -1   0    1.30    5.20
  -3  -1   0    8.40   32.30
  -3  -1   0    1.80    2.70
  -3  -1   0   -2.50    3.00
  -3  -1   0   -1.60   20.10
   3  -1   0   -1.10   10.20
  -3  -1   0    2.20    3.90
  -3  -1   0   -0.20    4.00
  -3  -1   0   -0.10   13.30
  -3  -1   0   -8.10   20.80
   3  -1   0    1.90    5.70
   3  -1   0   -3.70    8.50
  -3  -1   0    2.90    2.60
   3  -1   0    2.40    6.10
   3  -1   0   -4.60    5.30
  -3   1   0   19.30   38.60
   3   1   0  -15.40   19.50
  -3   1   0   14.80    9.70
   3   1   0    2.40    3.20
   3   1   0   -6.90   20.10
  -3   1   0  -52.19   44.20
   3   1   0   34.60   29.20
   3   1   0   -1.00    2.60
  -3   1   0   -2.80   14.50
   3   1   0    8.80   12.10
  -3   1   0   -1.20    4.70
  -3   1   0   -4.60    6.00
   3   1   0    3.40    4.50
  -3   1   0   -1.60    4.40
   5  -1   0   98.39   17.60
  -5  -1   0  111.29   18.70
   5  -1   0   86.09   17.40
   5  -1   0   82.89   19.40
   5  -1   0  117.49   18.50
   5  -1   0  103.29   22.80
  -5  -1   0   86.99   13.60
  -5  -1   0  138.79   52.59
   5  -1   0   83.09   17.00
   5  -1   0  183.58  112.09
  -5  -1   0   97.59   17.00
  -5  -1   0   86.19   60.69
  -5  -1   0   78.49   13.60
  -5  -1   0  109.19   25.80
  -5  -1   0   78.29   13.80
   5   1   0  126.19   71.69
  -5   1   0  109.19   22.40
  -5   1   0  103.09   20.10
   5   1   0  123.59   46.80
  -5   1   0   94.89   18.60
  -5   1   0   90.29   35.70
   5   1   0   83.79   13.30
  -5   1   0   50.79   23.40
   5   1   0   87.49   11.30
   5   1   0   90.29   14.50
  -5   1   0  215.58   63.39
   5   1   0   52.39   22.50
  -5   1   0   48.70   82.19
   5   1   0  102.79   16.00
   5   1   0  146.59   38.00
  -5   1   0   85.59   16.60
   7  -1   0  681.43   60.79
   7  -1   0  670.53   63.69
  -7  -1   0  607.94   60.59
   7  -1   0  872.31   80.79
   7  -1   0  746.93  205.38
  -7  -1   0  712.13   85.99
  -7  -1   0  778.92   66.59
   7  -1   0  642.84   63.79
  -7  -1   0  649.83   71.99
  -7  -1   0  664.63   59.69
   7  -1   0  646.74   66.39
   7  -1   0  656.43   62.69
   7  -1   0  640.84   69.99
  -7  -1   0  639.64   59.59
  -7  -1   0 1186.98  199.38
  -7   1   0  620.84   65.09
   7   1   0  672.13   61.79
   7   1   0  625.34   57.19
  -7   1   0  928.11  217.18
   7   1   0  575.04   77.59
  -7   1   0  552.44   67.59
  -7   1   0  611.24   61.69
   7   1   0  669.03   60.79
   7   1   0  642.24   89.19
   7   1   0  612.84   60.69
   7   1   0  621.34  152.48
  -7   1   0  678.93   99.99
  -7   1   0  561.54   68.49
   9  -1   0  295.27  179.98
   9  -1   0  204.38   33.40
  -9  -1   0   48.00  139.19
   9  -1   0  202.78   34.70
  -9  -1   0  153.08   26.60
  -9  -1   0  205.18   35.80
  -9  -1   0  195.78   36.70
   9  -1   0  154.68   36.90
   9  -1   0  141.69   30.80
  -9  -1   0  172.68   28.30
  -9  -1   0  182.98   92.49
   9  -1   0  179.68   30.40
   9  -1   0  202.28   32.00
   9  -1   0  184.98   55.19
  -9   1   0  171.18   40.70
   9   1   0  158.78   27.70
   9   1   0  168.58   53.59
   9   1   0  174.38   30.50
   9   1   0  231.18   60.79
   9   1   0  157.08   29.10
  -9   1   0  145.59   95.29
  -9   1   0  156.98   29.50
  -9   1   0  172.58   32.90
   9   1   0  157.68   27.00
   9   1   0   62.79  122.79
  -9   1   0  159.68   38.70
  -9   1   0  276.37   97.29
   9   1   0  158.48   24.20
  -9   1   0  170.98   31.10
  -9   1   0  322.47  171.98
   0  -2   0  250.17   21.30
   0   2   0  250.67   21.20
  -2   2   0  634.24   52.59
   4  -2   0   45.00   87.39
  -4  -2   0   69.09    9.80
  -4  -2   0   59.59   12.40
  -4  -2   0   64.49    9.30
   4  -2   0   74.89   23.70
   4  -2   0   58.79   14.00
  -4  -2   0  109.79   29.90
  -4  -2   0   83.39   41.20
  -4  -2   0  128.29   41.20
  -4  -2   0  129.99   73.59
   4  -2   0   91.89   22.60
  -4  -2   0   86.89   32.80
   4  -2   0   87.99   16.00
   4  -2   0  192.38   86.39
  -4   2   0   78.59   15.10
   4   2   0   70.79   44.20
   4   2   0   43.80   24.60
   4   2   0   88.59   37.00
  -4   2   0   97.29   19.90
  -4   2   0   83.19   21.20
  -4   2   0   24.80   78.79
   4   2   0   21.80   36.50
  -4   2   0  111.19   27.00
  -4   2   0   72.99   15.80
  -4   2   0  147.99   77.59
  -6  -2   0 6117.49  492.35
  -6  -2   0 5922.71  519.05
  -6  -2   0 6850.21  495.05
   6  -2   0 6080.09  480.05
  -6  -2   0 6168.98  472.85
  -6  -2   0 5727.63  474.55
   6  -2   0 6172.38  478.95
   6  -2   0 5719.73  581.34
   6  -2   0 5873.41  484.85
  -6  -2   0 5744.23  473.55
  -6  -2   0 5829.12  473.15
  -6  -2   0 5988.80  473.35
   6  -2   0 6125.89  478.85
   6  -2   0 6364.96  479.65
   6  -2   0 5874.01  491.85
   6   2   0 5769.82  472.25
  -6   2   0 5788.92  478.25
   6   2   0 5989.20  510.25
  -6   2   0 6037.20  480.65
  -6   2   0 5471.55  517.65
   6   2   0 5040.10  492.95
  -6   2   0 5225.18  488.05
  -6   2   0 5443.76  565.74
  -6   2   0 5729.33  490.65
   6   2   0 5889.51  472.25
   6   2   0 5294.47  507.95
  -6   2   0 5679.33  482.55
   6   2   0 5869.81  476.55
   6   2   0 5626.14  491.15
   8  -2   0   15.90   16.10
   8  -2   0   43.30   27.30
   8  -2   0  -21.10   15.00
  -8  -2   0   -6.00    8.20
  -8  -2   0    6.10    9.90
   8  -2   0    2.60   14.60
  -8  -2   0   -8.30   14.20
  -8  -2   0   50.79   43.10
  -8  -2   0   10.90    9.90
   8  -2   0  -10.10   26.60
  -8  -2   0   33.10   94.69
   8  -2   0  107.69  173.38
  -8  -2   0   26.40   68.99
   8  -2   0   -7.50   16.70
  -8   2   0    3.30   16.20
   8   2   0  -46.50   92.49
   8   2   0  -31.20   49.90
  -8   2   0   20.80   19.80
  -8   2   0  -91.39  162.08
  -8   2   0   56.59  128.59
   8   2   0   14.20   35.20
  -8   2   0   58.39   57.09
   8   2   0    4.40   13.10
  -8   2   0   16.00   13.70
   8   2   0    6.10    8.90
  -8   2   0   31.80   25.70
   8   2   0   -0.40    7.90
   1  -3   0    6.70    3.40
  -1  -3   0    3.80    4.20
  -1   3   0    7.30    3.30
  -3  -3   0  458.15   38.50
  -3   3   0  400.46   37.70
  -5  -3   0  712.33  172.28
   5  -3   0  987.00  105.39
  -5  -3   0 1088.49  118.69
   5  -3   0 1292.47  191.58
   5  -3   0 1008.70   93.69
  -5  -3   0 1035.70  111.39
   5  -3   0 1086.49   97.09
  -5  -3   0 1090.69   83.79
   5  -3   0 1035.40   92.99
  -5  -3   0 1015.60   91.59
  -5  -3   0 1083.39  126.49
   5  -3   0 1023.20  101.79
   5  -3   0  797.02  221.98
   5  -3   0 1041.00   92.59
  -5   3   0 1061.19   99.09
   5   3   0 1022.70  130.89
   5   3   0  819.82  118.39
  -5   3   0 1065.99   96.19
  -5   3   0 1010.20   94.29
  -5   3   0  984.10  219.28
  -5   3   0 1032.20  172.38
  -5   3   0 1005.10   97.29
   5   3   0 1012.70  109.69
  -5   3   0  977.30   92.49
   7  -3   0   72.19   22.10
  -7  -3   0   56.99   10.90
   7  -3   0   50.49   22.30
   7  -3   0   90.99   33.60
  -7  -3   0  -22.90   61.99
  -7  -3   0   59.19   12.20
  -7  -3   0   58.09   10.80
  -7  -3   0   67.79   14.00
  -7  -3   0   72.09   18.40
  -7  -3   0   33.40  118.69
   7  -3   0   59.39   19.50
   7  -3   0   36.30   19.00
  -7  -3   0   64.39   41.00
  -7  -3   0   51.49   16.80
  -7  -3   0   95.99   59.89
  -7  -3   0  177.38   64.69
   7  -3   0   20.10   26.80
   7  -3   0  -76.49  180.18
   7   3   0   44.00   36.40
  -7   3   0   84.69   28.30
  -7   3   0   76.09   19.50
   7   3   0   72.89   73.29
  -7   3   0  137.89   50.99
   7   3   0   43.90   66.89
   7   3   0  112.19   63.59
  -7   3   0  143.09  162.28
   7   3   0   93.39   43.30
  -7   3   0   85.79  120.89
  -7   3   0   38.50   18.30
  -7   3   0   65.29   41.90
   0  -4   0 9999.00  802.32
  -2  -4   0   93.49   12.70
  -4  -4   0  230.78   25.50
  -4   4   0  235.08   25.90
   6  -4   0   35.70   34.60
  -6  -4   0   48.40   59.29
   6  -4   0   69.29   20.70
  -6  -4   0   54.99   18.20
  -6  -4   0   58.29   21.10
   6  -4   0   67.79   33.90
  -6  -4   0   56.39   51.69
   6  -4   0   58.79   21.90
   6  -4   0   39.50   25.00
   6  -4   0  109.89  163.48
  -6  -4   0   20.40   68.89
   6  -4   0   85.89   23.00
   6  -4   0   65.69  205.58
  -6  -4   0  151.48   82.59
  -6  -4   0   67.29  163.88
  -6   4   0   76.19  198.68
  -6   4   0   86.69   30.30
  -6   4   0   52.09   19.70
   6   4   0   69.39   45.40
   6   4   0   44.30   72.39
  -6   4   0  108.69  145.59
  -6   4   0   68.19   28.20
  -6   4   0   96.99   33.10
  -6   4   0   46.40   23.00
   6   4   0  106.19   66.39
  -1  -5   0    1.30    6.60
  -3  -5   0  185.18   23.80
  -3   5   0  175.08   18.80
  -5  -5   0   72.19   15.60
  -5   5   0  106.09   17.40
  -7  -5   0  835.92   76.49
  -7   5   0  856.71   77.29
  -9  -5   0  485.15   53.59
  -9   5   0  481.45   54.39
 -11  -5   0  343.07   50.09
 -13  -5   0   65.49   31.20
 -15  -5   0  120.59   43.50
   0  -6   0 1317.87  107.59
  -2  -6   0   12.10   10.70
  -4  -6   0  192.28   25.00
  -4   6   0  186.78   21.00
  -6   6   0 1335.97  113.09
  -8  -6   0   94.19   23.70
  -8   6   0    9.90   45.10
 -10  -6   0  215.38   35.20
 -10   6   0  231.98   40.00
 -12  -6   0  221.38   41.10
 -12   6   0  332.97   49.80
 -14  -6   0   14.40   35.60
 -14   6   0   60.89   59.69
  -1  -7   0    2.70    8.60
  -3  -7   0  333.07   36.90
  -5  -7   0  628.74   60.19
  -5   7   0  646.34   54.19
  -7  -7   0  -17.90   18.10
  -7   7   0   -0.90   15.70
  -9  -7   0  147.79   29.20
  -9   7   0  139.59   30.80
 -11  -7   0  477.05   64.89
 -11   7   0  558.44   68.39
 -13  -7   0  606.54   78.59
  -2  -8   0  220.78   25.10
  -4  -8   0   -3.80   17.60
  -6  -8   0  409.06   48.80
  -8  -8   0   57.59   26.00
  -8   8   0   10.30   18.30
 -10  -8   0  263.37   46.30
  -5  -9   0  -36.20   24.50
  -7  -9   0  436.96   62.39
  -9  -9   0  151.58   39.40
  10   0  -1   42.80   18.20
  10   0  -1   28.70   21.50
  10   0  -1   28.70   16.60
 -10   0   1  147.79  185.68
  10   0  -1   83.79   45.50
  10   0  -1   45.90   18.00
  10   0  -1   40.10   26.70
 -10   0   1   47.40   18.50
 -10   0   1   47.20   20.50
  10   0  -1   19.80   36.60
 -10   0   1   54.49   25.80
 -10   0   1   51.89   32.70
 -10   0   1   20.70   76.59
 -10   0   1   35.20   19.80
  -8   0   1  188.28   33.50
  -8   0   1  132.29   23.30
   8   0  -1  129.89   26.50
  -8   0   1  175.68   28.10
  -8   0   1  155.38   69.69
   8   0  -1  139.69   28.20
   8   0  -1  166.58   64.69
   8   0  -1  139.09   24.60
   8   0  -1  131.59   38.80
   8   0  -1  152.08   24.40
  -8   0   1  186.38  122.69
  -8   0   1  173.08   27.30
   8   0  -1  167.08   25.30
  -8   0   1  174.68   33.60
   6   0  -1   20.70   10.90
  -6   0   1   40.60   16.20
  -6   0   1   36.60   16.60
  -6   0   1   27.80   39.40
   6   0  -1   61.79   24.40
   6   0  -1   41.70   14.70
  -6   0   1   28.90   11.20
   6   0  -1   33.80   11.10
   6   0  -1   26.90   35.10
  -6   0   1   28.40   11.40
  -6   0   1   21.80   77.19
   6   0  -1   41.30   13.30
   6   0  -1   38.10    7.20
  -6   0   1   29.40   10.70
   4   0  -1  287.37   26.70
   4   0  -1  256.37   27.60
   4   0  -1  256.97   25.90
   4   0  -1  286.37   29.60
  -4   0   1  285.37   30.20
  -4   0   1  294.97   97.99
  -4   0   1  254.87   26.20
  -4   0   1  261.57   27.30
  -4   0   1  262.17   26.60
  -4   0   1  284.77   48.30
   4   0  -1  244.08   46.50
  -2   0   1    2.80    3.60
   2   0  -1    2.40    4.40
  -2   0   1   -0.10    2.70
  -2   0   1    0.60    4.30
  -2   0   1   18.00   29.60
  -2   0   1   -1.10    4.80
  -2   0   1   18.80   13.60
   2   0  -1   -2.90    2.50
   2   0  -1   -0.60    2.60
   2   0  -1    1.40    3.30
   2   0  -1   13.10   14.00
   2   0  -1    0.70    3.30
  -2   0   1    1.90    2.60
  -2   0  -1   31.10    8.20
  -2   0  -1   35.20   11.20
  -2   0  -1   35.90    7.50
   2   0   1   22.70    5.70
   2   0   1   36.20   11.50
   2   0   1   19.30    5.40
  -2   0  -1   23.70    5.70
   2   0   1   22.20    7.50
   2   0   1   50.69   25.10
  -2   0  -1   27.40    6.60
   2   0   1   22.30    5.90
   2   0   1   23.20    5.70
   2   0   1   27.70    6.40
   4   0   1  317.47   34.70
   4   0   1  279.07   28.80
   4   0   1  289.87   29.30
  -4   0  -1  269.87   31.40
  -4   0  -1  304.67   29.60
   4   0   1  217.78   41.40
   4   0   1  322.67   30.20
  -4   0  -1  301.97   33.60
  -4   0  -1  322.97   39.10
   4   0   1  324.57   31.00
  -4   0  -1  312.77   31.20
  -4   0  -1  299.07   28.00
   4   0   1  292.27   30.30
   6   0   1  110.09   17.20
  -6   0  -1  109.59   18.70
   6   0   1  110.99   17.90
  -6   0  -1   97.99   16.30
   6   0   1  128.89   20.40
  -6   0  -1  127.99   25.70
  -6   0  -1  136.09   59.09
  -6   0  -1   96.29   22.40
   6   0   1  110.09   35.10
   6   0   1   95.39   18.90
  -6   0  -1  119.79   21.10
   6   0   1  127.39   25.50
   6   0   1  115.89   21.00
  -6   0  -1  126.99   20.00
   8   0   1  200.88   31.00
   8   0   1  283.47   57.49
   8   0   1  234.18   30.60
  -8   0  -1  189.88   24.40
  -8   0  -1  212.18   30.30
   8   0   1  183.78   31.20
   8   0   1  165.68   32.10
  -8   0  -1  202.48   34.80
  -8   0  -1  173.48   33.20
  -8   0  -1  195.78   31.60
  -8   0  -1  297.77   90.49
  -8   0  -1  198.38   28.80
   8   0   1  158.68   28.20
   8   0   1  180.38   26.80
   9  -1  -1   13.30   14.90
   9  -1  -1   13.20   17.90
   9  -1  -1   39.50   15.80
   9  -1  -1   25.60   21.60
   9  -1  -1   13.90   37.70
  -9  -1   1   -3.10   69.09
   9  -1  -1   14.60   15.80
  -9  -1   1    0.30   13.80
  -9  -1   1   29.00   12.80
   9  -1  -1    8.70   24.10
  -9  -1   1   27.10   19.70
  -9  -1   1  -90.89  118.09
  -9  -1   1   34.20   22.60
  -9  -1   1   11.10   12.80
   9  -1  -1 -227.08  157.88
   9   1  -1   41.00   17.70
  -9   1   1   33.70   66.19
  -9   1   1   16.90   22.10
   9   1  -1   21.10   16.50
  -9   1   1   34.40   19.20
   9   1  -1   21.90   52.79
   9   1  -1   58.49   34.00
  -9   1   1   11.20   14.30
   9   1  -1   73.19  110.59
   9   1  -1    3.80   60.99
   9   1  -1   26.00   11.00
  -9   1   1  -44.00  135.09
  -9   1   1   47.70   30.10
   9   1  -1   17.20   12.10
  -9   1   1   19.00   18.80
   7  -1  -1   61.79   17.30
   7  -1  -1   54.39   15.30
   7  -1  -1  215.48  140.99
   7  -1  -1   98.79   46.30
   7  -1  -1   48.90   19.30
   7  -1  -1   84.79   24.20
   7  -1  -1   47.00   14.60
   7  -1  -1   49.00   16.00
   7   1  -1  108.89   89.99
  -7   1   1   89.39   49.00
  -7   1   1   54.69   18.20
  -7   1   1   54.49   24.80
  -7   1   1   61.39   16.40
  -7   1   1   31.90   18.90
  -7   1   1   70.39  102.09
  -7   1   1   30.30   13.40
   7   1  -1  184.48   57.49
  -5  -1   1    6.90    6.80
  -5  -1   1   22.70   55.09
   5  -1  -1   22.50   13.40
   5  -1  -1    0.70    7.70
   5  -1  -1    3.20    7.50
  -5  -1   1    8.60    4.30
  -5  -1   1  -21.60   34.30
  -5  -1   1    3.90    6.40
  -5  -1   1   15.20   22.80
   5  -1  -1   12.40   22.70
  -5  -1   1   -7.70    8.40
  -5  -1   1   -1.20    8.60
   5  -1  -1    5.50   11.70
  -5  -1   1   14.10   16.00
  -5  -1   1    6.50    5.20
   5  -1  -1    6.30    9.90
   5  -1  -1   -2.90   64.19
  -5   1   1    3.10    9.00
  -5   1   1   14.90   85.69
   5   1  -1   16.20    8.70
   5   1  -1   18.00   37.20
   5   1  -1  -10.50   54.59
   5   1  -1    8.00    4.50
  -5   1   1   13.70   26.40
  -5   1   1    7.40   14.30
  -5   1   1    3.20    8.10
   5   1  -1   15.40   15.90
  -5   1   1    1.30    9.80
   5   1  -1  -12.80   23.70
  -5   1   1    9.80   16.50
   5   1  -1    4.50    6.10
   5   1  -1    0.20    6.50
   5   1  -1    7.90    5.90
  -3  -1   1    4.60    3.90
  -3  -1   1   -0.60    3.90
   3  -1  -1    7.40    6.40
  -3  -1   1    2.40    3.50
   3  -1  -1    0.00    5.10
   3  -1  -1   -4.80    4.90
  -3  -1   1    1.90    3.80
  -3  -1   1   -0.80   14.90
  -3  -1   1    2.80    5.00
   3  -1  -1  -12.00    7.40
   3  -1  -1    0.00    8.10
  -3  -1   1   15.30   26.00
   3  -1  -1   45.00   53.69
  -3  -1   1    8.10   17.10
   3  -1  -1   -0.70   13.40
  -3  -1   1    2.70    3.00
  -3  -1   1    2.50    9.60
  -3  -1   1  -25.00   30.40
  -3   1   1    4.40    5.70
  -3   1   1   -2.50    8.70
   3   1  -1    1.60    2.10
   3   1  -1   -3.00    3.90
   3   1  -1   21.40   23.40
   3   1  -1    4.90    5.80
  -3   1   1    2.30    6.90
  -3   1   1    6.60    9.50
   3   1  -1   -0.90    3.00
   3   1  -1   -9.60    9.40
   3   1  -1    4.10    4.50
  -3   1   1   -1.90    5.30
  -3   1   1  -27.10   49.60
   3   1  -1  -15.50   30.30
   3   1  -1    1.20    2.40
   3   1  -1    6.60   16.80
  -3   1   1    6.70   16.10
   1  -1  -1   60.39    6.90
  -1   1   1   59.69    7.10
  -1  -1  -1   61.59    7.60
   1   1   1   46.30    6.90
  -1   1  -1   52.19    5.90
  -3  -1  -1    8.90    4.90
  -3  -1  -1    8.50   25.90
  -3  -1  -1   25.20    6.90
   3  -1   1   19.60   42.10
   3  -1   1   -5.60    6.30
   3  -1   1  -87.39   50.59
  -3  -1  -1   20.10    5.60
  -3  -1  -1    6.30   16.30
   3  -1   1    2.40    7.00
  -3  -1  -1    9.20    4.60
   3  -1   1    4.50    7.30
   3  -1   1    6.60   10.30
   3  -1   1   -4.10    6.10
  -3  -1  -1    6.40   37.00
   3   1   1   10.70    4.60
   3   1   1   14.30    4.40
  -3   1  -1    3.90    9.50
   3   1   1   34.10   47.90
  -3   1  -1    2.90   27.30
  -3   1  -1   -3.10    6.00
   3   1   1   14.80   24.40
  -3   1  -1   -2.60    6.80
   3   1   1    8.90   27.90
   3   1   1   16.50    4.70
  -3   1  -1    6.90    6.70
  -3   1  -1    2.10    7.20
   3   1   1   -3.50   16.30
  -5  -1  -1   37.70   12.30
   5  -1   1    7.50   14.30
   5  -1   1   27.10   11.60
  -5  -1  -1   15.90    7.10
   5  -1   1   13.50   18.20
  -5  -1  -1   15.20    9.40
   5  -1   1  113.29  103.19
  -5  -1  -1   15.90   11.00
   5  -1   1   17.00   11.20
   5  -1   1   25.40   13.60
   5  -1   1   24.80   11.40
  -5  -1  -1   20.20    8.20
  -5  -1  -1   59.79   45.90
   5  -1   1   19.30   21.60
  -5  -1  -1   28.70   21.80
  -5  -1  -1   10.00    7.00
  -5  -1  -1    8.60   44.90
  -5   1  -1   21.20   15.80
  -5   1  -1   -8.50   39.00
   5   1   1   16.70    6.90
  -5   1  -1   38.40   97.59
   5   1   1   -4.20   44.00
  -5   1  -1   13.50   10.40
  -5   1  -1    9.90   10.90
   5   1   1   19.20    7.50
   5   1   1   10.70    7.10
   5   1   1   25.20    8.60
   5   1   1   57.49   68.79
  -5   1  -1   15.20   11.20
   5   1   1   19.50   20.20
   5   1   1   19.50    8.10
  -5   1  -1   17.80   11.30
   7  -1   1   24.10   13.50
   7  -1   1   -0.60   19.50
  -7  -1  -1   10.10   12.90
  -7  -1  -1    3.00    6.30
   7  -1   1  -42.90  127.39
  -7  -1  -1   50.79   52.89
   7  -1   1    1.90   12.00
  -7  -1  -1   19.00   55.39
  -7  -1  -1    5.80    8.80
  -7  -1  -1   -3.70   15.30
  -7  -1  -1    8.30   10.10
  -7  -1  -1    8.90   28.70
   7  -1   1   -5.00   17.70
   7  -1   1  -14.00   12.80
  -7  -1  -1    2.20    9.80
   7  -1   1   -4.40   24.30
  -7   1  -1   -3.20   11.10
  -7   1  -1   17.90   51.39
   7   1   1    0.80   11.10
   7   1   1  -10.70    9.50
   7   1   1    8.30   28.30
   7   1   1  -46.70   63.89
   7   1   1   -3.80    8.50
   7   1   1   -7.20    8.30
  -7   1  -1   63.99  137.89
   7   1   1  -53.09   39.50
  -7   1  -1  -10.50   13.00
  -7   1  -1    9.90   13.50
   7   1   1    5.50    8.30
  -7   1  -1    7.30   18.40
  -7   1  -1   13.20   14.90
   7   1   1  -35.60  109.19
  -7   1  -1   16.20   49.90
  -9  -1  -1  -18.50   70.19
   9  -1   1    0.60   18.10
  -9  -1  -1    1.10   14.60
  -9  -1  -1    1.60   13.90
  -9  -1  -1    1.00   20.10
   9  -1   1   -0.40   16.30
  -9  -1  -1   -3.00   13.10
  -9  -1  -1    9.00   17.50
   9  -1   1   16.00  185.38
   9  -1   1   32.90   42.10
   9  -1   1   17.00   14.70
  -9  -1  -1   24.30   80.19
  -9  -1  -1   17.10   38.90
   9  -1   1   13.30   24.20
   9  -1   1   -3.00   19.70
   9  -1   1    8.00   25.70
   9   1   1   -6.70   14.40
   9   1   1    4.10   11.80
   9   1   1   36.60   91.99
   9   1   1   16.40   17.30
  -9   1  -1   -4.90   15.60
   9   1   1    4.60   14.20
  -9   1  -1   60.49   60.89
   9   1   1 -107.49  139.89
  -9   1  -1    5.00   15.10
   9   1   1   16.30   42.90
  -9   1  -1    6.70   21.90
  -9   1  -1   11.90   19.50
   9   1   1    3.60   49.99
  -9   1  -1   27.40  154.88
   9   1   1   -8.00   12.90
  -9   1  -1   45.80   75.19
  -8  -2   1   43.10   34.10
  -8  -2   1   14.40   96.69
  -8  -2   1    2.30   14.00
   8  -2  -1   21.20   15.20
   8  -2  -1  -60.79  139.09
   8  -2  -1    7.70   18.20
  -8  -2   1    5.90    7.50
   8  -2  -1    4.30   18.20
  -8  -2   1    3.20    9.50
  -8  -2   1  -57.29   59.09
  -8  -2   1   26.40   17.80
   8  -2  -1   -1.20   22.70
  -8  -2   1    6.90    9.50
   8  -2  -1   29.40   22.70
  -8  -2   1   37.10   46.20
  -8   2   1   51.19  111.89
   8   2  -1    1.40   51.29
  -8   2   1    9.10   13.50
   8   2  -1   39.00   89.99
  -8   2   1    2.80   49.00
   8   2  -1   10.50    9.70
   8   2  -1   -7.80    8.30
  -8   2   1   22.80   18.80
  -8   2   1  -12.50   21.60
  -8   2   1  -11.60   21.70
   8   2  -1  -10.40   12.70
  -8   2   1   14.00   16.20
  -8   2   1  -68.79  137.29
   8   2  -1   10.50   28.50
   8   2  -1   -0.90   50.59
   6  -2  -1   65.69  113.09
  -6  -2   1    6.60    6.70
   6  -2  -1    6.40   13.40
  -6  -2   1   16.10   41.40
   6  -2  -1   10.60   11.20
  -6  -2   1    7.20    6.00
  -6  -2   1   21.00    8.80
  -6  -2   1   12.30   47.70
  -6  -2   1   55.89   67.59
  -6  -2   1   31.40   26.50
  -6  -2   1   16.00    7.90
   6  -2  -1    5.70   10.30
  -6  -2   1   17.60    7.60
   6  -2  -1    7.30   18.40
  -6  -2   1   40.80   38.90
   6  -2  -1   14.20   18.10
   6  -2  -1    1.80   20.00
  -6  -2   1   13.60   10.30
  -6   2   1   16.80   14.00
   6   2  -1    7.90   11.00
   6   2  -1   15.20    6.70
   6   2  -1    5.10   41.80
  -6   2   1   12.90   33.70
   6   2  -1   13.00   23.80
  -6   2   1    6.00   18.90
  -6   2   1    0.50   99.29
   6   2  -1   71.69   63.39
  -6   2   1   71.29  106.29
   6   2  -1   -1.60   41.60
  -6   2   1   10.90   11.40
  -6   2   1  -12.40   11.40
  -6   2   1   11.20   17.40
   6   2  -1   20.30    6.40
  -4  -2   1   17.10   18.30
  -4  -2   1   -1.30    4.00
  -4  -2   1   -6.00   25.40
  -4  -2   1    4.00    3.20
   4  -2  -1   -3.30    8.90
   4  -2  -1   -5.60   13.30
  -4  -2   1   -0.10    6.80
  -4  -2   1   -0.70    2.60
   4  -2  -1  -71.79   67.19
  -4  -2   1    0.80    3.90
  -4  -2   1   -1.00    7.10
  -4  -2   1   42.40   37.60
  -4  -2   1    3.90   38.00
   4  -2  -1  -10.10    7.10
   4  -2  -1    1.70   15.30
  -4  -2   1  -13.10   59.09
  -4  -2   1   32.00   38.90
   4   2  -1    1.00    3.70
  -4   2   1   -6.20   82.19
  -4   2   1    6.20    8.90
   4   2  -1   -1.40   34.80
  -4   2   1   -0.30    9.90
  -4   2   1   30.60   78.29
  -4   2   1    4.90   13.90
   4   2  -1   -1.70   38.40
   4   2  -1   11.40   21.60
  -4   2   1   -8.70    6.90
   4   2  -1    2.50    3.30
   4   2  -1   34.20   35.70
  -4   2   1   -1.70   18.80
   2  -2  -1  455.75   38.90
  -2   2   1  453.55   39.00
   0  -2  -1   55.59    7.90
   0   2   1   57.09    8.00
  -2  -2  -1  435.56   38.30
   4  -2   1  179.98   25.30
  -4  -2  -1  189.78   82.59
   4  -2   1  368.46  106.29
   4  -2   1  205.58  112.79
   4  -2   1  188.98   28.10
  -4  -2  -1  248.28   47.80
  -4  -2  -1  184.68   54.99
  -4  -2  -1  162.68   19.00
  -4  -2  -1  191.48   19.00
   4  -2   1  190.58   32.00
  -4  -2  -1  173.68   56.69
   4  -2   1  170.08   28.70
  -4  -2  -1  179.98   18.00
   4  -2   1  175.08   24.40
  -4  -2  -1  189.18   18.30
  -4  -2  -1  224.38   46.90
  -4  -2  -1  161.18   20.30
   4   2   1  134.69   63.29
   4   2   1  183.58   17.10
   4   2   1  187.28   17.30
   4   2   1  237.18   47.10
   4   2   1  251.87   67.99
  -4   2  -1  185.38   24.00
  -4   2  -1  229.58   75.79
  -4   2  -1  193.78   25.90
   4   2   1  151.88   38.30
  -4   2  -1  204.98  118.29
  -4   2  -1  223.98   32.90
   4   2   1  164.68   58.69
  -4   2  -1  135.09   28.80
  -4   2  -1  189.88   25.30
   6  -2   1    0.90   14.20
  -6  -2  -1   18.10   13.70
  -6  -2  -1    7.30    7.40
  -6  -2  -1   -3.30    6.90
  -6  -2  -1   18.60   35.20
   6  -2   1    6.20   12.80
  -6  -2  -1   21.30   57.59
  -6  -2  -1  -41.80   79.99
  -6  -2  -1  -75.59   47.10
  -6  -2  -1    6.30    7.50
   6  -2   1   16.40   15.90
  -6  -2  -1    4.50    8.60
   6  -2   1    3.00   23.00
   6  -2   1    9.30   19.90
   6  -2   1  -81.19  127.79
   6  -2   1    1.40   17.30
  -6   2  -1   10.30   18.00
   6   2   1   20.00   43.50
   6   2   1   15.40   31.00
  -6   2  -1   22.80   16.10
   6   2   1  -51.79   44.50
  -6   2  -1  -46.90   65.09
   6   2   1   11.40    6.40
   6   2   1  -50.39   78.09
  -6   2  -1   -4.10   11.60
  -6   2  -1  -11.60   16.30
  -6   2  -1   81.29  114.69
  -6   2  -1    8.90   12.40
   6   2   1    5.00    9.40
   6   2   1    4.30    6.50
  -8  -2  -1  -39.40   92.49
   8  -2   1   30.50   27.10
  -8  -2  -1   10.20   14.70
   8  -2   1   24.10   26.00
  -8  -2  -1    8.50   10.80
   8  -2   1  -16.80   35.30
   8  -2   1   74.99  214.88
   8  -2   1   15.90   19.00
   8  -2   1  -23.50   17.60
   8  -2   1  -13.80   16.20
  -8  -2  -1   94.39   79.19
  -8  -2  -1   24.90   42.70
   8  -2   1   16.20   19.80
  -8  -2  -1    7.20   15.00
  -8  -2  -1   10.90   11.20
  -8  -2  -1    9.30   16.70
  -8  -2  -1    8.60   10.40
   8   2   1    3.30   11.50
  -8   2  -1    5.40   23.60
  -8   2  -1   44.50   62.79
   8   2   1   46.50   40.10
  -8   2  -1  110.79  197.08
   8   2   1   86.39   66.59
   8   2   1   -3.00  108.99
  -8   2  -1  -37.20   80.39
  -8   2  -1   19.50   17.20
   8   2   1   -1.70    9.30
  -8   2  -1   12.70   19.70
   8   2   1   31.30   70.49
  -8   2  -1   20.00   14.30
   8   2   1    8.60    9.20
  -7  -3   1  190.08   83.59
   7  -3  -1  200.48   33.90
   7  -3  -1  187.48   44.10
   7  -3  -1  241.38   39.30
  -7  -3   1  243.98   31.90
  -7  -3   1  260.77   57.29
   7  -3  -1  163.58   29.50
  -7  -3   1  267.57   88.29
  -7  -3   1  190.08   20.00
  -7  -3   1  243.28   72.99
  -7  -3   1  195.78   28.80
  -7  -3   1  161.58   22.00
  -7  -3   1  138.89   64.19
  -7  -3   1  171.28   20.30
   7  -3  -1  200.98   35.30
  -7  -3   1  336.57  240.68
   7  -3  -1  158.08   37.10
   7  -3  -1  420.66  206.28
  -7   3   1  172.58   29.30
  -7   3   1  209.78  170.28
  -7   3   1  231.58   42.90
  -7   3   1  347.97  169.58
   7   3  -1  242.08   78.99
  -7   3   1  191.28   32.00
   7   3  -1  158.28   16.20
  -7   3   1  289.27   58.79
   7   3  -1  140.69   63.09
   7   3  -1  144.59   47.20
   7   3  -1  187.68   76.49
  -5   3   1   19.10   10.40
  -3   3   1   95.89   12.90
  -1  -3   1   23.30    4.60
   1  -3  -1   43.30    6.80
  -1   3   1   40.00    6.50
  -1  -3  -1    3.70    5.00
   1   3   1   -6.20    4.90
  -3  -3  -1   23.10    8.80
  -5  -3  -1    4.90    9.00
  -7  -3  -1   11.50   56.89
   7  -3   1   80.79   24.40
  -7  -3  -1   66.99   67.49
  -7  -3  -1   89.09   46.30
  -7  -3  -1   71.79   17.80
  -7  -3  -1   52.39  134.99
  -7  -3  -1   92.89   75.49
  -7  -3  -1   73.09   13.10
  -7  -3  -1   66.69   13.50
   7  -3   1   29.10  193.88
   7  -3   1  100.39   25.40
   7  -3   1  111.79   31.00
   7  -3   1   63.69   32.70
  -7  -3  -1   80.09   13.50
   7  -3   1   83.99   26.20
   7  -3   1   74.59   32.40
  -7  -3  -1   87.69   18.60
  -7   3  -1   84.29   58.29
  -7   3  -1   84.49   23.30
  -7   3  -1   54.89   24.40
  -7   3  -1   78.59   22.80
   7   3   1  107.39   53.39
  -7   3  -1  109.89  112.69
   7   3   1   89.69   47.60
   7   3   1   74.59   10.40
   7   3   1  120.19   73.69
  -7   3  -1  226.68  220.28
   7   3   1   74.99   11.00
  -7   3  -1   92.69   29.60
   7   3   1   69.59   82.39
 -17  -3  -1   -7.20   40.30
  -8   4   1   65.39   19.30
  -6   4   1   21.60   14.30
  -4   4   1   73.29   13.20
  -2  -4   1   52.19    7.50
   2  -4  -1   39.70    8.80
  -2   4   1   37.20    8.60
   0  -4  -1    9.30    6.20
   0   4   1    9.20    6.50
  -2  -4  -1  -18.40   42.90
  -2  -4  -1   10.10    5.30
  -2  -4  -1    8.10    6.50
   2  -4   1  -21.30  166.38
   2  -4   1   10.90   11.70
   2  -4   1    0.80   10.40
  -2  -4  -1  -31.80   38.70
  -2  -4  -1   10.00    6.40
   2  -4   1   13.30   17.30
   2  -4   1    7.40   10.80
  -2  -4  -1   29.40   54.39
  -2  -4  -1   13.40    8.40
  -2  -4  -1   25.40   74.19
  -2  -4  -1  117.49  147.09
   2  -4   1   13.20   20.80
  -2  -4  -1   25.60   42.60
   2  -4   1  218.48  142.49
  -2   4  -1   31.20   34.90
  -2   4  -1   12.40   11.30
  -2   4  -1  -18.30   38.20
   2   4   1   49.10  113.09
  -2   4  -1   17.00   15.50
   2   4   1   11.20   38.10
  -2   4  -1   -8.90   14.10
  -2   4  -1   25.60  103.39
   2   4   1  -40.70   56.49
  -4  -4  -1   60.59   14.40
  -6  -4  -1   34.80   12.70
  -8  -4  -1  115.29   23.10
 -10  -4  -1  101.49   25.00
 -12  -4  -1   61.49   28.40
 -14  -4  -1   64.09   31.90
 -16  -4  -1   56.59   41.50
 -13   5   1  196.18   41.20
 -11   5   1    3.70   26.40
  -9   5   1  115.39   26.70
  -7   5   1   -9.20   16.40
  -5  -5   1   15.70    9.30
  -5   5   1    1.30   13.00
  -3  -5   1   22.30    8.60
  -3   5   1   18.50    8.60
   1  -5  -1   29.20    9.30
  -1   5   1   39.00    8.60
  -1  -5  -1   36.10   12.70
  -3  -5  -1   -8.40    8.90
  -5  -5  -1   26.90   12.60
  -5   5  -1   38.10   14.10
  -7  -5  -1   27.90   17.90
  -9  -5  -1   31.20   19.40
 -11  -5  -1   36.80   24.20
 -13  -5  -1  116.19   38.30
 -15  -5  -1   14.40   39.20
 -16  -6   1   32.20   42.70
 -14  -6   1   -3.00   32.50
 -14   6   1    7.40   60.49
 -12  -6   1  -30.00   24.90
 -12   6   1   44.50   39.40
 -10  -6   1   25.30   21.50
 -10   6   1  -11.40   25.50
  -8  -6   1   15.20   16.90
  -6  -6   1    0.20   13.10
  -6   6   1   22.20   17.50
  -4  -6   1   61.29   13.90
  -4   6   1   34.70   11.70
  -2  -6   1   15.00    7.50
  -2   6   1   21.10    8.50
   0  -6  -1   23.80   10.80
  -2  -6  -1   22.90   12.50
  -4  -6  -1  250.27   31.50
  -6  -6  -1   35.80   17.10
  -6   6  -1   15.80   14.20
  -8  -6  -1   40.20   20.20
  -8   6  -1   82.39   25.60
 -10  -6  -1   17.10   23.90
 -10   6  -1   63.09   28.10
 -12  -6  -1   -2.50   29.50
 -12   6  -1  120.39   38.70
 -14  -6  -1   38.70   42.50
 -13  -7   1  -20.30   39.40
 -11  -7   1   66.09   28.80
 -11   7   1   88.89   34.70
  -9  -7   1   11.30   20.20
  -9   7   1   17.60   28.70
  -7  -7   1   74.79   21.70
  -7   7   1   82.59   21.00
  -5  -7   1   -8.20   13.30
  -5   7   1  -11.80   10.80
  -3  -7   1   40.80   12.00
  -3   7   1   41.60   10.30
  -1  -7  -1  -10.20   19.90
  -3  -7  -1    6.60   14.60
  -5  -7  -1   22.50   16.00
  -7  -7  -1   17.20   21.40
  -7   7  -1   30.00   18.10
  -9  -7  -1   33.30   25.60
 -11  -7  -1  119.49   34.60
 -11   7  -1  151.68   43.00
 -13  -7  -1   25.60   35.20
 -12  -8   1   69.49   36.40
  -8  -8   1   18.70   25.80
  -8   8   1  -31.00   20.20
  -6  -8   1   10.90   18.10
  -6   8   1   18.40   11.80
  -4  -8   1  -24.30   16.90
  -2  -8  -1   50.99   18.60
  -4  -8  -1   18.60   21.30
  -6  -8  -1  -20.70   22.70
  -8  -8  -1  -12.60   25.40
 -10  -8  -1  133.29   36.10
 -12  -8  -1   80.69   41.30
  -9  -9   1  -17.10   32.20
  -7  -9   1   95.79   28.60
  -3  -9  -1  -43.80   19.60
  -5  -9  -1   45.60   28.80
  -7  -9  -1   27.60   34.40
  -9  -9  -1  -49.80   36.20
 -10   0   2  -17.50   24.10
 -10   0   2   43.20   19.00
  10   0  -2   13.30   36.90
 -10   0   2   28.90   27.90
  10   0  -2   29.30   19.50
 -10   0   2  -37.80   75.19
 -10   0   2  -49.10  156.98
  10   0  -2  -33.90   34.10
  10   0  -2   53.89   18.90
 -10   0   2   37.50   18.40
  10   0  -2   23.30   16.70
  10   0  -2   33.40   27.90
 -10   0   2   24.70   18.40
  10   0  -2  -14.40  176.78
  10   0  -2   10.80   15.50
  10   0  -2   40.40   61.59
   8   0  -2 3201.48  257.07
   8   0  -2 3123.79  258.97
  -8   0   2 3194.08  262.77
   8   0  -2 2787.12  257.67
   8   0  -2 3147.59  253.67
  -8   0   2 3052.99  260.17
  -8   0   2 2991.70  290.97
   8   0  -2 3041.60  254.67
  -8   0   2 3102.69  256.77
  -8   0   2 2836.82  367.06
   8   0  -2 2980.10  288.07
   8   0  -2 2982.80  256.07
  -8   0   2 3159.98  255.57
   8   0  -2 3029.20  384.46
  -8   0   2 3219.58  255.87
   6   0  -2  214.38   62.09
   6   0  -2  143.19   24.00
   6   0  -2  185.58   26.80
  -6   0   2  169.78   28.90
  -6   0   2  175.28   31.70
   6   0  -2  167.48   23.20
  -6   0   2  305.77  174.28
   6   0  -2  180.98   21.90
  -6   0   2  268.07   69.99
  -6   0   2  178.88   23.60
  -6   0   2  146.39   23.90
   6   0  -2  176.68   94.59
   6   0  -2  161.78   27.80
  -6   0   2  162.68   22.80
   6   0  -2  176.18   25.10
   4   0  -2  704.93   61.59
  -4   0   2  737.73   65.49
  -4   0   2  688.23   62.09
  -4   0   2  646.94   79.59
  -4   0   2  763.32   66.39
   4   0  -2  738.13  115.99
   4   0  -2  701.83   64.29
   4   0  -2  698.13   81.59
  -4   0   2  738.23   63.39
   4   0  -2  734.33   63.39
  -4   0   2  731.03   62.19
   4   0  -2  625.94   62.89
   4   0  -2  735.03   62.29
  -2   0   2   29.00    5.90
   2   0  -2   17.90    4.90
   0   0  -2   36.00    5.80
   0   0   2   22.40    5.00
  -2   0  -2  915.81   75.79
   2   0   2  899.71   75.59
   4   0   2   24.70   10.30
   4   0   2   38.60   52.39
   4   0   2   32.90   10.20
  -4   0  -2   32.50   10.60
  -4   0  -2   31.90   10.20
   4   0   2   37.80   88.99
  -4   0  -2   39.60   10.60
  -4   0  -2   29.40    9.60
   4   0   2   31.00   14.90
   4   0   2   34.50   12.40
   4   0   2   23.20   20.30
  -4   0  -2   63.49   23.40
   4   0   2   32.90   10.20
   4   0   2   29.90   12.50
  -6   0  -2 3379.06  296.57
   6   0   2 4134.89  347.37
   6   0   2 3353.06  310.37
   6   0   2 3359.76  295.67
   6   0   2 3741.73  301.57
   6   0   2 3864.31  297.67
  -6   0  -2 3680.73  301.57
   6   0   2 3761.52  298.47
   6   0   2 3238.18  296.07
  -6   0  -2 3823.32  310.27
  -6   0  -2 3781.12  299.27
  -6   0  -2 3481.95  294.47
   8   0   2  280.07   44.10
  -8   0  -2  296.67   47.00
  -8   0  -2  318.67   35.20
  -8   0  -2  296.37   40.80
  -8   0  -2  328.57   40.10
   8   0   2  354.76   39.60
   8   0   2  413.16  144.29
   8   0   2  337.67   41.30
   8   0   2  315.67   40.00
   8   0   2  317.57   39.50
  -8   0  -2  509.15  115.89
   8   0   2  306.97   50.29
   8   0   2  405.36   73.69
  -8   0  -2  296.67   41.30
 -18   0  -2  276.07   66.69
  -9  -1   2   -7.20   11.70
  -9  -1   2   -4.20   13.90
   9  -1  -2   19.00   13.00
   9  -1  -2   10.00   16.70
   9  -1  -2    7.20   50.89
   9  -1  -2   21.40   15.40
  -9  -1   2    9.70   20.30
  -9  -1   2    8.00   14.20
  -9  -1   2  -48.50  129.69
  -9  -1   2  -12.80   17.60
   9  -1  -2   12.70   23.70
   9  -1  -2   -5.40   16.70
   9  -1  -2   19.80  142.49
   9  -1  -2    0.70   17.00
  -9  -1   2   13.60   70.59
   9   1  -2   14.90   10.70
   9   1  -2   11.40   57.39
   9   1  -2 -104.09  124.19
  -9   1   2   16.60   25.20
  -9   1   2    5.30   69.09
  -9   1   2   12.40   15.20
  -9   1   2   17.10   14.80
   9   1  -2   -4.70   38.70
  -9   1   2   12.90   18.10
   9   1  -2    6.60   14.90
  -9   1   2   25.70  143.59
  -9   1   2  -15.10   23.70
   9   1  -2   -7.10   14.80
   9   1  -2   -2.90   11.60
   9   1  -2  -14.60   27.10
   7  -1  -2  106.39   25.20
   7  -1  -2   86.69   17.70
   7  -1  -2   65.59   23.50
  -7  -1   2   96.99   18.70
  -7  -1   2  114.29   18.50
  -7  -1   2  112.19   68.39
   7  -1  -2  181.98   56.39
   7  -1  -2   81.89  103.09
   7  -1  -2  103.59   21.00
  -7  -1   2   84.99   22.40
  -7  -1   2   74.49   17.70
  -7  -1   2  -25.90  104.79
  -7  -1   2  114.39   23.10
   7  -1  -2   97.69   22.40
   7   1  -2   87.89   26.00
   7   1  -2   96.89   17.80
   7   1  -2  107.99   19.80
   7   1  -2  136.79   61.29
  -7   1   2  178.78   58.99
  -7   1   2  112.49   28.70
   7   1  -2   89.99   13.80
  -7   1   2  112.59   22.30
   7   1  -2   81.19   34.80
  -7   1   2   99.09   25.40
  -7   1   2  108.49   20.70
   7   1  -2   26.40   93.79
   7   1  -2   94.09   21.00
   7   1  -2   75.69   14.50
  -7   1   2  138.99  112.99
  -7   1   2   71.69   18.40
   5  -1  -2   45.30   16.00
  -5  -1   2   50.59   11.40
   5  -1  -2   24.80   13.50
  -5  -1   2   41.10   43.50
   5  -1  -2   36.00   11.60
  -5  -1   2   26.40   57.69
   5  -1  -2   21.40   29.00
   5  -1  -2   46.40   14.50
  -5  -1   2   48.40    9.70
  -5  -1   2   41.50   10.80
  -5  -1   2   71.39   21.40
   5  -1  -2   42.50   12.00
   5  -1  -2   40.80   82.99
  -5  -1   2   39.50   10.00
  -5  -1   2   41.10   13.20
  -5   1   2   36.60   12.80
   5   1  -2   42.90   12.70
  -5   1   2   51.39   35.50
   5   1  -2   61.89   47.30
  -5   1   2   30.00   17.50
  -5   1   2  -39.60   72.79
  -5   1   2   39.90   12.60
  -5   1   2   42.80   14.10
   5   1  -2   59.29   10.40
   5   1  -2   37.40    8.50
   5   1  -2   61.59   69.49
   5   1  -2   30.40    9.20
  -5   1   2   28.50   16.80
   5   1  -2   50.99   11.40
   3  -1  -2   -0.60    5.00
  -3   1   2   -3.50    5.10
   1  -1  -2   11.60    4.70
  -1  -1   2    4.70    3.10
   1   1  -2    6.60    3.20
  -1   1   2   -1.50    4.00
  -1  -1  -2    9.70    4.70
   1  -1   2   11.10    4.10
   1   1   2   10.40    4.70
  -1   1  -2    4.00    3.50
  -3  -1  -2    3.80    6.90
  -3   1  -2    8.20    6.10
  -5  -1  -2  143.99   20.30
  -7  -1  -2   -7.30   62.89
  -7  -1  -2    0.60   11.40
   7  -1   2  -14.70   96.19
   7  -1   2  -39.50  141.09
  -7  -1  -2   43.90   40.50
   7  -1   2   34.90   18.90
   7  -1   2    3.90   13.10
   7  -1   2   16.00   13.20
  -7  -1  -2   27.00   52.79
  -7  -1  -2   15.80   10.60
   7  -1   2   21.80   15.20
   7  -1   2   28.00   21.70
   7  -1   2   51.59   30.50
  -7  -1  -2    0.90   11.10
  -7  -1  -2   13.20   14.10
  -7  -1  -2   22.20   15.20
   7  -1   2   18.00   23.60
   7   1   2   26.70   33.30
  -7   1  -2   12.60   16.40
   7   1   2    0.00    9.40
  -7   1  -2    6.20   18.80
  -7   1  -2    0.60   12.80
   7   1   2  -21.10   73.79
   7   1   2   19.80   11.70
  -7   1  -2   35.00   15.70
   7   1   2   13.40   17.20
   7   1   2  204.28  150.68
   7   1   2  -31.70   40.10
   7   1   2   12.70   14.30
  -7   1  -2   15.80   12.80
 -17  -1  -2  -44.40   41.90
   8  -2  -2   89.89   26.90
   8  -2  -2  112.69   27.50
   8  -2  -2  110.09  154.88
  -8  -2   2  113.49   19.90
  -8  -2   2  136.89   73.99
  -8  -2   2  102.39   25.10
  -8  -2   2   91.89   65.19
   8  -2  -2   55.29   51.29
  -8  -2   2   88.89   16.30
  -8  -2   2  102.59   17.90
   8  -2  -2  106.79   30.80
  -8  -2   2  157.58  112.59
   8  -2  -2  111.09   26.50
  -8  -2   2  148.79   47.20
   8  -2  -2  106.19   23.10
  -8  -2   2   94.59   15.20
   8   2  -2   94.79   16.10
  -8   2   2  -35.00  171.18
   8   2  -2  148.49   74.79
  -8   2   2   72.19   28.40
   8   2  -2  100.59   98.29
   8   2  -2   63.29   51.59
  -8   2   2   89.19   25.30
  -8   2   2  119.39   59.79
  -8   2   2   68.29   33.00
  -8   2   2   99.59   23.20
   8   2  -2   64.29   37.10
  -8   2   2  115.99   24.50
   8   2  -2   66.19   16.20
  -6   2   2  144.39   20.80
  -4   2   2   30.00   10.10
   2  -2  -2  306.37   28.60
  -2  -2   2  305.07   27.00
  -2   2   2  310.67   28.70
   0  -2  -2  571.64   52.29
   0  -2   2  610.84   50.19
   0   2  -2  631.24   50.09
   0   2   2  622.14   52.09
   2   2   2   20.30    7.20
  -2   2  -2   15.40    5.60
  -4  -2  -2   31.10   10.00
  -6  -2  -2  197.38   26.20
  -8  -2  -2  432.46   45.80
 -16  -2  -2   61.59   40.40
  -7   3   2   60.89   17.80
  -5   3   2  583.64   54.09
   3  -3  -2  584.54   50.09
  -3   3   2  553.24   50.19
  -1  -3   2    1.50    3.00
   1  -3  -2   -1.20    5.80
  -1   3   2    5.40    5.60
   1   3   2  328.17   30.20
  -1   3  -2  308.17   26.10
  -3  -3  -2  640.14   55.69
  -3   3  -2  611.24   52.69
  -5  -3  -2  146.09   22.60
  -7  -3  -2   16.20   14.80
  -9  -3  -2  131.09   25.60
 -11  -3  -2   63.59   26.20
 -13  -3  -2   64.89   32.20
 -15  -3  -2   57.19   38.50
 -17  -3  -2  174.58   48.80
 -10   4   2   -4.50   19.90
  -8   4   2 1344.27  116.89
  -6   4   2  108.59   20.50
  -4   4   2  283.27   30.90
   2  -4  -2   -4.00    8.70
  -2   4   2    0.00    7.70
   0   4   2  108.99   14.90
  -2  -4  -2  258.07   28.20
  -4  -4  -2    0.50   11.20
  -6  -4  -2 1618.94  137.79
  -8  -4  -2   58.09   19.90
 -10  -4  -2   16.20   20.40
 -12  -4  -2   44.00   26.20
 -14  -4  -2  183.88   42.30
 -16  -4  -2   66.19   42.30
 -13   5   2  -52.89   35.80
 -11   5   2   57.09   30.30
  -9   5   2   37.70   25.80
  -5   5   2   36.90   16.40
   3  -5  -2  210.28   26.70
  -3  -5   2  225.08   22.30
  -3   5   2  245.68   26.50
   1  -5  -2    9.90    9.60
  -1   5   2   -7.90    8.10
  -1  -5  -2  221.18   25.10
   1   5   2  157.28   23.70
  -3  -5  -2  171.58   23.10
  -5  -5  -2   61.89   18.40
  -5   5  -2   77.19   12.80
  -7  -5  -2   51.29   18.50
  -9  -5  -2   86.89   26.30
 -11  -5  -2  -23.70   26.70
 -13  -5  -2  111.89   36.90
 -15  -5  -2    7.00   41.10
 -12   6   2  -15.20   34.30
 -10   6   2   -0.30   26.80
  -8  -6   2  350.66   41.60
  -8   6   2  365.76   47.20
  -6  -6   2  156.58   21.50
  -6   6   2  123.09   22.50
  -4  -6   2   99.49   15.70
  -4   6   2  103.19   18.10
   0  -6  -2   63.69   15.10
   0   6   2   58.09   14.00
  -2  -6  -2   64.99   16.00
  -4  -6  -2   28.80   15.60
  -6  -6  -2  530.05   55.69
  -6   6  -2  552.14   48.10
  -6   6  -2  488.15   51.89
  -8  -6  -2    9.60   20.60
  -8   6  -2   37.40   22.30
 -10  -6  -2   -4.00   24.30
 -14  -6  -2   32.50   38.90
 -14   6  -2   50.39   35.80
 -13  -7   2  -15.50   31.30
 -13   7   2  129.99   47.10
 -11  -7   2   20.20   25.20
 -11   7   2  -41.70   32.70
  -9  -7   2   16.50   21.30
  -9   7   2   47.00   31.60
  -7  -7   2   13.60   14.60
  -5  -7   2  239.28   29.00
  -5   7   2  215.18   28.10
  -3   7   2  415.06   41.00
   1  -7  -2   -6.00   13.80
  -1  -7  -2  212.18   30.10
  -3  -7  -2  456.65   49.10
  -5  -7  -2   43.90   19.90
  -7  -7  -2   27.40   22.10
  -7   7  -2  -18.20   14.40
  -7   7  -2   12.10   11.10
  -9  -7  -2   62.69   29.60
  -9   7  -2  121.49   23.00
  -9   7  -2  161.38   46.10
 -11  -7  -2   33.10   36.30
 -11   7  -2   48.80   27.00
 -11   7  -2  -87.19   77.39
 -13  -7  -2   51.19   40.10
 -13   7  -2  -18.60   33.40
 -12  -8   2  -15.20   30.10
 -10  -8   2  162.48   32.30
  -8  -8   2  244.98   35.60
  -6  -8   2    8.80   16.40
  -6   8   2   19.60   16.40
  -4   8   2   32.80   14.00
   0  -8  -2  209.58   27.70
  -2  -8  -2   50.59   20.50
  -4  -8  -2   25.40   24.50
  -6  -8  -2  157.18   32.90
  -8  -8  -2   24.00   29.10
 -10  -8  -2   41.50   34.70
  -9  -9   2   28.10   32.60
  -7  -9   2    4.10   23.20
  -1  -9  -2   44.30   20.30
  -3  -9  -2   58.29   25.40
  -5  -9  -2   18.00   31.10
  -7  -9  -2   33.50   35.40
 -10   0   3   17.90   18.50
 -10   0   3   41.40   19.90
 -10   0   3   12.90   25.00
  10   0  -3   -4.00   41.60
 -10   0   3   -8.10   76.19
  10   0  -3   14.50   18.90
  10   0  -3  -15.50   17.90
  10   0  -3 -164.28  164.08
  10   0  -3  125.89   78.09
  10   0  -3    3.80   15.60
 -10   0   3    6.40   14.90
 -10   0   3   -1.00   26.00
  10   0  -3   -6.60   13.20
  10   0  -3   17.20   15.40
  10   0  -3  -13.10   30.20
   8   0  -3  224.58   32.50
  -8   0   3  189.48   29.80
   8   0  -3  247.48   33.20
  -8   0   3  392.26  103.19
  -8   0   3  265.27   46.30
   8   0  -3  215.08   27.30
  -8   0   3  191.98   32.30
   8   0  -3  190.28  145.59
  -8   0   3  188.28   36.50
   8   0  -3  182.88   33.40
   8   0  -3  176.88   30.40
   8   0  -3  281.77   81.89
  -8   0   3   75.39  144.39
  -6   0   3  108.09   18.20
   6   0  -3  120.39   19.30
   6   0  -3   49.90   13.70
   6   0  -3   94.79   18.60
  -6   0   3   75.59   95.89
   6   0  -3   49.99   15.70
   6   0  -3   80.79   18.50
  -6   0   3   73.79   21.10
  -6   0   3   75.29   19.70
  -6   0   3   96.09   44.40
   6   0  -3   41.10   16.70
  -6   0   3   86.59   16.60
   6   0  -3   31.20   48.30
   6   0  -3  141.19  102.39
  -4   0   3  290.87   28.80
  -2   0   3  815.52   69.89
   2   0  -3  853.01   70.19
   0   0   3 1209.78  100.09
   0   0  -3 1212.18  100.29
   2   0   3  168.08   18.60
  -4   0  -3   25.60   10.60
  -6   0  -3  199.68   26.00
  -8   0  -3    5.80   14.10
 -10   0  -3 3092.89  258.37
 -12   0  -3   66.49   27.50
 -16   0  -3  -15.70   35.90
   9  -1  -3   24.40   61.09
  -9  -1   3   52.49   16.80
   9  -1  -3  -96.39  139.29
   9  -1  -3   38.50   22.00
  -9  -1   3  140.89  156.88
  -9  -1   3   75.69   26.90
  -9  -1   3   16.40   18.90
   9  -1  -3   14.60   18.40
   9  -1  -3   72.59   31.40
   9  -1  -3   32.90   16.30
  -9  -1   3   18.90   16.10
  -9  -1   3   27.40   21.10
   9  -1  -3   55.39   21.00
  -9  -1   3  -11.10   68.29
  -9   1   3   70.49   32.80
   9   1  -3   24.90   18.90
  -9   1   3    0.40  159.78
   9   1  -3   43.60  154.88
  -9   1   3   48.10   18.00
  -9   1   3   41.70   27.20
   9   1  -3   65.49   14.10
  -9   1   3   67.19   20.90
  -9   1   3   58.19   21.70
  -9   1   3   61.09   74.69
   9   1  -3   36.90   15.10
   9   1  -3   67.19   30.60
   9   1  -3   48.70   19.50
   9   1  -3   51.39   14.60
   9   1  -3   95.29   73.49
  -7  -1   3  367.16  138.59
  -7  -1   3  370.26  101.49
  -7  -1   3  297.07   34.80
  -7  -1   3  360.36   44.00
   7  -1  -3  283.97   38.80
  -7  -1   3  267.67   40.70
   7  -1  -3  292.67   45.30
   7  -1  -3  342.47   74.29
   7  -1  -3  347.07   38.70
  -7  -1   3  309.67   34.60
   7  -1  -3  290.67   35.80
  -7  -1   3  283.67   36.20
   7  -1  -3  324.37  137.39
  -7   1   3  343.97   69.59
   7   1  -3  293.67  113.89
  -7   1   3  293.47   36.30
  -7   1   3  176.48  131.79
   7   1  -3  456.05   93.49
  -7   1   3  319.87   40.20
   7   1  -3  323.27   47.10
   7   1  -3  293.27   41.30
   7   1  -3  323.97   32.70
  -7   1   3  333.57   45.20
   7   1  -3  332.27   38.00
  -7   1   3  273.67   49.20
   7   1  -3  289.97   40.90
  -5   1   3   23.10   10.00
  -3  -1   3    7.30    5.50
   3  -1  -3    0.30    7.10
  -3   1   3    0.80    6.60
  -1  -1   3    3.50    4.20
   1  -1  -3    6.40    5.40
   1   1  -3   -1.50    4.10
  -1   1   3    2.00    5.30
   1  -1   3    0.80    4.70
   1   1   3   -3.30    6.10
  -1   1  -3    7.80    4.80
  -3  -1  -3    8.60    7.40
   3   1   3    2.00    8.70
  -3   1  -3   26.70    9.60
  -5   1  -3  334.17   33.80
  -7  -1  -3   11.70   13.50
  -7   1  -3   33.60   12.90
  -9  -1  -3   23.10   18.60
 -11  -1  -3   22.60   20.20
 -13  -1  -3   59.39   30.70
 -15  -1  -3   37.00   35.80
 -15   1  -3   21.10   33.60
 -17  -1  -3   33.90   42.50
 -17   1  -3  114.79   41.80
  -8   2   3    2.90   13.70
  -6   2   3 4752.32  386.26
   4  -2  -3  226.78   25.70
  -4  -2   3  237.38   24.60
  -4   2   3  258.17   26.50
  -2  -2   3    2.50    4.70
  -2   2   3    0.30    7.40
   0  -2  -3    3.40    7.10
   0  -2   3    8.20    4.40
   0   2  -3   14.80    4.90
   0   2   3    8.40    6.80
  -2  -2  -3  120.49   17.30
   2   2   3  142.79   18.70
  -2   2  -3  121.69   14.90
  -4  -2  -3 4533.05  371.16
  -4   2  -3 4587.14  369.46
  -6  -2  -3  142.19   23.60
  -6   2  -3   86.59   17.20
  -8  -2  -3  221.78   31.10
 -10  -2  -3  117.59   28.20
 -12  -2  -3  -14.70   22.80
 -14  -2  -3   80.89   34.90
 -14   2  -3  103.29   34.60
 -16  -2  -3  468.15   70.69
 -16   2  -3  562.44   78.59
 -11   3   3    8.50   21.10
  -9   3   3   49.50   19.20
  -7   3   3    1.80   16.10
  -5   3   3  322.27   34.40
   3  -3  -3  465.25   44.50
  -3  -3   3  477.65   41.90
  -3   3   3  492.35   44.70
   1  -3  -3  890.61   78.19
  -1  -3   3  935.31   74.89
  -1   3   3  901.71   77.79
  -1  -3  -3  281.57   31.40
   1   3   3  348.47   31.90
  -1   3  -3  316.57   27.80
  -3  -3  -3  458.95   44.50
  -3   3  -3  460.75   40.80
   3   3   3  454.65   44.40
  -5  -3  -3    4.30   11.30
  -5   3  -3    2.00    8.80
  -7  -3  -3   18.30   17.60
  -7   3  -3    9.80   11.40
  -9  -3  -3   35.40   22.00
 -11  -3  -3    6.90   24.00
 -15  -3  -3   63.29   41.50
 -15   3  -3   65.99   37.10
 -14   4   3  -38.50   37.30
 -12   4   3 1590.74  142.89
 -10   4   3   33.40   26.20
  -8   4   3   61.99   20.90
  -6   4   3   34.10   16.80
   4  -4  -3   87.89   14.70
  -4   4   3   56.49   15.50
  -2  -4   3  413.46   35.10
   2  -4  -3  399.96   39.90
  -2   4   3  404.66   39.30
   0  -4  -3  541.45   50.29
   0   4   3  543.55   49.70
  -2  -4  -3   24.70   10.30
   2   4   3   21.20   11.40
  -2   4  -3   19.00    5.60
  -4  -4  -3   13.50   12.90
  -4   4  -3   46.10   10.20
  -6  -4  -3   33.20   16.40
  -6   4  -3   42.50   12.60
  -8  -4  -3   43.00   22.00
  -8   4  -3   35.90   15.60
 -10  -4  -3 1424.36  129.09
 -10   4  -3 1398.06  123.49
 -12  -4  -3   -9.90   32.20
 -12   4  -3    4.60   23.80
 -14  -4  -3  257.57   53.69
 -14   4  -3  218.08   42.70
 -16  -4  -3  -49.90   45.50
 -16   4  -3  -67.19   39.40
 -13   5   3  -37.20   40.40
 -11   5   3   37.80   32.70
  -9   5   3  299.47   40.70
  -7   5   3  684.13   66.79
  -5   5   3   50.49   17.50
   3  -5  -3  193.78   25.80
  -3  -5   3  173.38   19.70
  -3   5   3  175.88   25.70
   1  -5  -3  334.07   36.90
  -1   5   3  391.16   37.10
  -1  -5  -3   90.99   17.60
   1   5   3   83.99   16.80
  -3  -5  -3  111.89   19.40
  -5  -5  -3  599.24   56.49
  -5   5  -3  511.65   53.19
  -7  -5  -3  114.59   26.00
  -7   5  -3  102.39   18.30
  -9  -5  -3   13.50   21.10
  -9   5  -3   -0.70   17.30
 -11  -5  -3    0.80   27.90
 -11   5  -3   -5.90   21.70
 -13  -5  -3   -1.90   33.70
 -13   5  -3   18.00   29.00
 -15  -5  -3    3.60   43.50
 -15   5  -3   90.39   42.50
 -12   6   3   13.60   36.60
 -10   6   3    2.10   27.80
  -8   6   3   82.69   28.00
  -6   6   3 1146.59  102.09
  -4  -6   3  320.77   28.90
  -4  -6   3  274.17   31.50
  -4   6   3  324.07   36.60
   2  -6  -3   25.60   13.70
  -2   6   3   37.30   13.10
   0  -6  -3   18.20   14.20
   0   6   3   19.80   17.20
  -2  -6  -3  269.77   34.70
  -4  -6  -3 1003.40   90.39
  -6  -6  -3  151.78   29.50
  -6   6  -3  177.58   26.20
  -6   6  -3  210.28   25.70
  -8  -6  -3   31.90   24.00
  -8   6  -3   16.80   15.90
 -10  -6  -3  106.99   33.40
 -10   6  -3   96.19   25.30
 -12  -6  -3   21.10   35.30
 -12   6  -3    8.40   28.20
 -14  -6  -3  152.28   50.09
 -14   6  -3  187.18   43.10
 -15  -7   3  136.39   47.20
 -13  -7   3    6.60   32.30
 -13   7   3  -25.50   46.10
 -11  -7   3   30.60   25.20
 -11   7   3  -23.60   38.80
  -9  -7   3   83.49   22.10
  -9   7   3   55.19   28.20
  -7  -7   3   49.80   17.10
  -7   7   3    0.50   21.90
  -5  -7   3  260.97   31.70
  -5  -7   3  275.67   29.30
   3  -7  -3  393.56   41.60
  -3   7   3  345.67   40.60
   1  -7  -3  592.64   58.19
  -1  -7  -3  283.57   35.40
  -3  -7  -3  508.25   55.69
  -5  -7  -3   10.60   21.70
  -7  -7  -3   13.60   23.80
  -7   7  -3   -6.30   14.60
  -7   7  -3    2.50   10.80
  -9  -7  -3   24.90   27.60
  -9   7  -3   13.70   17.90
 -11  -7  -3   -1.50   35.20
 -11   7  -3    1.90   26.80
 -12  -8   3  132.39   38.20
 -10  -8   3  169.88   32.10
  -8  -8   3   12.20   21.60
  -8   8   3  -14.00   25.90
  -6  -8   3  375.56   41.70
  -6   8   3  326.97   45.50
  -4   8   3  -16.20   17.30
   2  -8  -3  143.79   24.50
  -2   8   3  172.98   31.50
   0  -8  -3  169.58   28.20
  -2  -8  -3   58.79   23.00
  -4  -8  -3  441.66   58.89
  -6  -8  -3  -11.10   26.80
  -8  -8  -3  135.99   37.30
 -10  -8  -3  138.89   43.90
  -9  -9   3   -7.70   53.29
   1  -9  -3   36.70   19.90
  -1  -9  -3   77.99   25.10
  -3  -9  -3   93.09   30.90
  -5  -9  -3  106.39   37.50
  -7  -9  -3   45.70   38.40
 -10   0   4   -0.40   30.50
  10   0  -4   47.50   24.40
 -10   0   4  -20.50   86.99
 -10   0   4  -12.70   17.40
  10   0  -4   -4.10   16.40
  10   0  -4   34.50   21.90
 -10   0   4   -4.50  219.48
 -10   0   4   -9.20   17.80
  10   0  -4    7.70   18.60
  10   0  -4   -1.20   19.20
  10   0  -4   89.59   76.99
  10   0  -4 -118.79  169.88
  10   0  -4    9.30   14.20
 -10   0   4    0.90   25.40
 -10   0   4  -19.70   20.50
  -8   0   4   43.90   16.80
  -6   0   4   11.10   10.90
   4   0  -4   56.69   12.50
  -4   0   4   61.29   12.80
  -2   0   4  281.67   28.30
   0   0   4  175.38   19.60
   0   0  -4  155.18   19.10
  -2   0  -4   57.09   12.40
   2   0   4   60.59   12.50
  -4   0  -4   13.90   10.20
  -6   0  -4  232.68   31.20
  -8   0  -4  108.59   23.80
 -10   0  -4   12.90   18.10
 -12   0  -4  232.28   40.60
 -14   0  -4    4.80   30.60
 -16   0  -4   47.70   42.50
  -9   1   4   25.40   16.20
  -7   1   4  128.19   21.60
   5  -1  -4   -0.50    8.10
  -5  -1   4   21.40   10.70
  -5   1   4   31.60   11.00
   3  -1  -4   -0.70    7.10
  -3  -1   4    4.50    6.90
  -3   1   4    6.70    8.80
   1  -1  -4   -1.00    7.50
  -1  -1   4    6.70    6.10
   1   1  -4    9.40    6.60
  -1   1   4    7.80    7.00
   1  -1   4    9.50    6.70
  -3  -1  -4    6.50   10.30
  -3   1  -4   13.30    8.40
   3   1   4   12.90    9.70
  -5  -1  -4   15.60   13.60
  -5   1  -4   15.40   12.00
  -7  -1  -4   46.80   19.40
  -7   1  -4   19.90   13.50
  -9  -1  -4   19.60   18.30
  -9   1  -4   40.00   18.40
 -11  -1  -4   48.60   24.80
 -11   1  -4   35.10   23.00
 -13   1  -4   -5.50   26.80
 -15  -1  -4   39.00   37.60
 -15   1  -4   78.09   36.70
 -17  -1  -4    9.80   47.20
 -17   1  -4   12.00   47.10
 -12   2   4   25.10   24.30
 -10   2   4   76.59   22.00
  -8   2   4    8.80   14.90
  -6  -2   4   11.90   10.20
  -6   2   4   -6.50   15.00
   4  -2  -4   84.99   14.30
  -4  -2   4   69.99   13.30
  -4   2   4   97.29   16.50
   2  -2  -4  168.78   20.80
  -2  -2   4  165.78   19.00
  -2   2   4  180.18   21.60
   2   2  -4  155.78   19.80
   0  -2  -4   64.29   13.50
   0  -2   4   81.99   11.10
   0   2  -4   58.09   10.70
   0   2   4   72.59   14.10
   2  -2   4   70.19   10.90
  -2  -2  -4   40.80   11.70
   2   2   4   32.40   11.70
  -4  -2  -4   17.10   11.60
  -4   2  -4   -4.80    8.70
  -6  -2  -4  -10.90   15.30
  -6   2  -4   11.50   12.90
  -8  -2  -4   59.69   22.20
  -8   2  -4   56.79   18.90
 -10  -2  -4   23.80   23.40
 -10   2  -4  -12.80   17.50
 -12  -2  -4  -14.30   26.00
 -12   2  -4   44.50   25.30
 -14  -2  -4   29.90   37.20
 -14   2  -4   62.19   41.60
 -16  -2  -4   -6.40   41.70
 -16   2  -4   11.90   42.40
 -13   3   4  -11.80   27.90
 -11   3   4   60.59   24.20
  -9   3   4   13.30   20.80
  -7   3   4  134.49   24.80
  -5  -3   4  118.79   17.30
   5  -3  -4   91.19   17.30
  -5   3   4  130.69   21.60
  -3  -3   4   -2.40    7.10
   3  -3  -4    5.70    8.90
  -3   3   4    7.40   10.90
  -1  -3   4    4.40    5.70
   1  -3  -4   -4.20    8.40
   1   3  -4   -4.10    7.00
  -1   3   4  -14.60    8.60
   1  -3   4  112.89   14.20
  -1  -3  -4  102.49   17.90
   1   3   4  107.49   17.30
  -1   3  -4  128.19   15.10
  -3  -3  -4   73.49   16.90
   3   3   4   43.10   13.80
  -3   3  -4   69.89   13.50
  -5  -3  -4   20.20   15.80
  -5   3  -4   19.50   11.20
  -7  -3  -4  124.59   27.40
  -7   3  -4  129.39   22.60
  -9  -3  -4  127.19   29.70
  -9   3  -4   60.69   21.10
 -11  -3  -4   23.90   26.90
 -11   3  -4   28.90   23.60
 -13  -3  -4  -13.00   36.70
 -13   3  -4  -32.10   27.60
 -15  -3  -4   50.89   43.80
 -15   3  -4   13.00   37.70
 -12   4   4    8.20   31.30
  -8   4   4    2.00   19.20
  -6  -4   4   43.70   13.60
  -6   4   4   23.10   17.70
   4  -4  -4   18.20   12.50
  -4  -4   4   12.80    9.40
  -4   4   4   26.50   14.40
  -2  -4   4   80.19   11.00
   2  -4  -4   58.69   14.40
  -2   4   4   48.70   14.90
   0  -4  -4   78.09   16.30
   0   4  -4   80.39   11.10
  -2  -4  -4   35.00   13.20
  -2   4  -4   59.49    9.90
   2   4   4   31.60   14.80
  -4   4  -4   18.50   10.30
  -6  -4  -4   68.69   22.70
  -6   4  -4   82.49   18.30
  -8  -4  -4  134.79   30.60
  -8   4  -4  135.09   23.60
 -10  -4  -4   -2.00   24.30
 -10   4  -4   27.50   21.30
 -12  -4  -4  142.39   40.10
 -12   4  -4   86.29   28.40
 -14  -4  -4   39.30   40.20
 -13   5   4  -11.70   37.50
 -11   5   4   -5.60   29.40
  -9   5   4  118.99   29.20
  -7   5   4   71.89   24.00
  -5  -5   4    4.50   12.40
   5  -5  -4    4.00   12.90
  -5   5   4  -10.10   15.40
  -3  -5   4    2.50    7.90
   3  -5  -4  -19.30   12.50
  -3   5   4    2.10   15.40
   1  -5  -4   -0.60   12.20
  -1   5   4    5.60   11.90
  -1  -5  -4    7.20   13.40
   1   5   4   11.80   13.70
  -3  -5  -4   -7.10   13.70
  -3   5  -4   -1.40    6.90
  -5  -5  -4    3.60   16.70
  -5   5  -4   15.50   11.60
  -7  -5  -4   25.90   22.90
  -7   5  -4   22.70   14.50
  -9  -5  -4   -6.10   23.80
  -9   5  -4   13.00   18.70
 -11   5  -4   61.39   26.20
 -13  -5  -4  -34.80   38.30
 -13   5  -4   33.30   32.30
 -12   6   4   69.09   38.40
 -10   6   4   57.39   31.80
  -8   6   4   62.89   30.00
  -6  -6   4   30.00   13.80
  -6   6   4  -22.30   18.80
   4  -6  -4   87.19   19.50
  -4  -6   4   96.19   14.30
  -4   6   4   82.69   20.50
   2  -6  -4  225.38   32.90
  -2   6   4  226.58   32.20
   0  -6  -4   95.29   19.40
   0   6   4   66.89   18.70
  -2  -6  -4   24.20   18.30
  -4  -6  -4   -1.50   17.20
  -6  -6  -4   18.70   20.50
  -6   6  -4    8.80   15.20
  -8  -6  -4   21.90   25.10
  -8   6  -4   -2.10   15.30
 -10  -6  -4  -22.20   35.20
 -10   6  -4   11.90   23.90
 -12  -6  -4   62.19   38.00
 -12   6  -4    9.50   30.20
 -13   7   4  -45.00   51.09
 -11   7   4   18.40   44.70
  -9   7   4   17.40   29.80
  -7  -7   4   55.19   18.60
  -7  -7   4   32.90   15.00
  -7   7   4  -13.90   24.10
  -5  -7   4   49.99   11.90
  -5  -7   4   56.19   13.80
  -5   7   4   18.70   19.50
   3  -7  -4  -14.60   16.70
  -3   7   4  -36.50   16.80
   1  -7  -4   14.20   18.10
  -1   7   4   12.60   17.30
  -1  -7  -4   49.40   22.10
  -3  -7  -4   42.20   23.50
  -5  -7  -4   18.90   23.60
  -7  -7  -4   63.99   28.00
  -7   7  -4   66.59   23.10
  -7   7  -4   33.40   15.20
  -9  -7  -4  -11.20   31.70
  -9   7  -4   48.70   20.50
 -11  -7  -4   46.20   38.90
 -11   7  -4   39.10   29.30
 -12  -8   4   46.50   32.70
 -10  -8   4   18.20   25.70
 -10   8   4   14.80   35.90
  -8  -8   4   31.50   19.40
  -8   8   4   47.00   29.80
  -6  -8   4   30.90   12.30
  -6  -8   4   12.10   14.10
  -6   8   4    0.80   22.90
  -4   8   4   19.90   20.10
   2  -8  -4   20.40   21.10
  -2   8   4   21.20   21.10
   0  -8  -4   34.50   22.70
  -2  -8  -4   -3.20   24.00
  -4  -8  -4   96.19   31.40
  -6  -8  -4   19.80   31.20
  -3   9   4   26.30   25.30
   1  -9  -4   -5.10   24.70
  -1  -9  -4  -23.20   27.80
  -3  -9  -4   62.89   33.10
  -5  -9  -4    1.50   36.50
  -7  -9  -4   88.49   45.10
 -12   0   5   55.59   24.30
 -10   0   5 1402.86  123.99
  -8   0   5   50.19   16.50
  -6   0   5 4696.73  384.96
   6   0  -5 4613.74  402.86
   6   0  -5 4941.81  379.06
   6   0  -5 4742.83  382.46
  -6   0   5 3967.30  376.86
   6   0  -5 4425.56  382.36
   6   0  -5 4548.25  380.46
  -6   0   5 4495.45  380.36
   6   0  -5 4761.32  379.26
   6   0  -5 4469.55  460.15
  -6   0   5 4270.17  467.45
  -6   0   5 4477.75  378.56
  -6   0   5 5301.37  386.16
  -4   0   5   -0.60    8.30
   4   0  -5    6.00    8.40
  -2   0   5   14.00    9.70
   2   0  -5    9.80    7.40
   0   0   5    3.60    8.00
   0   0  -5   -6.10    6.80
   2   0   5 4294.87  348.77
  -2   0  -5 4273.77  349.07
  -4   0  -5  195.08   27.70
  -6   0  -5 2068.59  175.08
  -8   0  -5    1.40   19.90
 -10   0  -5  -18.40   23.10
 -12   0  -5  354.16   53.29
 -14   0  -5  133.19   40.70
 -16   0  -5 1170.28  129.79
 -13   1   5  -19.10   24.00
 -11   1   5  119.99   25.80
  -9  -1   5   23.30   16.00
  -9   1   5   76.79   20.40
  -7  -1   5   10.90   12.30
  -7   1   5  -16.20   11.70
  -5  -1   5  480.25   44.20
   5  -1  -5  446.06   44.20
  -5   1   5  441.26   46.50
  -3  -1   5   15.20   10.00
   3  -1  -5   42.80   10.50
   3   1  -5   15.40   10.40
  -3   1   5   25.60   11.20
  -1  -1   5   50.39   10.90
   1  -1  -5   51.09   12.80
  -1   1   5   33.20   12.40
   1   1  -5   66.09   12.50
   1  -1   5  664.23   57.49
  -1  -1  -5  621.34   58.99
   1   1   5  657.83   58.89
  -1   1  -5  650.23   57.89
   3  -1   5   40.10   12.20
  -3  -1  -5   28.80   13.20
  -3   1  -5   54.99   14.00
   3   1   5   36.20   12.90
  -5  -1  -5    0.50   13.10
  -5   1  -5    4.80   13.00
  -7  -1  -5  137.49   28.20
  -7   1  -5  165.48   29.60
  -9  -1  -5  307.67   43.20
  -9   1  -5  211.58   38.40
 -11  -1  -5  144.29   33.00
 -11   1  -5   34.30   28.00
 -13  -1  -5  241.78   48.20
 -13   1  -5  257.57   68.59
 -15  -1  -5   58.09   44.50
 -15   1  -5   82.49   42.70
 -14   2   5   75.19   40.60
 -12   2   5  542.85   63.39
 -10   2   5  855.51   82.89
  -8  -2   5  -21.30   13.10
  -8   2   5  -21.00   16.00
  -6  -2   5  158.68   22.00
   6  -2  -5  142.79   22.40
  -6   2   5  144.69   22.70
   4  -2  -5 4305.57  367.26
  -4  -2   5 4550.04  365.96
   4   2  -5 4671.63  366.66
  -2  -2   5   14.00    9.30
   2  -2  -5   12.10    9.50
   2   2  -5   -1.90    8.70
  -2   2   5    6.40    9.90
   0  -2  -5 4817.02  392.66
   0  -2   5 4949.40  390.06
   0   2  -5 4692.63  390.26
   2  -2   5    8.30    8.20
  -2  -2  -5    6.90    8.90
  -2   2  -5    6.50    8.50
   2   2   5   -8.60   11.40
  -4  -2  -5   22.30   14.50
   4   2   5    8.90   14.40
  -4   2  -5    0.40   10.80
  -6  -2  -5  226.28   34.70
  -6   2  -5  213.98   30.60
  -8  -2  -5  581.74   65.19
  -8   2  -5  595.54   61.69
 -10  -2  -5  735.13   83.49
 -10   2  -5  787.12   78.09
 -12  -2  -5   49.60   43.30
 -12   2  -5    5.00   29.60
 -14  -2  -5  112.39   46.90
 -14   2  -5  102.69   40.20
 -16  -2  -5  182.78   53.79
 -16   2  -5   43.40   45.80
 -13   3   5  168.48   40.60
 -11   3   5  918.01   92.39
  -9  -3   5  333.37   44.90
  -9   3   5  444.36   47.60
  -7  -3   5    7.40   13.40
  -7   3   5   25.60   17.00
   5  -3  -5  109.59   19.60
  -5  -3   5   86.09   15.50
  -5   3   5   98.79   20.80
  -3  -3   5  141.69   20.70
   3  -3  -5  160.68   22.50
  -3   3   5  139.49   22.70
  -1  -3   5   49.00   10.10
   1  -3  -5   63.99   14.70
   1   3  -5   39.30   11.80
  -1   3   5   48.30   13.00
  -1  -3  -5   91.69   18.00
   1  -3   5   99.69   14.50
   1   3   5  149.09   21.60
  -3  -3  -5   18.00   14.40
   3   3   5  -10.60   12.70
  -3   3  -5    3.50    9.00
  -5  -3  -5  441.26   49.60
  -5   3  -5  445.46   45.10
  -7  -3  -5 1161.68  108.79
  -7   3  -5 1211.68  105.19
  -9  -3  -5  197.08   37.70
  -9   3  -5  250.67   36.40
 -11  -3  -5  162.28   40.00
 -11   3  -5  110.39   32.30
 -13  -3  -5   50.29   38.40
 -13   3  -5    5.20   31.00
 -15  -3  -5   -3.00   47.30
 -15   3  -5   35.60   41.30
 -12   4   5  195.98   38.00
 -10   4   5  785.42   81.09
  -8  -4   5   35.80   17.20
  -8   4   5    0.80   19.70
   6  -4  -5 2009.10  172.58
  -6  -4   5 2071.59  170.38
  -6   4   5 2059.99  173.98
   4  -4  -5  113.69   21.70
  -4  -4   5  154.48   19.40
  -4   4   5  111.09   24.20
  -2  -4   5   16.80    8.60
   2  -4  -5    9.30   11.00
  -2   4   5    4.20   12.90
   0  -4   5  156.08   18.20
   0   4  -5  178.38   21.10
  -2  -4  -5 1752.92  149.99
   2   4   5 1774.92  149.09
  -2   4  -5 1740.53  145.89
  -4  -4  -5   74.09   19.70
  -4   4  -5   74.89   15.20
  -6  -4  -5 1114.69  102.89
  -6   4  -5 1108.89   96.99
  -8  -4  -5   31.50   25.60
 -10  -4  -5   35.40   28.40
 -10   4  -5   71.89   25.60
 -12  -4  -5  239.68   50.19
 -12   4  -5  187.78   39.30
 -14  -4  -5   76.69   42.90
 -14   4  -5   89.39   40.50
 -13   5   5  -27.40   40.20
 -11   5   5   17.70   31.10
  -9  -5   5  418.06   49.80
  -9   5   5  375.16   50.99
  -5  -5   5  629.84   58.09
   5  -5  -5  645.84   62.29
  -5   5   5  632.04   65.29
   3  -5  -5  257.97   31.00
  -3  -5   5  166.58   22.50
  -3   5   5  200.78   28.50
   1  -5  -5  167.38   26.90
  -1   5   5  170.28   25.50
  -1  -5  -5  800.22   80.29
   1   5   5  848.52   78.89
  -1   5  -5  897.61   71.59
  -3  -5  -5   62.99   21.40
   3   5   5  147.29   26.40
  -3   5  -5  124.39   16.70
  -5  -5  -5  263.97   37.50
  -5   5  -5  198.08   27.20
  -7  -5  -5   55.39   24.80
  -7   5  -5   65.79   18.70
  -9  -5  -5   64.59   32.10
  -9   5  -5   33.60   23.50
 -11  -5  -5  313.77   55.09
 -11   5  -5  314.87   46.00
 -13  -5  -5  663.43   94.09
 -13   5  -5  620.44   76.39
 -12   6   5  160.08   45.50
 -10  -6   5  250.97   38.80
 -10   6   5  292.67   49.40
  -8  -6   5   -0.10   19.40
  -8   6   5   25.50   26.10
  -6  -6   5  581.74   57.39
  -6   6   5  633.44   65.99
  -4  -6   5  919.81   78.49
   4  -6  -5  962.70   86.59
  -4   6   5  920.81   86.99
   2  -6  -5   14.00   16.20
  -2   6   5   17.80   17.50
   0  -6  -5  941.21   85.99
   0   6   5  899.41   84.69
  -2  -6  -5  394.36   49.90
   2   6   5  361.16   47.70
  -4  -6  -5    6.90   21.80
  -4   6  -5   23.80   10.30
  -6  -6  -5  246.28   38.00
  -6   6  -5  263.67   32.30
  -8  -6  -5  146.19   36.50
  -8   6  -5  120.09   25.10
 -10  -6  -5  265.17   47.50
 -10   6  -5  162.88   34.00
 -12  -6  -5   38.80   43.30
 -12   6  -5   95.69   35.80
 -11  -7   5  701.73   82.79
 -11   7   5  664.33   85.99
  -9  -7   5  327.27   41.70
  -9   7   5  302.77   47.50
  -7  -7   5  -21.20   18.40
  -7   7   5  -70.69   26.30
   5  -7  -5   31.10   21.00
  -5  -7   5    9.90    7.70
  -5  -7   5    4.70   10.40
  -5   7   5   -1.20   22.30
   3  -7  -5  144.49   28.80
  -3   7   5  124.39   27.20
   1  -7  -5   31.80   20.50
  -1   7   5   -7.20   21.60
  -1  -7  -5    2.50   22.10
   1   7   5  -44.80   21.90
  -3  -7  -5   89.79   28.10
  -5  -7  -5  287.77   44.60
  -7  -7  -5  910.61   98.59
  -9  -7  -5  174.28   43.70
  -9   7  -5  153.88   28.00
 -11  -7  -5   90.59   45.40
 -11   7  -5   -6.50   38.50
 -12  -8   5  331.57   49.60
 -10  -8   5  273.87   37.90
 -10   8   5  223.08   49.70
  -8  -8   5   -2.80   19.50
  -8   8   5    5.10   32.60
  -6   8   5  205.98   36.90
   4  -8  -5  561.64   63.49
  -4   8   5  550.84   63.69
   2  -8  -5  -24.40   22.70
  -2   8   5   -4.00   24.60
   0  -8  -5  639.24   69.79
  -2  -8  -5  173.68   36.00
  -4  -8  -5   30.60   30.70
  -6  -8  -5  183.28   44.90
  -8  -8  -5  107.09   47.00
   3  -9  -5   54.59   27.10
  -3   9   5   63.69   42.00
   1  -9  -5    5.20   28.70
  -1  -9  -5  314.87   47.20
  -3  -9  -5   27.00   34.10
  -5  -9  -5   29.10   40.80
 -12   0   6  270.77   41.10
 -10   0   6   50.09   23.60
  -8   0   6  442.36   49.20
  -6   0   6   55.69   15.90
   6   0  -6   89.19   17.90
   4   0  -6    1.30   11.10
   2   0  -6 3683.03  305.77
  -2   0   6 3806.82  306.77
   0   0  -6  449.86   44.60
   2   0   6   92.89   18.30
  -2   0  -6   99.79   17.60
  -4   0  -6  197.78   29.00
   4   0   6  196.18   28.10
  -6   0  -6   71.49   21.40
  -8   0  -6  388.06   51.69
 -10   0  -6  197.78   39.90
 -12   0  -6   19.40   35.50
 -14   0  -6   34.20   42.40
 -13  -1   6   79.39   28.90
 -11  -1   6  176.88   31.10
 -11   1   6  146.29   30.60
  -9  -1   6  -12.60   18.20
  -9   1   6   14.60   19.10
  -7  -1   6    5.60   14.10
   7  -1  -6    0.90   11.90
  -7   1   6   -9.30   13.90
   5  -1  -6    5.20   11.80
  -5   1   6   22.40   13.50
   5   1  -6    4.90   11.20
   3  -1  -6  235.88   29.10
  -3  -1   6  276.17   30.40
   3   1  -6  245.08   29.20
  -3   1   6  266.07   31.60
   1  -1  -6  298.17   33.20
  -1  -1   6  327.97   32.60
   1   1  -6  301.07   31.50
  -1   1   6  262.57   33.50
  -1  -1  -6   17.20   11.70
   1  -1   6   15.50   11.80
  -1   1  -6   24.20   10.90
   1   1   6   13.80   12.70
  -3  -1  -6  -13.50   12.70
   3  -1   6   21.50   12.90
  -3   1  -6    4.20   11.10
   3   1   6   13.40   14.00
  -5  -1  -6   28.80   17.50
  -5   1  -6   31.70   17.50
  -7  -1  -6  222.38   36.30
  -7   1  -6  199.48   32.60
  -9  -1  -6   59.99   29.20
  -9   1  -6   72.49   25.60
 -11  -1  -6   18.10   29.60
 -11   1  -6   12.70   29.80
 -13  -1  -6   18.20   36.30
 -13   1  -6   24.50   35.10
 -15  -1  -6   14.40   47.60
 -15   1  -6   -7.60   43.60
 -12  -2   6  128.89   30.40
 -12   2   6   75.59   31.70
 -10  -2   6   48.90   22.40
 -10   2   6   59.39   24.50
  -8  -2   6  492.85   51.89
  -8   2   6  475.55   52.19
  -6  -2   6  100.59   19.30
   6  -2  -6  121.89   21.60
  -6   2   6  107.29   22.80
   4  -2  -6    3.20   12.40
  -4  -2   6   -2.70   10.90
   4   2  -6    7.60   10.70
  -4   2   6   12.60   13.60
   2  -2  -6    3.60   10.20
  -2  -2   6    5.20   10.70
  -2   2   6   -7.30   12.70
   2   2  -6    9.40    9.00
   0  -2   6   28.10   11.00
   0  -2  -6   14.50   12.60
   0   2  -6   28.80   11.00
   0   2   6   40.40   14.00
   2  -2   6    2.20   10.80
  -2  -2  -6   10.30   12.60
  -2   2  -6    5.20   10.40
   2   2   6    0.40   12.30
  -4  -2  -6  357.46   44.70
   4   2   6  438.76   46.80
  -4   2  -6  397.76   42.40
  -6  -2  -6  423.56   51.69
  -6   2  -6  395.86   46.90
  -8  -2  -6  147.69   33.30
  -8   2  -6   95.99   26.50
 -10  -2  -6   30.20   28.80
 -10   2  -6   65.79   28.40
 -12  -2  -6   40.10   36.60
 -12   2  -6  115.99   39.20
 -14  -2  -6  378.06   65.09
 -14   2  -6  253.67   55.39
 -13  -3   6  491.05   68.39
 -13   3   6  534.75   73.49
 -11  -3   6   25.90   24.30
 -11   3   6    1.30   26.70
  -9  -3   6  150.08   26.90
  -9   3   6   80.89   25.20
  -7  -3   6   45.10   17.70
   7  -3  -6   44.20   18.20
  -7   3   6   46.70   19.30
   5  -3  -6   84.99   19.90
  -5  -3   6   68.19   16.10
  -5   3   6   39.50   17.50
   3  -3  -6  126.59   22.60
  -3   3   6  119.69   23.40
   3   3  -6  189.38   25.30
  -1  -3   6  154.18   21.10
   1  -3  -6  127.09   22.30
   1   3  -6  148.19   21.00
  -1   3   6  193.48   26.10
   1  -3   6   96.59   16.00
  -1  -3  -6  103.19   21.40
   1   3   6   97.29   20.70
  -1   3  -6   94.59   16.10
  -3  -3  -6   48.10   16.60
   3   3   6   11.30   16.30
  -3   3  -6   44.10   12.90
  -5  -3  -6   22.80   19.80
  -5   3  -6   19.40   14.70
  -7  -3  -6   32.50   24.90
  -7   3  -6   -0.30   18.00
  -9  -3  -6  342.77   51.49
  -9   3  -6  337.97   49.30
 -11  -3  -6   74.19   38.00
 -11   3  -6   43.00   28.60
 -13  -3  -6  191.68   55.59
 -13   3  -6  249.88   48.80
 -12  -4   6  320.67   47.20
 -12   4   6  320.37   51.59
 -10  -4   6   38.30   22.70
 -10   4   6   20.10   26.90
  -8  -4   6  124.39   27.70
  -8   4   6  223.58   34.00
   6  -4  -6  -10.00   15.80
  -6  -4   6   17.70   15.40
  -6   4   6    8.20   20.60
   4  -4  -6   48.70   17.70
  -4  -4   6   33.60   14.70
  -4   4   6   13.10   17.20
   2  -4  -6 1718.73  146.79
  -2  -4   6 1728.53  142.19
  -2   4   6 1713.63  147.19
   0  -4   6  414.16   37.10
   0  -4  -6  466.15   46.50
   0   4   6  369.76   44.50
   0   4  -6  295.07   45.60
  -2  -4  -6  -15.00   13.90
   2   4   6   26.70   17.70
  -2   4  -6   12.60   11.90
  -4  -4  -6   76.89   21.80
   4   4   6  122.89   26.60
  -6  -4  -6   42.30   24.40
  -6   4  -6   28.90   17.30
  -8  -4  -6  371.16   54.69
  -8   4  -6  362.26   48.20
 -10  -4  -6  105.29   36.80
 -10   4  -6  125.09   30.80
 -12  -4  -6  -13.60   41.20
 -12   4  -6  -16.50   32.20
 -13  -5   6  -81.79   33.80
 -11  -5   6  238.98   38.50
 -11   5   6  242.88   43.10
  -9  -5   6   11.10   22.60
  -9   5   6   75.29   34.20
  -7  -5   6   25.30   17.90
   7  -5  -6   43.90   19.30
  -7   5   6   22.40   23.50
  -5  -5   6    2.60   13.40
   5  -5  -6    6.10   17.70
  -5   5   6    1.90   21.60
  -3  -5   6  276.67   29.30
   3  -5  -6  282.27   39.70
  -3   5   6  253.27   35.90
   1  -5  -6  291.07   41.70
  -1  -5   6  298.57   28.20
  -1   5   6  300.97   41.00
  -1  -5  -6   -4.00   18.20
   1   5   6   13.30   19.00
  -3  -5  -6   54.49   23.60
  -3   5  -6   63.09   15.80
   3   5   6   55.99   24.10
  -5  -5  -6   93.49   26.60
  -5   5  -6  106.09   21.00
  -7  -5  -6  269.27   44.40
  -7   5  -6  271.87   36.30
  -9  -5  -6   30.50   51.29
  -9   5  -6   35.20   24.20
 -11  -5  -6  -14.60   35.40
 -11   5  -6   62.69   32.70
 -13  -5  -6   58.89   49.10
 -12  -6   6  130.09   38.20
 -12   6   6   88.49   52.39
 -10  -6   6   99.09   29.10
 -10   6   6   95.89   41.80
  -8  -6   6   82.89   23.90
  -8   6   6   24.00   29.50
  -6  -6   6  149.99   24.60
   6  -6  -6  154.28   30.20
  -6   6   6  132.29   31.40
   4  -6  -6   33.10   21.60
  -4  -6   6   30.30   11.80
  -4   6   6   -4.10   21.70
   2  -6  -6  201.08   33.20
  -2   6   6  217.68   32.60
   0  -6  -6  -16.50   18.40
   0   6   6  -12.20   20.50
  -2  -6  -6   37.70   25.70
   2   6   6   65.89   24.60
  -4  -6  -6   50.49   25.40
  -4   6  -6   49.10   17.10
  -6  -6  -6  189.38   39.30
  -6   6  -6  253.47   31.60
  -8   6  -6   48.70   23.50
 -10  -6  -6   25.90   38.50
 -10   6  -6   54.99   31.00
 -11  -7   6  -11.70   34.60
 -11   7   6  -69.29   41.80
  -9  -7   6   26.90   26.10
  -9   7   6  125.09   39.00
  -7  -7   6   14.70   21.00
  -7   7   6   13.20   32.30
   5  -7  -6   35.30   22.40
  -5   7   6   76.79   28.10
   3  -7  -6   70.29   24.70
  -3   7   6   -2.50   24.80
   1  -7  -6   27.40   21.60
  -1   7   6  -25.30   24.10
  -1  -7  -6   76.99   28.40
   1   7   6   37.90   28.00
  -3  -7  -6   50.59   28.70
  -5  -7  -6   17.80   31.00
  -7   7  -6   11.60   23.70
  -9  -7  -6  171.98   44.70
  -9   7  -6   46.70   33.00
 -10   8   6  -79.69   50.69
  -8   8   6  139.79   42.50
  -6   8   6  -26.70   33.90
   4  -8  -6   89.09   29.00
  -4   8   6  104.79   33.70
   2  -8  -6  180.78   36.10
  -2   8   6  191.98   39.00
   0  -8  -6  268.67   41.80
   0   8   6  237.58   42.70
  -2  -8  -6  -34.10   28.70
  -4  -8  -6   81.69   38.50
  -6  -8  -6    5.90   63.49
   3  -9  -6  121.69   33.10
   1  -9  -6  153.58   38.50
  -1  -9  -6   52.09   34.80
  -3  -9  -6   70.09   40.70
 -12   0   7    8.70   26.60
 -10   0   7  -12.60   19.40
  -8   0   7    4.00   16.80
  -6   0   7   41.30   16.90
   6   0  -7   56.19   16.50
  -4   0   7   98.59   19.40
   4   0  -7   54.09   16.10
   2   0  -7   65.59   16.40
  -2   0   7   79.29   19.00
   0   0   7  183.58   26.60
   0   0  -7  196.28   28.10
   2   0   7  -12.10   12.20
  -2   0  -7   -3.90   13.10
   4   0   7   -2.00   17.60
  -4   0  -7   10.60   15.90
  -6   0  -7   18.60   21.30
  -8   0  -7  630.94   71.29
 -10   0  -7   58.29   32.50
 -12   0  -7   72.49   37.20
 -14   0  -7  -69.69   44.80
 -13  -1   7  130.19   36.40
 -11  -1   7   66.29   25.90
 -11   1   7  -30.60   21.50
  -9  -1   7   17.50   17.70
  -9   1   7    9.30   20.10
   7  -1  -7   89.09   21.70
  -7  -1   7   76.49   19.10
  -7   1   7   90.69   20.40
  -5  -1   7   14.60   16.00
   5  -1  -7   21.70   14.40
   5   1  -7   29.30   15.30
  -5   1   7   17.90   15.80
  -3  -1   7   33.30   15.10
   3  -1  -7   12.80   12.00
  -3   1   7   10.40   14.90
   3   1  -7   11.50   10.50
   1  -1  -7   21.60   14.10
  -1  -1   7   -2.80   12.00
  -1   1   7   21.90   14.00
   1   1  -7   25.10   12.30
  -1  -1  -7  109.19   22.80
   1  -1   7  118.49   19.50
  -1   1  -7  126.79   22.50
   1   1   7  128.89   23.60
  -3  -1  -7    9.90   15.70
   3  -1   7    4.30   14.90
   3   1   7   -7.30   15.90
  -3   1  -7    8.80   12.90
  -5  -1  -7   87.59   23.70
  -5   1  -7   86.59   23.90
  -7  -1  -7   82.49   27.60
  -7   1  -7  192.58   33.30
  -9  -1  -7   21.50   26.50
  -9   1  -7    2.20   24.60
 -11  -1  -7   10.00   33.30
 -13  -1  -7   97.29   47.80
 -13   1  -7  116.49   43.70
 -12  -2   7   22.50   23.20
 -12   2   7   11.30   29.20
 -10  -2   7    3.90   22.40
 -10   2   7  -13.40   22.40
   8  -2  -7  345.97   45.40
  -8  -2   7  403.96   46.20
  -8   2   7  422.26   47.10
   6  -2  -7   14.60   15.30
  -6  -2   7   23.50   16.00
  -6   2   7   28.50   19.30
  -4  -2   7   18.00   14.10
   4  -2  -7   22.80   14.90
  -4   2   7    8.40   17.30
   4   2  -7   27.30   14.10
   2  -2  -7   11.40   14.00
   2   2  -7   25.10   11.80
  -2   2   7   12.40   15.70
   0  -2  -7    3.30   12.50
   0  -2   7   21.30   13.90
   0   2  -7   10.70   12.50
   0   2   7   13.00   15.10
   2  -2   7  263.87   35.10
  -2  -2  -7  291.07   39.70
   2   2   7  258.27   35.70
  -2   2  -7  359.16   36.10
  -4  -2  -7  101.19   24.90
  -4   2  -7  107.49   22.20
   4   2   7  128.49   26.80
  -6  -2  -7  192.78   38.40
  -6   2  -7  234.88   33.60
  -8  -2  -7   60.49   29.40
  -8   2  -7   38.70   25.10
 -10  -2  -7  111.19   44.60
 -10   2  -7   59.29   32.10
 -12  -2  -7   23.40   36.40
 -12   2  -7   50.39   38.10
 -14  -2  -7  -21.00   51.39
 -14   2  -7   99.39   43.10
 -13  -3   7  104.09   34.00
 -11  -3   7   20.50   26.90
 -11   3   7   -8.90   29.90
  -9  -3   7   50.29   22.50
  -9   3   7   49.60   25.40
  -7  -3   7    9.20   15.60
   7  -3  -7   -0.20   16.90
  -7   3   7   44.80   22.40
   5  -3  -7  208.78   33.00
  -5  -3   7  196.18   28.80
  -5   3   7  219.28   33.80
  -3  -3   7  104.79   20.80
   3  -3  -7  112.69   22.70
   3   3  -7  128.59   21.80
  -3   3   7  105.79   24.40
   1  -3  -7  190.18   28.90
  -1  -3   7  142.89   21.90
   1   3  -7  155.28   22.40
  -1   3   7  142.59   27.10
  -1  -3  -7   37.60   19.70
  -1   3  -7   35.40   13.60
   1   3   7   42.20   18.20
  -3  -3  -7   63.69   21.50
  -3   3  -7   84.49   18.80
   3   3   7   68.49   24.40
  -5  -3  -7   -1.80   18.40
  -5   3  -7  -19.30   15.50
  -7  -3  -7    3.50   25.00
  -7   3  -7   61.69   24.30
  -9   3  -7   71.79   28.90
 -11  -3  -7   22.50   39.10
 -11   3  -7   60.39   33.20
 -13  -3  -7  323.07   64.99
 -13   3  -7  206.18   52.09
 -12  -4   7    6.90   28.50
 -12   4   7    3.90   35.30
 -10  -4   7  -11.20   24.30
 -10   4   7   19.30   28.30
  -8  -4   7   49.20   20.90
   8  -4  -7   39.30   23.00
  -8   4   7   39.20   27.70
   6  -4  -7  -14.50   16.60
  -6  -4   7    5.60   16.60
  -6   4   7    6.40   20.20
   4  -4  -7   23.30   18.30
  -4  -4   7   30.60   16.20
  -4   4   7   14.90   19.20
   2  -4  -7   62.19   19.00
  -2  -4   7    8.80   11.60
  -2   4   7   17.40   18.10
   2   4  -7   -8.10   15.80
   0  -4   7   35.50   12.20
   0  -4  -7   35.90   18.80
   0   4  -7   54.79   14.60
   0   4   7   21.40   17.90
  -2  -4  -7   60.29   23.50
  -2   4  -7   36.80   14.60
   2   4   7   30.60   21.00
  -4  -4  -7    7.20   20.30
  -4   4  -7    1.00   16.00
   4   4   7   26.30   25.70
  -6  -4  -7   26.10   24.00
  -6   4  -7  -22.30   18.30
  -8  -4  -7  144.69   39.80
  -8   4  -7  284.27   38.40
 -10  -4  -7  -66.79   34.90
 -10   4  -7   64.79   30.70
 -12  -4  -7  -34.20   41.10
 -13  -5   7  150.08   41.50
 -11  -5   7   62.09   31.60
 -11   5   7   29.80   41.00
  -9  -5   7   17.90   22.60
  -9   5   7   70.99   31.70
  -7  -5   7  181.18   28.30
   7  -5  -7  116.59   28.30
  -7   5   7  161.18   35.20
   5  -5  -7    3.20   18.70
  -5  -5   7    8.00   16.90
  -5   5   7   28.20   25.40
   3  -5  -7   75.89   23.40
  -3   5   7   79.49   24.20
   1  -5  -7    5.50   18.10
  -1  -5   7    7.10   10.50
   1   5  -7  -22.40   29.30
  -1   5   7   12.20   21.90
  -1  -5  -7  176.48   32.10
  -1   5  -7  144.19   24.20
   1   5   7  120.59   29.40
  -3  -5  -7   29.30   25.40
   3   5   7   55.09   27.50
  -3   5  -7   32.90   15.80
  -5  -5  -7  224.48   41.20
  -5   5  -7  189.08   29.40
  -7  -5  -7  117.59   34.00
  -7   5  -7   97.79   27.40
  -9  -5  -7  -28.10   34.70
  -9   5  -7   60.59   27.80
 -11  -5  -7   -9.60   45.60
 -11   5  -7   43.20   36.80
 -12  -6   7  -48.20   36.40
 -10  -6   7   -3.50   27.30
 -10   6   7   34.70   39.40
  -8  -6   7   71.99   26.10
  -8   6   7  -12.60   34.60
  -6  -6   7   26.60   19.50
   6  -6  -7   -8.90   21.70
  -6   6   7   24.40   30.00
  -4  -6   7   41.80   13.00
   4  -6  -7   51.89   22.90
  -4   6   7   15.60   25.60
   2  -6  -7   35.10   21.70
  -2   6   7   44.90   25.90
   0  -6  -7   50.19   24.30
   0   6   7   25.30   25.60
  -2  -6  -7  -22.40   23.50
   2   6   7  -26.70   28.80
  -2   6  -7   -1.00   17.10
  -4  -6  -7   19.90   27.50
  -4   6  -7   45.80   18.50
  -6  -6  -7  -26.30   33.20
  -6   6  -7   16.70   21.90
  -8  -6  -7  142.69   44.30
  -8   6  -7  189.28   38.50
 -10  -6  -7   61.39   43.70
 -10   6  -7   73.99   33.90
  -9  -7   7  -71.89   28.60
  -9   7   7    0.10   43.80
  -7  -7   7   21.50   22.00
  -7   7   7   41.10   37.40
   5  -7  -7  116.29   30.50
  -5  -7   7  128.69   16.90
  -5   7   7  193.98   39.40
   3  -7  -7   61.39   27.20
  -3   7   7   56.39   32.30
   1  -7  -7   98.49   28.60
  -1   7   7  113.49   34.90
  -1  -7  -7    1.90   27.00
   1   7   7   83.99   34.20
  -3  -7  -7   27.10   33.20
  -5  -7  -7  -49.90   39.10
  -7  -7  -7  -13.20   39.20
  -7   7  -7   12.20   23.20
  -9  -7  -7   -4.00   45.00
  -8   8   7   30.30   45.20
   6  -8  -7   71.59   31.90
  -6   8   7  -39.30   39.50
   4  -8  -7   -1.90   29.00
  -4   8   7   14.30   36.40
   2  -8  -7  -48.00   27.60
  -2   8   7   58.79   37.10
   0  -8  -7   31.40   30.30
   0   8   7  -12.10   38.40
  -2  -8  -7  191.48   43.00
  -6  -8  -7   37.00   43.90
   5  -9  -7   32.60   33.70
   3  -9  -7   21.00   34.60
   1  -9  -7   24.70   36.90
  -1  -9  -7   57.19   40.50
 -12   0   8  -24.00   26.90
 -10   0   8 2646.54  223.98
  -8   0   8   51.49   20.10
   6   0  -8 1171.28  104.39
  -6   0   8 1141.59  103.69
   4   0  -8   39.00   15.00
  -4   0   8   66.59   21.70
  -2   0   8   22.40   15.80
   2   0  -8   21.20   14.50
   0   0   8  877.71   79.79
   0   0  -8  837.12   79.89
  -2   0  -8   30.40   17.80
   2   0   8   45.90   18.90
  -4   0  -8 2918.61  239.08
   4   0   8 2744.03  237.08
  -6   0  -8  126.09   29.00
  -8   0  -8   23.80   27.00
 -10   0  -8   24.10   34.50
 -12   0  -8  324.87   59.59
 -13  -1   8  -23.20   34.20
 -11  -1   8  -21.90   27.10
 -11   1   8    8.80   26.30
  -9  -1   8   39.80   23.90
  -9   1   8   66.19   23.80
   7  -1  -8   -2.20   17.70
  -7  -1   8   23.00   18.70
  -7   1   8   29.50   20.00
   7   1  -8   30.80   18.60
  -5  -1   8   31.70   19.00
   5  -1  -8   21.20   16.20
   5   1  -8   45.00   18.30
  -5   1   8   53.49   19.90
  -3  -1   8    7.90   16.40
   3  -1  -8   21.40   13.70
   3   1  -8   23.30   13.50
  -3   1   8   -8.90   16.50
   1  -1  -8   71.69   20.20
  -1  -1   8   68.99   18.30
  -1   1   8   63.19   19.90
   1   1  -8   97.79   18.30
  -1  -1  -8    6.10   15.90
   1  -1   8   16.50   14.90
  -1   1  -8   -6.00   13.80
   1   1   8  -13.30   17.00
   3  -1   8  120.89   23.00
  -3  -1  -8   89.89   24.00
  -3   1  -8   94.39   23.50
   3   1   8   98.89   26.10
  -5  -1  -8   33.10   22.40
  -5   1  -8   25.30   18.20
  -7  -1  -8   38.80   26.80
  -7   1  -8  -33.20   20.40
  -9   1  -8   24.40   28.80
 -11  -1  -8  -26.90   40.20
 -11   1  -8   78.69   35.90
 -13  -1  -8   98.39   51.19
 -13   1  -8  -15.60   41.60
 -12   2   8  468.85   65.59
 -10  -2   8  -19.80   23.80
 -10   2   8  -21.20   24.90
   8  -2  -8  -16.00   19.20
  -8  -2   8   14.40   20.50
  -8   2   8   50.39   23.60
  -6  -2   8   12.20   17.90
   6  -2  -8   35.40   21.30
   6   2  -8   24.20   18.20
  -6   2   8   18.80   20.10
  -4  -2   8  272.77   37.20
   4  -2  -8  183.78   31.90
  -4   2   8  311.87   41.00
   4   2  -8  275.97   37.60
  -2  -2   8  365.56   39.70
   2  -2  -8  310.77   41.60
  -2   2   8  389.16   44.50
   2   2  -8  306.87   38.40
   0  -2   8   44.10   17.00
   0  -2  -8   46.50   21.00
   0   2   8  101.69   23.90
   0   2  -8   76.29   17.50
  -2  -2  -8   44.30   20.10
   2  -2   8    7.50   15.90
   2   2   8   36.10   20.90
  -2   2  -8   22.00   17.50
  -4  -2  -8   18.10   21.90
   4   2   8   41.30   22.50
  -4   2  -8   22.80   17.90
  -6  -2  -8  771.52   82.09
  -6   2  -8  754.02   77.49
  -8  -2  -8  -16.60   28.30
  -8   2  -8  -33.00   24.30
 -10  -2  -8 1123.19  117.89
 -10   2  -8 1064.39  111.89
 -12  -2  -8   31.20   43.50
 -12   2  -8    2.40   36.90
 -13  -3   8  -22.90   33.70
 -11   3   8  145.39   39.10
  -9  -3   8   92.99   27.20
  -9   3   8   95.29   32.80
   7  -3  -8  630.44   65.49
  -7  -3   8  655.73   63.29
  -7   3   8  535.65   66.89
   5  -3  -8  316.77   45.60
  -5  -3   8  369.96   45.10
  -5   3   8  323.47   47.70
   5   3  -8  416.76   44.70
  -3  -3   8   61.99   19.30
   3  -3  -8   55.29   18.10
   3   3  -8   50.99   18.70
  -3   3   8   35.00   22.30
   1  -3  -8  269.87   38.90
  -1  -3   8  235.28   34.60
   1   3  -8  275.07   33.60
  -1   3   8  309.87   42.40
  -1  -3  -8  533.55   60.19
   1  -3   8  489.85   51.79
   1   3   8  536.05   58.39
  -1   3  -8  526.05   52.99
  -3  -3  -8   12.50   19.60
  -3   3  -8   65.89   21.10
   3   3   8   25.20   24.80
  -5  -3  -8  146.49   33.10
  -5   3  -8  131.29   28.60
  -7  -3  -8  101.99   32.60
  -7   3  -8  144.59   31.60
  -9  -3  -8  -23.30   31.80
  -9   3  -8   92.29   30.80
 -11  -3  -8  -32.50   39.90
 -11   3  -8   77.19   37.40
 -12  -4   8  -13.20   33.50
 -10  -4   8 1399.16  124.69
 -10   4   8 1321.17  130.59
   8  -4  -8   35.20   21.50
  -8  -4   8   14.30   22.80
  -8   4   8    8.20   28.70
   6  -4  -8  596.74   68.69
  -6  -4   8  788.02   67.79
  -6   4   8  528.65   72.49
   4  -4  -8   13.50   18.70
  -4  -4   8  -12.20   17.20
  -4   4   8  -24.70   22.10
   2  -4  -8   -6.40   16.40
  -2   4   8   10.30   21.90
   2   4  -8   -0.40   17.60
   0  -4  -8  399.26   51.29
   0   4   8  358.66   50.29
   0   4  -8  392.36   42.90
  -2  -4  -8   11.80   22.50
  -2   4  -8   70.69   17.90
   2   4   8    2.40   24.20
  -4  -4  -8 1261.07  122.49
  -4   4  -8 1283.57  115.99
   4   4   8 1359.96  122.09
  -6  -4  -8   -5.50   28.50
  -6   4  -8   14.10   22.20
  -8  -4  -8   36.00   35.00
  -8   4  -8   39.20   27.20
 -10  -4  -8  -15.50   37.70
 -10   4  -8  -71.69   32.40
 -13  -5   8  -52.19   61.99
 -11  -5   8   13.00   30.50
  -9  -5   8  -38.40   23.60
  -9   5   8   65.59   37.30
  -7  -5   8  101.39   27.50
   7  -5  -8  131.09   30.40
  -7   5   8   89.29   34.70
   5  -5  -8  443.56   59.49
  -5   5   8  527.15   63.29
   3  -5  -8   -9.30   18.10
  -3  -5   8    4.90   14.20
  -3   5   8  -22.60   25.30
  -1  -5   8  407.36   42.80
   1  -5  -8  460.25   55.49
  -1   5   8  384.66   57.19
   1   5  -8  453.65   48.90
  -1  -5  -8  117.89   30.50
   1   5   8  138.89   35.90
  -3  -5  -8   89.79   30.70
  -3   5  -8   85.59   22.30
   3   5   8   16.00   47.30
  -5  -5  -8  -31.10   28.10
  -5   5  -8  -10.50   23.50
  -7  -5  -8  -35.10   32.00
  -7   5  -8    8.70   30.40
  -9  -5  -8   45.50   38.60
  -9   5  -8   25.10   32.30
 -12  -6   8   53.79   37.90
 -10  -6   8  213.78   38.00
  -8  -6   8  -14.20   24.90
   8  -6  -8   40.20   28.20
  -8   6   8   21.00   42.60
   6  -6  -8  143.59   33.80
  -6   6   8  137.59   39.90
   4  -6  -8   17.30   25.70
  -4  -6   8   18.90   14.30
  -4   6   8   49.40   32.10
  -2  -6   8   45.70   13.40
   2  -6  -8   59.19   25.70
  -2   6   8   84.29   32.60
   0  -6  -8  109.49   30.90
   0   6   8  180.28   39.70
  -2  -6  -8   -0.10   29.10
  -2   6  -8   18.20   26.10
  -4  -6  -8  201.58   43.20
  -4   6  -8  243.68   32.10
  -6  -6  -8  135.29   43.10
  -6   6  -8  179.68   33.10
  -8  -6  -8  -73.49   42.60
  -8   6  -8   27.90   36.20
   7  -7  -8  484.45   64.89
  -7  -7   8  411.56   54.89
  -7   7   8  314.77   60.79
   5  -7  -8  432.66   55.09
  -5  -7   8  352.06   38.30
  -5   7   8  368.36   55.19
   3  -7  -8   36.40   28.70
  -3   7   8  -50.09   36.30
   1  -7  -8  227.78   41.90
  -1   7   8  322.07   72.59
  -1  -7  -8  430.56   59.79
  -3  -7  -8   -9.90   39.20
  -5  -7  -8   95.69   43.60
  -7  -7  -8  118.49   49.60
   6  -8  -8   72.49   35.00
   4  -8  -8  -10.30   32.00
   2  -8  -8   97.29   37.80
   0  -8  -8   87.69   36.30
  -2  -8  -8   65.69   59.39
  -4  -8  -8   39.00   41.90
   5  -9  -8  182.18   46.00
   3  -9  -8  -29.90   37.60
   1  -9  -8   64.49   48.70
 -10   0   9    3.90   26.10
  -8   0   9   22.70   22.50
   8   0  -9   27.40   21.00
  -6   0   9   21.90   21.80
   6   0  -9   23.80   18.90
  -4   0   9   88.39   23.30
   4   0  -9   66.89   19.60
  -2   0   9   78.59   21.90
   2   0  -9   76.69   19.30
   0   0  -9   29.70   18.90
   0   0   9   38.50   21.60
  -2   0  -9   11.20   19.50
   2   0   9   -6.60   20.40
   4   0   9   13.10   25.80
  -4   0  -9   39.10   22.50
  -6   0  -9   12.00   24.00
  -8   0  -9  294.87   53.69
 -10   0  -9  152.38   43.30
 -12   0  -9  158.98   55.09
 -11  -1   9   47.80   30.20
  -9  -1   9   65.29   26.30
  -9   1   9    6.50   23.30
  -7  -1   9  199.38   34.50
   7  -1  -9  215.08   35.40
   7   1  -9  318.77   40.10
  -7   1   9  219.98   35.90
  -5  -1   9   -0.60   18.10
   5  -1  -9   14.80   18.30
   5   1  -9   24.20   19.40
  -5   1   9   30.10   21.80
   3  -1  -9    4.40   13.60
  -3  -1   9    3.60   19.30
  -3   1   9   36.30   21.50
   3   1  -9    3.30   15.60
   1  -1  -9   31.80   18.90
  -1  -1   9   52.59   20.60
   1   1  -9   43.80   18.30
  -1   1   9   15.50   19.00
  -1  -1  -9  119.19   26.90
   1  -1   9   90.69   24.40
  -1   1  -9   84.69   25.30
   1   1   9   89.79   26.90
   3  -1   9   66.09   23.00
  -3   1  -9    5.80   21.00
  -5  -1  -9   34.20   26.50
  -5   1  -9   58.29   24.60
  -7  -1  -9    7.70   29.30
  -7   1  -9   20.70   29.70
  -9  -1  -9   -9.80   35.60
  -9   1  -9   38.80   37.50
 -11  -1  -9   -2.40   46.40
 -11   1  -9   14.70   40.20
 -12  -2   9   40.30   33.50
 -10  -2   9   27.50   27.60
 -10   2   9  -56.69   43.50
   8  -2  -9  262.47   38.80
  -8   2   9  271.17   42.60
  -6  -2   9  500.05   57.09
   6  -2  -9  491.75   56.09
  -6   2   9  504.45   59.39
   6   2  -9  424.36   55.29
   4  -2  -9   33.10   19.20
  -4  -2   9   24.50   20.00
  -4   2   9   25.40   21.70
   4   2  -9    3.10   18.70
  -2  -2   9    1.90   16.20
   2  -2  -9   -3.30   19.80
  -2   2   9   12.40   19.70
   2   2  -9    7.70   14.80
   0  -2  -9  333.07   46.40
   0  -2   9  301.47   41.00
   0   2   9  302.97   42.50
   0   2  -9  342.37   42.40
   2  -2   9  744.53   67.59
  -2  -2  -9  626.84   70.79
  -2   2  -9  623.84   68.59
  -4  -2  -9  168.58   37.70
  -4   2  -9  164.38   33.10
  -6  -2  -9   40.20   28.90
  -6   2  -9  -16.60   23.70
  -8  -2  -9  -59.19   33.00
  -8   2  -9  -16.20   29.80
 -10  -2  -9    5.60   40.80
 -10   2  -9   53.39   37.00
 -12  -2  -9   26.50   51.09
 -12   2  -9  166.68   49.99
 -11  -3   9  -35.70   29.60
  -9  -3   9   64.49   28.10
   9  -3  -9   11.90   24.10
  -9   3   9   -4.50   28.30
  -7  -3   9  348.47   52.89
   7  -3  -9  415.26   54.29
  -7   3   9  433.96   54.99
  -5  -3   9   35.70   22.20
   5  -3  -9  -28.10   19.40
   5   3  -9   25.40   21.50
  -5   3   9   31.90   24.40
   3  -3  -9   32.90   20.20
  -3  -3   9  -11.40   17.20
  -3   3   9  -20.40   23.40
   3   3  -9  -14.30   19.50
  -1  -3   9   13.20   18.00
   1  -3  -9   14.30   21.30
   1   3  -9   29.50   17.30
  -1   3   9   18.30   23.60
   1  -3   9  354.86   43.70
  -1  -3  -9  359.96   51.59
  -1   3  -9  362.46   46.30
  -3  -3  -9   -8.10   23.70
  -3   3  -9   28.50   22.10
  -5  -3  -9  -13.90   30.70
  -5   3  -9  -21.00   24.00
  -7  -3  -9   82.79   36.50
  -7   3  -9   -4.90   28.00
  -9  -3  -9   20.80   39.60
  -9   3  -9  -22.70   32.30
 -11  -3  -9  113.39   51.09
 -11   3  -9  -16.40   42.30
 -12  -4   9  110.79   40.00
 -10  -4   9  -18.60   30.90
   8  -4  -9   16.80   25.60
  -8  -4   9   15.20   25.60
   6  -4  -9   24.20   23.70
  -6  -4   9  -12.80   22.80
  -6   4   9   40.30   30.10
  -4  -4   9  168.78   27.50
   4  -4  -9   72.59   26.60
   4   4  -9   98.59   26.40
  -4   4   9   88.99   33.70
   2  -4  -9   41.30   23.00
  -2  -4   9   37.80   17.90
   2   4  -9   68.59   25.00
  -2   4   9   64.39   28.30
   0  -4   9   62.09   17.50
   0  -4  -9   55.99   23.60
   0   4   9   27.20   26.20
   0   4  -9   20.70   18.30
  -2  -4  -9    5.60   27.60
  -2   4  -9   61.59   21.60
   2   4   9   51.19   50.49
  -4  -4  -9   53.09   29.80
  -4   4  -9   10.80   24.70
  -6  -4  -9   66.09   37.60
  -6   4  -9    0.70   28.80
  -8  -4  -9   66.69   39.10
  -8   4  -9   43.80   35.10
 -10  -4  -9   75.39   50.99
 -11  -5   9   12.90   32.10
  -9  -5   9  -25.30   32.80
   9  -5  -9   47.10   31.10
  -7  -5   9   93.59   28.80
   7  -5  -9   71.79   27.80
  -7   5   9   70.99   38.60
  -5  -5   9   20.80   23.50
   5  -5  -9   44.80   26.60
  -5   5   9   41.80   34.40
   3  -5  -9   -0.30   24.00
  -3   5   9   60.39   34.30
   1  -5  -9   73.39   26.10
  -1  -5   9   32.30   19.30
   1   5  -9   53.79   25.20
  -1   5   9   -0.40   32.60
  -1  -5  -9   -4.80   29.10
  -1   5  -9    0.50   19.80
  -3  -5  -9   -9.50   29.10
  -3   5  -9  -20.20   22.00
  -5  -5  -9  -24.50   31.70
  -5   5  -9   21.60   27.00
  -7  -5  -9   66.09   41.60
  -7   5  -9  110.79   37.40
  -9   5  -9  -28.30   42.30
 -12  -6   9  107.09   45.40
 -10  -6   9   47.00   39.80
  -8  -6   9    2.80   29.20
   8  -6  -9   74.89   34.00
  -6  -6   9  261.67   37.50
   6  -6  -9  271.47   47.30
   4  -6  -9   26.40   29.50
  -4  -6   9   32.10   18.10
  -2  -6   9   18.60   15.70
   2  -6  -9   -6.90   27.70
   0  -6  -9  203.28   40.80
   0   6  -9  221.38   33.90
  -2  -6  -9  164.28   40.70
  -2   6  -9  227.78   34.00
  -4  -6  -9   47.30   38.30
  -4   6  -9  135.39   28.20
  -6  -6  -9  -35.40   40.60
  -6   6  -9   12.60   30.80
  -8  -6  -9   54.19   49.70
  -8   6  -9   46.30   41.40
   7  -7  -9  276.77   50.59
   5  -7  -9   84.79   35.10
   3  -7  -9   15.00   32.00
   1  -7  -9  -27.10   30.20
  -1  -7  -9  164.78   75.79
  -3  -7  -9   38.10   40.90
  -5  -7  -9    3.70   44.90
   6  -8  -9   57.59   51.89
   4  -8  -9   19.10   40.50
   0  -8  -9   51.79   39.10
  -2  -8  -9   63.49   43.60
 -10   0  10    1.80   27.50
   8   0 -10  240.48   38.20
  -8   0  10  206.28   36.50
   6   0 -10   13.90   22.90
  -6   0  10   37.00   27.60
  -4   0  10 3528.65  296.87
   4   0 -10 3570.34  295.77
   2   0 -10  140.59   25.80
  -2   0  10  108.49   28.30
   0   0  10  551.14   60.59
   0   0 -10  460.25   57.09
   2   0  10  -23.80   24.50
  -2   0 -10   13.20   24.30
   4   0  10  595.94   71.89
  -4   0 -10  545.65   70.69
  -6   0 -10  115.29   37.60
  -8   0 -10  192.58   46.60
 -10   0 -10  402.76   66.29
 -11  -1  10  162.68   38.10
  -9  -1  10  142.39   33.30
   9  -1 -10  130.99   31.10
   7  -1 -10   10.00   20.40
  -7  -1  10   42.10   26.20
   7   1 -10   34.80   22.80
  -7   1  10   35.10   28.60
   5  -1 -10  132.39   29.60
  -5  -1  10  172.08   33.60
   5   1 -10  154.88   31.50
  -5   1  10  135.19   30.80
  -3  -1  10  102.49   26.70
   3  -1 -10   93.79   26.00
   3   1 -10  150.98   26.30
  -3   1  10  200.38   34.90
  -1  -1  10   40.40   21.30
   1  -1 -10  -17.80   20.20
  -1   1  10   24.00   24.10
   1   1 -10   13.40   19.80
   1  -1  10  122.09   29.00
  -1  -1 -10  123.19   31.70
   1   1  10   69.19   26.20
  -1   1 -10   85.69   27.50
   3  -1  10  231.38   40.80
  -3  -1 -10  155.28   36.90
   3   1  10  263.57   42.30
  -3   1 -10  222.78   39.90
  -5  -1 -10   -5.10   28.80
  -5   1 -10    7.70   28.20
  -7  -1 -10   41.80   36.90
  -7   1 -10  168.98   43.10
  -9  -1 -10  161.28   46.80
  -9   1 -10  219.88   48.10
 -11  -1 -10   10.20   49.50
 -11   1 -10  -87.09   45.20
 -10  -2  10 1110.69  108.09
   8  -2 -10   30.80   23.00
  -8  -2  10   33.80   27.30
   6  -2 -10  278.97   43.50
  -6  -2  10  248.58   40.20
   6   2 -10  325.37   44.10
   4  -2 -10  106.89   26.20
  -4  -2  10  159.48   31.40
   4   2 -10   92.39   26.90
   2  -2 -10  336.77   45.60
  -2  -2  10  234.38   36.20
   2   2 -10  284.07   38.50
   0  -2  10    7.30   22.10
   0  -2 -10   -5.90   22.00
   0   2 -10   28.20   21.30
   2  -2  10 1122.39  106.99
  -2  -2 -10 1139.29  113.19
  -2   2 -10 1188.98  108.79
  -4  -2 -10   32.90   31.10
  -4   2 -10   35.30   28.00
  -6  -2 -10   54.79   39.00
  -6   2 -10  118.99   35.20
  -8  -2 -10   60.29   39.10
  -8   2 -10   78.29   49.20
 -10  -2 -10   98.29   48.10
 -10   2 -10  146.99   47.10
 -11  -3  10    5.20   39.00
  -9  -3  10  478.55   61.49
   9  -3 -10  528.35   64.79
  -7  -3  10  102.39   31.50
   7  -3 -10  112.89   29.30
  -7   3  10  126.99   39.40
   5  -3 -10   79.39   26.10
  -5  -3  10   57.29   28.10
  -5   3  10   34.80   33.60
   5   3 -10   72.79   28.00
  -3  -3  10  112.99   25.00
   3  -3 -10   62.19   23.60
   3   3 -10   87.29   27.50
  -3   3  10   69.09   29.10
  -1  -3  10  288.57   37.70
   1  -3 -10  230.88   41.40
   1   3 -10  310.77   43.00
  -1  -3 -10  629.84   70.09
   1  -3  10  480.15   58.79
  -1   3 -10  523.75   60.59
  -3  -3 -10  106.99   38.90
  -3   3 -10   66.59   26.50
  -5  -3 -10  130.99   42.90
  -5   3 -10   34.90   30.40
  -7  -3 -10   45.80   39.30
  -7   3 -10   69.09   37.50
  -9  -3 -10  278.27   62.49
  -9   3 -10  494.45   67.69
 -10  -4  10   80.19   40.10
  -8  -4  10  105.99   32.60
   8  -4 -10   95.89   31.80
   6  -4 -10   14.40   24.20
  -6  -4  10   15.50   27.10
  -6   4  10   27.30   38.90
  -4  -4  10 1717.63  151.58
   4  -4 -10 1727.83  157.08
  -4   4  10 1867.51  161.68
   4   4 -10 1747.23  155.48
   2  -4 -10   26.10   25.10
  -2  -4  10   44.10   20.60
   2   4 -10  100.79   29.70
  -2   4  10   13.10   50.49
   0  -4  10  254.57   35.90
   0  -4 -10  286.27   46.20
   0   4 -10  248.18   36.90
  -2  -4 -10  128.99   34.10
  -2   4 -10   34.90   26.20
  -4  -4 -10  229.08   51.89
  -4   4 -10  253.57   42.00
  -6  -4 -10   14.10   42.10
  -6   4 -10   22.70   33.90
  -8  -4 -10  103.39   49.40
  -8   4 -10  100.99   44.20
 -11  -5  10  246.68   52.79
  -9  -5  10   23.90   33.20
   9  -5 -10   -1.60   32.20
  -7  -5  10   47.40   31.30
   7  -5 -10  135.69   35.60
  -5  -5  10  128.19   27.10
  -3  -5  10  115.39   25.50
   3  -5 -10  167.58   37.20
   3   5 -10  113.99   33.60
  -1  -5  10   58.09   21.50
   1  -5 -10   28.10   29.10
   1   5 -10  118.29   32.60
  -1  -5 -10    3.10   31.70
  -1   5 -10   28.00   24.80
  -3  -5 -10  126.79   43.20
  -3   5 -10  208.28   36.90
  -5  -5 -10   54.29   45.70
  -5   5 -10   80.79   35.80
  -7  -5 -10  414.36   70.19
  -7   5 -10  368.06   60.59
 -10  -6  10  178.38   48.40
  -8  -6  10    0.60   33.30
   6  -6 -10  -41.60   29.20
  -6  -6  10   35.50   27.60
   4  -6 -10  401.16   57.39
  -4  -6  10  430.66   50.09
   2  -6 -10   -9.00   27.90
   0  -6 -10   40.50   37.50
   0   6 -10   47.60   29.10
  -2  -6 -10  323.57   57.49
  -2   6 -10  382.96   48.50
  -4  -6 -10  -66.19   40.80
  -4   6 -10   53.59   29.80
  -6  -6 -10   38.70   48.40
  -6   6 -10   44.30   37.70
   7  -7 -10   59.29   39.50
   5  -7 -10   14.40   38.80
   3  -7 -10   16.20   36.80
   1  -7 -10  178.08   45.60
  -1  -7 -10  324.97   57.99
  -3  -7 -10   27.50   43.30
   6  -8 -10   15.70   40.80
   4  -8 -10  178.58   46.70
   2  -8 -10   24.00   44.10
  -8   0  11  487.15   71.39
   8   0 -11  524.15   65.69
   6   0 -11   22.80   24.70
  -6   0  11  -33.00   31.80
  -4   0  11   32.60   30.60
   4   0 -11   33.00   22.10
  -2   0  11   27.00   28.10
   2   0 -11   42.70   21.90
   0   0 -11  393.26   52.09
   0   0  11  307.27   49.60
  -2   0 -11   44.60   28.70
  -4   0 -11  531.95   74.69
  -6   0 -11   52.79   38.70
  -8   0 -11   23.50   41.10
  -9  -1  11  -35.80   33.40
   9  -1 -11   31.10   25.70
   7  -1 -11  105.19   29.30
  -7  -1  11   90.09   31.80
   7   1 -11   62.09   27.70
  -7   1  11  -36.90   31.50
  -5  -1  11   34.80   30.70
   5  -1 -11   -5.70   24.80
   5   1 -11   57.59   26.70
  -5   1  11   28.20   31.20
  -3  -1  11   30.60   28.00
   3  -1 -11   43.90   22.50
  -3   1  11   40.10   32.50
   3   1 -11   55.59   24.70
   1  -1 -11   46.30   25.70
  -1  -1  11   52.79   29.10
  -1   1  11   59.09   32.90
   1   1 -11   20.60   23.20
  -1  -1 -11   54.69   28.50
   1  -1  11   30.50   30.00
  -1   1 -11   45.70   25.70
  -3  -1 -11  -17.60   29.70
  -3   1 -11   10.60   30.70
  -5  -1 -11   76.79   37.00
  -5   1 -11    3.20   33.00
  -7  -1 -11  104.79   49.70
  -7   1 -11   93.79   42.90
  -9  -1 -11   14.50   50.79
  -9   1 -11   70.29   48.80
 -10  -2  11  -12.30   35.40
  10  -2 -11  -41.60   27.20
  -8  -2  11   20.30   32.40
   8  -2 -11   26.90   30.20
  -6  -2  11  853.21   90.59
   6  -2 -11  825.12   87.49
   6   2 -11  856.21   88.29
   4  -2 -11   -1.40   24.80
  -4  -2  11   -1.10   27.80
   4   2 -11   33.70   25.60
  -2  -2  11  650.43   77.89
   2  -2 -11  848.12   80.99
   2   2 -11  723.33   76.59
   0  -2  11  -37.00   25.60
   0  -2 -11   25.30   26.60
   0   2 -11    5.30   24.20
   2  -2  11   59.69   30.20
  -2  -2 -11  -12.30   29.00
  -2   2 -11   -2.10   25.70
  -4  -2 -11   -6.80   34.60
  -4   2 -11  -37.70   32.90
  -6  -2 -11  -49.70   40.80
  -8  -2 -11   53.99   53.09
  -8   2 -11  102.79   47.00
   9  -3 -11  -36.50   29.30
  -9  -3  11  -40.50   34.00
   7  -3 -11  181.78   38.00
  -7  -3  11  172.38   40.80
   5  -3 -11    2.10   26.00
  -5  -3  11   10.70   28.70
   5   3 -11  -11.50   27.10
  -3  -3  11  -38.90   23.60
   3  -3 -11   50.69   28.10
   3   3 -11   16.70   27.50
   1  -3 -11  128.39   34.50
  -1  -3  11  185.08   32.20
   1   3 -11  170.68   31.90
   1  -3  11  -17.10   26.80
  -1  -3 -11    0.00   32.20
  -1   3 -11  -15.90   24.10
  -3  -3 -11   66.09   37.20
  -3   3 -11  140.99   36.30
  -5  -3 -11    6.30   43.10
  -5   3 -11   37.80   37.90
  -7  -3 -11  156.78   49.60
  -7   3 -11  139.99   51.69
 -10  -4  11   14.80   41.10
  10  -4 -11    3.20   33.80
   8  -4 -11  236.78   44.60
  -8  -4  11  178.28   41.60
   6  -4 -11   97.59   35.40
  -6  -4  11   68.89   33.90
  -4  -4  11  -65.09   23.10
   4  -4 -11   -0.60   27.50
   4   4 -11   34.10   29.70
  -2  -4  11   72.59   24.70
   2  -4 -11   49.90   29.00
   2   4 -11   25.80   29.50
   0  -4  11   79.89   28.30
   0   4 -11  110.89   30.50
  -2  -4 -11    3.70   34.50
  -2   4 -11   30.70   27.90
  -4  -4 -11  131.89   46.00
  -4   4 -11  202.98   42.50
  -6  -4 -11   25.40   46.90
  -6   4 -11  -20.50   39.90
 -11  -5  11   91.19   54.89
   9  -5 -11   30.50   38.10
  -9  -5  11   -8.10   40.70
  -7  -5  11   22.60   35.80
   7  -5 -11   76.99   47.90
  -5  -5  11   55.09   27.40
  -3  -5  11   24.20   23.90
   3   5 -11  -36.50   31.80
   1  -5 -11   13.10   30.30
  -1  -5  11   37.80   25.50
   1   5 -11   29.20   35.30
  -1  -5 -11    0.00   35.20
  -1   5 -11   29.50   29.60
  -3  -5 -11  -10.00   41.30
  -3   5 -11   27.60   30.70
  -5  -5 -11  139.19   53.29
  -5   5 -11  227.38   44.60
   8  -6 -11   14.50   37.60
   6  -6 -11  194.48   47.40
   4  -6 -11   11.00   37.20
   2  -6 -11  178.18   44.60
   0  -6 -11  144.49   41.80
   0   6 -11   51.49   41.20
  -2  -6 -11   -8.00   40.80
  -2   6 -11   22.70   38.30
  -4  -6 -11  211.48   56.59
  -4   6 -11   -2.90   35.90
   9  -7 -11   -3.90   47.00
   7  -7 -11  168.28   51.09
   5  -7 -11  -24.10   39.70
   3  -7 -11  -56.89   39.30
   1  -7 -11  132.19   43.10
  -1  -7 -11  -26.80   41.00
   8   0 -12   55.39   32.70
   6   0 -12   58.99   28.70
   4   0 -12  267.57   41.30
   2   0 -12  108.39   30.50
   0   0 -12    5.10   27.00
  -2   0 -12  557.64   81.79
  -4   0 -12   46.20   42.40
  -6   0 -12  161.78   55.09
  -8   0 -12   11.80   55.39
   9  -1 -12   21.90   30.80
   9   1 -12   54.99   31.80
   7  -1 -12   11.70   30.20
   7   1 -12   17.70   28.20
  -5  -1  12  133.29   40.20
   5  -1 -12   91.39   34.00
   5   1 -12   53.09   31.60
   3  -1 -12  195.98   39.50
  -3  -1  12  260.67   45.40
   3   1 -12  163.68   34.10
   1  -1 -12   28.80   30.70
  -1  -1  12   -7.20   34.10
   1   1 -12  -25.70   23.60
  -1  -1 -12  -23.40   33.60
  -1   1 -12   30.00   29.90
  -3  -1 -12   35.40   38.30
  -3   1 -12   72.89   40.60
  -5  -1 -12  -40.20   41.60
  -5   1 -12   -0.30   42.30
  -7  -1 -12   56.79   54.19
  -7   1 -12  134.59   52.79
  10  -2 -12   57.29   35.80
   8  -2 -12   34.10   32.00
  -8  -2  12  -56.19   41.00
   8   2 -12   69.19   33.50
   6  -2 -12   42.00   29.90
  -6  -2  12   -6.50   35.20
   6   2 -12  -56.39   26.00
  -4  -2  12   61.89   32.10
   4  -2 -12   28.20   28.70
   4   2 -12   50.89   31.70
  -2  -2  12   17.80   32.60
   2  -2 -12  -20.40   27.60
   2   2 -12   32.40   26.30
   0  -2  12   30.40   31.30
   0   2 -12  -40.10   26.10
  -2  -2 -12   20.90   35.70
  -2   2 -12   35.50   33.60
  -4  -2 -12  -58.79   44.00
  -6  -2 -12   46.40   51.19
  -6   2 -12  -61.69   41.60
   9  -3 -12  -35.30   33.70
  -7  -3  12  139.99   42.70
   7   3 -12   51.59   33.80
  -5  -3  12  102.39   33.90
   5  -3 -12   99.29   58.19
   5   3 -12   75.79   33.30
  -3  -3  12  203.38   39.50
   3   3 -12  252.47   43.70
   1  -3 -12   -2.50   33.50
  -1  -3  12    4.30   29.70
   1   3 -12  -44.90   25.80
   1  -3  12  -87.09   32.50
  -1  -3 -12    3.60   37.30
  -1   3 -12   -7.40   28.20
  -3  -3 -12   12.60   44.40
  -3   3 -12   50.69   37.00
  -5  -3 -12  -15.50   48.50
  -5   3 -12  -10.30   50.89
  -7  -3 -12  220.08   61.39
  -7   3 -12  168.38   58.39
  10  -4 -12  158.88   47.80
  -8  -4  12   87.59   46.80
   8  -4 -12   26.90   38.10
  -6  -4  12   36.50   37.80
   6  -4 -12   97.69   35.20
  -4  -4  12   79.29   33.50
   4  -4 -12  135.29   41.60
   4   4 -12  209.38   42.60
  -2  -4  12  107.29   33.00
   2  -4 -12  118.19   37.80
   2   4 -12   87.39   36.10
   0  -4 -12  -24.80   37.00
   0  -4  12   29.80   31.20
   0   4 -12   11.50   31.00
  -2   4 -12  623.94   77.39
  -4  -4 -12  123.69   52.89
  -4   4 -12  -22.20   39.40
  -6  -4 -12  188.68   60.79
  -6   4 -12   55.99   49.80
   9  -5 -12  -15.40   40.20
  -9  -5  12   47.70   48.50
  -7  -5  12  -48.50   40.30
   7  -5 -12   13.40   34.50
   5  -5 -12  172.68   46.80
  -5  -5  12   85.99   33.00
   3  -5 -12  160.08   46.70
  -3  -5  12   85.09   33.80
   3   5 -12  218.98   44.40
   1  -5 -12   91.59   38.30
  -1  -5  12   20.50   42.70
   1   5 -12  -22.60   38.80
  -1  -5 -12  -89.29   40.70
  -1   5 -12   54.09   37.60
  -3  -5 -12  -76.79   46.60
  -3   5 -12  -16.30   36.40
  10  -6 -12   15.80   48.60
   8  -6 -12  102.59   46.40
   6  -6 -12    3.10   39.30
   4  -6 -12   58.19   40.80
   2  -6 -12   16.20   41.00
   0  -6 -12   53.49   45.60
   0   6 -12  101.69   47.30
  -2  -6 -12   89.19   48.90
  -2   6 -12  -11.80   50.49
   5  -7 -12  -35.20   45.30
  10   0 -13  137.89   44.10
   4   0 -13  147.39   40.90
   2   0 -13  319.37   61.99
   0   0 -13   40.40   32.40
  -2   0 -13   78.39   40.90
  -4   0 -13   21.80   46.20
  -6   0 -13  666.93   93.19
   9  -1 -13   45.90   35.40
   7  -1 -13   63.79   38.80
   7   1 -13   56.69   34.60
   5   1 -13   40.60   35.70
   3  -1 -13   17.00   40.10
   3   1 -13   -2.10   28.40
   1  -1 -13   34.10   31.90
   1   1 -13  -13.40   28.80
  -1  -1 -13   50.49   38.70
  -1   1 -13  -26.40   36.90
  -3  -1 -13  -52.19   43.40
  -3   1 -13   42.60   40.70
  -5  -1 -13   29.50   50.19
  -5   1 -13  -22.50   48.40
  10  -2 -13  958.40  109.39
   8  -2 -13   66.69   36.50
   8   2 -13   26.60   38.20
   6  -2 -13  -10.10   34.20
   6   2 -13   91.49   38.20
   4  -2 -13   -4.00   31.80
   4   2 -13  -30.50   32.10
   2  -2 -13  -25.20   28.70
   2   2 -13   37.00   32.30
   0  -2 -13  562.04   77.39
   0   2 -13  425.06   59.49
  -2  -2 -13   71.99   45.10
  -2   2 -13   43.80   39.80
  -4  -2 -13  413.56   71.59
  -4   2 -13  397.56   68.19
   9  -3 -13  -22.90   39.30
   7  -3 -13   -0.50   36.30
   7   3 -13    2.00   38.10
   5  -3 -13   81.19   39.90
   5   3 -13  164.78   42.50
   3  -3 -13   64.39   36.60
   3   3 -13   19.30   35.50
   1  -3 -13   26.40   35.60
   1   3 -13   69.69   35.90
  -1  -3 -13  129.39   47.60
  -1   3 -13  127.19   41.20
  -3  -3 -13  -24.30   44.80
  -3   3 -13   -9.00   38.80
  -5  -3 -13  -35.50   52.29
  -5   3 -13   66.89   49.99
  10  -4 -13   40.80   45.60
   8  -4 -13   41.50   41.80
   6  -4 -13   22.30   38.80
  -6  -4  13  136.29   46.40
   6   4 -13   71.29   43.60
  -4  -4  13   95.69   37.50
   4  -4 -13   58.79   40.90
   4   4 -13   38.80   41.70
  -2  -4  13    8.70   36.50
   2  -4 -13   98.29   38.90
   2   4 -13  123.09   42.50
   0  -4 -13   13.00   41.10
   0   4 -13   44.70   36.00
  -2  -4 -13   50.19   48.80
  -2   4 -13    2.10   39.00
   9  -5 -13   78.89   48.20
   7  -5 -13  264.57   55.19
   5  -5 -13  218.18   51.29
   3  -5 -13  121.79   46.50
   3   5 -13   20.90   44.00
   1  -5 -13   14.90   46.00
   1   5 -13    3.00   43.70
  -1  -5 -13    1.60   49.00
  -1   5 -13   93.89   47.30
   8  -6 -13   75.39   51.59
   6  -6 -13  157.08   51.69
   4  -6 -13   52.09   46.30
   2  -6 -13   65.79   48.90
  10   0 -14   98.59   46.40
   8   0 -14  243.58   54.49
   6   0 -14   59.19   38.50
   4   0 -14  -60.99   35.20
   2   0 -14  284.17   51.59
   0   0 -14  -44.50   35.90
  -2   0 -14  327.87   62.59
  -4   0 -14   22.40   55.19
   9  -1 -14   -0.20   42.70
   9   1 -14   16.70   43.00
   7  -1 -14   37.50   39.60
   7   1 -14  113.69   40.50
   5  -1 -14   31.50   38.30
   5   1 -14  -34.20   32.90
   3  -1 -14   74.69   37.10
   3   1 -14   93.09   37.80
   1  -1 -14   -7.50   36.70
   1   1 -14   69.49   40.20
  -1  -1 -14   46.30   47.70
  -1   1 -14    9.50   41.00
  -3  -1 -14  132.39   52.39
  -3   1 -14  106.69   51.59
  10  -2 -14   -2.70   40.70
   8  -2 -14    6.60   37.30
   8   2 -14   71.69   43.00
   6  -2 -14   -4.20   37.50
   6   2 -14   13.80   41.40
   4  -2 -14  -28.00   40.00
   4   2 -14  -33.90   71.79
   2  -2 -14   46.70   42.00
   2   2 -14   50.49   38.80
   0  -2 -14   46.90   42.10
   0   2 -14    2.20   37.70
  -2  -2 -14   81.59   48.30
  -2   2 -14   43.10   44.90
  11  -3 -14   10.10   46.20
   9  -3 -14   62.49   44.30
   7  -3 -14   14.10   40.90
   5  -3 -14   -2.00   39.10
   5   3 -14   -6.00   66.49
   3  -3 -14   45.30   45.10
   1  -3 -14   69.59   45.90
   1   3 -14   47.70   49.40
  -1  -3 -14   82.89   50.99
  -1   3 -14   76.09   44.80
  10  -4 -14   62.19   50.09
   8  -4 -14   20.20   43.20
   6  -4 -14  -78.09   47.30
   6   4 -14    9.10   45.00
   4  -4 -14  -14.80   40.50
   4   4 -14  -19.10   46.60
   2  -4 -14  140.69   51.39
   2   4 -14  203.58   53.39
   0  -4 -14   -7.20   47.20
   7  -5 -14  127.49   55.19
   5  -5 -14  -46.30   47.40
   3  -5 -14   72.09   52.49
   3   5 -14   60.99   51.09
  10   0 -15  506.35   77.29
   8   0 -15  -15.70   45.70
   6   0 -15  -11.20   43.10
   4   0 -15  -19.50   42.10
   2   0 -15  384.16   66.09
   0   0 -15  -43.00   40.40
   9  -1 -15  228.08   59.89
   9   1 -15  275.97   57.69
   7  -1 -15   23.00   43.80
   7   1 -15  -59.69   41.10
   5  -1 -15  -38.90   40.90
   5   1 -15    9.40   44.00
   3  -1 -15   80.49   47.00
   3   1 -15  159.28   49.50
   1  -1 -15    2.90   47.00
   1   1 -15    7.00   45.80
  -1  -1 -15  148.49   57.79
  -1   1 -15   51.39   44.00
  10  -2 -15   19.00   50.09
   8  -2 -15  101.29   46.10
   8   2 -15  106.59   50.09
   6  -2 -15  -21.30   45.60
   6   2 -15   28.60   46.70
   4  -2 -15  644.54   84.89
   4   2 -15  479.55   71.49
   2  -2 -15   27.80   44.00
   2   2 -15   37.80   46.40
   0  -2 -15  179.28   57.49
   0   2 -15  179.18   51.49
   9  -3 -15  170.88   54.19
   7  -3 -15  203.38   59.09
   7   3 -15  180.58   53.79
   5  -3 -15  171.48   58.39
   5   3 -15  102.39   49.30
   3  -3 -15   83.89   53.39
   3   3 -15  133.29   51.79
   8   0 -16  125.19   54.79
   6   0 -16  655.33   91.39
   4   0 -16  -43.10   48.40
   7  -1 -16   63.19   50.59
   7   1 -16   65.19   50.99
   5  -1 -16   -9.50   50.99
   5   1 -16    1.80   50.39
   0   0   0    0.00    0.00

_computing_structure_solution     'SHELXT 2014/5 (Sheldrick, 2014)'
;
_shelx_hkl_checksum    5880

# start Validation Reply Form
 _vrf_PLAT029_Al13Fe4_a
;
PROBLEM: _diffrn_measured_fraction_theta_full value Low .      0.820 Why? 
RESPONSE: The high angle diffraction data are not very good.
;
_vrf_PLAT911_Al13Fe4_a
;
PROBLEM: Missing FCF Refl Between Thmin & STh/L=    0.600        260 Report
RESPONSE: The missing FCF Refl(ections) Between Thmin & STh/L = 0.600        
260 are caused by the poor high angle diffraction data, actually it has been 
checked manually that the above listed 260 reflection are too weak to be
 integrated and included in the solving and refining the structural model.
;
# end Validation Reply Form

_publcif_info_exptl_table_max_cols 4
_publcif_info_exptl_table_use_headnotes n

loop_
_publcif_info_tables.block_id
_publcif_info_tables.reference_item
"{db8cb23e-3a23-4c8e-812a-91270e5a6c8d}" "_publcif_info_datablock.publ_exptl"

loop_
_publcif_info_cif.paper_type
 EX

loop_
_publcif_info_datablock.id
_publcif_info_datablock.publ_exptl
_publcif_info_datablock.publ_geom
_publcif_info_datablock.structure
'{db8cb23e-3a23-4c8e-812a-91270e5a6c8d}' y y y

loop_
_publcif_info_exptl_table_extra_item
sin_theta_over_lambda_max

loop_
_publcif_info_exptl_table_header_item
?


_publcif_funding_html
;
;
